# Supplementary material for: Synthesis of bicyclo[3.1.0]hexanes by (3 + 2) annulation of cyclopropenes with aminocyclopropanes
Source: Royal Society of Chemistry journal article supplement (doi:10.1039/c9sc03790j), 2019-01-01

# Table of Contents

|                                                                            |    |
|----------------------------------------------------------------------------|----|
| 1. General Methods .....                                                   | 3  |
| 2. Preparation of Starting Materials.....                                  | 4  |
| 2.1 Synthesis of Diazo Compounds.....                                      | 4  |
| 2.2 Synthesis of Cyclopropenes .....                                       | 6  |
| 2.3 Synthesis of Cyclopropylanilines .....                                 | 17 |
| 3. Synthesis of Organic Dyes .....                                         | 22 |
| 4. Preliminary Attempts at the Lewis-Acid Catalysed [3+2] Annulation ..... | 24 |
| 4.1 Synthesis of the Donor-Acceptor Cyclopropane .....                     | 24 |
| 4.2 Preliminary Cycloaddition Attempts .....                               | 24 |
| 5. Optimizations .....                                                     | 26 |
| 6. Photoredox Mediated [3+2] Cycloaddition .....                           | 28 |
| 7. Gram-scale Synthesis of 9 and Product Modifications .....               | 59 |
| 8. Crystal Structure of 16b.....                                           | 64 |
| 9. Spectra of New Compounds .....                                          | 72 |

## 1. General Methods

All reactions were carried out in oven dried glassware under an atmosphere of nitrogen, unless stated otherwise. For quantitative flash chromatography technical grade solvents were used. For flash chromatography for analysis, HPLC grade solvents from Sigma-Aldrich were used. THF, Et<sub>2</sub>O, CH<sub>3</sub>CN, toluene, hexane and CH<sub>2</sub>Cl<sub>2</sub> were dried by passage over activated alumina under nitrogen atmosphere (H<sub>2</sub>O content < 10 ppm, Karl-Fischer titration). The solvents were degassed by Freeze-Pump-Thaw method when mentioned. All chemicals were purchased from Acros, Aldrich, Fluka, VWR, Aplichem, Fluorochem or Merck and used as such unless stated otherwise. Chromatographic purification was performed as flash chromatography using Macherey-Nagel silica 40-63, 60 Å, using the solvents indicated as eluent with 0.1-0.5 bar pressure. TLC was performed on Merck silica gel 60 F254 TLC glass plates or aluminium plates and visualized with UV light, permanganate stain, CAN stain or Anisaldehyde stain. Melting points were measured on a Büchi B-540 melting point apparatus using open glass capillaries, the data is uncorrected. <sup>1</sup>H-NMR spectra were recorded on a Bruker DPX-400 400 MHz spectrometer in chloroform-*d*, all signals are reported in ppm with the internal chloroform signal at 7.26 ppm. The data is being reported as (s = singlet, d = doublet, t = triplet, q = quadruplet, qi = quintet, m = multiplet or unresolved, br = broad signal, app = apparent, coupling constant(s) in Hz, integration, interpretation). <sup>19</sup>F-NMR spectra were recorded on a Bruker DPX-400 376 MHz spectrometer in CDCl<sub>3</sub>. <sup>13</sup>C-NMR spectra were recorded with <sup>1</sup>H-decoupling on a Bruker DPX-400 100 MHz spectrometer in chloroform-*d*, all signals are reported in ppm with the internal chloroform signal at 77.0 ppm. Infrared spectra were recorded on a JASCO FT-IR B4100 spectrophotometer with an ATR PRO410-S and a ZnSe prisma and are reported as cm<sup>-1</sup> (w = weak, m = medium, s = strong, br = broad). High resolution mass spectrometric measurements were performed by the mass spectrometry service of ISIC at the EPFL on a MICROMASS (ESI) Q-TOF Ultima API.

Photoredox catalyzed reactions were performed in test tubes (2, 5 and 10 mL), which were held using a rack for test tubes placed at the center of a crystallization flask or regular clamps. On this flask were attached the blue LEDs (RUBAN LED 5MÈTRES - 60LED/M - 3528 BLEU - IP65 with Transformateur pour Ruban LED 24W/2A/12V, bought directly on RubanLED.com). The distance between the LEDs and the test tubes was approximatively 3 to 5 cm. Long irradiation resulted in temperature increasing up to 32 °C during overnight reactions.

## 2. Preparation of Starting Materials

### 2.1 Synthesis of Diazo Compounds

#### Dimethyl 2-diazomalonate (**54**)

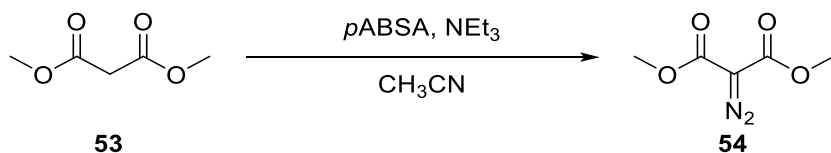

Following a modified procedure,<sup>1</sup> triethylamine (13.4 mL, 96.0 mmol, 2.4 equiv.) and dimethyl malonate (**53**) (4.60 mL, 40.0 mmol, 1.0 equiv.) were added to a solution of *p*ABSA (14.4 g, 60.0 mmol, 1.5 equiv.) in  $\text{CH}_3\text{CN}$  (160 mL) at room temperature and the resulting mixture was stirred for 18 hours at room temperature. Thereafter the mixture was filtered and the solvent was evaporated. The residue was triturated with  $\text{CH}_2\text{Cl}_2$  (100 mL), the remaining solids were filtered off and the solvent was evaporated. The crude residue was purified by column chromatography ( $\text{SiO}_2$ , Pentane:EtOAc 95:5 to 90:10) to afford compound **54** (6.26 g, 39.6 mmol, 99 % yield) as a yellow oil. <sup>1</sup>H NMR (400 MHz, Chloroform-*d*)  $\delta$  3.84 (s, 6H,  $\text{CH}_3$ ); <sup>13</sup>C NMR (101 MHz, Chloroform-*d*)  $\delta$  161.2, 52.4. One carbon was not resolved. The characterization data is corresponding to the reported values.<sup>1</sup>

#### Dibenzyl 2-diazomalonate (**56**)

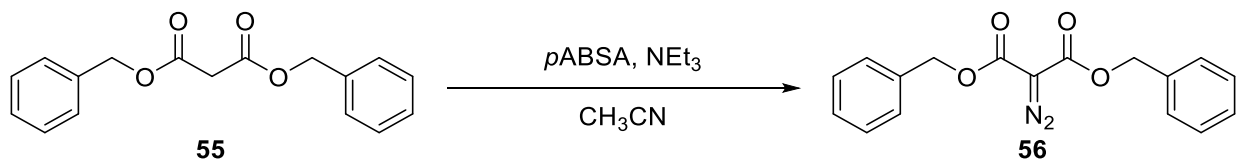

Following a modified procedure,<sup>2</sup> triethylamine (1.0 mL, 7.2 mmol, 2.4 equiv.) and dibenzyl malonate (**55**) (0.75 mL, 4.0 mmol, 1.0 equiv.) were added to a solution of *p*ABSA (1.08 g, 4.50 mmol, 1.5 equiv.) in  $\text{CH}_3\text{CN}$  (16.0 mL) at room temperature and the resulting mixture was stirred for 18 hours at room temperature. Thereafter the mixture was filtered and the solvent was evaporated. The residue was triturated with  $\text{CH}_2\text{Cl}_2$  (15 mL), the remaining solids were filtered off and the solvent was evaporated. The crude residue was purified by column chromatography ( $\text{SiO}_2$ , Pentane:EtOAc 95:5) to afford compound **56** (889 mg, 2.86 mmol, 95% yield) as a yellow oil. <sup>1</sup>H NMR (400 MHz, Chloroform-*d*)  $\delta$  7.39–7.34 (m, 10H, ArH), 5.28 (s, 4H,  $\text{CH}_2$ ); <sup>13</sup>C NMR (101 MHz, Chloroform-*d*)  $\delta$  160.9, 135.3, 128.8, 128.6, 128.5, 67.3. One carbon was not resolved. The characterization data correspond to the reported values.<sup>2</sup>

<sup>1</sup> F. de Nanteuil, J. Waser, *Angew. Chem. Int. Ed.* **2011**, *50*, 12075–12079.

<sup>2</sup> F. de Nanteuil, J. Loup, J. Waser, *Org. Lett.* **2013**, *15*, 3738–3741.



### Bis(2,2,2-trifluoroethyl) malonate (**59**)

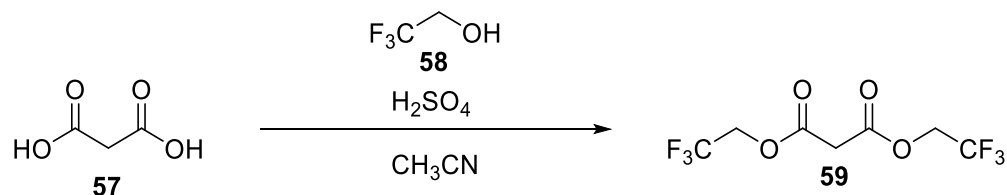

Following a reported procedure,<sup>2</sup>  $\text{H}_2\text{SO}_4$  (1.00 mL, 18.8 mmol, 0.25 equiv.) was added to a solution of trifluoroethanol (**58**) (29.9 mL, 415 mmol, 5.4 equiv.) and malonic acid **57** (8.00 g, 77.0 mmol, 1.0 equiv.) in toluene (40.0 mL) and the resulting mixture was heated to reflux for 8 hours. After cooling to room temperature, toluene (80.0 mL) was added and the mixture was washed with aq. NaOH (200 mL, 1 M), water (200 mL) and brine (200 mL). The organic layer was dried over  $\text{MgSO}_4$  and the solvent was evaporated under reduced pressure to afford the title compound **59** (6.80 g, 25.4 mmol, 33 % yield) as a colorless oil.  $^1\text{H}$  NMR (400 MHz, *Chloroform-d*)  $\delta$  4.55 (q,  $J$  = 8.2 Hz, 4H,  $\text{OCH}_2$ ), 3.61 (s, 2H,  $\text{CH}_2$ );  $^{13}\text{C}$  NMR (101 MHz, *Chloroform-d*)  $\delta$  164.4, 122.8 (q,  $J$  = 277.3 Hz), 61.4 (q,  $J$  = 37.0 Hz), 40.3. The characterization data correspond to the reported values.<sup>2</sup>

### Bis(2,2,2-trifluoroethyl) 2-diazomalonate (**60**)

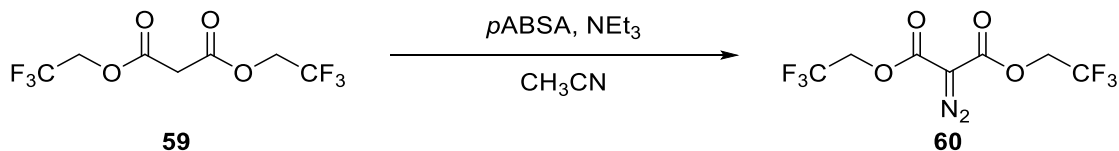

Following a modified procedure,<sup>2</sup> triethylamine (6.00 mL, 43.3 mmol, 2.4 equiv.) and bis(trifluoroethyl)malonate (**59**) (4.84 g, 18.0 mmol, 1.0 equiv.) were added to a solution of  $p\text{ABSA}$  (6.50 g, 27.1 mmol, 1.5 equiv.) in  $\text{CH}_3\text{CN}$  (72.0 mL) at room temperature and the resulting mixture was stirred for 18 hours. Thereafter the mixture was filtered and the solvent was evaporated. The residue was triturated with  $\text{CH}_2\text{Cl}_2$  (50 mL), the solids were filtered off and the solvent was evaporated. The crude residue was purified by column chromatography ( $\text{SiO}_2$ , Pentane:EtOAc 95:5 to 90:10) to afford compound **60** (5.26 g, 17.9 mmol, 99 % yield) as a yellow oil.  $^1\text{H}$  NMR (400 MHz, *Chloroform-d*)  $\delta$  4.62 (q, 4 H,  $J$  = 8.2 Hz,  $\text{CH}_2$ );  $^{13}\text{C}$  NMR (101 MHz, *Chloroform-d*)  $\delta$  158.7, 122.6 (q,  $J$  = 277.3 Hz), 60.9 (q,  $J$  = 37.0 Hz). One carbon was not resolved. The characterization data correspond to the reported values.<sup>2</sup>

## 2.2 Synthesis of Cyclopropenes

**General procedure A:** Synthesis of cyclopropenes from diazo compounds.

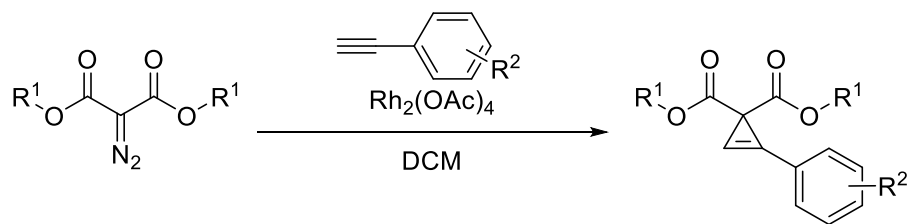

Following a modified procedure,<sup>3</sup> the diazo compound was dissolved in DCM (0.5 M) and the resulting solution was added via syringe pump to a suspension of  $\text{Rh}_2(\text{OAc})_4$  (0.01 equiv.) in the indicated acetylene (3.0 equiv.) at room temperature over 10 hours. After the addition was complete, the reaction mixture was allowed to stir for another 10 hours. The reaction mixture was then filtered through a small pad of silica eluting with  $\text{CH}_2\text{Cl}_2$  and the filtrate was concentrated under reduced pressure. The crude residue was purified by column chromatography with the indicated solvents.

**General procedure B:** Synthesis of difluorocyclopropenes.

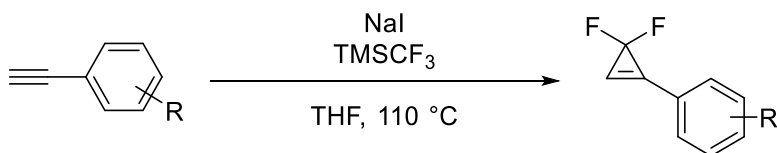

Following a modified procedure,<sup>4</sup> a 20 mL microwave vial was charged with NaI (2.2 equiv.). The vial was sealed, evacuated and back-filled with nitrogen (3 times). Then THF (0.33 M),  $\text{TMSCF}_3$  (2 equiv.) and the alkyne (1 equiv.), were added via syringe. The resulting reaction mixture was then stirred at 110 °C for 4 hours. The reaction was quenched by adding a saturated  $\text{Na}_2\text{CO}_3$  solution, followed by extraction with  $\text{Et}_2\text{O}$ . The combined organic layers were dried over anhydrous  $\text{K}_2\text{CO}_3$ , filtered, and evaporated under reduced pressure. The crude residue was purified by column chromatography with the indicated solvents (the column should be previously deactivated with a 97:3 mixture of Pentane: $\text{Et}_3\text{N}$ ).

<sup>3</sup> S. Chuprakov, M. Rubin, V. Gevorgyan, *J. Am. Chem. Soc.* **2005**, 127, 3714-3715.

<sup>4</sup> F. Wang, T. Luo, J. Hu, Y. Wang, H. S. Krishnan, P. V. Jog, S. K. Ganesh, G. K. Suryah Prakash, G. A. Olah, *Angew. Chem. Int. Ed.* **2011**, 50, 7153–7157.

### Dimethyl 2-phenylcycloprop-2-ene-1,1-dicarboxylate (**7**)

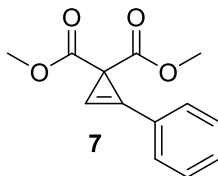

Following the general procedure A, starting from dimethyl 2-diazomalonate (**54**) (5.10 g, 32.0 mmol, 1.0 equiv.) and phenylacetylene (**61**) (10.54 mL, 96.00 mmol, 3.0 equiv.), the title compound **7** was obtained after purification by column chromatography (SiO<sub>2</sub>, Pentane:Et<sub>2</sub>O 80:20) as a pale yellow solid (5.08 g, 21.9 mmol, 68 % yield). <sup>1</sup>H NMR (400 MHz, Chloroform-*d*) δ 7.67 – 7.60 (m, 2H, ArH), 7.48 – 7.41 (m, 3H, ArH), 6.89 (s, 1H, C=CH), 3.74 (s, 6H, CH<sub>3</sub>); <sup>13</sup>C NMR (101 MHz, Chloroform-*d*) 171.3, 130.8, 130.4, 128.8, 123.5, 112.2, 95.1, 52.3, 32.8. The characterization data correspond to the reported values.<sup>5</sup>

### Dibenzyl 2-phenylcycloprop-2-ene-1,1-dicarboxylate (**61**)

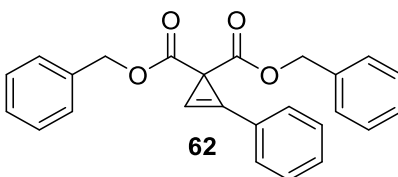

Following the general procedure A, starting from dibenzyl 2-diazomalonate (**56**) (889 mg, 2.86 mmol, 1.0 equiv.) and phenylacetylene (**61**) (0.95 mL, 8.5 mmol, 3.0 equiv.), the title compound **62** was obtained after purification by column chromatography (SiO<sub>2</sub>, Pentane:Et<sub>2</sub>O 80:20 to 70:30) as a pale yellow solid (738 mg, 1.92 mmol, 67 % yield). <sup>1</sup>H NMR (400 MHz, Chloroform-*d*) δ 7.64 – 7.58 (m, 2H, ArH), 7.44 – 7.40 (m, 3H, ArH), 7.31 – 7.26 (m, 10H, ArH), 6.91 (s, 1H, C=CH), 5.18 (s, 4H, CH<sub>2</sub>); <sup>13</sup>C NMR (101 MHz, Chloroform-*d*) δ 170.7, 135.9, 130.7, 130.5, 129.0, 128.6, 128.2, 128.0, 124.1, 112.5, 95.3, 67.0, 33.5. The characterization data correspond to the reported values.<sup>6</sup>

### Bis(2,2,2-trifluoroethyl) 2-phenylcycloprop-2-ene-1,1-dicarboxylate (**63**)

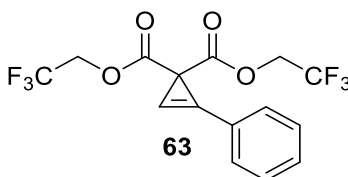

Following the general procedure A, starting from bis(2,2,2-trifluoroethyl) 2-diazomalonate (**57**) (935 mg, 3.18 mmol, 1.0 equiv.) and phenylacetylene (**61**) (1.05 mL, 9.54 mmol, 3.0 equiv.), the title compound **63** was obtained after purification by column chromatography (SiO<sub>2</sub>, Pentane:Et<sub>2</sub>O 90:10 to 80:20) as a pale yellow oil (542 mg, 1.47 mmol, 46 % yield). *R*<sub>f</sub> 0.55

<sup>5</sup> L.-A. Liao, F. Zhang, N. Yan, J. A. Golen, J. M. Fox, *Tetrahedron* **2004**, 60, 1803–1816.

<sup>6</sup> Y. Wang, E. A. F. Fordyce, F. Y. Chen, H. W. Lam, *Angew. Chem. Int. Ed.* **2008**, 47, 7350–7353.

(Pentane:Et<sub>2</sub>O 80:20). **<sup>1</sup>H NMR (400 MHz, Chloroform-*d*)** δ 7.66 – 7.57 (m, 2H, ArH), 7.51 – 7.44 (m, 3H, ArH), 6.92 (s, 1H, C=CH), 4.53 (qd, *J* = 8.3, 6.3 Hz, 4H, CH<sub>2</sub>); **<sup>13</sup>C NMR (101 MHz, Chloroform-*d*)** δ 168.6, 131.4, 130.5, 129.2, 123.0, 122.8 (q, *J* = 277.3 Hz), 111.7, 93.9, 61.1 (q, *J* = 37.0 Hz), 32.5; **<sup>19</sup>F NMR (376 MHz, Chloroform-*d*)** δ -73.9 (t, *J* = 8.3 Hz); **IR**  $\tilde{\nu}_{\text{max}}$  3663 (w), 2983 (m), 2899 (m), 1758 (m), 1452 (w), 1409 (m), 1288 (s), 1253 (s), 1228 (m), 1171 (s), 1084 (s), 976 (w), 882 (w), 847 (w); **HRMS (ESI)** calcd for C<sub>15</sub>H<sub>10</sub>F<sub>6</sub>NaO<sub>4</sub><sup>+</sup> [M+Na]<sup>+</sup> 391.0375; found 391.0370.

## 2-Phenylcycloprop-2-ene-1,1-dicarbonitrile (**65**)

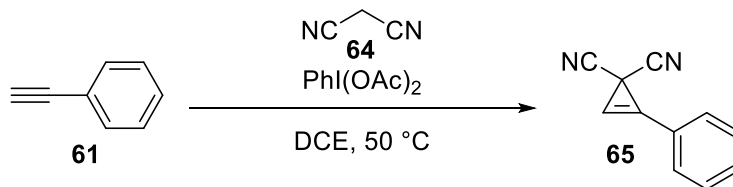

Following a reported procedure,<sup>7</sup> PhI(OAc)<sub>2</sub> (773 mg, 2.40 mmol, 1.2 equiv.) and malonitrile (**64**) (159 mg, 2.40 mmol, 1.2 equiv.) were charged in a 25 mL microwave vial. Then Phenylacetylene (**61**) (0.22 mL, 2.0 mmol, 1.0 equiv.) and DCE (8.0 mL) were added, and the resulting solution was stirred at 50 °C. After 3 hours, the reaction mixture was cooled to room temperature, quenched with water (25 mL), and extracted with DCM (3 x 20 mL). The combined organic layers were evaporated under reduced pressure. The crude residue was purified by column chromatography (SiO<sub>2</sub>, Pentane:EtOAc 90:10) affording the title compound **65** (82 mg, 0.49 mmol, 25 % yield) as an orange oil. **<sup>1</sup>H NMR (400 MHz, Chloroform-*d*)** δ 7.76 – 7.70 (m, 2H, ArH), 7.66 – 7.56 (m, 3H, ArH), 7.08 (s, 1H, C=CH); **<sup>13</sup>C NMR (101 MHz, Chloroform-*d*)** δ 133.1, 130.7, 129.8, 120.5, 116.3, 112.2, 92.7, 3.9. The characterization data correspond to the reported values.<sup>7</sup>

## 1-(3,3-Difluorocycloprop-1-en-1-yl)-4-methylbenzene (**66**)

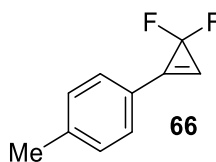

Following the general procedure B, starting from 1-ethynyl-4-methylbenzene (**67**) (0.51 mL, 4.0 mmol, 1.0 equiv.), the title compound **66** was obtained after purification by column chromatography (SiO<sub>2</sub>, Pentane:Et<sub>3</sub>N 95:5) as a brown solid (584 mg, 3.51 mmol, 88 % yield). **<sup>1</sup>H NMR (400 MHz, Chloroform-*d*)** δ 7.55 (d, *J* = 8.0 Hz, 2H, ArH), 7.38 (t, *J* = 1.8 Hz, 1H, C=CH), 7.29 (d, *J* = 7.8 Hz, 2H, ArH), 2.42 (s, 3H, CH<sub>3</sub>); **<sup>13</sup>C NMR (101 MHz, Chloroform-*d*)** δ 142.4, 133.7 (t, *J* = 10.2 Hz), 130.2, 129.6, 120.4, 112.2 (t, *J* = 12.5 Hz), 101.7 (t, *J* = 268.1 Hz), 21.8. The characterization data correspond to the reported values.<sup>8</sup>

<sup>7</sup> S. Lin, M. Li, Z. Dong, F. Liang, J. Zhang, *Org. Biomol. Chem.* **2014**, *12*, 1341–1350.

<sup>8</sup> F. Wang, W. Zhang, J. Zhu, H. Li, K.-W. Huang, J. Hu, *Chem. Commun.* **2011**, *47*, 2411–2413.

### 6,6-Dimethyl-1-(p-tolyl)-4,8-dioxaspiro[2.5]oct-1-ene (70)

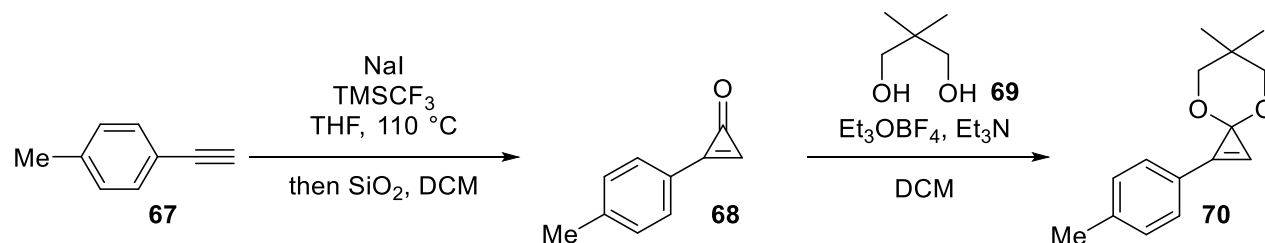

A 20 mL microwave vial was charged with NaI (0.66 g, 4.4 mmol, 2.2 equiv.). The vial was sealed, evacuated and back-filled with nitrogen (3 times). Then THF (6 mL), TMSCF<sub>3</sub> (0.64 mL, 4.0 mmol, 2 equiv.) and 1-ethynyl-4-methylbenzene (**67**) (0.25 mL, 2.0 mmol, 1 equiv.), were added via syringe. The resulting reaction mixture was then stirred at 110 °C for 4 hours. The reaction was quenched by adding a saturated Na<sub>2</sub>CO<sub>3</sub> solution, followed by extraction with Et<sub>2</sub>O. The combined organic layers were dried over anhydrous K<sub>2</sub>CO<sub>3</sub>, filtered, and evaporated under reduced pressure. 3.50 g of SiO<sub>2</sub> and 10 mL of DCM were added to the previously obtained crude product, and the resulting mixture was left stirring overnight. The suspension was then filtered through a small pad of silica gel eluting with EtOAc, and the filtrate was concentrated under reduced pressure. The crude residue was purified by column chromatography (SiO<sub>2</sub>, 100 % Et<sub>2</sub>O) affording compound **68** (262 mg, 1.82 mmol, 91 % yield) as a brown oil. **R<sub>f</sub>** 0.25 (100% Et<sub>2</sub>O); **<sup>1</sup>H NMR (400 MHz, Chloroform-*d*)** δ 8.41 (s, 1H, C=CH), 7.75 (d, *J* = 8.1 Hz, 2H, ArH), 7.35 (d, *J* = 7.8 Hz, 2H, ArH), 2.45 (s, 3H, CH<sub>3</sub>); **<sup>13</sup>C NMR (101 MHz, Chloroform-*d*)** δ 161.8, 155.5, 144.8, 139.2, 131.4, 130.2, 120.7, 22.1; **IR**  $\tilde{\nu}_{\text{max}}$  3052 (w), 1826 (s), 1609 (s), 1587 (s), 1567 (m), 1497 (m), 1451 (w), 1416 (w), 1214 (w), 1183 (w), 1114 (w), 812 (m); **HRMS (ESI)** calcd for C<sub>10</sub>H<sub>9</sub>O<sup>+</sup> [M+H]<sup>+</sup> 145.0648; found 145.0647.

Et<sub>3</sub>OBF<sub>4</sub> (0.285 g, 1.50 mmol, 1.5 equiv.) was added to a solution of 2-(p-tolyl)cycloprop-2-en-1-one (**68**) (144 mg, 1.00 mmol, 1 equiv.) in DCM (1.6 mL) under vigorous stirring at room temperature. After 30 min, a solution of 2,2-dimethylpropane-1,3-diol (**69**) (0.208 g, 2.00 mmol, 2 equiv.) and Et<sub>3</sub>N (0.278 mL, 2.00 mmol) in DCM (0.55 mL) was added dropwise. After 2 h, the reaction was treated with NaHCO<sub>3</sub> (10 mL), followed by extraction with DCM (2 x 10 mL). Combined organic layers were further washed with NaHCO<sub>3</sub> (20 mL), dried over Na<sub>2</sub>SO<sub>4</sub>, filtered, and concentrated under reduced pressure. The crude residue was purified by column chromatography (SiO<sub>2</sub>, Pentane:Et<sub>3</sub>N 98:2, the column should be previously eluted with Pentane:Et<sub>3</sub>N 95:5) affording compound **70** (164 mg, 0.711 mmol, 71 % yield) as an orange solid. **R<sub>f</sub>** 0.32 (Pentane:Et<sub>2</sub>O 90:10); **m.p** = 63-64 °C; **<sup>1</sup>H NMR (400 MHz, Chloroform-*d*)** δ 7.60 (s, 1H, C=CH), 7.53 (d, *J* = 8.1 Hz, 2H, ArH), 7.24 (d, *J* = 7.8 Hz, 2H, ArH), 3.82 – 3.68 (m, 4H, OCH<sub>2</sub>), 2.39 (s, 3H, C<sub>Ar</sub>-CH<sub>3</sub>), 1.14 (s, 3H, CH<sub>3</sub>), 1.08 (s, 3H, CH<sub>3</sub>); **<sup>13</sup>C NMR (101 MHz, Chloroform-*d*)** δ 140.4, 135.6, 129.8, 129.6, 123.2, 113.3, 83.3, 78.0, 30.6, 22.6, 22.4, 21.7; **IR**  $\tilde{\nu}_{\text{max}}$  3106 (w), 3031 (w), 2952 (m), 2851 (m), 1721 (w), 1610 (w), 1508 (w), 1465 (w), 1269 (s), 1206 (m), 1173 (w), 1077 (s), 1023 (s), 995 (m), 925 (w), 823 (m), 750 (m), 650 (w), 618 (w); **HRMS (APPI)** calcd for C<sub>15</sub>H<sub>18</sub>O<sub>2</sub><sup>+</sup> [M]<sup>+</sup> 230.1301; found 230.1303.

### Dimethyl 2-(4-(*tert*-butyl)phenyl)cycloprop-2-ene-1,1-dicarboxylate (**71**)

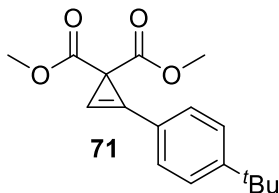

Following the general procedure A, starting from dimethyl 2-diazomalonate (**54**) (395 mg, 2.50 mmol, 1.0 equiv.) and 1-(*tert*-butyl)-4-ethynylbenzene (1.35 mL, 7.50 mmol, 3.0 equiv.), the title compound **71** was obtained after purification by column chromatography (SiO<sub>2</sub>, Pentane:EtOAc 95:5 to 90:10) as an orange solid (517 mg, 1.79 mmol, 72 % yield). **<sup>1</sup>H NMR (400 MHz, Chloroform-*d*)**  $\delta$  7.58 – 7.54 (m, 2H, ArH), 7.49 – 7.44 (m, 2H, ArH), 6.82 (s, 1H, C=CH), 3.73 (s, 6H, OCH<sub>3</sub>), 1.33 (s, 9H, *t*Bu); **<sup>13</sup>C NMR (101 MHz, Chloroform-*d*)**  $\delta$  171.4, 154.3, 130.3, 126.1, 121.2, 112.1, 94.3, 52.5, 35.2, 32.8, 31.3. The characterization data correspond to the reported values.<sup>9</sup>

### Dimethyl 2-(3-fluorophenyl)cycloprop-2-ene-1,1-dicarboxylate (**72**)

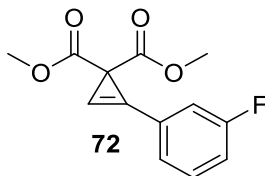

Following the general procedure A, starting from dimethyl 2-diazomalonate (**54**) (316 mg, 2.0 mmol, 1.0 equiv.) and 1-ethynyl-3-fluorobenzene (0.69 mL, 6.0 mmol, 3.0 equiv.), the title compound **72** was obtained after purification by column chromatography (SiO<sub>2</sub>, Pentane:EtOAc 90:10) as a pale yellow oil (282 mg, 1.13 mmol, 56 % yield). *R<sub>f</sub>* 0.37 (Pentane:EtOAc 90:10); **<sup>1</sup>H NMR (400 MHz, Chloroform-*d*)**  $\delta$  7.44 – 7.40 (m, 2H, ArH), 7.33 (dd, *J* = 9.0, 2.5 Hz, 1H, ArH), 7.18 – 7.11 (m, 1H, ArH), 6.96 (s, 1H, C=CH), 3.75 (s, 6H, OCH<sub>3</sub>); **<sup>13</sup>C NMR (101 MHz, Chloroform-*d*)**  $\delta$  171.0, 162.9 (d, *J* = 248.0 Hz), 130.7 (d, *J* = 8.4 Hz), 126.3 (d, *J* = 3.1 Hz), 126.1 (d, *J* = 8.3 Hz), 117.9 (d, *J* = 21.2 Hz), 117.1 (d, *J* = 22.7 Hz), 111.7 (d, *J* = 3.4 Hz), 97.0, 52.7, 33.2; **<sup>19</sup>F NMR (376 MHz, Chloroform-*d*)**  $\delta$  -111.9; **IR**  $\tilde{\nu}_{\text{max}}$  3149 (w), 2955 (w), 2924 (w), 2851 (w), 1736 (s), 1609 (w), 1586 (m), 1484 (w), 1436 (m), 1288 (s), 1244 (s), 1067 (s), 870 (m); **HRMS (ESI)** calcd for C<sub>13</sub>H<sub>11</sub>FN<sub>4</sub>O<sub>4</sub><sup>+</sup> [M+Na]<sup>+</sup> 273.0534; found 273.0534.

### 1-Bromo-4-(3,3-difluorocycloprop-1-en-1-yl)benzene (**73**)

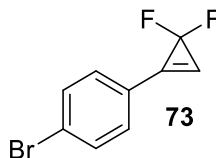

<sup>9</sup> Y. Liu, Q. Yu, S. Ma, *Eur. J. Org. Chem.* **2013**, 3033–3040.

Following the general procedure B, starting from 1-bromo-4-ethynylbenzene (0.36 g, 2.0 mmol, 1.0 equiv.), the title compound **73** was obtained after purification by column chromatography (SiO<sub>2</sub>, Pentane:Et<sub>3</sub>N 95:5) as a light brown oil (360 mg, 1.56 mmol, 78 % yield). *R<sub>f</sub>* 0.35 (Pentane:Et<sub>3</sub>N 96:4); <sup>1</sup>H NMR (400 MHz, Chloroform-*d*) δ 7.67 – 7.60 (m, 2H, ArH), 7.56 – 7.49 (m, 3H, ArH & C=CH); <sup>13</sup>C NMR (101 MHz, Chloroform-*d*) δ 133.2 (t, *J* = 10.7 Hz), 132.6, 131.6, 126.5, 122.4, 114.4 (t, *J* = 12.4 Hz), 101.4 (t, *J* = 270.3 Hz); <sup>19</sup>F NMR (376 MHz, Chloroform-*d*) δ -106.6; IR  $\tilde{\nu}_{\text{max}}$  3134 (w), 1717 (w), 1586 (m), 1482 (m), 1402 (w), 1313 (s), 1286 (s), 1230 (w), 1180 (w), 1105 (w), 1071 (m), 1017 (s), 972 (w), 838 (m), 818 (s); HRMS (APPI) calcd for C<sub>9</sub>H<sub>5</sub><sup>79</sup>BrF<sub>2</sub> [M<sup>+</sup>] 229.9537; found 229.9540.

#### 1-(3,3-Difluorocycloprop-1-en-1-yl)-4-methoxybenzene (**74**)

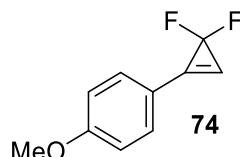

Following the general procedure B, starting from 1-ethynyl-4-methoxybenzene (0.39 mL, 3.0 mmol, 1.0 equiv.), the title compound **74** was obtained after purification by column chromatography (SiO<sub>2</sub>, Pentane:Et<sub>3</sub>N 95:5) as a brown oil (519 mg, 2.85 mmol, 95 % yield). <sup>1</sup>H NMR (400 MHz, Chloroform-*d*) δ 7.63 – 7.58 (m, 2H, ArH), 7.28 (t, *J* = 1.9 Hz, 1H, C=CH), 7.02 – 6.96 (m, 2H, ArH), 3.87 (s, 3H, OMe); <sup>13</sup>C NMR (101 MHz, Chloroform-*d*) δ 162.3, 133.3 (t, *J* = 10.3 Hz), 132.1, 116.1, 114.7, 110.5 (t, *J* = 12.5 Hz), 102.1 (t, *J* = 269.4 Hz), 55.6. The characterization data correspond to the reported values.<sup>10</sup>

#### 1-Chloro-3-(3,3-difluorocycloprop-1-en-1-yl)benzene (**75**)

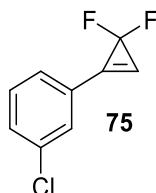

Following the general procedure B, starting from 1-chloro-3-ethynylbenzene (0.25 mL, 2.0 mmol, 1.0 equiv.), the title compound **75** was obtained after purification by column chromatography (SiO<sub>2</sub>, Pentane:Et<sub>3</sub>N 95:5) as a brown oil (263 mg, 1.41 mmol, 71 % yield). *R<sub>f</sub>* 0.32 (Pentane:Et<sub>3</sub>N 96:4); <sup>1</sup>H NMR (400 MHz, Chloroform-*d*) δ 7.65 (t, *J* = 1.7 Hz, 1H, C=CH), 7.57 – 7.52 (m, 2H, ArH), 7.50 – 7.41 (m, 2H, ArH); <sup>13</sup>C NMR (101 MHz, Chloroform-*d*) δ 135.3, 133.2 (t, *J* = 10.9 Hz), 131.8, 130.5, 130.1, 128.3, 125.1, 115.3 (t, *J* = 12.3 Hz), 101.3 (t, *J* = 270.7 Hz); <sup>19</sup>F NMR (376 MHz, Chloroform-*d*) δ -106.4; IR  $\tilde{\nu}_{\text{max}}$  3137 (w), 1723 (w), 1569 (w), 1471 (w), 1421 (w), 1303 (s), 1236 (w), 1026 (s), 976 (w), 890 (w), 828 (m); HRMS (APPI) calcd for C<sub>9</sub>H<sub>5</sub>ClF<sub>2</sub> [M<sup>+</sup>] 167.0058; found 167.0057.

<sup>10</sup> X.-Y. Deng, J.-H. Lin, J. Zheng, J.-C. Xiao, *Chem. Commun.* **2015**, 51, 8805-8808.

### Dimethyl 2-(trimethylsilyl)cycloprop-2-ene-1,1-dicarboxylate (**77**)

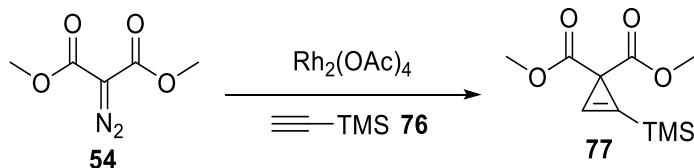

Following a modified procedure,<sup>11</sup> a solution of dimethyl 2-diazomalonate (**54**) (0.79 g, 5.0 mmol, 1.0 equiv.) in ethynyltrimethylsilane (**76**) (2 mL) was added using a syringe pump over 18 hours to a refluxing stirred suspension of Rh<sub>2</sub>(OAc)<sub>4</sub> (22 mg, 0.050 mmol, 0.01 equiv.) in ethynyltrimethylsilane (**76**) (10 mL). After the addition was complete, the reaction mixture was stirred at reflux for an additional 4 hours. The suspension was then filtered through a small pad of silica gel eluting with DCM, and the filtrate was evaporated under reduced pressure. The crude residue was purified by column chromatography (SiO<sub>2</sub>, Pentane:EtOAc 90:10) affording the title compound **77** (824 mg, 3.61 mmol, 72 % yield) as a colorless oil. <sup>1</sup>H NMR (400 MHz, Chloroform-d) δ 7.05 (s, 1H, C=CH), 3.70 (s, 6H, OCH<sub>3</sub>), 0.25 (s, 9H, TMS); <sup>13</sup>C NMR (101 MHz, Chloroform-d) δ 172.4, 113.5, 110.8, 52.8, 30.8, -1.7. The characterization data correspond to the reported values.<sup>11</sup>

### Dimethyl cycloprop-2-ene-1,1-dicarboxylate (**78**)

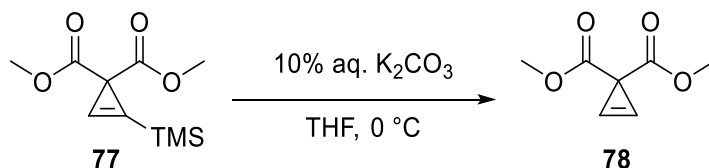

Following a reported procedure,<sup>12</sup> to a stirred solution of dimethyl 2-(trimethylsilyl)cycloprop-2-ene-1,1-dicarboxylate (**77**) (355 mg, 1.55 mmol, 1 equiv.) in THF (3 mL) was added dropwise a 10% aq. K<sub>2</sub>CO<sub>3</sub> solution (2 mL). The reaction mixture was stirred for 30 min at 0 °C and 30 min at room temperature. Then brine (5 mL) was added and the phases were separated. The organic phase was further washed with brine (2 x 5 mL), dried over Na<sub>2</sub>SO<sub>4</sub>, filtered and concentrated under reduced pressure. The crude residue was purified by column chromatography (SiO<sub>2</sub>, Pentane:EtOAc 85:15) affording compound **78** (150 mg, 0.961 mmol, 62 % yield) as a colorless oil. <sup>1</sup>H NMR (400 MHz, Chloroform-d) δ 6.90 (s, 2H, HC=CH), 3.73 (s, 6H, OCH<sub>3</sub>); <sup>13</sup>C NMR (101 MHz, Chloroform-d) δ 171.9, 102.5, 52.7, 30.3. The characterization data correspond to the reported values.<sup>12</sup>

<sup>11</sup> S. Chuprakov, D. A. Malyshev, A. Trofimov, V. Gevorgyan, *J. Am. Chem. Soc.* **2007**, *129*, 14868-14869.

<sup>12</sup> K. Krämer, P. Leong, M. Lautens, *Org. Lett.* **2011**, *13*, 819-821.



### Dimethyl 2-butylcycloprop-2-ene-1,1-dicarboxylate (**80**)

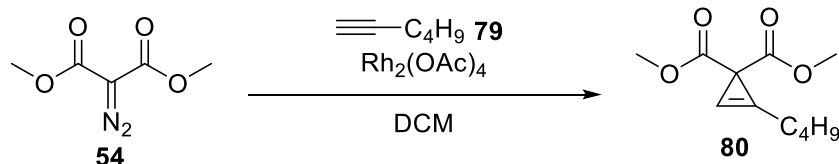

A solution of dimethyl 2-diazomalonate (**54**) (395 mg, 2.50 mmol, 1.0 equiv.) in DCM (1.75 mL) was added using a syringe pump over 15 hours to a stirred mixture of hex-1-yne (**79**) (1.15 mL, 10.0 mmol, 4.0 equiv.) and  $\text{Rh}_2(\text{OAc})_4$  (11.1 mg, 0.025 mmol, 0.01 equiv.) in DCM (2.0 mL). After the addition was complete, the mixture was stirred for additional 3 hours. The suspension was then filtered through a small pad of silica gel eluting with DCM, and the filtrate was evaporated under reduced pressure. The crude residue was purified by column chromatography ( $\text{SiO}_2$ , Pentane:EtOAc 90:10) affording the title compound **80** (240 mg, 1.13 mmol, 45 % yield) as a pale yellow oil.  $^1\text{H}$  NMR (400 MHz,  $\text{CHCl}_3$ - $d$ )  $\delta$  6.35 (t,  $J$  = 1.4 Hz, 1H, C=CH), 3.71 (s, 6H,  $\text{OCH}_3$ ), 2.55 (td,  $J$  = 7.4, 1.4 Hz, 2H,  $\text{CH}_2\text{CH}_2\text{CH}_2\text{CH}_3$ ), 1.60 – 1.53 (m, 2H,  $\text{CH}_2\text{CH}_2\text{CH}_2\text{CH}_3$ ), 1.44 – 1.32 (m, 2H,  $\text{CH}_2\text{CH}_2\text{CH}_2\text{CH}_3$ ), 0.91 (t,  $J$  = 7.3 Hz, 3H,  $\text{CH}_2\text{CH}_2\text{CH}_2\text{CH}_3$ );  $^{13}\text{C}$  NMR (101 MHz,  $\text{CHCl}_3$ - $d$ ) 172.5, 114.8, 93.8, 52.8, 32.4, 29.1, 24.5, 22.5, 14.2. The characterization data correspond to the reported values.<sup>5</sup>

### Dimethyl 2,3-diphenylcycloprop-2-ene-1,1-dicarboxylate (**82**)

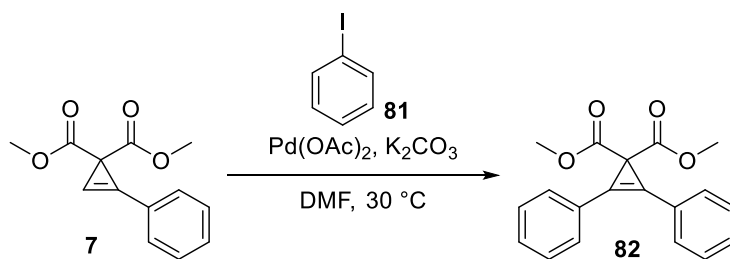

Following a reported procedure,<sup>3</sup> a 5 mL microwave vial was loaded with  $\text{Pd}(\text{OAc})_2$  (45 mg, 0.20 mmol, 0.1 equiv.), iodobenzene (**81**) (0.25 mL, 2.2 mmol, 1.1 equiv.), dimethyl 2-phenylcycloprop-2-ene-1,1-dicarboxylate (**7**) (0.464 g, 2.00 mmol, 1.0 equiv.) and  $\text{K}_2\text{CO}_3$  (0.691 g, 5.00 mmol, 2.5 equiv.) under nitrogen atmosphere. DMF (2.0 mL) was added, and the reaction mixture was stirred at 30 °C for 18 hours. The reaction mixture was filtered through a short column of silica gel eluting with  $\text{Et}_2\text{O}$ , and the obtained ethereal solution was washed subsequently with a sat.  $\text{NH}_4\text{Cl}$  solution (15 mL), water (15 mL), and brine (15 mL). Combined organic layers were then dried over  $\text{Na}_2\text{SO}_4$ , filtered and concentrated under reduced pressure. The crude residue was purified by column chromatography ( $\text{SiO}_2$ , Pentane:EtOAc 97:3 to 90:10) affording the title compound **82** (228 mg, 0.738 mmol, 37 % yield) as a pale yellow solid.  $^1\text{H}$  NMR (400 MHz,  $\text{CHCl}_3$ - $d$ )  $\delta$  7.78 – 7.71 (m, 4H, ArH), 7.52 – 7.46 (m, 4H, ArH), 7.46 – 7.42 (m, 2H, ArH), 3.73 (s, 6H,  $\text{OCH}_3$ );  $^{13}\text{C}$  NMR (101 MHz,  $\text{CHCl}_3$ - $d$ )  $\delta$  170.9, 130.3,

130.1, 129.2, 125.4, 106.6, 52.5, 35.1. The characterization data correspond to the reported values.<sup>13</sup>

### 2-phenyl-3-propylcycloprop-2-ene-1,1-dicarbonitrile (**84**)

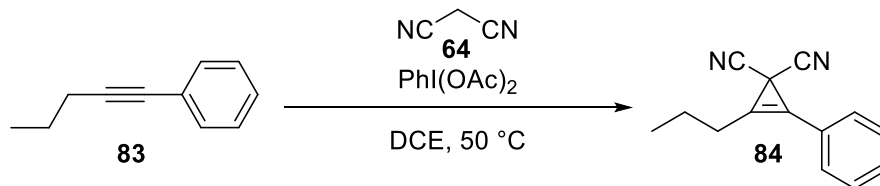

Following a reported procedure,<sup>7</sup>  $\text{PhI}(\text{OAc})_2$  (1.16 g, 3.60 mmol, 1.2 equiv.) and malonitrile (**64**) (238 mg, 3.60 mmol, 1.2 equiv.) were charged in a 25 mL microwave vial. Then pent-1-yn-1-ylbenzene (**83**) (0.22 mL, 2.0 mmol, 1.0 equiv.) and DCE (12.0 mL) were added, and the resulting solution was stirred at 50 °C. After 3 hours, the reaction mixture was cooled to room temperature, quenched with water (25 mL), and extracted with DCM (3 x 20 mL). The combined organic layers were evaporated under reduced pressure. The crude residue was purified by column chromatography ( $\text{SiO}_2$ , Pentane:EtOAc 95:5) affording the title compound **84** (212 mg, 1.02 mmol, 34 % yield) as an orange oil.  $^1\text{H}$  NMR (400 MHz, Chloroform-*d*)  $\delta$  = 7.61 (m, 2H, ArH), 7.55 (m, 3H, ArH), 2.82 (t,  $J$  = 7.28, 2H,  $\text{CH}_2\text{CH}_2\text{CH}_3$ ), 1.90 (h,  $J$  = 7.35, 2H,  $\text{CH}_2\text{CH}_2\text{CH}_3$ ), 1.13 (t,  $J$  = 7.40, 3H,  $\text{CH}_2\text{CH}_2\text{CH}_3$ );  $^{13}\text{C}$  NMR (101 MHz, Chloroform-*d*)  $\delta$  131.8, 129.5, 129.3, 121.7, 116.5, 106.1, 104.1, 26.1, 20.2, 13.8, 5.2. The characterization data correspond to the reported values.<sup>7</sup>

### 1-(3,3-Difluorocycloprop-1-en-1-yl)-4-(trifluoromethyl)benzene (**85**)

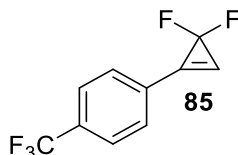

Following the general procedure B, starting from 1-ethynyl-4-(trifluoromethyl)benzene (0.41 mL, 2.5 mmol, 1.0 equiv.), the title compound **85** was obtained after purification by column chromatography ( $\text{SiO}_2$ , Pentane:Et<sub>3</sub>N 96:4) as a brown oil (201 mg, 0.913 mmol, 37 % yield).  $R_f$  0.38 (Pentane:Et<sub>3</sub>N 96:4);  $^1\text{H}$  NMR (400 MHz, Chloroform-*d*)  $\delta$  7.81 – 7.73 (m, 4H, ArH), 7.65 (t,  $J$  = 1.6 Hz, 1H, C=CH);  $^{13}\text{C}$  NMR (101 MHz, Chloroform-*d*)  $\delta$  133.4 (q,  $J$  = 32.7 Hz), 133.2 (t,  $J$  = 10.8 Hz), 130.5, 126.8, 126.3 (q,  $J$  = 3.8 Hz), 123.7 (q,  $J$  = 272.5 Hz), 116.6 (t,  $J$  = 12.2 Hz), 101.1 (t,  $J$  = 271.0 Hz);  $^{19}\text{F}$  NMR (376 MHz, Chloroform-*d*)  $\delta$  -63.1, -106.6; IR  $\tilde{\nu}_{\text{max}}$  1721 (w), 1410 (m), 1325 (s), 1305 (s), 1292 (s), 1175 (s), 1129 (s), 1064 (s), 1030 (s), 1020 (s), 972 (w), 851 (m), 823 (s), 789 (m), 780 (m), 735 (m); HRMS (APPI) calcd for  $\text{C}_{10}\text{H}_5\text{F}_4^+$  [ $\text{M}^+$ ] 201.0322; found 201.0321.

<sup>13</sup> D. C. Horwell, V. Sabin, **2000**, US Patent: US6020519.

### 1-(3,3-Difluorocycloprop-1-en-1-yl)-3-methylbenzene (**86**)

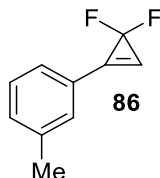

Following the general procedure B, starting from 1-ethynyl-3-methylbenzene (0.26 mL, 2.0 mmol, 1.0 equiv.), the title compound **86** was obtained after purification by column chromatography (SiO<sub>2</sub>, Pentane:Et<sub>3</sub>N 95:5) as a brown oil (260 mg, 1.57 mmol, 78 % yield). *R<sub>f</sub>* 0.43 (Pentane:Et<sub>3</sub>N 96:4); <sup>1</sup>H NMR (400 MHz, Chloroform-*d*) δ 7.47 (d, *J* = 7.6 Hz, 2H, Ar*H*), 7.43 (t, *J* = 1.7 Hz, 1H, C=CH), 7.37 (td, *J* = 7.3, 1.2 Hz, 1H, Ar*H*), 7.31 (d, *J* = 7.6 Hz, 1H, Ar*H*), 2.41 (s, 3H, CH<sub>3</sub>); <sup>13</sup>C NMR (101 MHz, Chloroform-*d*) δ 139.1, 134.2 (t, *J* = 10.4 Hz), 132.6, 130.9, 129.1, 127.4, 123.4, 113.3 (t, *J* = 12.3 Hz), 102.0 (t, *J* = 269.9 Hz), 21.3; <sup>19</sup>F NMR (376 MHz, Chloroform-*d*) δ -106.4; IR  $\tilde{\nu}_{\text{max}}$  3134 (w), 2928 (w), 2862 (w), 1717 (w), 1604 (w), 1584 (w), 1484 (w), 1463 (w), 1305 (s), 1188 (w), 1021 (s), 890 (w), 811 (m); HRMS (ESI) calcd for C<sub>10</sub>H<sub>8</sub>F<sub>2</sub> [M<sup>+</sup>] 166.0589; found 166.0593.

### 1-(3,3-Difluorocycloprop-1-en-1-yl)-3-nitrobenzene (**87**)

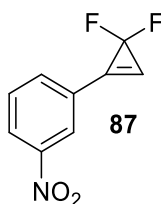

Following the general procedure B, starting from 1-ethynyl-3-nitrobenzene (0.29 g, 2.0 mmol, 1.0 equiv.), the title compound **87** was obtained after purification by column chromatography (SiO<sub>2</sub>, Pentane:Et<sub>3</sub>N 96:4 to Pentane:Et<sub>3</sub>N:EtOAc 90:5:5) as a brown solid (171 mg, 0.866 mmol, 43 % yield). *R<sub>f</sub>* 0.32 (Pentane:Et<sub>3</sub>N:EtOAc 90:5:5); *m.p.* = 41-44 °C; <sup>1</sup>H NMR (400 MHz, Chloroform-*d*) δ 8.51 (t, *J* = 1.9 Hz, 1H, C=CH), 8.37 (ddd, *J* = 8.4, 2.3, 1.1 Hz, 1H, Ar*H*), 7.98 (dt, *J* = 7.7, 1.3 Hz, 1H, Ar*H*), 7.76 – 7.67 (m, 2H, Ar*H*); <sup>13</sup>C NMR (101 MHz, Chloroform-*d*) δ 148.8, 135.7, 132.5 (t, *J* = 11.2 Hz), 130.5, 126.2, 125.1, 124.9, 117.3 (t, *J* = 12.2 Hz), 100.7 (t, *J* = 271.6 Hz); <sup>19</sup>F NMR (376 MHz, Chloroform-*d*) δ -106.4; IR  $\tilde{\nu}_{\text{max}}$  3133 (w), 3092 (w), 1723 (w), 1613 (w), 1530 (s), 1474 (w), 1434 (w), 1356 (s), 1305 (s), 1283 (s), 1031 (s), 892 (w), 818 (m), 790 (m), 747 (s), 735 (s), 675 (m); HRMS (APPI) calcd for C<sub>9</sub>H<sub>5</sub>F<sub>2</sub>NO<sub>2</sub><sup>+</sup> [M<sup>+</sup>] 197.0288; found 197.0231.

### 1-(3,3-difluorocycloprop-1-en-1-yl)-2-methoxybenzene (**88**)

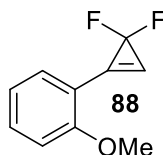

Following the general procedure B, starting from 1-ethynyl-2-methoxybenzene (0.26 mL, 2.0 mmol, 1.0 equiv.), the title compound **88** was obtained after purification by column chromatography (SiO<sub>2</sub>, Pentane:Et<sub>3</sub>N 90:10) as a brown oil (317 mg, 1.74 mmol, 87 % yield). **R<sub>f</sub>** 0.35 (Pentane:Et<sub>3</sub>N 96:4); **<sup>1</sup>H NMR (400 MHz, Chloroform-*d*)** δ 7.58 (dd, *J* = 7.6, 1.7 Hz, 1H, Ar*H*), 7.48 (ddd, *J* = 8.3, 7.5, 1.8 Hz, 1H, Ar*H*), 7.41 (t, *J* = 2.0 Hz, 1H, C=CH), 7.04 (td, *J* = 7.5, 1.0 Hz, 1H, Ar*H*), 6.98 (d, *J* = 8.4 Hz, 1H, Ar*H*), 3.94 (s, 3H, OCH<sub>3</sub>); **<sup>13</sup>C NMR (101 MHz, Chloroform-*d*)** δ 159.5, 133.5, 132.1, 130.2 (t, *J* = 10.5 Hz), 120.8, 113.9 (t, *J* = 12.2 Hz), 112.7, 111.2, 101.4 (t, *J* = 269.9 Hz), 55.9; **<sup>19</sup>F NMR (376 MHz, Chloroform-*d*)** δ -105.3; **IR**  $\tilde{\nu}_{\text{max}}$  1722 (w), 1599 (m), 1490 (m), 1469 (w), 1305 (s), 1273 (s), 1173 (w), 1018 (s), 826 (m), 785 (m), 755 (s), 728 (w); **HRMS (APPI)** calcd for C<sub>10</sub>H<sub>8</sub>F<sub>2</sub>O<sup>+</sup> [*M*<sup>+</sup>] 182.0538; found 182.0540.

### 3-(3,3-Difluorocycloprop-1-en-1-yl)thiophene (**89**)

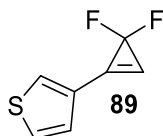

Following the general procedure B, starting from 1-ethynyl-2-methoxybenzene (0.20 mL, 2.0 mmol, 1.0 equiv.), the title compound **89** was obtained after purification by column chromatography (SiO<sub>2</sub>, Pentane:Et<sub>3</sub>N 96:4) as a brown oil (225 mg, 1.42 mmol, 71 % yield). **<sup>1</sup>H NMR (400 MHz, Chloroform-*d*)** δ 7.81 (d, *J* = 1.7 Hz, 1H, HetAr*H*), 7.43 (dd, *J* = 5.0, 2.9 Hz, 1H, HetAr*H*), 7.35 (dd, *J* = 5.1, 1.2 Hz, 1H, HetAr*H*), 7.28 (t, *J* = 1.8 Hz, 1H, C=CH); **<sup>13</sup>C NMR (101 MHz, Chloroform-*d*)** δ 130.9 (t, *J* = 1.4 Hz), 128.3 (t, *J* = 10.5 Hz), 127.8, 127.2, 124.4, 110.8 (t, *J* = 12.4 Hz), 100.9 (t, *J* = 269.8 Hz). The characterization data correspond to the reported values.<sup>10</sup>

### 2-(3,3-Difluorocycloprop-1-en-1-yl)naphthalene (**90**)

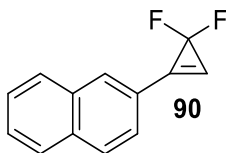

Following the general procedure B, starting from 2-ethynylnaphthalene (0.30 g, 2.0 mmol, 1.0 equiv.), the title compound **90** was obtained after purification by column chromatography (SiO<sub>2</sub>, Pentane:Et<sub>3</sub>N 95:5) as a light brown solid (379 mg, 1.87 mmol, 94 % yield). **R<sub>f</sub>** 0.28 (Pentane:Et<sub>3</sub>N 96:4); **m.p.** = 46-48 °C; **<sup>1</sup>H NMR (400 MHz, Chloroform-*d*)** δ 8.19 (s, 1H, C=CH), 7.96 – 7.91 (m, 2H, Ar*H*), 7.91 – 7.86 (m, 1H, Ar*H*), 7.69 (dd, *J* = 8.5, 1.7 Hz, 1H, Ar*H*), 7.63 – 7.53 (m, 3H, Ar*H*); **<sup>13</sup>C NMR (101 MHz, Chloroform-*d*)** δ 134.7, 134.2 (t, *J* = 10.6 Hz), 133.1, 131.4, 129.2, 128.9, 128.3, 128.1, 127.2, 126.0, 120.7, 113.8 (t, *J* = 12.3 Hz), 102.0 (t, *J* = 270.2 Hz); **<sup>19</sup>F NMR (376 MHz, Chloroform-*d*)** δ -106.4; **IR**  $\tilde{\nu}_{\text{max}}$  3130 (w), 3060 (w), 1716 (w), 1631 (w), 1462 (w), 1289 (s), 1196 (w), 1139 (w), 1014 (s), 893 (w), 862 (w), 809 (m), 787 (m), 766 (m), 675 (w); **HRMS (APPI)** calcd for C<sub>13</sub>H<sub>8</sub>F<sub>2</sub><sup>+</sup> [*M*<sup>+</sup>] 202.0589; found 202.0592.

## 2.3 Synthesis of Cyclopropylanilines

**General procedure C:** Synthesis of cyclopropylanilines.

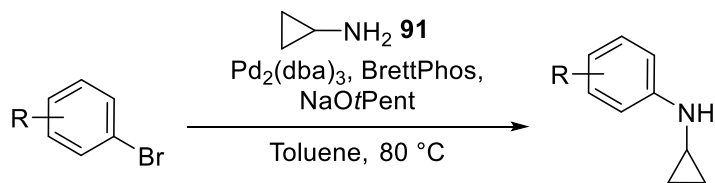

Following a modified procedure,<sup>14</sup> an oven-dried microwave vial was charged with  $\text{Pd}_2(\text{dba})_3$  (1 mol%) and BrettPhos (3 mol%). The vial was sealed, evacuated and back-filled with nitrogen (3 times). Then toluene (0.5 M), cyclopropylamine (**91**) (1.6 equiv.), the aromatic bromide (1 equiv.) and NaOtPent (45% solution in toluene, 1.5 equiv.) were added via syringe to the vial and it was heated at 80 °C for 18 h. The reaction mixture was then cooled to room temperature, diluted with  $\text{Et}_2\text{O}$ , and filtered through a small pad of silica gel. The filtrate was evaporated under reduced pressure, and the obtained crude residue was subjected to column chromatography with the indicated solvents.

### N-Cyclopropylaniline (**9**)

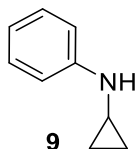

Following the general procedure C, starting from bromobenzene (3.16 mL, 30.0 mmol, 1.0 equiv.), the title compound **9** was obtained after purification by column chromatography ( $\text{SiO}_2$ , Pentane:EtOAc 97:3) as a pale yellow oil (3.40 g, 25.5 mmol, 85 % yield). **<sup>1</sup>H NMR (400 MHz, Chloroform-*d*)**  $\delta$  7.24 – 7.15 (m, 2H, ArH), 6.84 – 6.77 (m, 2H, ArH), 6.77 – 6.70 (m, 1H, ArH), 4.21 (bs, 1H, NH), 2.43 (tt,  $J = 6.7, 3.6$  Hz, 1H, NHCH), 0.77 – 0.70 (m, 2H,  $\text{CH}_2$ ), 0.56 – 0.49 (m, 2H,  $\text{CH}_2$ ); **<sup>13</sup>C NMR (101 MHz, Chloroform-*d*)**  $\delta$  148.8, 129.2, 117.9, 113.3, 25.4, 7.5. The characterization data correspond to the reported values.<sup>15</sup>

### 4-Chloro-N-cyclopropylaniline (**92**)

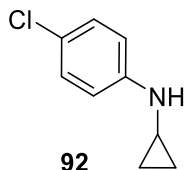

Following the general procedure C, starting from 1-bromo-4-chlorobenzene (383 mg, 2.00 mmol, 1.0 equiv.), the title compound **92** was obtained after purification by column chromatography ( $\text{SiO}_2$ , Pentane:EtOAc 97:3) as a yellow oil (221 mg, 1.32 mmol, 66 % yield). **<sup>1</sup>H NMR (400**

<sup>14</sup> S. Maity, M. Zhu, R. S. Shinabery, N. Zheng, *Angew. Chem. Int. Ed.* **2012**, 51, 222 –226.

<sup>15</sup> T. V. Nykaza, J. Yang, A. T. Radosevich, *Tetrahedron* **2019**, 75, 3248–3252.

**MHz, Chloroform-*d***)  $\delta$  7.17 – 7.09 (m, 2H, ArH), 6.75 – 6.66 (m, 2H, ArH), 2.40 (tt,  $J$  = 6.7, 3.5 Hz, 1H, NHCH), 0.77 – 0.70 (td,  $J$  = 6.7, 4.7 Hz, 2H, CH<sub>2</sub>), 0.53 – 0.46 (td,  $J$  = 6.7, 4.7 Hz, 2H, CH<sub>2</sub>); **<sup>13</sup>C NMR (101 MHz, Chloroform-*d*)**  $\delta$  147.3, 129.1, 122.5, 114.4, 25.5, 7.6. The characterization data correspond to the reported values.<sup>16</sup>

#### ***N*-Cyclopropyl-4-methylaniline (93)**

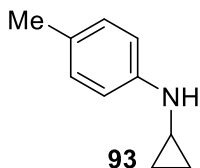

Following the general procedure C, starting from 1-bromo-4-methylbenzene (0.37 mL, 3.0 mmol, 1.0 equiv.), the title compound **93** was obtained after purification by column chromatography (SiO<sub>2</sub>, Pentane:EtOAc 97:3) as a yellow oil (242 mg, 1.64 mmol, 55 % yield). **<sup>1</sup>H NMR (400 MHz, Chloroform-*d*)**  $\delta$  7.04 – 6.98 (d,  $J$  = 8.2 Hz, 2H, ArH), 6.76 – 6.69 (d,  $J$  = 8.2 Hz, 2H, ArH), 4.14 (brs, 1H, NH), 2.41 (tt,  $J$  = 6.7, 3.6 Hz, 1H, NHCH), 2.26 (s, 3H, CH<sub>3</sub>), 0.75 – 0.67 (m, 2H, CH<sub>2</sub>), 0.55 – 0.46 (m, 2H, CH<sub>2</sub>); **<sup>13</sup>C NMR (101 MHz, Chloroform-*d*)**  $\delta$  146.4, 129.7, 127.1, 113.4, 25.7, 20.6, 7.5. The characterization data correspond to the reported values.<sup>17</sup>

#### ***N*-Cyclopropyl-4-methoxyaniline (94)**

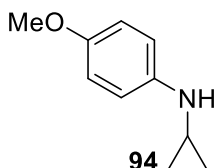

Following the general procedure C, starting from 1-bromo-4-methoxybenzene (0.25 mL, 2.0 mmol, 1.0 equiv.), the title compound **94** was obtained after purification by column chromatography (SiO<sub>2</sub>, Pentane:EtOAc 97:3) as a yellow oil (248 mg, 1.52 mmol, 76 % yield). **<sup>1</sup>H NMR (400 MHz, Chloroform-*d*)**  $\delta$  6.84 – 6.72 (m, 4H, ArH), 4.22 (bs, 1H, NH), 3.76 (s, 3H, OCH<sub>3</sub>), 2.40 (tt,  $J$  = 6.7, 3.6 Hz, 1H, NHCH), 0.70 (m, 2H, CH<sub>2</sub>), 0.54 – 0.48 (m, 2H, CH<sub>2</sub>); **<sup>13</sup>C NMR (101 MHz, Chloroform-*d*)**  $\delta$  152.6, 142.8, 114.9, 114.5, 56.0, 26.2, 7.4. The characterization data correspond to the reported values.<sup>18</sup>

<sup>16</sup> R. N. Loeppky, S. Elomari, *J. Org. Chem.* **2000**, 65, 96-103.

<sup>17</sup> Y. Kuang, Y. Ning, J. Zhu, Y. Wang, *Org. Lett.* **2018**, 20, 2693–2697.

<sup>18</sup> T. H. Nguyen, S. Maity, N. Zheng, *Beilstein J. Org. Chem.* **2014**, 10, 975–980.

### ***N*-cyclopropyl-3-methoxyaniline (95)**

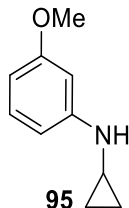

Following the general procedure C, starting from 1-bromo-3-methoxybenzene (0.38 mL, 3.0 mmol, 1.0 equiv.), the title compound **95** was obtained after purification by column chromatography (SiO<sub>2</sub>, Pentane:EtOAc 97:3) as a white solid (434 mg, 2.66 mmol, 89 % yield). **<sup>1</sup>H NMR (400 MHz, Chloroform-*d*)**  $\delta$  7.13 – 7.05 (m, 1H, ArH), 6.42 – 6.35 (m, 2H, ArH), 6.34 – 6.28 (m, 1H, ArH), 3.79 (s, 3H, OCH<sub>3</sub>), 2.42 (tt, *J* = 6.7, 3.6 Hz, 1H, NHCH), 0.76 – 0.69 (m, 2H, CH<sub>2</sub>), 0.59 – 0.51 (m, 2H, CH<sub>2</sub>); **<sup>13</sup>C NMR (101 MHz, Chloroform-*d*)**  $\delta$  160.7, 150.2, 129.8, 106.3, 102.6, 99.0, 54.8, 25.1, 7.3. The characterization data correspond to the reported values.<sup>17</sup>

### **3-Bromo-*N*-cyclopropylaniline (96)**

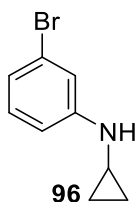

Following the general procedure C, starting from 1,3-dibromobenzene (0.30 mL, 2.5 mmol, 1.0 equiv.), the title compound **96** was obtained after purification by column chromatography (SiO<sub>2</sub>, Pentane:EtOAc 50:50) as a yellow oil (142 mg, 0.670 mmol, 27 % yield). **<sup>1</sup>H NMR (400 MHz, Chloroform-*d*)**  $\delta$  7.02 (t, *J* = 8.0 Hz, 1H, ArH), 6.95 (t, *J* = 2.1 Hz, 1H, ArH), 6.85 (ddd, *J* = 7.8, 1.9, 1.0 Hz, 1H, ArH), 6.66 (ddd, *J* = 8.2, 2.3, 1.0 Hz, 1H, ArH), 4.32 (bs, 1H, NH), 2.41 (tt, *J* = 6.7, 3.5 Hz, 1H, NHCH), 0.79 – 0.71 (m, 2H, CH<sub>2</sub>), 0.55 – 0.48 (m, 2H, CH<sub>2</sub>); **<sup>13</sup>C NMR (101 MHz, Chloroform-*d*)**  $\delta$  150.0, 130.5, 123.3, 120.7, 115.8, 112.2, 25.2, 7.6. The characterization data correspond to the reported values.<sup>17</sup>

### ***N*-Cyclopropylpyridin-3-amine (97)**

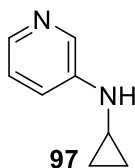

Following the general procedure C, starting from 3-bromopyridine (0.24 mL, 2.5 mmol, 1.0 equiv.), the title compound **97** was obtained after purification by column chromatography (SiO<sub>2</sub>, Pentane:EtOAc 50:50) as a yellow oil (206 mg, 1.54 mmol, 61 % yield). **<sup>1</sup>H NMR (400 MHz,**

**Chloroform-*d***)  $\delta$  8.18 – 8.10 (m, 1H, ArH), 7.99 (dd,  $J$  = 3.7, 2.4 Hz, 1H, ArH), 7.13 – 7.04 (m, 2H, ArH), 4.23 (bs, 1H, NH), 2.43 (tt,  $J$  = 6.7, 3.5 Hz, 1H, NHCH), 0.82 – 0.72 (m, 2H, CH<sub>2</sub>), 0.55 – 0.48 (m, 2H, CH<sub>2</sub>); **<sup>13</sup>C NMR (101 MHz, Chloroform-*d*)**  $\delta$  144.8, 139.2, 136.2, 123.8, 119.4, 25.0, 7.6. The characterization data correspond to the reported values.<sup>19</sup>

#### ***N*-Cyclopropyl-3,5-bis(trifluoromethyl)aniline (98)**

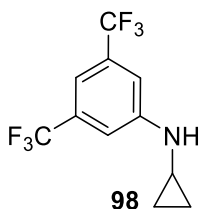

Following the general procedure C, starting from 1-bromo-3,5-bis(trifluoromethyl)benzene (0.35 mL, 2.0 mmol, 1.0 equiv.), the title compound **98** was obtained after purification by column chromatography (SiO<sub>2</sub>, Pentane:EtOAc 97:3) as a white solid (310 mg, 1.15 mmol, 58 % yield). **<sup>1</sup>H NMR (400 MHz, Chloroform-*d*)**  $\delta$  7.18 (m, 1H, ArH), 7.11 (m, 2H, ArH), 2.48 (tt,  $J$  = 6.7, 3.6 Hz, 1H, NHCH), 0.88 – 0.80 (m, 2H, CH<sub>2</sub>), 0.59 – 0.52 (m, 2H, CH<sub>2</sub>); **<sup>13</sup>C NMR (101 MHz, Chloroform-*d*)**  $\delta$  149.4, 132.4 (q,  $J$  = 32.7 Hz), 123.7 (q,  $J$  = 272.4 Hz), 112.6 – 112.1 (m), 110.8 (dt,  $J$  = 8.0, 4.2 Hz), 25.0, 7.8. The characterization data correspond to the reported values.<sup>17</sup>

#### ***N*-cyclopropylnaphthalen-1-amine (99)**

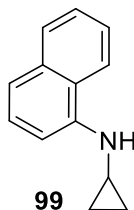

Following the general procedure C, starting from 1-bromonaphthalene (0.28 mL, 2.0 mmol, 1.0 equiv.), the title compound **99** was obtained after purification by column chromatography (SiO<sub>2</sub>, Pentane:EtOAc 98:2) as a white solid (328 mg, 1.79 mmol, 89 % yield). **<sup>1</sup>H NMR (400 MHz, Chloroform-*d*)**  $\delta$  7.83 – 7.77 (m, 1H, ArH), 7.76 – 7.70 (m, 1H, ArH), 7.49 – 7.37 (m, 3H, ArH), 7.29 (d,  $J$  = 8.2 Hz, 1H, ArH), 7.08 (dd,  $J$  = 7.6, 1.1 Hz, 1H, ArH), 4.89 (bs, 1H, NH), 2.59 (tt,  $J$  = 6.8, 3.6 Hz, 1H, NHCH), 0.90 – 0.81 (m, 2H, CH<sub>2</sub>), 0.69 – 0.62 (m, 2H, CH<sub>2</sub>); **<sup>13</sup>C NMR (101 MHz, Chloroform-*d*)**  $\delta$  144.0, 134.3, 128.8, 126.7, 125.8, 124.8, 123.3, 119.8, 117.9, 106.0, 25.6, 7.7. The characterization data correspond to the reported values.<sup>19,20</sup>

<sup>19</sup> W. Cui, R. N. Loeppky, *Tetrahedron* **2001**, 57, 2953-2956.

<sup>20</sup> Our obtained signals were slightly shifted from the reported ones.



### ***N*-Cyclopropyl-4-methoxy-2-methylaniline (100)**

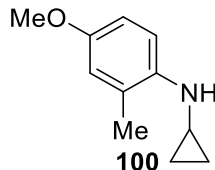

Following the general procedure C, starting from 1-bromo-4-methoxy-2-methylbenzene (0.28 mL, 2.0 mmol, 1.0 equiv.), the title compound **100** was obtained after purification by column chromatography (SiO<sub>2</sub>, Pentane:EtOAc 97:3) as a yellow oil (250 mg, 1.41 mmol, 71 % yield). **R<sub>f</sub>** 0.25 (Pentane:EtOAc 95:5); **<sup>1</sup>H NMR (400 MHz, Chloroform-*d*)**  $\delta$  6.99 (d, *J* = 8.6, 1H, Ar*H*), 6.74 (dd, *J* = 8.6, 3.0, 1H, Ar*H*), 6.69 (d, *J* = 2.9, 1H, Ar*H*), 3.76 (s, 3H, OCH<sub>3</sub>), 2.41 (tt, *J* = 6.7, 3.6, 1H, NHCH), 2.10 (s, 3H, CH<sub>3</sub>), 0.77 – 0.70 (m, 2H, CH<sub>2</sub>), 0.56 – 0.49 (m, 2H, CH<sub>2</sub>); **<sup>13</sup>C NMR (101 MHz, Chloroform-*d*)**  $\delta$  152.1, 141.0, 123.5, 116.9, 112.1, 111.7, 56.0, 26.0, 17.7, 7.5; **IR  $\tilde{\nu}_{\text{max}}$**  3398 (w), 2996 (w), 2951 (w), 2830 (w), 1667 (w), 1612 (w), 1509 (s), 1455 (m), 1365 (m), 1284 (m), 1233 (s), 1208 (m), 1161 (m), 1050 (m), 852 (w), 805 (w); **HRMS (ESI)** calcd for C<sub>11</sub>H<sub>16</sub>NO<sup>+</sup> [M+H]<sup>+</sup> 178.1226; found 178.1227.

### ***N*-Cyclopropyl-4-methoxy-2,6-dimethylaniline (37)**

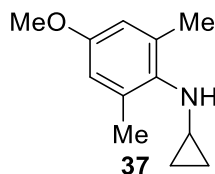

Following the general procedure C, starting from 2-bromo-5-methoxy-1,3-dimethylbenzene (1.8 g, 8.5 mmol, 1.0 equiv.), the title compound **37** was obtained after purification by column chromatography (SiO<sub>2</sub>, Pentane:EtOAc 97:3) as a yellow oil (1.38 g, 7.19 mmol, 85 % yield). **R<sub>f</sub>** 0.3 (Pentane:EtOAc 95:5); **<sup>1</sup>H NMR (400 MHz, Chloroform-*d*)**  $\delta$  6.57 (s, 2H, Ar*H*), 3.75 (s, 3H, OCH<sub>3</sub>), 2.49 (tt, *J* = 6.8, 3.8 Hz, 1H, NHCH), 2.29 (s, 6H, CH<sub>3</sub>), 0.62 – 0.53 (td, *J* = 6.8, 4.7 Hz, 2H, CH<sub>2</sub>), 0.53 – 0.45 (td, *J* = 6.8, 4.7 Hz, 2H, CH<sub>2</sub>); **<sup>13</sup>C NMR (101 MHz, Chloroform-*d*)**  $\delta$  154.5, 139.1, 131.1, 114.0, 55.5, 30.7, 19.6, 8.4; **IR  $\tilde{\nu}_{\text{max}}$**  3365 (w), 2995 (w), 2947 (m), 2833 (w), 1609 (m), 1489 (s), 1358 (w), 1316 (m), 1256 (m), 1203 (m), 1149 (s), 1065 (s), 1019 (w), 999 (w), 855 (m), 836 (m); **HRMS (ESI)** calcd for C<sub>12</sub>H<sub>17</sub>NO [M]<sup>+</sup> 191.1305; found 191.1308.

### 3. Synthesis of Organic Dyes

#### 2,4,5,6-Tetra(9*H*-carbazol-9-yl)isophthalonitrile (4CzIPN, **103**)

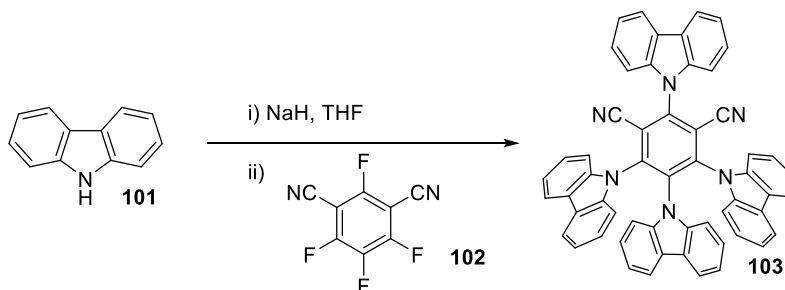

Following a reported procedure,<sup>21</sup> sodium hydride (60% suspension in mineral oil, 0.60 g, 15 mmol, 7.5 equiv), was added slowly to a stirred solution of 9*H*-carbazole (**101**) (1.67 g, 10.0 mmol, 5.00 equiv) in dry THF (40 mL) under a nitrogen atmosphere at room temperature. After 45 min, 2,4,5,6-tetrafluoroisophthalonitrile (**102**) (0.40 g, 2.0 mmol, 1.0 equiv.) was added portionwise. After stirring at room temperature for 15 hours, 2 mL of water were added to the reaction mixture to quench the excess of NaH. The resulting mixture was then concentrated under reduced pressure. The obtained residue was purified by recrystallization from hexane/CH<sub>2</sub>Cl<sub>2</sub> (1:1, 90 mL) affording the crude product as a yellow powder. Further purification by column chromatography (SiO<sub>2</sub>, Pentane:DCM 50:50 to 40:60) afforded the title compound **103** as a bright yellow crystalline solid (1.14 g, 1.45 mmol, 73 % yield). <sup>1</sup>H NMR (400 MHz, Chloroform-*d*) δ 8.2 (d, *J* = 7.7 Hz, 2H, Ar*H*), 7.8 – 7.6 (m, 8H, Ar*H*), 7.5 (ddd, *J* = 8.0, 6.6, 1.6 Hz, 2H, Ar*H*), 7.3 (d, *J* = 7.5 Hz, 2H, Ar*H*), 7.2 (dd, *J* = 8.4, 1.5 Hz, 4H, Ar*H*), 7.2 – 7.0 (m, 8H, Ar*H*), 6.8 (t, *J* = 7.8 Hz, 4H, Ar*H*), 6.6 (td, *J* = 7.6, 1.2 Hz, 2H, Ar*H*). <sup>13</sup>C NMR (101 MHz, Chloroform-*d*) δ 145.2, 144.6, 140.0, 138.2, 136.9, 134.7, 127.0, 125.8, 124.9, 124.7, 124.5, 123.8, 122.4, 121.9, 121.4, 121.0, 120.4, 119.6, 116.3, 111.6, 109.9, 109.5, 109.4. The characterization data correspond to the reported values.<sup>21</sup>

#### 2,4,5,6-Tetrakis(diphenylamino)isophthalonitrile (4DPAIPN, **105**)

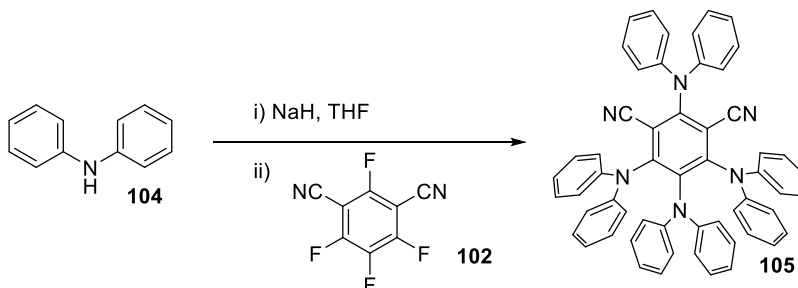

Following a slightly modified procedure,<sup>21</sup> sodium hydride (60% suspension in mineral oil, 0.65 g, 16 mmol, 8.0 equiv), was added slowly to a stirred solution diphenylamine (**104**) (2.03 g, 12.0 mmol, 6 equiv.) in dry DMF (20 mL). The resulting suspension was heated to 50 °C for 1 h. Then 2,4,5,6-tetrafluoroisophthalonitrile (**102**) (0.40 g, 2.0 mmol, 1.0 equiv.) was added portionwise,

<sup>21</sup> M. Garreau, F. Le Vaillant, J. Waser, *Angew. Chem. Int. Ed.* **2019**, 58, 8182–8186.

and the resulting reaction mixture was stirred at 50 °C for 4 h, and then at room temperature for 15 h. Water (5 mL) was added to quench the excess NaH, and the precipitate was filtered and purified by recrystallization from hexane/CH<sub>2</sub>Cl<sub>2</sub> (1:2, 100 mL) to afford the title compound **105** as an orange crystalline solid (877 mg, 1.10 mmol, 55 % yield). **<sup>1</sup>H NMR (400 MHz, Chloroform-*d*)** δ 7.32 – 7.22 (m, 4H, ArH), 7.12 – 7.05 (m, 12H, ArH), 7.07 – 6.98 (m, 2H, ArH), 6.96 – 6.84 (m, 8H, ArH), 6.73 – 6.63 (m, 10H, ArH), 6.56 (d, J = 7.4 Hz, 4H, ArH). **<sup>13</sup>C NMR (101 MHz, Chloroform-*d*)** δ 154.2, 151.7, 145.5, 144.6, 143.1, 140.3, 129.4, 128.6, 127.5, 124.2, 123.9, 122.9, 122.6, 122.6, 121.1, 113.1, 113.0. The characterization data correspond to the reported values.<sup>21</sup>

## 4. Preliminary Attempts at the Lewis-Acid Catalysed [3+2] Annulation

### 4.1 Synthesis of the Donor-Acceptor Cyclopropane

#### Dimethyl 2-(1,3-dioxoisindolin-2-yl)cyclopropane-1,1-dicarboxylate (**8**)

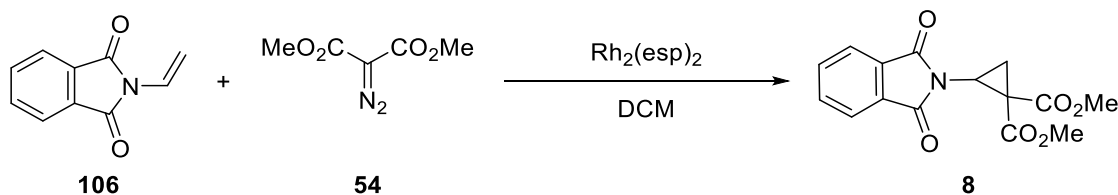

Following a modified procedure,<sup>22</sup> bis[rhodium( $\alpha,\alpha',\alpha',\alpha'$ -tetramethyl-1,3-benzenedipropionic acid)] (11 mg, 0.014 mmol, 0.1 mol%) was weighted in the glovebox. The flask was closed with a septum and put under N<sub>2</sub> atmosphere. A solution of *N*-vinyl-phthalimide (**106**) (2.5 g, 14 mmol, 1 equiv) in 30 mL of dry dichloromethane was added and the resulting green suspension was cooled down to 0 °C with an ice/water bath. A solution of dimethyl-2-diazomalonate (**54**) (2.5 g, 15 mmol, 1.1 equiv) in dichloromethane (20 mL) was then added over five minutes. When the addition was complete, the reaction was allowed to warm to room temperature. After 5 hours at room temperature, the solvent was removed under reduced pressure and the obtained crude residue was purified by column chromatography (SiO<sub>2</sub>, Hexane:EtOAc 90:10 to 70:30) to afford compound **8** (3.4 g, 11 mmol, 78% yield) as a colorless solid. <sup>1</sup>H NMR (400 MHz, Chloroform-*d*)  $\delta$  7.86 (m, 2H, Phth), 7.75 (m, 2H, Phth), 3.85 (s, 3H, OCH<sub>3</sub>), 3.72 (dd, 1H, *J* = 8.5, 6.6 Hz, NCH), 3.64 (s, 3H, OCH<sub>3</sub>), 2.73 (dd, 1H, *J* = 6.5, 6.5 Hz, CH<sub>2</sub>), 2.06 (dd, 1H, *J* = 8.5, 6.4 Hz, CH<sub>2</sub>); <sup>13</sup>C NMR (101 MHz, Chloroform-*d*)  $\delta$  168.5, 167.8, 166.9, 134.3, 131.4, 123.5, 53.1, 53.0, 34.9, 33.1, 19.6. The characterization data is corresponding to the reported values.<sup>22</sup>

### 4.2 Preliminary Cycloaddition Attempts

General method for the lewis acid catalyzed annulation:

A 5 mL microwave vial was charged in a glove box with the Lewis acid (10 mol%). The vial was sealed and put under N<sub>2</sub> atmosphere. A solution of 2-phenylcycloprop-2-ene-1,1-dicarboxylate (**7**) (23 mg, 0.10 mmol, 1.0 equiv.) and dimethyl 2-(1,3-dioxoisindolin-2-yl)cyclopropane-1,1-dicarboxylate (**8**) (36 mg, 0.12 mmol, 1.2 equiv.) in DCM was then added. The resulting reaction mixture was left stirring overnight at the indicated temperature. The reaction mixture was then filtered through a small pad of silica gel eluting with EtOAc, and the filtrate was concentrated under reduced pressure.

<sup>22</sup> F. Gonzalez-Bobes, M. D. B. Fenster, S. Kiau, L. Kolla, S. Kolotuchin, M. Soumeillant, *Adv. Synth. Catal.* **2008**, 350, 813-816.

**Table S1: [3+2] cycloaddition with donor-acceptor aminocyclopropane 8**

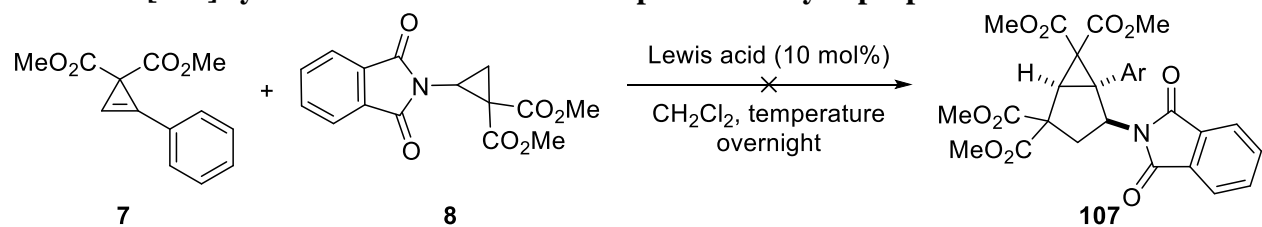

| Entry | Lewis acid           | Dilution | Temperature | Outcome         |
|-------|----------------------|----------|-------------|-----------------|
| 1     | Yb(OTf) <sub>3</sub> | 1 M      | RT          | Complex mixture |
| 2     | Hf(OTf) <sub>4</sub> | 0.1 M    | RT          | Complex mixture |
| 3     | SnCl <sub>4</sub>    | 0.1 M    | -78 °C      | Complex mixture |

## 5. Optimizations

General method for the optimization:

A 2 mL test tube was charged with the photocatalyst, the cyclopropene (0.1 mmol, 1 equiv.) and the cyclopropylaniline. The tube was sealed, evacuated and back-filled with nitrogen (3 times). Then degassed solvent (3 freeze pump thaw cycles) was added via syringe and the resulting mixture was irradiated at room temperature for 18 h with Blue LEDs, positioned at 4 to 5 cm of the reaction vessel. The reaction mixture was then filtered through a small pad of silica gel eluting with Et<sub>2</sub>O, and the filtrate was concentrated under reduced pressure. The obtained crude residue was then subjected to preparative TLC, leading to the isolation of the desired cycloadduct.

**Table S2: Optimization of the general [3+2] cycloaddition**

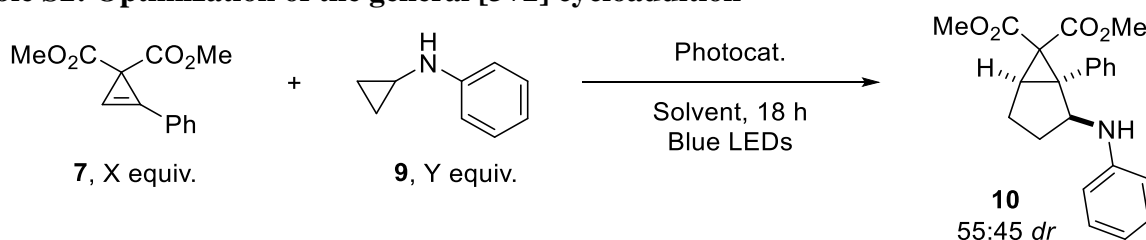

| Entry | X   | Y   | Photocat. (mol %)                                        | Solvent [M]                           | Isolated Yield          |
|-------|-----|-----|----------------------------------------------------------|---------------------------------------|-------------------------|
| 1     | 2.5 | 1.0 | Ru(bpz) <sub>3</sub> (PF <sub>6</sub> ) <sub>2</sub> (2) | CH <sub>3</sub> NO <sub>2</sub> [0.1] | 52%                     |
| 2     | 1.0 | 1.2 | Ru(bpz) <sub>3</sub> (PF <sub>6</sub> ) <sub>2</sub> (2) | CH <sub>3</sub> NO <sub>2</sub> [0.1] | 49%                     |
| 3     | 1.0 | 1.2 | Ru(bpz) <sub>3</sub> (PF <sub>6</sub> ) <sub>2</sub> (2) | CH <sub>3</sub> CN [0.1]              | 38%                     |
| 4     | 1.0 | 1.2 | Ru(bpz) <sub>3</sub> (PF <sub>6</sub> ) <sub>2</sub> (2) | MeOH [0.1]                            | 28%                     |
| 5     | 1.0 | 1.2 | Ru(bpz) <sub>3</sub> (PF <sub>6</sub> ) <sub>2</sub> (2) | DMF [0.1]                             | 11%                     |
| 6     | 1.0 | 1.2 | Ru(bpz) <sub>3</sub> (PF <sub>6</sub> ) <sub>2</sub> (2) | THF [0.1]                             | 24%                     |
| 7     | 1.0 | 1.2 | Ru(bpz) <sub>3</sub> (PF <sub>6</sub> ) <sub>2</sub> (2) | DCE [0.1]                             | 32%                     |
| 8     | 1.0 | 1.5 | Ru(bpz) <sub>3</sub> (PF <sub>6</sub> ) <sub>2</sub> (2) | CH <sub>3</sub> NO <sub>2</sub> [0.1] | 53%                     |
| 9     | 1.0 | 1.5 | 4CzIPn (5)                                               | CH <sub>3</sub> NO <sub>2</sub> [0.1] | 60%                     |
| 10    | 1.0 | 1.5 | 4CzIPn (5)                                               | CH <sub>3</sub> NO <sub>2</sub> [0.2] | 70%                     |
| 11    | 1.0 | 1.5 | 4CzIPn (5)                                               | CH <sub>3</sub> NO <sub>2</sub> [0.4] | 82%                     |
| 12    | 1.0 | 1.8 | 4CzIPn (5)                                               | CH <sub>3</sub> NO <sub>2</sub> [0.4] | 86%                     |
| 13    | 1.0 | 1.8 | 4DPAIPN (5)                                              | CH <sub>3</sub> NO <sub>2</sub> [0.4] | 87% (87% <sup>a</sup> ) |
| 14    | 1.0 | 1.8 | [Ir(dtbbpy)(ppy) <sub>2</sub> ][PF <sub>6</sub> ] (2)    | CH <sub>3</sub> NO <sub>2</sub> [0.4] | 85%                     |
| 15    | 1.0 | 2.5 | [Ir(dtbbpy)(ppy) <sub>2</sub> ][PF <sub>6</sub> ] (2)    | CH <sub>3</sub> NO <sub>2</sub> [0.4] | 89%                     |

<sup>a</sup>Isolated yield on 0.3 mmol.

**Table S3: Optimization of the diastereoselective [3+2] cycloaddition**

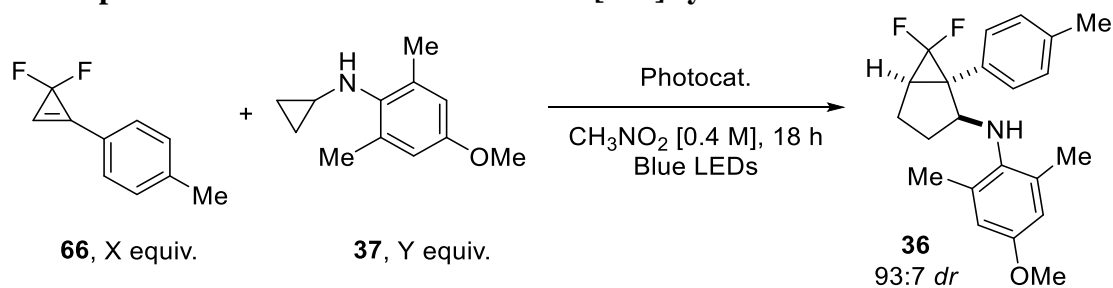

| Entry | X   | Y   | Photocat. (mol %)                                                      | Isolated Yield |
|-------|-----|-----|------------------------------------------------------------------------|----------------|
| 1     | 1.0 | 1.8 | 4CzIPn (5)                                                             | 54%            |
| 2     | 2.5 | 1.0 | 4CzIPn (5)                                                             | 47%            |
| 3     | 1.0 | 1.8 | Ru(bpy) <sub>3</sub> (PF <sub>6</sub> ) <sub>2</sub> (2)               | 52%            |
| 4     | 1.0 | 1.8 | [Ir(dF-CF <sub>3</sub> -ppy) <sub>2</sub> (dtbbpy)]PF <sub>6</sub> (2) | 57%            |
| 5     | 2.5 | 1.0 | 4CzIPn (5)                                                             | 56%            |
| 6     | 1.8 | 1.0 | Ir(ppy) <sub>3</sub> (2)                                               | 26%            |
| 7     | 1.8 | 1.0 | DCA (5)                                                                | 9%             |
| 8     | 1.8 | 1.0 | Ru(bpz) <sub>3</sub> (PF <sub>6</sub> ) <sub>2</sub> (2)               | 32%            |
| 9     | 1.8 | 1.0 | Rose Bengal (5)                                                        | 39%            |
| 10    | 1.8 | 1.0 | DPAIPN (5)                                                             | 60% (57%)      |
| 11    | 1.8 | 1.0 | [Ir(dtbbpy)(ppy) <sub>2</sub> ][PF <sub>6</sub> ] (2)                  | 64%            |
| 12    | 2.5 | 1.0 | DPAIPN (5)                                                             | 67%            |
| 13    | 2.5 | 1.0 | [Ir(dtbbpy)(ppy) <sub>2</sub> ][PF <sub>6</sub> ] (2)                  | 72% (73%)      |

<sup>a</sup>Isolated yield on 0.3 mmol.

## 6. Photoredox Mediated [3+2] Cycloaddition

### General procedure D

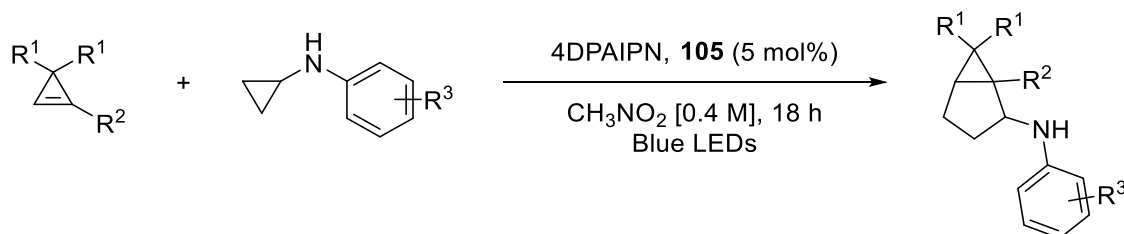

A 5 mL test tube was charged with 2,4,5,6-tetrakis(diphenylamino)isophthalonitrile (4-DPAIPN, **105**) (12 mg, 0.015 mmol, 0.05 equiv.), the cyclopropene (0.30 mmol, 1.0 equiv.) and the cyclopropylamine (0.54 mmol, 1.8 equiv.). The tube was sealed, evacuated and back-filled with nitrogen (3 times). Then 0.75 mL of degassed nitromethane (3 freeze pump thaw cycles) was added via syringe and the resulting mixture was irradiated at room temperature for 18 hours with Blue LEDs, positioned at 4 to 5 cm of the reaction vessel. The reaction mixture was then filtered through a small pad of silica gel eluting with Et<sub>2</sub>O, and the filtrate was concentrated under reduced pressure. The obtained crude residue was then subjected to column chromatography using the indicated solvents.

### General procedure E

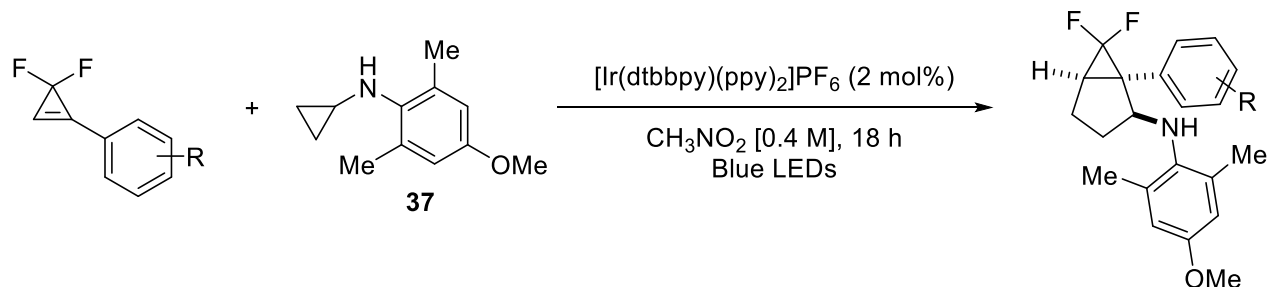

A 5 mL test tube was charged with [Ir(dtbbpy)(ppy)<sub>2</sub>](PF<sub>6</sub>) (5.5 mg, 6.0 μmol, 0.02 equiv.), the difluorocyclopropene (0.30 mmol, 1.0 equiv.) and *N*-cyclopropyl-4-methoxy-2,6-dimethylaniline (**37**) (0.14 g, 0.75 mmol, 2.5 equiv.). The tube was sealed, evacuated and back-filled with nitrogen (3 times). Then 0.75 mL of degassed nitromethane (3 freeze pump thaw cycles) was added via syringe and the resulting mixture was irradiated at room temperature for 18 hours with Blue LEDs, positioned at 4 to 5 cm of the reaction vessel. The reaction mixture was then filtered through a small pad of silica gel eluting with Et<sub>2</sub>O, and the filtrate was concentrated under reduced pressure. The obtained crude residue was then subjected to column chromatography using the indicated solvents.

The stereochemistry of the major diastereoisomer for the cycloadducts was assigned by analogy with compound **10a**, for which product modification led to **50**, confirming its proposed relative configuration. The stereochemistry of the minor diastereoisomer was assigned by analogy with compound **16b**, for which a crystal structure could be obtained by X-Ray diffraction.



### Dimethyl 1-phenyl-2-(phenylamino)bicyclo[3.1.0]hexane-6,6-dicarboxylate (**10**)

Following the general procedure D, starting from dimethyl 2-phenylcycloprop-2-ene-1,1-dicarboxylate (**7**) (70 mg, 0.30 mmol, 1.0 equiv.) and *N*-cyclopropylaniline (**9**) (72 mg, 0.54 mmol, 1.8 equiv.), the title compound **10** (55:45 *dr* in the crude  $^1\text{H}$  NMR) was obtained as a separable mixture of two diastereoisomers after purification by column chromatography on Biotage (SNAP cartridge KP-SIL 25 g, Pentane:Et<sub>2</sub>O 95:5 to 90:10).

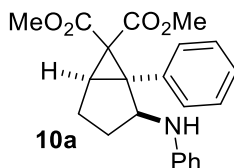

**10a**, major diastereoisomer, colorless oil (52 mg, 0.14 mmol, 47 % yield). *R<sub>f</sub>* 0.35 (Pentane:Et<sub>2</sub>O 80:20);  $^1\text{H}$  NMR (400 MHz, Chloroform-*d*)  $\delta$  7.33 - 7.27 (m, 2H, Ar*H*), 7.24 - 7.14 (m, 3H, Ar*H*), 7.05 - 6.99 (m, 2H, Ar*H*), 6.55 (t, *J* = 7.3 Hz, 1H, Ar*H*), 6.45 (d, *J* = 7.4 Hz, 2H, Ar*H*), 5.23 (d, *J* = 10.4 Hz, 1H, NH), 4.42 (td, *J* = 10.3, 9.7, 7.0 Hz, 1H, CHNH), 3.86 (s, 3H, OCH<sub>3</sub>), 3.41 (s, 3H, OCH<sub>3</sub>), 2.65 (d, *J* = 4.6 Hz, 1H, CHCH<sub>2</sub>), 2.35 - 2.12 (m, 3H, NHCHCH<sub>2</sub> and NHCHCH<sub>2</sub>CH<sub>2</sub>), 0.96 - 0.84 (m, 1H, NHCHCH<sub>2</sub>);  $^{13}\text{C}$  NMR (101 MHz, Chloroform-*d*)  $\delta$  170.1, 167.8, 148.2, 137.8, 129.1, 129.0, 128.3, 127.4, 116.9, 113.2, 63.5, 53.4, 52.8, 50.5, 42.0, 34.8, 28.1, 24.5; IR  $\tilde{\nu}_{\text{max}}$  3383 (w), 3055 (w), 3028 (w), 2955 (w), 1731 (s), 1602 (s), 1511 (s), 1436 (m), 1313 (s), 1236 (s), 1196 (m), 1124 (m), 1076 (m), 1011 (w), 934 (w); HRMS (ESI) calcd for C<sub>22</sub>H<sub>24</sub>NO<sub>4</sub><sup>+</sup> [M+H]<sup>+</sup> 366.1700; found 366.1700.

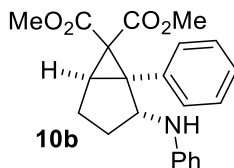

**10b**, minor diastereoisomer, colorless oil (44 mg, 0.12 mmol, 40 % yield). *R<sub>f</sub>* 0.25 (Pentane:Et<sub>2</sub>O 80:20);  $^1\text{H}$  NMR (400 MHz, Chloroform-*d*)  $\delta$  7.41 - 7.35 (m, 1H, Ar*H*), 7.36 - 7.28 (m, 2H, Ar*H*), 7.26 - 7.21 (m, 2H, Ar*H*), 7.11 - 7.02 (m, 2H, Ar*H*), 6.63 (t, *J* = 7.4 Hz, 1H, Ar*H*), 6.37 (d, *J* = 7.3 Hz, 2H, Ar*H*), 4.35 (d, *J* = 5.7 Hz, 1H, CHNH), 3.88 (s, 3H, OCH<sub>3</sub>), 3.52 (bs, 1H, NH), 3.36 (s, 3H, OCH<sub>3</sub>), 2.92 (d, *J* = 4.3 Hz, 1H, CHCH<sub>2</sub>), 2.41 - 2.28 (m, 1H, NHCHCH<sub>2</sub>CH<sub>2</sub>), 2.14 (dd, *J* = 13.5, 8.3 Hz, 1H, NHCHCH<sub>2</sub>CH<sub>2</sub>), 1.92 (dd, *J* = 14.9, 9.4 Hz, 1H, NHCHCH<sub>2</sub>), 1.46 - 1.33 (m, 1H, NHCHCH<sub>2</sub>);  $^{13}\text{C}$  NMR (101 MHz, Chloroform-*d*)  $\delta$  168.1, 167.4, 146.9, 134.8, 129.8, 129.1, 128.9, 128.0, 117.6, 113.5, 58.8, 53.1, 52.7, 51.0, 42.5, 36.5, 30.1, 24.8; IR  $\tilde{\nu}_{\text{max}}$  3407 (w), 3055 (w), 3028 (w), 2953 (w), 1735 (s), 1602 (s), 1504 (m), 1434 (m), 1315 (m), 1259 (s), 1211 (m), 1178 (m), 1121 (m), 1073 (w), 1013 (w); HRMS (ESI) calcd for C<sub>22</sub>H<sub>24</sub>NO<sub>4</sub><sup>+</sup> [M+H]<sup>+</sup> 366.1700; found 366.1698.

### Dibenzyl 1-phenyl-2-(phenylamino)bicyclo[3.1.0]hexane-6,6-dicarboxylate (**11**)

Following the general procedure D, starting from dibenzyl 2-phenylcycloprop-2-ene-1,1-dicarboxylate (**62**) (0.12 g, 0.30 mmol, 1.0 equiv.) and *N*-cyclopropylaniline (**9**) (72 mg, 0.54

mmol, 1.8 equiv.), the title compound **11** (58:42 *dr* in the crude  $^1\text{H}$  NMR) was obtained as a separable mixture of two diastereoisomers after purification by column chromatography on Biotage (SNAP cartridge KP-SIL 25 g, Pentane:Et<sub>2</sub>O 90:10 to 85:15).

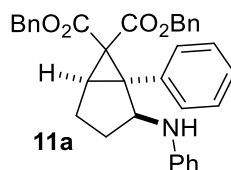

**11a**, major diastereoisomer, pale yellow oil (65 mg, 0.13 mmol, 42 % yield).  $R_f$  0.40 (Pentane:Et<sub>2</sub>O 80:20);  $^1\text{H}$  NMR (400 MHz, Chloroform-*d*)  $\delta$  7.39 – 7.33 (m, 5H, ArH), 7.29 – 7.24 (m, 5H, ArH), 7.16 (dp,  $J$  = 3.6, 2.0 Hz, 3H, ArH), 7.06 – 7.01 (m, 2H, ArH), 7.02 – 6.95 (m, 2H, ArH), 6.54 (t,  $J$  = 7.3 Hz, 1H, ArH), 6.32 (d,  $J$  = 7.3 Hz, 2H, ArH), 5.25 (app. d,  $J$  = 2.5 Hz, 2H, CH<sub>2</sub>Ph), 5.14 (d,  $J$  = 10.6 Hz, 1H, NH), 4.89 (d,  $J$  = 12.3 Hz, 1H, CH<sub>2</sub>Ph), 4.71 (d,  $J$  = 12.2 Hz, 1H, CH<sub>2</sub>Ph), 4.40 (td,  $J$  = 10.3, 7.4 Hz, 1H, CHNH), 2.65 (d,  $J$  = 4.2 Hz, 1H, CHCH<sub>2</sub>), 2.30 – 2.10 (m, 3H, NHCHCH<sub>2</sub> and NHCHCH<sub>2</sub>CH<sub>2</sub>), 0.89 (td,  $J$  = 7.5, 6.6, 3.7 Hz, 1H, NHCHCH<sub>2</sub>);  $^{13}\text{C}$  NMR (101 MHz, Chloroform-*d*)  $\delta$  169.3, 167.3, 148.1, 137.7, 135.2, 134.9, 129.1, 129.0, 128.9, 128.5, 128.3, 128.3, 127.3, 116.8, 113.2, 68.4, 67.5, 63.7, 50.7, 42.2, 35.0, 28.0, 24.5; 3 aromatic carbons were not resolved. IR  $\tilde{\nu}_{\text{max}}$  3385 (w), 3064 (w), 3031 (w), 2960 (w), 1729 (s), 1602 (m), 1513 (m), 1453 (w), 1401 (w), 1378 (w), 1312 (m), 1277 (m), 1254 (m), 1221 (s), 1187 (m), 1119 (m), 1075 (m), 911 (m); HRMS (ESI) calcd for C<sub>34</sub>H<sub>32</sub>NO<sub>4</sub><sup>+</sup> [M+H]<sup>+</sup> 518.2326; found 518.2332.

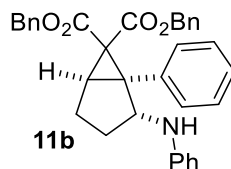

**11b**, minor diastereoisomer, pale yellow oil (62 mg, 0.12 mmol, 40 % yield).  $R_f$  0.35 (Pentane:Et<sub>2</sub>O 80:20);  $^1\text{H}$  NMR (400 MHz, Chloroform-*d*)  $\delta$  7.46 – 7.40 (m, 2H, ArH), 7.41 – 7.35 (m, 3H, ArH), 7.34 – 7.30 (m, 1H, ArH), 7.28 – 7.24 (m, 5H, ArH), 7.19 (tt,  $J$  = 7.1, 1.7, 1H, ArH), 7.13 (t,  $J$  = 7.5, 1H, ArH), 7.08 – 6.95 (m, 4H, ArH), 6.61 (t,  $J$  = 7.3, 1H, ArH), 6.24 (d,  $J$  = 7.5, 2H, ArH), 5.37 (d,  $J$  = 12.0, 1H, CH<sub>2</sub>Ph), 5.20 (d,  $J$  = 12.0, 1H, CH<sub>2</sub>Ph), 4.85 (d,  $J$  = 12.3, 1H, CH<sub>2</sub>Ph), 4.67 (d,  $J$  = 12.4, 1H, CH<sub>2</sub>Ph), 4.26 (d,  $J$  = 5.8, 1H, CHNH), 3.51 (bs, 1H, NH), 2.91 (d,  $J$  = 4.3, 1H, CHCH<sub>2</sub>), 2.34 – 2.21 (m, 1H, NHCHCH<sub>2</sub>CH<sub>2</sub>), 2.10 (dd,  $J$  = 13.5, 8.3, 1H, NHCHCH<sub>2</sub>CH<sub>2</sub>), 1.75 (dd,  $J$  = 14.9, 9.4, 1H, NHCHCH<sub>2</sub>), 1.31 – 1.26 (m, 1H, NHCHCH<sub>2</sub>);  $^{13}\text{C}$  NMR (101 MHz, Chloroform-*d*)  $\delta$  167.2, 166.9, 146.9, 135.4, 135.2, 134.6, 130.0, 129.7, 129.1, 129.0, 128.8, 128.7, 128.5, 128.2, 128.1, 128.0, 127.9, 117.5, 113.4, 67.8, 67.3, 58.8, 51.1, 42.6, 36.6, 29.9, 24.7. IR  $\tilde{\nu}_{\text{max}}$  3409 (w), 3057 (m), 3033 (m), 2960 (m), 2928 (m), 1731 (s), 1604 (s), 1500 (s), 1455 (m), 1430 (w), 1375 (w), 1309 (m), 1286 (s), 1257 (s), 1203 (s), 1180 (s), 1117 (s), 1071 (m), 1026 (w), 1003 (w), 982 (w), 907 (s); HRMS (ESI) calcd for C<sub>34</sub>H<sub>32</sub>NO<sub>4</sub><sup>+</sup> [M+H]<sup>+</sup> 518.2326; found 518.2327.

**Bis(2,2,2-trifluoroethyl) 1-phenyl-2-(phenylamino)bicyclo[3.1.0]hexane-6,6-dicarboxylate (12)**

Following the general procedure D, starting from bis(2,2,2-trifluoroethyl) 2-phenylcycloprop-2-ene-1,1-dicarboxylate (**63**) (0.11 g, 0.30 mmol, 1.0 equiv.) and *N*-cyclopropylaniline (**9**) (72 mg, 0.54 mmol, 1.8 equiv.), the title compound **12** (66:34 *dr* in the crude  $^1\text{H}$  NMR) was obtained as a separable mixture of two diastereoisomers after purification by column chromatography on Biotage (SNAP cartridge KP-SIL 25 g, Pentane:Et<sub>2</sub>O 90:10 to 85:15).

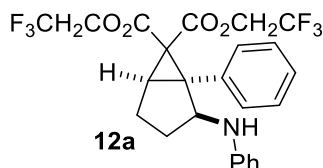

**12a**, major diastereoisomer, colorless oil (81 mg, 0.16 mmol, 54 % yield). *R<sub>f</sub>* 0.42 (Pentane:Et<sub>2</sub>O 80:20);  $^1\text{H}$  NMR (400 MHz, Chloroform-*d*)  $\delta$  7.31 – 7.27 (m, 2H, Ar*H*), 7.25 – 7.19 (m, 3H, Ar*H*), 7.07 – 6.99 (m, 2H, Ar*H*), 6.59 (t, *J* = 7.3 Hz, 1H, Ar*H*), 6.44 (d, *J* = 7.4 Hz, 2H, Ar*H*), 5.07 (bs, 1H, NH) 4.77 (dq, *J* = 12.6, 8.3 Hz, 1H, CH<sub>2</sub>CF<sub>3</sub>), 4.59 – 4.45 (m, 2H, CH<sub>2</sub>CF<sub>3</sub> and CHNH), 4.24 (dq, *J* = 12.7, 8.3 Hz, 1H, CH<sub>2</sub>CF<sub>3</sub>), 4.12 (dq, *J* = 12.6, 8.3 Hz, 1H, CH<sub>2</sub>CF<sub>3</sub>), 2.77 (d, *J* = 4.3 Hz, 1H, CHCH<sub>2</sub>), 2.40 – 2.28 (m, 2H, NHCHCH<sub>2</sub>CH<sub>2</sub> and NHCHCH<sub>2</sub>), 2.24 (dd, *J* = 12.6, 8.7 Hz, 1H, NHCHCH<sub>2</sub>CH<sub>2</sub>), 1.03 – 0.90 (m, 1H, NHCHCH<sub>2</sub>);  $^{13}\text{C}$  NMR (101 MHz, Chloroform-*d*)  $\delta$  167.7, 165.4, 147.8, 136.6, 129.2, 128.9, 128.6, 127.8, 122.8 (q, *J* = 277.1 Hz), 122.5 (q, *J* = 276.9 Hz), 117.2, 113.2, 63.7, 61.9 (q, *J* = 37.0 Hz), 61.3 (q, *J* = 37.2 Hz), 52.1, 41.4, 36.2, 28.0, 24.3;  $^{19}\text{F}$  NMR (376 MHz, Chloroform-*d*)  $\delta$  -73.4 (t, *J* = 8.3 Hz), -74.0 (t, *J* = 8.2 Hz); IR  $\tilde{\nu}_{\text{max}}$  3414 (w), 3064 (w), 3028 (w), 2972 (w), 1752 (m), 1602 (m), 1513 (m), 1442 (w), 1413 (m), 1286 (s), 1250 (m), 1219 (m), 1171 (s), 1119 (m), 1084 (w), 971 (m), 911 (m); HRMS (ESI) calcd for C<sub>24</sub>H<sub>22</sub>F<sub>6</sub>NO<sub>4</sub><sup>+</sup> [M+H]<sup>+</sup> 502.1448; found 502.1466.

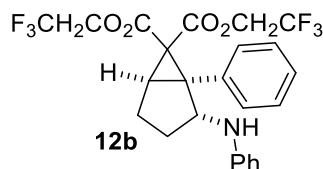

**12b**, minor diastereoisomer, colorless oil (36 mg, 0.072 mmol, 24 % yield). *R<sub>f</sub>* 0.36 (Pentane:Et<sub>2</sub>O 80:20);  $^1\text{H}$  NMR (400 MHz, Chloroform-*d*)<sup>23</sup>  $\delta$  7.38 – 7.30 (m, 3H, Ar*H*), 7.26 – 7.23 (m, 2H, Ar*H*), 7.13 – 7.03 (m, 2H, Ar*H*), 6.67 (t, *J* = 7.4 Hz, 1H, Ar*H*), 6.38 (d, *J* = 7.2 Hz, 2H, Ar*H*), 4.65 (qd, *J* = 8.4, 1.2 Hz, 2H, CH<sub>2</sub>CF<sub>3</sub>), 4.41 (d, *J* = 5.9 Hz, 1H, CHNH), 4.20 (dq, *J* = 12.6, 8.3 Hz, 1H, CH<sub>2</sub>CF<sub>3</sub>), 4.05 (dq, *J* = 12.6, 8.3 Hz, 1H, CH<sub>2</sub>CF<sub>3</sub>), 3.03 (d, *J* = 4.4 Hz, 1H, CHCH<sub>2</sub>), 2.50 – 2.37 (m, 1H, NHCHCH<sub>2</sub>CH<sub>2</sub>), 2.18 (dd, *J* = 13.8, 8.4 Hz, 1H, NHCHCH<sub>2</sub>CH<sub>2</sub>), 1.99 (dd, *J* = 15.2, 9.6 Hz, 1H, NHCHCH<sub>2</sub>), 1.46 (dddd, *J* = 14.8, 10.8, 8.5, 5.9 Hz, 1H, NHCHCH<sub>2</sub>);  $^{13}\text{C}$  NMR (101 MHz, Chloroform-*d*)  $\delta$  165.4, 165.0, 146.4, 133.6, 129.7, 129.2, 128.4, 128.3, 122.9 (q, *J* = 277.3), 122.4 (q, *J* = 277.3), 118.2, 113.7, 61.4 (q, *J* = 37.0 Hz), 61.3 (q, *J* = 37.1 Hz) 59.0, 52.4, 41.9, 37.8, 29.9, 24.8;  $^{19}\text{F}$  NMR (376 MHz, Chloroform-*d*)  $\delta$  -73.35 (t, *J* = 8.2 Hz), -74.03 (t, *J* = 8.2 Hz); IR  $\tilde{\nu}_{\text{max}}$  3407 (w), 3058 (w), 3030 (w), 2974 (w), 1754 (m),

<sup>23</sup> NH was not resolved.

1602 (m), 1502 (m), 1411 (w), 1288 (s), 1250 (m), 1167 (s), 1117 (m), 1080 (w), 1026 (w), 982 (m), 909 (w); **HRMS (ESI)** calcd for  $C_{24}H_{22}F_6NO_4^+$   $[M+H]^+$  502.1448; found 502.1454.

### 1-Phenyl-2-(phenylamino)bicyclo[3.1.0]hexane-6,6-dicarbonitrile (**13**)

Following the general procedure D, starting from 2-phenylcycloprop-2-ene-1,1-dicarbonitrile (**65**) (50 mg, 0.30 mmol, 1.0 equiv.) and *N*-cyclopropylaniline (**9**) (72 mg, 0.54 mmol, 1.8 equiv.), the title compound **13** (70:30 *dr* in the crude  $^1H$  NMR) was obtained as a separable mixture of two diastereoisomers after purification by column chromatography on Biotage (SNAP cartridge KP-SIL 25 g, Pentane:Et<sub>2</sub>O 90:10 to 70:30).

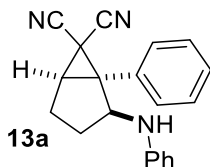

**13a**, major diastereoisomer, brown oil (46 mg, 0.15 mmol, 51 % yield). **R<sub>f</sub>** 0.44 (Pentane:Et<sub>2</sub>O 65:35);  $^1H$  NMR (400 MHz, Chloroform-*d*)  $\delta$  7.44 – 7.39 (m, 2H, ArH), 7.38 – 7.33 (m, 3H, ArH), 7.07 – 6.99 (m, 2H, ArH), 6.67 (t, *J* = 7.4 Hz, 1H, ArH), 6.34 (d, *J* = 7.6 Hz, 2H, ArH), 4.65 (q, *J* = 9.3 Hz, 1H, CHNH), 4.09 (d, *J* = 9.1 Hz, 1H, NH), 2.79 (d, *J* = 3.5 Hz, 1H, CHCH<sub>2</sub>), 2.56 – 2.41 (m, 3H, NHCHCH<sub>2</sub> and NHCHCH<sub>2</sub>CH<sub>2</sub>), 1.90 – 1.79 (m, 1H, NHCHCH<sub>2</sub>);  $^{13}C$  NMR (101 MHz, Chloroform-*d*)  $\delta$  146.8, 133.9, 129.5, 129.3, 128.9, 118.6, 114.7, 113.6, 113.6, 63.6, 55.9, 42.0, 30.1, 24.9, 12.9; **IR**  $\tilde{\nu}_{max}$  3405 (m), 2970 (s), 2900 (s), 2245 (m), 1638 (s), 1603 (s), 1498 (s), 1441 (m), 1400 (s), 1315 (m), 1262 (s), 1175 (m), 1071 (s), 914 (s), 739 (s), 698 (s); **HRMS (ESI)** calcd for  $C_{20}H_{18}N_3^+$   $[M+H]^+$  300.1495; found 300.1503.

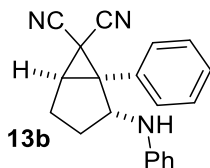

**13b**, minor diastereoisomer, brown oil (22 mg, 0.073 mmol, 25 % yield). **R<sub>f</sub>** 0.32 (Pentane:Et<sub>2</sub>O 65:35);  $^1H$  NMR (400 MHz, Chloroform-*d*)<sup>23</sup>  $\delta$  7.43 (dd, *J* = 4.3, 1.8 Hz, 5H, ArH), 7.18 – 7.11 (m, 2H, ArH), 6.76 (t, *J* = 7.4 Hz, 1H, ArH), 6.45 (d, *J* = 7.4 Hz, 2H, ArH), 4.46 (dd, *J* = 6.7, 2.0 Hz, 1H, CHNH), 3.06 (d, *J* = 4.7 Hz, 1H, CHCH<sub>2</sub>), 2.68 – 2.55 (m, 1H, NHCHCH<sub>2</sub>CH<sub>2</sub>), 2.45 (dtd, *J* = 15.1, 8.7, 6.6 Hz, 1H, NHCHCH<sub>2</sub>CH<sub>2</sub>), 2.31 (ddd, *J* = 14.3, 8.9, 2.4 Hz, 1H, NHCHCH<sub>2</sub>), 2.11 (ddt, *J* = 15.1, 10.8, 2.4 Hz, 1H, NHCHCH<sub>2</sub>);  $^{13}C$  NMR (101 MHz, Chloroform-*d*)  $\delta$  145.7, 130.9, 130.1, 129.5, 129.4, 119.0, 114.0, 113.3, 113.1, 58.6, 55.3, 42.1, 31.8, 25.2, 15.9; **IR**  $\tilde{\nu}_{max}$  3395 (w), 3058 (w), 2932 (w), 2249 (m), 1603 (s), 1498 (s), 1439 (w), 1313 (m), 1258 (w), 1178 (w), 1031 (w), 912 (m), 737 (s), 694 (s); **HRMS (ESI)** calcd for  $C_{20}H_{18}N_3^+$   $[M+H]^+$  300.1495; found 300.1499.

## 6,6-Difluoro-*N*-phenyl-1-(*p*-tolyl)bicyclo[3.1.0]hexan-2-amine (14)

Following the general procedure D, starting from 1-(3,3-difluorocycloprop-1-en-1-yl)-4-methylbenzene (**66**) (50 mg, 0.30 mmol, 1.0 equiv.) and *N*-cyclopropylaniline (**9**) (72 mg, 0.54 mmol, 1.8 equiv.), the title compound **14** (68:32 *dr* in the crude  $^1\text{H}$  NMR) was obtained as a separable mixture of two diastereoisomers after purification by column chromatography on Biotage (SNAP cartridge KP-SIL 25 g, Pentane:Et<sub>2</sub>O 98:2 to 95:5).

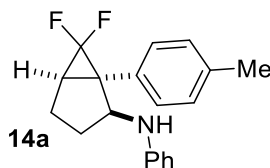

**14a**, major diastereoisomer, pale brown oil (56 mg, 0.19 mmol, 62 % yield).  $R_f$  0.40 (Pentane:Et<sub>2</sub>O 95:5);  $^1\text{H}$  NMR (400 MHz, Chloroform-*d*)<sup>23</sup>  $\delta$  7.16 (d,  $J$  = 8.1 Hz, 2H, ArH), 7.04 – 6.96 (m, 4H, ArH), 6.57 (t,  $J$  = 7.4 Hz, 1H, ArH), 6.42 (d,  $J$  = 7.7 Hz, 2H, ArH), 4.44 (td,  $J$  = 8.9, 6.2 Hz, 1H, CHNH), 2.44 – 2.32 (m, 1H, CF<sub>2</sub>CHCH<sub>2</sub>), 2.29 – 2.18 (m, 5H, CF<sub>2</sub>CHCH<sub>2</sub>, NHCHCH<sub>2</sub> and CH<sub>3</sub>), 2.09 (dd,  $J$  = 14.4, 5.0 Hz, 1H, CHCF<sub>2</sub>), 1.54 – 1.43 (m, 1H, NHCHCH<sub>2</sub>);  $^{13}\text{C}$  NMR (101 MHz, Chloroform-*d*)<sup>24</sup>  $\delta$  147.5, 137.3, 132.1, 129.3, 128.7, 117.8, 116.8 (dd,  $J$  = 303.4, 281.6 Hz), 113.7, 63.9, 44.5 (dd,  $J$  = 11.7, 8.5 Hz), 33.6 (dd,  $J$  = 12.3, 9.0 Hz), 31.3 (d,  $J$  = 7.4 Hz), 24.5, 21.3;  $^{19}\text{F}$  NMR (376 MHz, Chloroform-*d*)  $\delta$  -124.7 (dd,  $J$  = 161.0, 14.8 Hz), -138.5 (d,  $J$  = 160.4 Hz); IR  $\tilde{\nu}_{\text{max}}$  3418 (w), 3025 (w), 2953 (m), 1733 (w), 1603 (s), 1511 (s), 1447 (s), 1315 (m), 1280 (m), 1245 (m), 1196 (s), 1155 (m), 1060 (m), 984 (s), 918 (m), 813 (m), 748 (s), 694 (m); HRMS (ESI) calcd for C<sub>19</sub>H<sub>20</sub>F<sub>2</sub>N<sup>+</sup> [M+H]<sup>+</sup> 300.1558; found 300.1559.

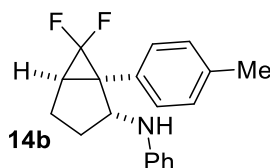

**14b**, minor diastereoisomer, pale brown oil (23 mg, 0.077 mmol, 26 % yield).  $R_f$  0.35 (Pentane:Et<sub>2</sub>O 95:5);  $^1\text{H}$  NMR (400 MHz, Chloroform-*d*)<sup>23</sup>  $\delta$  7.16 (d,  $J$  = 1.3 Hz, 4H, ArH), 7.14 – 7.09 (m, 2H, ArH), 6.69 (t,  $J$  = 7.3 Hz, 1H, ArH), 6.46 (d,  $J$  = 7.8 Hz, 2H, ArH), 4.22 (d,  $J$  = 4.4 Hz, 1H, CHNH), 2.42 (dd,  $J$  = 14.2, 5.3 Hz, 1H, CHCF<sub>2</sub>), 2.37 – 2.29 (m, 4H, CH<sub>3</sub> and CF<sub>2</sub>CHCH<sub>2</sub>), 2.15 – 1.99 (m, 3H, CF<sub>2</sub>CHCH<sub>2</sub> and NHCHCH<sub>2</sub>);  $^{13}\text{C}$  NMR (101 MHz, Chloroform-*d*)  $\delta$  146.6, 138.0, 129.6, 129.5, 129.3, 128.9, 118.0, 115.5 (dd,  $J$  = 305.0, 276.3 Hz), 113.7, 57.6, 46.2 – 45.7 (m), 32.5 (dd,  $J$  = 11.4, 9.4 Hz), 31.8 (d,  $J$  = 9.7 Hz), 24.0, 21.3;  $^{19}\text{F}$  NMR (376 MHz, Chloroform-*d*)  $\delta$  -125.5 (ddd,  $J$  = 158.3, 14.4, 4.9 Hz), -141.3 (d,  $J$  = 158.3 Hz); IR  $\tilde{\nu}_{\text{max}}$  3405 (w), 3031 (w), 2932 (w), 2878 (w), 1602 (s), 1503 (s), 1431 (s), 1321 (m), 1251 (m), 1208 (m), 1082 (w), 993 (m), 923 (m), 820 (w), 752 (s), 690 (m); HRMS (ESI) calcd for C<sub>19</sub>H<sub>20</sub>F<sub>2</sub>N<sup>+</sup> [M+H]<sup>+</sup> 300.1558; found 300.1561.

<sup>24</sup> One carbon was not resolved.

### 5',5'-Dimethyl-*N*-phenyl-1-(*p*-tolyl)spiro[bicyclo[3.1.0]hexane-6,2'-[1,3]dioxan]-2-amine (15)

Following the general procedure D, starting from 6,6-dimethyl-1-(*p*-tolyl)-4,8-dioxaspiro[2.5]oct-1-ene (**70**) (69 mg, 0.30 mmol, 1.0 equiv.) and *N*-cyclopropylaniline (**9**) (72 mg, 0.54 mmol, 1.8 equiv.), the title compound **15** (> 95:5 *dr* in the crude  $^1\text{H}$  NMR, putative minor diastereoisomer could not be detected) was obtained as a single diastereoisomer after purification by column chromatography on Biotage (SNAP cartridge KP-SIL 25 g, Pentane:Et<sub>2</sub>O 98:2 to 95:5), and as a pale yellow oil (49 mg, 0.14 mmol, 45 % yield).

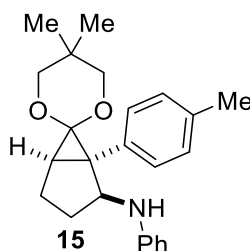

**R<sub>f</sub>** 0.55 (Pentane:Et<sub>2</sub>O 90:10);  $^1\text{H}$  NMR (400 MHz, Chloroform-*d*)  $\delta$  7.31 (d,  $J$  = 8.1 Hz, 2H, ArH), 7.14 – 7.05 (m, 4H, ArH), 6.64 (t,  $J$  = 7.3 Hz, 1H, ArH), 6.57 (d,  $J$  = 7.3 Hz, 2H, ArH), 4.53 – 4.35 (m, 2H, CHNH & NH), 3.73 (d,  $J$  = 10.6 Hz, 1H, OCH<sub>2</sub>), 3.61 (d,  $J$  = 10.6 Hz, 1H, OCH<sub>2</sub>), 3.57 – 3.46 (m, 2H, OCH<sub>2</sub>), 2.45 – 2.35 (m, 1H, CH), 2.31 (s, 3H, C<sub>Ar</sub>-CH<sub>3</sub>), 2.28 – 2.19 (m, 1H, NHCHCH<sub>2</sub>CH<sub>2</sub>), 2.13 (dd,  $J$  = 13.5, 9.0 Hz, 1H, NHCHCH<sub>2</sub>CH<sub>2</sub>), 1.89 (d,  $J$  = 5.3 Hz, 1H, NHCHCH<sub>2</sub>), 1.69 – 1.56 (m, 1H, NHCHCH<sub>2</sub>), 1.29 (s, 3H, CH<sub>3</sub>), 0.82 (s, 3H, CH<sub>3</sub>);  $^{13}\text{C}$  NMR (101 MHz, Chloroform-*d*)  $\delta$  148.5, 136.1, 135.5, 129.1, 128.8, 128.7, 116.8, 113.5, 94.1, 76.9, 76.3, 63.4, 46.0, 34.5, 32.5, 31.0, 25.4, 23.0, 22.1, 21.3; IR  $\tilde{\nu}_{\text{max}}$  3399 (w), 3050 (w), 3026 (w), 2952 (m), 2863 (m), 1906 (w), 1601 (m), 1504 (m), 1464 (w), 1392 (w), 1308 (w), 1278 (w), 1241 (w), 1143 (m), 1115 (m), 1062 (m), 1012 (m), 969 (w), 908 (s), 811 (m), 728 (s), 691 (m), 646 (w); HRMS (ESI) calcd for C<sub>24</sub>H<sub>29</sub>NNaO<sub>2</sub><sup>+</sup> [M + Na]<sup>+</sup> 386.2090; found 386.2094.

### Dimethyl 1-(4-(*tert*-butyl)phenyl)-2-(phenylamino)bicyclo[3.1.0]hexane-6,6-dicarboxylate (16)

Following the general procedure D, starting from dimethyl 2-(4-(*tert*-butyl)phenyl)cycloprop-2-ene-1,1-dicarboxylate (**71**) (78 mg, 0.30 mmol, 1.0 equiv.) and *N*-cyclopropylaniline (**9**) (72 mg, 0.54 mmol, 1.8 equiv.), the title compound **16** (54:46 *dr* in the crude  $^1\text{H}$  NMR) was obtained as a separable mixture of two diastereoisomers after purification by column chromatography on Biotage (SNAP cartridge KP-SIL 25 g, Pentane:Et<sub>2</sub>O 95:5 to 90:10).

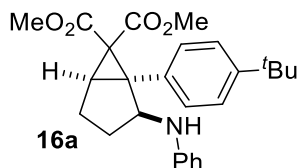

**16a**, major diastereoisomer, pale yellow oil (61 mg, 0.15 mmol, 48 % yield). **R<sub>f</sub>** 0.38 (Pentane:Et<sub>2</sub>O 80:20);  $^1\text{H}$  NMR (400 MHz, Chloroform-*d*)<sup>23</sup>  $\delta$  7.20 – 7.14 (m, 4H, ArH), 7.06 – 7.00 (m, 2H, ArH), 6.59 (t,  $J$  = 7.3 Hz, 1H, ArH), 6.50 (d,  $J$  = 7.9 Hz, 2H, ArH), 4.42 (dd,  $J$  =

10.1, 8.0 Hz, 1H, CHNH), 3.87 (s, 3H, OCH<sub>3</sub>), 3.41 (s, 3H, OCH<sub>3</sub>), 2.63 (d, *J* = 4.5 Hz, 1H, CHCH<sub>2</sub>), 2.36 – 2.16 (m, 3H, NHCHCH<sub>2</sub> and NHCHCH<sub>2</sub>CH<sub>2</sub>), 1.24 (s, 9H, <sup>t</sup>Bu), 0.95 – 0.87 (m, 1H, NHCHCH<sub>2</sub>); <sup>13</sup>C NMR (101 MHz, Chloroform-*d*) δ 170.3, 167.7, 150.0, 147.5, 134.5, 129.1, 128.5, 125.1, 117.5, 113.9, 64.0, 53.4, 52.8, 49.9, 42.2, 34.9, 34.6, 31.4, 28.0, 24.5; IR  $\tilde{\nu}_{\text{max}}$  3386 (w), 3028 (w), 2964 (m), 2875 (w), 1732 (s), 1604 (s), 1521 (s), 1438 (m), 1310 (s), 1246 (s), 1144 (m), 1010 (w), 908 (s), 735 (s); HRMS (ESI) calcd for C<sub>26</sub>H<sub>32</sub>NO<sub>4</sub><sup>+</sup> [M+H]<sup>+</sup> 422.2326; found 422.2332.

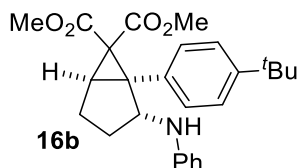

**16b**, minor diastereoisomer, pale yellow solid (55 mg, 0.13 mmol, 44 % yield). *R<sub>f</sub>* 0.32 (Pentane:Et<sub>2</sub>O 80:20); *m.p.* = 59–62 °C; <sup>1</sup>H NMR (400 MHz, Chloroform-*d*)<sup>23</sup> δ 7.34 – 7.26 (m, 2H, ArH), 7.24 – 7.19 (m, 2H, ArH), 7.10 – 7.03 (m, 2H, ArH), 6.65 (t, *J* = 7.3 Hz, 1H, ArH), 6.41 (d, *J* = 7.9 Hz, 2H, ArH), 4.33 (d, *J* = 5.8 Hz, 1H, CHNH), 3.87 (s, 3H, OCH<sub>3</sub>), 3.33 (s, 3H, OCH<sub>3</sub>), 2.91 (d, *J* = 4.4 Hz, 1H, CHCH<sub>2</sub>), 2.44 – 2.29 (m, 1H, NHCHCH<sub>2</sub>CH<sub>2</sub>), 2.12 (dd, *J* = 13.4, 8.3 Hz, 1H, NHCHCH<sub>2</sub>CH<sub>2</sub>), 1.94 (dd, *J* = 14.9, 9.4 Hz, 1H, NHCHCH<sub>2</sub>), 1.44 – 1.35 (m, 1H, NHCHCH<sub>2</sub>), 1.27 (s, 9H, <sup>t</sup>Bu); <sup>13</sup>C NMR (101 MHz, Chloroform-*d*) δ 168.1, 167.4, 150.8, 146.5, 131.3, 129.6, 129.3, 129.1, 126.0, 124.7, 118.0, 114.0, 59.2, 53.1, 52.6, 50.5, 42.6, 36.3, 34.7, 31.4, 29.9, 24.8; IR  $\tilde{\nu}_{\text{max}}$  3398 (w), 2964 (m), 2875 (w), 1732 (s), 1604 (m), 1502 (m), 1438 (m), 1259 (s), 1208 (m), 1125 (m), 914 (s), 735 (s), 697 (m); HRMS (ESI) calcd for C<sub>26</sub>H<sub>32</sub>NO<sub>4</sub><sup>+</sup> [M+H]<sup>+</sup> 422.2326; found 422.2321.

### Dimethyl 1-(3-fluorophenyl)-2-(phenylamino)bicyclo[3.1.0]hexane-6,6-dicarboxylate (**17**)

Following the general procedure D, starting from dimethyl 2-(3-fluorophenyl)cycloprop-2-ene-1,1-dicarboxylate (**72**) (75 mg, 0.30 mmol, 1.0 equiv.) and *N*-cyclopropylaniline (**9**) (72 mg, 0.54 mmol, 1.8 equiv.), the title compound **17** (56:44 *dr* in the crude <sup>1</sup>H NMR) was obtained as a separable mixture of two diastereoisomers after purification by column chromatography on Biotage (SNAP cartridge KP-SIL 25 g, Pentane:Et<sub>2</sub>O 95:5 to 85:15).

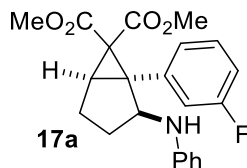

**17a**, major diastereoisomer, pale yellow oil (57 mg, 0.15 mmol, 50 % yield). *R<sub>f</sub>* 0.45 (Pentane:Et<sub>2</sub>O 70:30); <sup>1</sup>H NMR (400 MHz, Chloroform-*d*) δ 7.17 (td, *J* = 7.9, 5.9 Hz, 1H, ArH), 7.13 – 6.98 (m, 4H, ArH), 6.88 (tdd, *J* = 8.4, 2.7, 1.1 Hz, 1H, ArH), 6.60 (t, *J* = 7.3 Hz, 1H, ArH), 6.49 (d, *J* = 7.6 Hz, 2H, ArH), 5.35 (bs, 1H, NH), 4.44 (dd, *J* = 10.1, 7.6 Hz, 1H, CHNH), 3.88 (s, 3H, OCH<sub>3</sub>), 3.47 (s, 3H, OCH<sub>3</sub>), 2.65 (d, *J* = 4.1 Hz, 1H, CHCH<sub>2</sub>), 2.38 – 2.15 (m, 3H, NHCHCH<sub>2</sub> and NHCHCH<sub>2</sub>CH<sub>2</sub>), 0.96 – 0.86 (m, 1H, NHCHCH<sub>2</sub>); <sup>13</sup>C NMR (101 MHz, Chloroform-*d*) δ 169.9, 167.6, 162.6 (d, *J* = 246.0 Hz), 147.7, 140.3 (d, *J* = 7.7 Hz), 129.7 (d, *J*

= 8.4 Hz), 129.2, 124.8 (d,  $J = 2.9$  Hz), 117.4, 116.0 (d,  $J = 21.6$  Hz), 114.4 (d,  $J = 21.0$  Hz), 113.5, 63.5, 53.5, 52.9, 49.9, 42.1, 35.1, 28.0, 24.4;  **$^{19}\text{F}$  NMR (376 MHz, Chloroform- $d$ )**  $\delta$  -113.4 (td,  $J = 8.8, 6.0$  Hz); **IR**  $\tilde{\nu}_{\text{max}}$  3373 (m), 3028 (w), 2958 (m), 1725 (s), 1604 (s), 1508 (m), 1432 (s), 1309 (s), 1235 (s), 1190 (s), 1149 (s), 1075 (m), 992 (w), 912 (s), 867 (m), 789 (m), 733 (s), 692 (s), 651 (w); **HRMS (ESI)** calcd for  $\text{C}_{22}\text{H}_{23}\text{FNO}_4^+$   $[\text{M}+\text{H}]^+$  384.1606; found 384.1606.

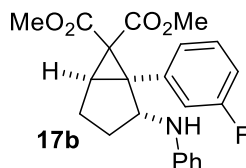

**17b**, minor diastereoisomer, pale yellow oil (47 mg, 0.12 mmol, 41 % yield). **R<sub>f</sub>** 0.40 (Pentane:Et<sub>2</sub>O 70:30);  **$^1\text{H}$  NMR (400 MHz, Chloroform- $d$ , 1:1 mixture of rotamers (A/B))**  $\delta$  7.25 – 7.19 (m, 0.5H, ArH (A)), 7.13 – 7.07 (m, 1H, ArH (A+B)), 7.04 – 6.96 (m, 3H, ArH (A+B)), 6.96 – 6.91 (m, 0.5H, ArH (B)), 6.88 – 6.78 (m, 1H, ArH (A+B)), 6.57 (t,  $J = 7.2$  Hz, 1H, ArH (A+B)), 6.32 (dd,  $J = 8.2, 3.4$  Hz, 2H, ArH (A+B)), 4.30 (dd,  $J = 12.8, 5.9$  Hz, 1H, CHNH (A+B)), 3.80 (s, 3H, OCH<sub>3</sub> (A+B)), 3.47 (s, 1H, NH (A+B)), 3.36 (s, 1.5H, OCH<sub>3</sub> (A)), 3.32 (s, 1.5H, OCH<sub>3</sub> (B)), 2.82 (dd,  $J = 7.8, 4.4$  Hz, 1H, CHCH<sub>2</sub> (A+B)), 2.26 (dddd,  $J = 14.0, 10.9, 9.4, 4.5$  Hz, 1H, NHCHCH<sub>2</sub>CH<sub>2</sub> (A+B)), 2.06 (dd,  $J = 13.6, 8.3$  Hz, 1H, NHCHCH<sub>2</sub>CH<sub>2</sub> (A+B)), 1.83 (dd,  $J = 15.0, 9.4$  Hz, 1H, NHCHCH<sub>2</sub> (A+B)), 1.34 (ddq,  $J = 14.6, 9.3, 5.4$  Hz, 1H, NHCHCH<sub>2</sub> (A+B));  **$^{13}\text{C}$  NMR (101 MHz, Chloroform- $d$ , 1:1 mixture of rotamers)**  $\delta$  167.2, 162.9 (d,  $J = 247.4$  Hz), 162.3 (d,  $J = 246.7$  Hz), 146.6, 146.5, 137.6 (t,  $J = 7.5$  Hz), 130.3 (d,  $J = 8.3$  Hz), 129.6 (d,  $J = 8.5$  Hz), 129.2, 125.6 (d,  $J = 3.1$  Hz), 117.8, 117.8, 117.1 (d,  $J = 21.5$  Hz), 116.6 (d,  $J = 21.2$  Hz), 115.2 (d,  $J = 21.2$  Hz), 114.8 (d,  $J = 20.8$  Hz), 113.5, 113.5, 59.0, 58.9, 53.2, 52.9, 52.8, 50.4, 50.4, 42.7, 42.5, 36.8, 36.6, 30.2, 30.0, 24.6; Not all carbon were resolved.  **$^{19}\text{F}$  NMR (376 MHz, Chloroform- $d$ , 1:1 mixture of rotamers (A/B))**  $\delta$  -112.7 (q,  $J = 8.4$  Hz (A)), -113.2 (q,  $J = 7.2$  Hz (B)); **IR**  $\tilde{\nu}_{\text{max}}$  3411 (m), 3060 (m), 2964 (m), 1735 (s), 1601 (m), 1498 (m), 1433 (m), 1243 (s), 1212 (s), 1180 (s), 1120 (m), 1073 (w), 1017 (w), 959 (m), 908 (s), 731 (s), 694 (s), 651 (m); **HRMS (ESI)** calcd for  $\text{C}_{22}\text{H}_{23}\text{FNO}_4^+$   $[\text{M}+\text{H}]^+$  384.1606; found 384.1603.

### 1-(4-Bromophenyl)-6,6-difluoro-*N*-phenylbicyclo[3.1.0]hexan-2-amine (18)

Following the general procedure D, starting from 1-bromo-4-(3,3-difluorocycloprop-1-en-1-yl)benzene (**73**) (69 mg, 0.30 mmol, 1.0 equiv.) and *N*-cyclopropylaniline (**9**) (72 mg, 0.54 mmol, 1.8 equiv.), the title compound **18** (67:33 *dr* in the crude  $^1\text{H}$  NMR) was obtained as a separable mixture of two diastereoisomers after purification by column chromatography on Biotage (SNAP cartridge KP-SIL 25 g, Pentane:Et<sub>2</sub>O 98:2 to 95:5).

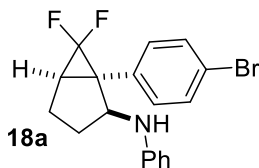

**18a**, major diastereoisomer, pale orange oil (65 mg, 0.18 mmol, 60 % yield). **R<sub>f</sub>** 0.40 (Pentane:Et<sub>2</sub>O 90:10);  **$^1\text{H}$  NMR (400 MHz, Chloroform- $d$ )**  $\delta$  7.41 (d,  $J = 8.4$  Hz, 2H, ArH),



7.23 (d,  $J = 8.4$  Hz, 2H, ArH), 7.13 – 7.05 (m, 2H, ArH), 6.68 (t,  $J = 7.4$  Hz, 1H, ArH), 6.49 (d,  $J = 7.2$  Hz, 2H, ArH), 4.53 (td,  $J = 8.8, 6.0$  Hz, 1H, CHNH), 4.04 (bs, 1H, NH), 2.52 – 2.40 (m, 1H, NHCHCH<sub>2</sub>), 2.38 – 2.22 (m, 2H, CF<sub>2</sub>CHCH<sub>2</sub>), 2.18 (dd,  $J = 14.3, 4.9$  Hz, 1H, CHCF<sub>2</sub>), 1.64 – 1.50 (m, 1H, NHCHCH<sub>2</sub>); <sup>13</sup>C NMR (101 MHz, Chloroform-*d*)  $\delta$  147.2, 134.3, 131.7, 130.6, 129.4, 121.7, 118.1, 116.4 (dd,  $J = 303.5, 281.3$  Hz), 113.7, 63.7, 44.3 (dd,  $J = 11.9, 8.2$  Hz), 33.7 (dd,  $J = 12.6, 9.1$  Hz), 31.3 (d,  $J = 7.4$  Hz), 24.4; <sup>19</sup>F NMR (376 MHz, Chloroform-*d*)  $\delta$  -124.7 (dd,  $J = 161.6, 13.8$  Hz), -138.6 (d,  $J = 161.5$  Hz); IR  $\tilde{\nu}_{\max}$  3405 (w), 3053 (w), 2951 (m), 2875 (w), 1603 (s), 1509 (s), 1496 (s), 1443 (m), 1396 (w), 1309 (m), 1284 (m), 1243 (m), 1206 (s), 1194 (s), 1151 (m), 1060 (m), 1013 (m), 986 (s), 910 (s), 820 (m), 729 (s), 692 (s), 653 (m); HRMS (ESI) calcd for C<sub>18</sub>H<sub>17</sub>BrF<sub>2</sub>N<sup>+</sup> [M+H]<sup>+</sup> 364.0507; found 364.0502.

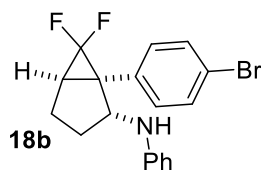

**18b**, minor diastereoisomer, pale orange oil (32 mg, 0.088 mmol, 29 % yield).  $R_f$  0.34 (Pentane:Et<sub>2</sub>O 90:10); <sup>1</sup>H NMR (400 MHz, Chloroform-*d*)  $\delta$  7.49 – 7.43 (m, 2H, ArH), 7.17 – 7.08 (m, 4H, ArH), 6.70 (t,  $J = 7.4$  Hz, 1H, ArH), 6.46 (d,  $J = 7.7$  Hz, 2H, ArH), 4.28 (d,  $J = 5.0$  Hz, 1H, CHNH), 3.53 (bs, 1H, NH), 2.44 (dd,  $J = 14.3, 5.3$  Hz, 1H, CHCF<sub>2</sub>), 2.38 – 2.25 (m, 1H, CF<sub>2</sub>CHCH<sub>2</sub>), 2.16 – 1.99 (m, 3H, CF<sub>2</sub>CHCH<sub>2</sub> and NHCHCH<sub>2</sub>); <sup>13</sup>C NMR (101 MHz, Chloroform-*d*)<sup>24</sup>  $\delta$  146.2, 131.8, 131.2, 129.2, 122.0, 118.1, 114.9 (dd,  $J = 305.0, 276.6$  Hz), 113.5, 57.3, 45.7 (dd,  $J = 12.4, 9.3$  Hz), 32.6 (dd,  $J = 11.7, 9.1$  Hz), 31.9 (d,  $J = 9.4$  Hz), 23.7; <sup>19</sup>F NMR (376 MHz, Chloroform-*d*)  $\delta$  -125.4 (ddd,  $J = 159.2, 14.3, 4.6$  Hz), -141.3 (d,  $J = 159.3$  Hz); IR  $\tilde{\nu}_{\max}$  3417 (w), 3053 (w), 2945 (m), 2862 (w), 1725 (w), 1604 (s), 1502 (s), 1425 (s), 1310 (m), 1247 (m), 1208 (m), 1075 (m), 994 (s), 906 (s), 822 (s), 727 (s), 694 (s), 649 (m); HRMS (ESI) calcd for C<sub>18</sub>H<sub>17</sub>BrF<sub>2</sub>N<sup>+</sup> [M+H]<sup>+</sup> 364.0507; found 364.0502.

#### 6,6-Difluoro-1-(4-methoxyphenyl)-*N*-phenylbicyclo[3.1.0]hexan-2-amine (**19**)

Following the general procedure D, starting from 1-(3,3-difluorocycloprop-1-en-1-yl)-4-methoxybenzene (**74**) (55 mg, 0.30 mmol, 1.0 equiv.) and *N*-cyclopropylaniline (**9**) (72 mg, 0.54 mmol, 1.8 equiv.), the title compound **19** (68:32 *dr* in the crude <sup>1</sup>H NMR) was obtained as a separable mixture of two diastereoisomers after purification by column chromatography on Biotage (SNAP cartridge KP-SIL 25 g, Pentane:Et<sub>2</sub>O 98:2 to 95:5).

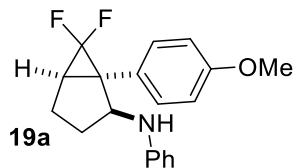

**19a**, major diastereoisomer, yellow oil (45 mg, 0.14 mmol, 48 % yield).  $R_f$  0.40 (Pentane:Et<sub>2</sub>O 90:10); <sup>1</sup>H NMR (400 MHz, Chloroform-*d*)  $\delta$  7.32 – 7.27 (m, 2H, ArH), 7.12 – 7.06 (m, 2H, ArH), 6.87 – 6.81 (m, 2H, ArH), 6.66 (t,  $J = 7.3$  Hz, 1H, ArH), 6.49 (d,  $J = 7.7$  Hz, 2H, ArH), 4.52 (td,  $J = 8.8, 6.1$  Hz, 1H, CHNH), 3.97 (bs, 1H, NH), 3.78 (s, 3H, CH<sub>3</sub>), 2.53 – 2.40 (m, 1H,

NHCHCH<sub>2</sub>), 2.39 – 2.23 (m, 2H, CF<sub>2</sub>CHCH<sub>2</sub>), 2.16 (dd, *J* = 14.3, 5.0 Hz, 1H, CHCF<sub>2</sub>), 1.64 – 1.50 (m, 1H, NHCHCH<sub>2</sub>); <sup>13</sup>C NMR (101 MHz, Chloroform-*d*) δ 159.1, 147.7, 129.9, 129.3, 127.2, 117.6, 116.9 (hidden dd, one peak was not found due to overlapping), 114.0, 113.5, 63.9, 55.4, 44.3 (dd, *J* = 11.7, 8.3 Hz), 33.6 (dd, *J* = 12.4, 9.0 Hz), 31.3 (d, *J* = 7.5 Hz), 24.4; <sup>19</sup>F NMR (376 MHz, Chloroform-*d*) δ -124.7 (dd, *J* = 160.2, 14.3 Hz), -138.7 (d, *J* = 159.6 Hz); IR  $\tilde{\nu}_{\text{max}}$  3405 (w), 3041 (w), 2945 (m), 2836 (w), 1604 (s), 1515 (s), 1444 (m), 1291 (m), 1246 (s), 1188 (m), 1180 (m), 1151 (m), 1066 (m), 1038 (m), 1021 (m), 984 (s), 943 (w), 912 (s), 828 (s), 807 (m), 752 (s), 731 (s), 694 (s); HRMS (ESI) calcd for C<sub>19</sub>H<sub>20</sub>F<sub>2</sub>NO<sup>+</sup> [M+H]<sup>+</sup> 316.1507; found 316.1511.

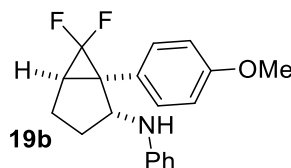

**19b**, minor diastereoisomer, yellow oil (19 mg, 0.060 mmol, 20 % yield). *R<sub>f</sub>* 0.34 (Pentane:Et<sub>2</sub>O 90:10); <sup>1</sup>H NMR (400 MHz, Chloroform-*d*) δ 7.23 – 7.17 (m, 2H, ArH), 7.16 – 7.08 (m, 2H, ArH), 6.91 – 6.85 (m, 2H, ArH), 6.69 (t, *J* = 7.3 Hz, 1H, ArH), 6.46 (d, *J* = 7.6 Hz, 2H, ArH), 4.20 (d, *J* = 4.6 Hz, 1H, CHNH), 3.80 (s, 3H, CH<sub>3</sub>), 3.62 (bs, 1H, NH), 2.39 (dd, *J* = 14.1, 5.3 Hz, 1H, CHCF<sub>2</sub>), 2.36 – 2.25 (m, 1H, CF<sub>2</sub>CHCH<sub>2</sub>), 2.17 – 1.98 (m, 3H, CF<sub>2</sub>CHCH<sub>2</sub> and NHCHCH<sub>2</sub>); <sup>13</sup>C NMR (101 MHz, Chloroform-*d*) δ 159.4, 146.7, 130.8, 129.3, 123.9, 117.8, 115.5 (dd, *J* = 304.6, 276.1 Hz), 114.3, 113.5, 57.4, 55.4, 45.7 (dd, *J* = 12.2, 9.5 Hz), 32.7 (dd, *J* = 11.8, 8.9 Hz), 32.0 (d, *J* = 9.5 Hz), 24.0; <sup>19</sup>F NMR (376 MHz, Chloroform-*d*) δ -125.6 (ddd, *J* = 158.1, 14.2, 4.9 Hz), -141.5 (d, *J* = 156.7 Hz); IR  $\tilde{\nu}_{\text{max}}$  3053 (w), 2951 (m), 3398 (w), 2849 (w), 1732 (w), 1601 (s), 1515 (s), 1505 (s), 1426 (s), 1299 (m), 1252 (s), 1206 (m), 1180 (s), 1108 (m), 1075 (m), 1036 (m), 992 (s), 922 (m), 908 (m), 832 (m), 746 (s), 692 (s); HRMS (ESI) calcd for C<sub>19</sub>H<sub>20</sub>F<sub>2</sub>NO<sup>+</sup> [M+H]<sup>+</sup> 316.1507; found 316.1514.

### 1-(3-Chlorophenyl)-6,6-difluoro-*N*-phenylbicyclo[3.1.0]hexan-2-amine (20)

Following the general procedure D, starting from 1-chloro-3-(3,3-difluorocycloprop-1-en-1-yl)benzene (**75**) (56 mg, 0.30 mmol, 1.0 equiv.) and *N*-cyclopropylaniline (**9**) (72 mg, 0.54 mmol, 1.8 equiv.), the title compound **20** (67:33 *dr* in the crude <sup>1</sup>H NMR) was obtained as a separable mixture of two diastereoisomers after purification by column chromatography on Biotage (SNAP cartridge KP-SIL 25 g, Pentane:Et<sub>2</sub>O 98:2 to 95:5).

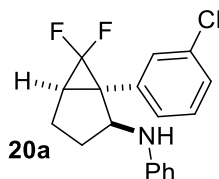

**20a**, major diastereoisomer, pale yellow oil (52 mg, 0.16 mmol, 54 % yield). *R<sub>f</sub>* 0.46 (Pentane:Et<sub>2</sub>O 90:10); <sup>1</sup>H NMR (400 MHz, Chloroform-*d*) δ 7.35 – 7.31 (m, 1H, ArH), 7.29 – 7.26 (m, 1H, ArH), 7.25 – 7.18 (m, 2H, ArH), 7.12 – 7.06 (m, 2H, ArH), 6.67 (t, *J* = 7.3 Hz, 1H, ArH), 6.49 (d, *J* = 7.4 Hz, 2H, ArH), 4.54 (td, *J* = 8.9, 6.1 Hz, 1H, CHNH), 3.92 (bs, 1H, NH),

2.46 (m, 1H, NHCHCH<sub>2</sub>), 2.39 – 2.26 (m, 2H, CF<sub>2</sub>CHCH<sub>2</sub>), 2.20 (dd, *J* = 14.4, 5.0 Hz, 1H, CHCF<sub>2</sub>), 1.63 – 1.49 (m, 1H, NHCHCH<sub>2</sub>); <sup>13</sup>C NMR (101 MHz, Chloroform-*d*) δ 147.4, 137.3, 134.3, 129.8, 129.3, 128.9 (d, *J* = 2.7 Hz), 127.9, 127.4, 118.0, 116.3 (dd, *J* = 303.4, 281.5 Hz), 113.7, 63.7, 44.5 (dd, *J* = 12.0, 8.3 Hz), 33.8 (dd, *J* = 12.5, 9.1 Hz), 31.3 (d, *J* = 7.4 Hz), 24.4; <sup>19</sup>F NMR (376 MHz, Chloroform-*d*) δ -124.4 (dd, *J* = 161.4, 14.1 Hz), -138.4 (d, *J* = 161.6 Hz); IR  $\tilde{\nu}_{\text{max}}$  3411 (m), 3060 (m), 2951 (m), 2875 (w), 1604 (s), 1502 (s), 1444 (m), 1311 (m), 1284 (m), 1243 (s), 1208 (s), 1198 (s), 1153 (s), 1064 (m), 988 (s), 949 (w), 912 (m), 879 (w), 785 (m), 750 (s), 694 (s); HRMS (ESI) calcd for C<sub>18</sub>H<sub>17</sub>ClF<sub>2</sub>N<sup>+</sup> [M+H]<sup>+</sup> 320.1012; found 320.0998.

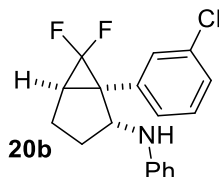

**20b**, minor diastereoisomer, pale yellow oil (29 mg, 0.091 mmol, 30 % yield). *R<sub>f</sub>* 0.40 (Pentane:Et<sub>2</sub>O 90:10); <sup>1</sup>H NMR (400 MHz, Chloroform-*d*) δ 7.27 – 7.24 (m, 3H, ArH), 7.19 – 7.15 (m, 1H, ArH), 7.14 – 7.08 (m, 2H, ArH), 6.69 (t, *J* = 7.4 Hz, 1H, ArH), 6.46 (d, *J* = 7.6 Hz, 2H, ArH), 4.30 (d, *J* = 4.6 Hz, 1H, CHNH), 3.54 (bs, 1H, NH), 2.45 (dd, *J* = 14.4, 5.3 Hz, 1H, CHCF<sub>2</sub>), 2.38 – 2.25 (m, 1H, CF<sub>2</sub>CHCH<sub>2</sub>), 2.16 – 1.98 (m, 3H, CF<sub>2</sub>CHCH<sub>2</sub> and NHCHCH<sub>2</sub>); <sup>13</sup>C NMR (101 MHz, Chloroform-*d*) δ 146.3, 134.6, 134.4 (d, *J* = 3.7 Hz), 130.0, 129.7 (d, *J* = 2.7 Hz), 129.3, 128.4, 128.0, 118.1, 115.0 (dd, *J* = 304.9, 276.8 Hz), 113.6, 57.4, 46.0 (dd, *J* = 12.5, 9.2 Hz), 32.7 (dd, *J* = 11.8, 9.0 Hz), 32.0 (d, *J* = 9.5 Hz), 23.8; <sup>19</sup>F NMR (376 MHz, Chloroform-*d*) δ -125.2 (ddd, *J* = 159.4, 14.5, 5.0 Hz), -141.2 (d, *J* = 158.3 Hz); IR  $\tilde{\nu}_{\text{max}}$  3405 (m), 3047 (m), 2958 (m), 2881 (m), 1601 (s), 1568 (m), 1505 (s), 1426 (s), 1315 (m), 1247 (s), 1208 (s), 1169 (m), 1089 (m), 1001 (s), 931 (s), 879 (m), 791 (s), 748 (s), 690 (s); HRMS (ESI) calcd for C<sub>18</sub>H<sub>17</sub>ClF<sub>2</sub>N<sup>+</sup> [M+H]<sup>+</sup> 320.1012; found 320.1007.

### Dimethyl 2-(phenylamino)-1-(trimethylsilyl)bicyclo[3.1.0]hexane-6,6-dicarboxylate (21)

Following the general procedure D, starting from dimethyl 2-(trimethylsilyl)cycloprop-2-ene-1,1-dicarboxylate (**77**) (69 mg, 0.30 mmol, 1.0 equiv.) and *N*-cyclopropylaniline (**9**) (72 mg, 0.54 mmol, 1.8 equiv.), the title compound **21** (59:41 *dr* in the crude <sup>1</sup>H NMR) was obtained as a separable mixture of two diastereoisomers after purification by column chromatography on Biotage (SNAP cartridge KP-SIL 25 g, Pentane:Et<sub>2</sub>O 95:5 to 90:10).

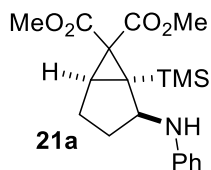

**21a**, major diastereoisomer, colorless oil (28 mg, 0.077 mmol, 26 % yield). *R<sub>f</sub>* 0.35 (Pentane:Et<sub>2</sub>O 90:10); <sup>1</sup>H NMR (400 MHz, Chloroform-*d*) δ 7.19 – 7.10 (m, 2H, ArH), 6.65 (t, *J* = 7.3 Hz, 1H, ArH), 6.58 (d, *J* = 7.9 Hz, 2H, ArH), 5.24 (bs, 1H, NH), 4.34 (t, *J* = 8.8 Hz, 1H, CHNH), 3.78 (s, 3H, OCH<sub>3</sub>), 3.73 (s, 3H, OCH<sub>3</sub>), 2.27 – 2.09 (m, 3H, CHCH<sub>2</sub>, NHCHCH<sub>2</sub> and NHCHCH<sub>2</sub>CH<sub>2</sub>), 2.08 – 1.96 (m, 1H, NHCHCH<sub>2</sub>CH<sub>2</sub>), 0.56 (dtd, *J* = 13.7, 10.2, 8.4 Hz, 1H,

NHCHCH<sub>2</sub>), 0.11 (s, 9H, TMS); <sup>13</sup>C NMR (101 MHz, Chloroform-*d*)<sup>24</sup> δ 171.0, 170.6, 147.8, 129.3, 117.0, 113.3, 60.4, 53.3, 53.0, 39.8, 36.8, 35.9, 26.1, -0.5; IR  $\tilde{\nu}_{\text{max}}$  3028 (w), 2958 (m), 2894 (w), 3373 (w), 1729 (s), 1603 (m), 1513 (m), 1435 (m), 1309 (m), 1182 (m), 1130 (m), 1075 (w), 978 (w), 908 (m), 844 (s), 754 (m), 692 (m); HRMS (ESI) calcd for C<sub>19</sub>H<sub>28</sub>NO<sub>4</sub>Si<sup>+</sup> [M+H]<sup>+</sup> 362.1782; found 362.1773.

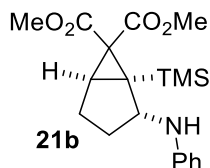

**21b**, minor diastereoisomer, colorless oil (25 mg, 0.069 mmol, 23 % yield). *R<sub>f</sub>* 0.25 (Pentane:Et<sub>2</sub>O 90:10); <sup>1</sup>H NMR (400 MHz, Chloroform-*d*)<sup>23</sup> δ 7.23 – 7.12 (m, 2H, ArH), 6.72 (t, *J* = 7.3 Hz, 1H, ArH), 6.58 (d, *J* = 7.6 Hz, 2H, ArH), 4.22 (d, *J* = 5.4 Hz, 1H, CHNH), 3.76 (s, 3H, OCH<sub>3</sub>), 3.70 (s, 3H, OCH<sub>3</sub>), 2.61 (d, *J* = 4.0 Hz, 1H, CHCH<sub>2</sub>), 2.20 – 1.96 (m, 2H, NHCHCH<sub>2</sub>CH<sub>2</sub>), 1.55 – 1.51 (m, 1H, NHCHCH<sub>2</sub>), 1.14 – 1.03 (m, 1H, NHCHCH<sub>2</sub>), 0.10 (s, 9H, TMS); <sup>13</sup>C NMR (101 MHz, Chloroform-*d*)<sup>24</sup> δ 169.4, 169.0, 146.1, 129.5, 118.1, 114.1, 60.1, 53.0, 53.0, 41.2, 36.7, 29.3, 24.7, 0.9; IR  $\tilde{\nu}_{\text{max}}$  3383 (w), 2924 (m), 2853 (s), 1734 (s), 1604 (m), 1551 (w), 1503 (m), 1441 (m), 1307 (m), 1247 (s), 1208 (m), 1169 (m), 1123 (m), 1072 (w), 1010 (w), 915 (m), 849 (m), 745 (m), 696 (s); HRMS (ESI) calcd for C<sub>19</sub>H<sub>28</sub>NO<sub>4</sub>Si<sup>+</sup> [M+H]<sup>+</sup> 362.1782; found 362.1777.

### Dimethyl 2-(phenylamino)bicyclo[3.1.0]hexane-6,6-dicarboxylate (**22**)

Following the general procedure D, starting from dimethyl cycloprop-2-ene-1,1-dicarboxylate (**78**) (47 mg, 0.30 mmol, 1.0 equiv.) and *N*-cyclopropylaniline (**9**) (72 mg, 0.54 mmol, 1.8 equiv.), the title compound **22** (69:31 *dr* in the crude <sup>1</sup>H NMR) was obtained as a separable mixture of two diastereoisomers after purification by column chromatography on Biotage (SNAP cartridge KP-SIL 25 g, Pentane:Et<sub>2</sub>O 90:10 to 80:20).

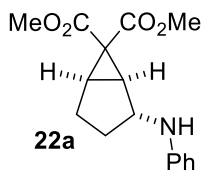

**22a**, major diastereoisomer,<sup>25</sup> colorless oil (22 mg, 0.076 mmol, 25 % yield). *R<sub>f</sub>* 0.42 (Pentane:Et<sub>2</sub>O 70:30); <sup>1</sup>H NMR (400 MHz, Chloroform-*d*)<sup>23</sup> δ 7.24 – 7.16 (m, 2H, ArH), 6.76 (t, *J* = 7.4 Hz, 1H, ArH), 6.69 (d, *J* = 7.9 Hz, 2H, ArH), 4.12 (d, *J* = 6.6 Hz, 1H, CHNH), 3.80 (s, 3H, OCH<sub>3</sub>), 3.71 (s, 3H, OCH<sub>3</sub>), 2.31 – 2.24 (m, 2H, NHCHCH & C<sub>quat</sub>CH), 2.22 – 2.11 (m, 1H, NHCHCH<sub>2</sub>CH<sub>2</sub>), 2.07 (dd, *J* = 13.8, 8.7 Hz, 1H, NHCHCH<sub>2</sub>CH<sub>2</sub>), 1.74 (dd, *J* = 15.3, 9.3 Hz, 1H, NHCHCH<sub>2</sub>), 1.34 – 1.26 (m, 1H, NHCHCH<sub>2</sub>); <sup>13</sup>C NMR (101 MHz, Chloroform-*d*) δ 170.2, 167.8, 146.1, 129.5, 118.5, 114.1, 55.0, 53.1, 53.0, 38.2, 36.3, 34.1, 29.7, 24.6; IR  $\tilde{\nu}_{\text{max}}$  3398 (w), 2951 (m), 1725 (s), 1605 (s), 1507 (m), 1435 (s), 1326 (s), 1252 (s), 1196 (m), 1161 (s), 1114

<sup>25</sup> Relative stereochemistry attributed by analogy with compounds **16b**, based on <sup>1</sup>H NMR chemical shifts and couplings.

(m), 1064 (w), 994 (w), 908 (m), 731 (s), 694 (m); **HRMS (ESI)** calcd for  $C_{16}H_{19}NNaO_4^+$   $[M+Na]^+$  312.1206; found 312.1212.

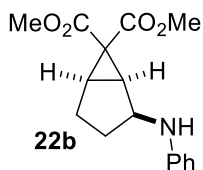

**22b**, minor diastereoisomer,<sup>26</sup> pale yellow oil (8 mg, 0.03 mmol, 9 % yield).  $R_f$  0.30 (Pentane:Et<sub>2</sub>O 70:30); **<sup>1</sup>H NMR (400 MHz, Chloroform-*d*)**  $\delta$  7.20 – 7.15 (m, 2H, ArH), 6.72 – 6.65 (m, 3H, ArH), 4.70 (bs, 1H, NH), 4.47 (ddd,  $J$  = 10.3, 8.3, 4.4 Hz, 1H, CHNH), 3.84 (s, 3H, OCH<sub>3</sub>), 3.70 (s, 3H, OCH<sub>3</sub>), 2.43 (dd,  $J$  = 6.7, 4.3 Hz, 1H, NHCHCH), 2.21 – 2.01 (m, 4H, C<sub>quat</sub>CH, NHCHCH<sub>2</sub>CH<sub>2</sub> and NHCHCH<sub>2</sub>), 0.78 – 0.63 (m, 1H, NHCHCH<sub>2</sub>); **<sup>13</sup>C NMR (101 MHz, Chloroform-*d*)**  $\delta$  170.3, 169.7, 147.9, 129.5, 117.7, 113.8, 55.9, 53.2, 53.1, 37.1, 36.1, 32.1, 27.4, 25.0; **IR**  $\tilde{\nu}_{max}$  3379 (w), 3034 (w), 2951 (m), 2856 (w), 1732 (s), 1603 (s), 1515 (s), 1435 (m), 1313 (s), 1247 (s), 1202 (m), 1163 (m), 1114 (w), 916 (w), 752 (s), 696 (m); **HRMS (ESI)** calcd for  $C_{16}H_{20}NO_4^+$   $[M+H]^+$  290.1387; found 290.1388.

#### Dimethyl 2-((4-chlorophenyl)amino)-1-phenylbicyclo[3.1.0]hexane-6,6-dicarboxylate (**26**)

Following the general procedure D, starting from dimethyl dimethyl 2-phenylcycloprop-2-ene-1,1-dicarboxylate (**7**) (70 mg, 0.30 mmol, 1.0 equiv.) and 4-chloro-*N*-cyclopropylaniline (**92**) (91 mg, 0.54 mmol, 1.8 equiv.), the title compound **26** (56:44 *dr* in the crude <sup>1</sup>H NMR) was obtained as a separable mixture of two diastereoisomers after purification by column chromatography on Biotage (SNAP cartridge KP-SIL 25 g, Pentane:Et<sub>2</sub>O 95:5 to 90:10).

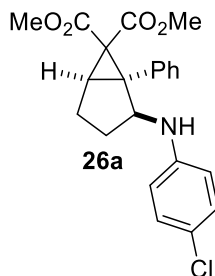

**26a**, major diastereoisomer, pale yellow oil (48 mg, 0.12 mmol, 40 % yield).  $R_f$  0.38 (Pentane:Et<sub>2</sub>O 80:20); **<sup>1</sup>H NMR (400 MHz, Chloroform-*d*)**  $\delta$  7.32 – 7.28 (m, 2H, ArH), 7.26 – 7.20 (m, 3H, ArH), 6.97 (d,  $J$  = 8.8, 2H, ArH), 6.38 (d,  $J$  = 8.9, 2H, ArH), 5.38 (s, 1H, NH), 4.40 (dd,  $J$  = 10.3, 7.6, 1H, CHNH), 3.90 (s, 3H, OCH<sub>3</sub>), 3.44 (s, 3H, OCH<sub>3</sub>), 2.68 (d,  $J$  = 4.3, 1H, CHCH<sub>2</sub>), 2.34 – 2.18 (m, 3H, NHCHCH<sub>2</sub> and NHCHCH<sub>2</sub>CH<sub>2</sub>), 0.93 (dtd,  $J$  = 16.9, 8.3, 7.9, 3.4, 1H, NHCHCH<sub>2</sub>); **<sup>13</sup>C NMR (101 MHz, Chloroform-*d*)**  $\delta$  170.3, 167.7, 146.6, 137.6, 128.9, 128.9, 128.3, 127.5, 121.4, 114.4, 63.8, 53.5, 52.8, 50.3, 42.1, 34.9, 28.1, 24.5; **IR**  $\tilde{\nu}_{max}$  3384 (w), 3030 (w), 2953 (m), 1727 (s), 1600 (m), 1504 (s), 1434 (m), 1402 (w), 1296 (s), 1236 (s), 1196 (m), 1176 (m), 1121 (m), 1090 (m), 1007 (w), 911 (s), 817 (m); **HRMS (ESI)** calcd for  $C_{22}H_{23}ClNO_4^+$   $[M+H]^+$  400.1310; found 400.1308.

<sup>26</sup> Relative stereochemistry attributed by analogy with compounds **9a**, based on <sup>1</sup>H NMR chemical shifts and couplings.

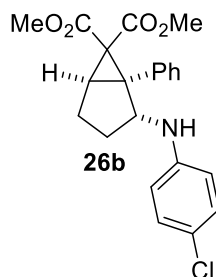

**26b**, minor diastereoisomer, pale yellow oil (41 mg, 0.10 mmol, 34 % yield).  $R_f$  0.30 (Pentane:Et<sub>2</sub>O 80:20);  $^1\text{H NMR}$  (400 MHz, Chloroform-*d*)<sup>23</sup>  $\delta$  7.40 – 7.26 (m, 3H, ArH), 7.23 (m, 2H, ArH), 6.99 (d,  $J$  = 8.9, 2H, ArH), 6.30 (d,  $J$  = 8.7, 2H, ArH), 4.31 (d,  $J$  = 5.9, 1H, CHNH), 3.87 (s, 3H, OCH<sub>3</sub>), 3.36 (s, 3H, OCH<sub>3</sub>), 2.92 (d,  $J$  = 4.4, 1H, CHCH<sub>2</sub>), 2.35 (dddd,  $J$  = 13.9, 10.8, 9.5, 4.5, 1H, NHCHCH<sub>2</sub>CH<sub>2</sub>), 2.13 (dd,  $J$  = 13.6, 8.2, 1H, NHCHCH<sub>2</sub>CH<sub>2</sub>), 1.88 (dd,  $J$  = 14.9, 9.5, 1H, NHCHCH<sub>2</sub>), 1.44 – 1.36 (m, 1H, NHCHCH<sub>2</sub>);  $^{13}\text{C NMR}$  (101 MHz, Chloroform-*d*)  $\delta$  168.0, 167.3, 145.1, 134.5, 129.8, 129.7, 128.9, 128.1, 128.1, 114.8, 59.3, 53.2, 52.8, 50.8, 42.6, 36.4, 30.0, 24.7; **IR**  $\tilde{\nu}_{\text{max}}$  3409 (w), 2956 (m), 2905 (m), 1735 (s), 1602 (m), 1500 (s), 1436 (m), 1398 (w), 1317 (m), 1259 (s), 1209 (m), 1178 (m), 1124 (m), 1071 (m), 913 (m), 818 (m); **HRMS (ESI)** calcd for C<sub>22</sub>H<sub>22</sub>ClNNaO<sub>4</sub><sup>+</sup> [M+Na]<sup>+</sup> 422.1130; found 422.1141.

#### Dimethyl 1-phenyl-2-(*p*-tolylamino)bicyclo[3.1.0]hexane-6,6-dicarboxylate (**27**)

Following the general procedure D, starting from dimethyl dimethyl 2-phenylcycloprop-2-ene-1,1-dicarboxylate (**7**) (70 mg, 0.30 mmol, 1.0 equiv.) and *N*-cyclopropyl-4-methylaniline (**93**) (79 mg, 0.54 mmol, 1.8 equiv.), the title compound **27** (55:45 *dr* in the crude  $^1\text{H NMR}$ ) was obtained as a separable mixture of two diastereoisomers after purification by column chromatography on Biotage (SNAP cartridge KP-SIL 25 g, Pentane:Et<sub>2</sub>O 95:5 to 90:10).

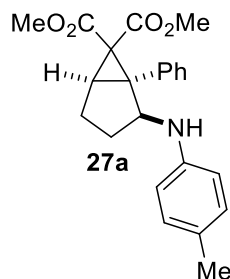

**27a**, major diastereoisomer, pale yellow oil (55 mg, 0.15 mmol, 48 % yield).  $R_f$  0.40 (Pentane:Et<sub>2</sub>O 80:20);  $^1\text{H NMR}$  (400 MHz, Chloroform-*d*)  $\delta$  7.34 – 7.28 (m, 2H, ArH), 7.25 – 7.14 (m, 3H, ArH), 6.85 (d,  $J$  = 7.9, 2H, ArH), 6.40 (d,  $J$  = 8.3, 2H, ArH), 5.15 (bs, 1H, NH), 4.40 (dd,  $J$  = 10.1, 7.4, 1H, CHNH), 3.87 (s, 3H, OCH<sub>3</sub>), 3.42 (s, 3H, OCH<sub>3</sub>), 2.65 (d,  $J$  = 4.1, 1H, CHCH<sub>2</sub>), 2.35 – 2.18 (m, 3H, NHCHCH<sub>2</sub> and NHCHCH<sub>2</sub>CH<sub>2</sub>), 2.17 (s, 3H, CH<sub>3</sub>), 0.88 (ddt,  $J$  = 13.7, 8.2, 4.0, 1H, NHCHCH<sub>2</sub>);  $^{13}\text{C NMR}$  (101 MHz, Chloroform-*d*)  $\delta$  170.1, 167.8, 145.7, 137.8, 129.6, 129.0, 128.2, 127.3, 126.2, 113.5, 64.0, 53.4, 52.8, 50.5, 42.0, 34.8, 28.0, 24.5, 20.4; **IR**  $\tilde{\nu}_{\text{max}}$  3375 (w), 3027 (w), 2956 (w), 1730 (m), 1619 (m), 1518 (m), 1434 (m), 1305 (m), 1238 (m), 1189 (m), 1126 (m), 1078 (w), 920 (w), 806 (m), 735 (m), 701 (m); **HRMS (ESI)** calcd for C<sub>23</sub>H<sub>26</sub>NO<sub>4</sub><sup>+</sup> [M+H]<sup>+</sup> 380.1856; found 380.1868.

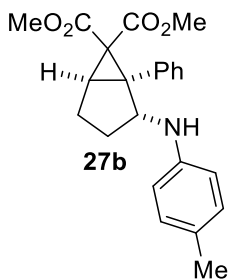

**27b**, minor diastereoisomer, pale yellow oil (45 mg, 0.12 mmol, 40 % yield).  $R_f$  0.34 (Pentane:Et<sub>2</sub>O 80:20);  $^1\text{H NMR}$  (400 MHz, Chloroform-*d*)<sup>23</sup>  $\delta$  7.42 – 7.29 (m, 3H, ArH), 7.25 – 7.17 (m, 2H, ArH), 6.89 (d,  $J$  = 8.0, 2H, ArH), 6.34 (d,  $J$  = 8.5, 2H, ArH), 4.32 (d,  $J$  = 5.8, 1H, CHNH), 3.87 (s, 3H, OCH<sub>3</sub>), 3.36 (s, 3H, OCH<sub>3</sub>), 2.92 (d,  $J$  = 4.4, 1H, CHCH<sub>2</sub>), 2.44 – 2.30 (m, 1H, NHCHCH<sub>2</sub>CH<sub>2</sub>), 2.18 (s, 3H, CH<sub>3</sub>), 2.13 (dd,  $J$  = 13.6, 8.4, 1H, NHCHCH<sub>2</sub>CH<sub>2</sub>), 1.94 (dd,  $J$  = 14.8, 9.3, 1H, NHCHCH<sub>2</sub>), 1.43 – 1.32 (m, 1H, NHCHCH<sub>2</sub>);  $^{13}\text{C NMR}$  (101 MHz, Chloroform-*d*)  $\delta$  168.1, 167.4, 144.2, 134.6, 129.8, 129.7, 128.9, 128.0, 128.0, 114.1, 59.6, 53.1, 52.7, 50.9, 42.5, 36.5, 29.8, 24.8, 20.5;  $\text{IR } \tilde{\nu}_{\text{max}}$  3401 (w), 3025 (w), 2949 (m), 2872 (w), 1737 (s), 1731 (s), 1620 (m), 1518 (s), 1436 (m), 1254 (s), 1212 (s), 1126 (s), 1072 (w), 1013 (w), 913 (m), 808 (m), 737 (m), 703 (s);  $\text{HRMS (ESI)}$  calcd for C<sub>23</sub>H<sub>26</sub>NO<sub>4</sub><sup>+</sup> [M+H]<sup>+</sup> 380.1856; found 380.1849.

#### Dimethyl 2-((4-methoxyphenyl)amino)-1-phenylbicyclo[3.1.0]hexane-6,6-dicarboxylate (**28**)

Following the general procedure D, starting from dimethyl dimethyl 2-phenylcycloprop-2-ene-1,1-dicarboxylate (**7**) (70 mg, 0.30 mmol, 1.0 equiv.) and *N*-cyclopropyl-4-methoxyaniline (**94**) (88 mg, 0.54 mmol, 1.8 equiv.), the title compound **28** (52:48 *dr* in the crude  $^1\text{H NMR}$ ) was obtained as a separable mixture of two diastereoisomers after purification by column chromatography on Biotage (SNAP cartridge KP-SIL 25 g, Pentane:Et<sub>2</sub>O 90:10 to 80:20).

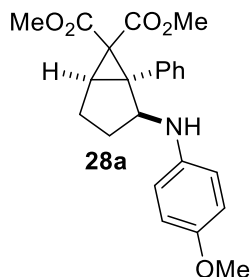

**28a**, major diastereoisomer, yellow oil (53 mg, 0.13 mmol, 45 % yield).  $R_f$  0.35 (Pentane:Et<sub>2</sub>O 75:25);  $^1\text{H NMR}$  (400 MHz, Chloroform-*d*)  $\delta$  7.32 – 7.26 (m, 2H, ArH), 7.24 – 7.13 (m, 3H, ArH), 6.63 (d,  $J$  = 8.9 Hz, 2H, ArH), 6.43 (d,  $J$  = 8.8 Hz, 2H, ArH), 5.01 (bs, 1H, NH), 4.41 – 4.30 (m, 1H, CHNH), 3.87 (s, 3H, COOCH<sub>3</sub>), 3.68 (s, 3H, OCH<sub>3</sub>), 3.42 (s, 3H, COOCH<sub>3</sub>), 2.64 (d,  $J$  = 4.8 Hz, 1H, CHCH<sub>2</sub>), 2.34 – 2.13 (m, 3H, NHCHCH<sub>2</sub> and NHCHCH<sub>2</sub>CH<sub>2</sub>), 0.96 – 0.83 (m, 1H, NHCHCH<sub>2</sub>);  $^{13}\text{C NMR}$  (101 MHz, Chloroform-*d*)<sup>24</sup>  $\delta$  170.2, 167.8, 151.9, 142.2, 137.9, 129.0, 128.2, 127.3, 114.9, 64.8, 56.0, 53.4, 52.8, 50.5, 42.1, 34.9, 28.1, 24.5;  $\text{IR } \tilde{\nu}_{\text{max}}$  3366 (w), 3028 (w), 2958 (m), 1732 (s), 1515 (s), 1444 (m), 1310 (m), 1234 (s), 1182 (m), 1131 (m), 1074

(w), 1036 (m), 908 (m), 822 (m), 733 (s), 702 (m); **HRMS (ESI)** calcd for  $C_{23}H_{26}NO_5^+$   $[M+H]^+$  396.1805; found 396.1802.

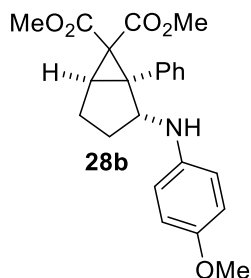

**28b**, minor diastereoisomer, pale yellow oil (47 mg, 0.12 mmol, 40 % yield).  $R_f$  0.30 (Pentane:Et<sub>2</sub>O 75:25); **<sup>1</sup>H NMR (400 MHz, Chloroform-*d*)**<sup>23</sup>  $\delta$  7.41 – 7.28 (m, 3H, ArH), 7.25 – 7.19 (m, 2H, ArH), 6.67 (d,  $J$  = 8.5 Hz, 2H, ArH), 6.36 (d,  $J$  = 8.4 Hz, 2H, ArH), 4.27 (d,  $J$  = 5.7 Hz, 1H, CHNH), 3.87 (s, 3H, COOCH<sub>3</sub>), 3.69 (s, 3H, OCH<sub>3</sub>), 3.36 (s, 3H, COOCH<sub>3</sub>), 2.91 (d,  $J$  = 4.3 Hz, 1H, CHCH<sub>2</sub>), 2.43 – 2.30 (m, 1H, NHCHCH<sub>2</sub>CH<sub>2</sub>), 2.13 (dd,  $J$  = 13.5, 8.3 Hz, 1H, NHCHCH<sub>2</sub>CH<sub>2</sub>), 1.90 (dd,  $J$  = 14.9, 9.4 Hz, 1H, NHCHCH<sub>2</sub>), 1.42 – 1.33 (m, 1H, NHCHCH<sub>2</sub>); **<sup>13</sup>C NMR (101 MHz, Chloroform-*d*)**  $\delta$  168.1, 167.4, 152.5, 141.1, 134.8, 129.8 (d,  $J$  = 3.5 Hz), 128.9, 128.0 (d,  $J$  = 9.7 Hz), 115.1, 114.8, 59.9, 55.9, 53.1, 52.7, 51.1, 42.5, 36.4, 30.0, 24.8; **IR**  $\tilde{\nu}_{max}$  3398 (w), 3028 (w), 2951 (m), 2843 (w), 1732 (s), 1511 (s), 1435 (m), 1243 (s), 1186 (m), 1124 (m), 1071 (w), 1036 (m), 912 (s), 826 (m), 731 (s), 700 (m); **HRMS (ESI)** calcd for  $C_{23}H_{26}NO_5^+$   $[M+H]^+$  396.1805; found 396.1807.

#### Dimethyl 2-((3-methoxyphenyl)amino)-1-phenylbicyclo[3.1.0]hexane-6,6-dicarboxylate (**29**)

Following the general procedure D, starting from dimethyl 2-phenylcycloprop-2-ene-1,1-dicarboxylate (**7**) (70 mg, 0.30 mmol, 1.0 equiv.) and *N*-cyclopropyl-3-methoxyaniline (**95**) (88 mg, 0.54 mmol, 1.8 equiv.), the title compound **29** (56:44 *dr* in the crude <sup>1</sup>H NMR) was obtained as a separable mixture of two diastereoisomers after purification by column chromatography on Biotage (SNAP cartridge KP-SIL 25 g, Pentane:Et<sub>2</sub>O 90:10 to 80:20).

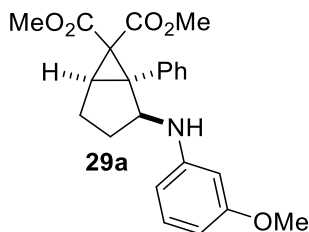

**29a**, major diastereoisomer, pale yellow oil (57 mg, 0.14 mmol, 48 % yield).  $R_f$  0.35 (Pentane:Et<sub>2</sub>O 75:25); **<sup>1</sup>H NMR (400 MHz, Chloroform-*d*)**  $\delta$  7.32 – 7.28 (m, 2H, ArH), 7.23 – 7.17 (m, 3H, ArH), 6.94 (t,  $J$  = 8.1 Hz, 1H, ArH), 6.14 (dd,  $J$  = 8.1, 1.9 Hz, 1H, ArH), 6.10 (dd,  $J$  = 8.0, 1.7 Hz, 1H, ArH), 5.99 (t,  $J$  = 2.3 Hz, 1H, ArH), 5.36 (bs, 1H, NH), 4.41 (dd,  $J$  = 10.1, 7.6 Hz, 1H, CHNH), 3.87 (s, 3H, COOCH<sub>3</sub>), 3.67 (s, 3H, OCH<sub>3</sub>), 3.42 (s, 3H, COOCH<sub>3</sub>), 2.65 (d,  $J$  = 4.1 Hz, 1H, CHCH<sub>2</sub>), 2.34 – 2.18 (m, 3H, NHCHCH<sub>2</sub> and NHCHCH<sub>2</sub>CH<sub>2</sub>), 0.95 – 0.86 (m, 1H, NHCHCH<sub>2</sub>); **<sup>13</sup>C NMR (101 MHz, Chloroform-*d*)**  $\delta$  170.2, 167.7, 160.8, 149.3, 137.7, 129.9,



129.0, 128.3, 127.4, 106.5, 102.5, 99.1, 63.6, 55.1, 53.4, 52.8, 50.4, 42.1, 34.9, 28.1, 24.5; **IR**  $\tilde{\nu}_{\text{max}}$  3366 (w), 3015 (w), 2951 (m), 1725 (s), 1604 (s), 1508 (m), 1432 (m), 1297 (s), 1227 (s), 1163 (s), 1119 (m), 1074 (w), 1042 (w), 908 (m), 838 (w), 731 (s), 702 (m); **HRMS (ESI)** calcd for  $\text{C}_{23}\text{H}_{26}\text{NO}_5^+$   $[\text{M}+\text{H}]^+$  396.1805; found 396.1806.

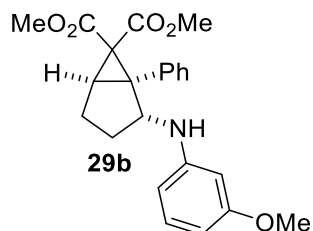

**29b**, minor diastereoisomer, colorless oil (48 mg, 0.12 mmol, 41 % yield). **R<sub>f</sub>** 0.30 (Pentane:Et<sub>2</sub>O 75:25); **<sup>1</sup>H NMR (400 MHz, Chloroform-*d*)**  $\delta$  7.33 – 7.23 (m, 3H, ArH), 7.18 – 7.13 (m, 2H, ArH), 6.90 (t,  $J$  = 8.1 Hz, 1H, ArH), 6.15 (dd,  $J$  = 8.0, 2.0 Hz, 1H, ArH), 5.94 (dd,  $J$  = 8.2, 1.8 Hz, 1H, ArH), 5.89 (t,  $J$  = 2.1 Hz, 1H, ArH), 4.26 (d,  $J$  = 5.8 Hz, 1H, CHNH), 3.80 (s, 3H, COOCH<sub>3</sub>), 3.64 (s, 3H, OCH<sub>3</sub>), 3.29 (s, 3H, COOCH<sub>3</sub>), 2.85 (d,  $J$  = 4.4 Hz, 1H, CHCH<sub>2</sub>), 2.36 – 2.20 (m, 1H, NHCHCH<sub>2</sub>CH<sub>2</sub>), 2.06 (dd,  $J$  = 13.7, 8.1 Hz, 1H, NHCHCH<sub>2</sub>CH<sub>2</sub>), 1.87 (dd,  $J$  = 15.0, 9.4 Hz, 1H, NHCHCH<sub>2</sub>), 1.33 – 1.27 (m, 1H, NHCHCH<sub>2</sub>); **<sup>13</sup>C NMR (101 MHz, Chloroform-*d*)**  $\delta$  168.0, 167.3, 160.7, 147.7, 134.6, 129.9, 129.0, 128.1, 128.0, 107.1, 103.0, 100.1, 59.3, 55.3, 53.2, 52.7, 50.8, 42.6, 36.4, 30.0, 24.8; **IR**  $\tilde{\nu}_{\text{max}}$  3405 (w), 2955 (m), 2850 (w), 1737 (s), 1607 (s), 1500 (m), 1443 (m), 1258 (s), 1212 (s), 1169 (m), 1118 (m), 1050 (w), 912 (m), 834 (w), 729 (s), 696 (m); **HRMS (ESI)** calcd for  $\text{C}_{23}\text{H}_{25}\text{NNaO}_5^+$   $[\text{M}+\text{Na}]^+$  418.1625; found 418.1632.

### Dimethyl 2-((3-bromophenyl)amino)-1-phenylbicyclo[3.1.0]hexane-6,6-dicarboxylate (**30**)

Following the general procedure D, starting from dimethyl dimethyl 2-phenylcycloprop-2-ene-1,1-dicarboxylate (**7**) (70 mg, 0.30 mmol, 1.0 equiv.) and 3-bromo-*N*-cyclopropylaniline (**9b**) (115 mg, 0.54 mmol, 1.8 equiv.), the title compound **30** (56:44 *dr* in the crude <sup>1</sup>H NMR) was obtained as a separable mixture of two diastereoisomers after purification by column chromatography on Biotage (SNAP cartridge KP-SIL 25 g, Pentane:Et<sub>2</sub>O 90:10 to 85:15).

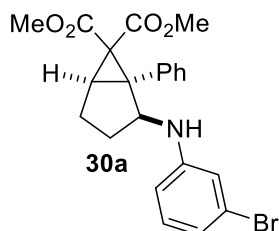

**30a**, major diastereoisomer, yellow oil (62 mg, 0.14 mmol, 47 % yield). **R<sub>f</sub>** 0.40 (Pentane:Et<sub>2</sub>O 70:30); **<sup>1</sup>H NMR (400 MHz, Chloroform-*d*)**  $\delta$  7.30 – 7.26 (m, 2H, ArH), 7.25 – 7.16 (m, 3H, ArH), 6.85 (t,  $J$  = 8.0 Hz, 1H, ArH), 6.66 (ddd,  $J$  = 7.8, 1.8, 0.9 Hz, 1H, ArH), 6.55 (t,  $J$  = 2.1 Hz, 1H, ArH), 6.36 (ddd,  $J$  = 8.2, 2.3, 0.9 Hz, 1H, ArH), 5.37 (bs, 1H, NH), 4.38 (dd,  $J$  = 10.1, 7.4 Hz, 1H, CHNH), 3.87 (s, 3H, COOCH<sub>3</sub>), 3.42 (s, 3H, COOCH<sub>3</sub>), 2.70 – 2.64 (d,  $J$  = 5.1 Hz, 1H, CHCH<sub>2</sub>), 2.36 – 2.14 (m, 3H, NHCHCH<sub>2</sub> and NHCHCH<sub>2</sub>CH<sub>2</sub>), 0.99 – 0.83 (m, 1H, NHCHCH<sub>2</sub>);

**<sup>13</sup>C NMR (101 MHz, Chloroform-*d*)**  $\delta$  170.2, 167.6, 149.4, 137.5, 130.3, 128.9, 128.4, 127.5, 123.2, 119.6, 115.7, 112.0, 63.4, 53.5, 52.8, 50.3, 42.1, 34.9, 28.0, 24.5; **IR**  $\tilde{\nu}_{\text{max}}$  3668 (w), 3379 (m), 2959 (m), 2898 (m), 1723 (s), 1595 (s), 1510 (s), 1480 (m), 1434 (m), 1288 (s), 1231 (s), 1197 (m), 1120 (m), 1079 (s), 985 (m), 908 (s), 760 (s), 731 (s), 700 (s), 681 (m); **HRMS (ESI)** calcd for C<sub>22</sub>H<sub>23</sub><sup>79</sup>BrNO<sub>4</sub><sup>+</sup> [M + H]<sup>+</sup> 444.0805; found 444.0812.

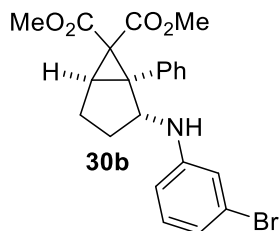

**30b**, minor diastereoisomer, yellow oil (39 mg, 0.088 mmol, 29 % yield). **R<sub>f</sub>** 0.35 (Pentane:Et<sub>2</sub>O 70:30); **<sup>1</sup>H NMR (400 MHz, Chloroform-*d*)**  $\delta$  7.41 – 7.29 (m, 2H, ArH), 7.27 – 7.22 (m, 3H, ArH), 6.89 (t, *J* = 8.0 Hz, 1H, ArH), 6.73 (ddd, *J* = 7.9, 1.8, 0.9 Hz, 1H, ArH), 6.50 (t, *J* = 2.1 Hz, 1H, ArH), 6.27 (ddd, *J* = 8.3, 2.3, 1.0 Hz, 1H, ArH), 4.33 (d, *J* = 5.8 Hz, 1H, CHNH), 3.89 (s, 3H, COOCH<sub>3</sub>), 3.62 (bs, 1H, NH), 3.37 (s, 3H, COOCH<sub>3</sub>), 2.92 (d, *J* = 4.4 Hz, 1H, CHCH<sub>2</sub>), 2.40 – 2.26 (m, 1H, NHCHCH<sub>2</sub>CH<sub>2</sub>), 2.15 (dd, *J* = 13.5, 8.3 Hz, 1H, NHCHCH<sub>2</sub>CH<sub>2</sub>), 1.88 (dd, *J* = 14.9, 9.4 Hz, 1H, NHCHCH<sub>2</sub>), 1.46 – 1.37 (m, 1H, NHCHCH<sub>2</sub>); **<sup>13</sup>C NMR (101 MHz, Chloroform-*d*)**  $\delta$  168.0, 167.3, 148.0, 134.5, 130.4, 129.8, 129.6, 129.0, 128.1, 128.1, 123.1, 120.3, 115.9, 112.1, 58.7, 53.2, 52.8, 50.7, 42.6, 36.3, 30.0, 24.7; **IR**  $\tilde{\nu}_{\text{max}}$  3405 (w), 3031 (w), 2952 (m), 2858 (w), 1733 (s), 1595 (s), 1489 (m), 1434 (m), 1317 (m), 1255 (s), 1211 (s), 1122 (m), 1074 (w), 987 (m), 914 (m), 839 (w), 732 (s), 702 (s); **HRMS (ESI)** calcd for C<sub>22</sub>H<sub>22</sub>BrNNaO<sub>4</sub><sup>+</sup> [M + Na]<sup>+</sup> 466.0624; found 466.0624.

### Dimethyl 1-phenyl-2-(pyridin-3-ylamino)bicyclo[3.1.0]hexane-6,6-dicarboxylate (**31**)

Following the general procedure D, starting from dimethyl dimethyl 2-phenylcycloprop-2-ene-1,1-dicarboxylate (**7**) (70 mg, 0.30 mmol, 1.0 equiv.) and *N*-cyclopropylpyridin-3-amine (**97**) (73 mg, 0.54 mmol, 1.8 equiv.), the title compound **31** (56:44 *dr* in the crude <sup>1</sup>H NMR) was obtained as a separable mixture of two diastereoisomers after purification by column chromatography on Biotage (SNAP cartridge KP-SIL 25 g, Pentane:EtOAc 85:15 to 80:20).

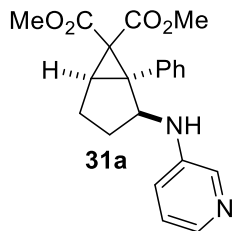

**31a**, major diastereoisomer, yellow oil (54 mg, 0.15 mmol, 49 % yield). **R<sub>f</sub>** 0.25 (Pentane:EtOAc 30:70); **<sup>1</sup>H NMR (400 MHz, Chloroform-*d*)**  $\delta$  7.90 (d, *J* = 2.9 Hz, 1H, HetArH), 7.80 (d, *J* = 4.7 Hz, 1H, HetArH), 7.31 – 7.27 (m, 2H, ArH), 7.25 – 7.14 (m, 3H, ArH), 6.89 (dd, *J* = 8.4, 4.6 Hz, 1H, HetArH), 6.62 (d, *J* = 8.1 Hz, 1H, HetArH), 5.34 (d, *J* = 10.7 Hz, 1H, NH), 4.43 (td, *J* = 10.1, 7.4 Hz, 1H, CHNH), 3.89 (s, 3H, COOCH<sub>3</sub>), 3.43 (s, 3H, COOCH<sub>3</sub>), 2.68 (d, *J* = 4.2 Hz, 1H,

CHCH<sub>2</sub>), 2.37 – 2.15 (m, 3H, NHCHCH<sub>2</sub> and NHCHCH<sub>2</sub>CH<sub>2</sub>), 1.03 – 0.91 (m, 1H, NHCHCH<sub>2</sub>); <sup>13</sup>C NMR (101 MHz, Chloroform-*d*) δ 170.3, 167.6, 144.1, 138.2, 137.5, 136.4, 128.9, 128.4, 127.6, 123.6, 119.0, 63.3, 53.5, 52.8, 50.3, 42.1, 35.0, 28.1, 24.5; IR  $\tilde{\nu}_{\text{max}}$  3369 (w), 3032 (w), 2954 (w), 1730 (s), 1587 (s), 1515 (m), 1438 (m), 1306 (s), 1237 (s), 1189 (m), 1129 (m), 1121 (m), 1077 (w), 1009 (w), 916 (m), 791 (m), 730 (s), 702 (s), 645 (w); HRMS (ESI) calcd for C<sub>21</sub>H<sub>23</sub>N<sub>2</sub>O<sub>4</sub><sup>+</sup> [M+H]<sup>+</sup> 367.1652; found 367.1649.

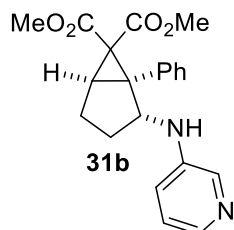

**31b**, minor diastereoisomer, yellow oil (36 mg, 0.098 mmol, 33 % yield). *R<sub>f</sub>* 0.20 (Pentane:EtOAc 30:70); <sup>1</sup>H NMR (400 MHz, Chloroform-*d*) δ 7.86 (dd, *J* = 4.7, 1.3 Hz, 1H, HetAr*H*), 7.75 (d, *J* = 2.9 Hz, 1H, HetAr*H*), 7.39 – 7.26 (m, 3H, Ar*H*), 7.24 – 7.18 (m, 2H, Ar*H*), 6.95 (dd, *J* = 8.3, 4.7 Hz, 1H, HetAr*H*), 6.66 (ddd, *J* = 8.7, 2.9, 1.4 Hz, 1H, HetAr*H*), 4.36 (t, *J* = 6.0 Hz, 1H, CHNH), 3.88 (s, 3H, COOCH<sub>3</sub>), 3.62 (d, *J* = 5.4 Hz, 1H, NH), 3.37 (s, 3H, COOCH<sub>3</sub>), 2.92 (d, *J* = 4.4 Hz, 1H, CHCH<sub>2</sub>), 2.41 – 2.29 (m, 1H, NHCHCH<sub>2</sub>CH<sub>2</sub>), 2.16 (dd, *J* = 13.6, 8.4 Hz, 1H, NHCHCH<sub>2</sub>CH<sub>2</sub>), 1.86 (dd, *J* = 15.0, 9.4 Hz, 1H, NHCHCH<sub>2</sub>), 1.52 – 1.39 (m, 1H, NHCHCH<sub>2</sub>); <sup>13</sup>C NMR (101 MHz, Chloroform-*d*) δ 167.9, 167.2, 142.9, 138.7, 136.4, 134.5, 129.8, 128.9, 128.1, 123.6, 119.3, 58.7, 53.2, 52.8, 50.9, 42.6, 36.4, 30.2, 24.8; IR  $\tilde{\nu}_{\text{max}}$  3396 (w), 3262 (w), 3036 (w), 2954 (w), 1736 (s), 1583 (s), 1480 (m), 1434 (m), 1306 (s), 1253 (s), 1203 (s), 1117 (s), 1070 (w), 1014 (w), 910 (m), 794 (m), 735 (s), 702 (s), 644 (w); HRMS (ESI) calcd for C<sub>21</sub>H<sub>23</sub>N<sub>2</sub>O<sub>4</sub><sup>+</sup> [M+H]<sup>+</sup> 367.1652; found 367.1647.

### Dimethyl 2-((3,5-bis(trifluoromethyl)phenyl)amino)-1-phenylbicyclo[3.1.0]hexane-6,6-dicarboxylate (**32**)

Following the general procedure D, starting from dimethyl dimethyl 2-phenylcycloprop-2-ene-1,1-dicarboxylate (**7**) (70 mg, 0.30 mmol, 1.0 equiv.) and *N*-cyclopropyl-3,5-bis(trifluoromethyl)aniline (**98**) (0.15 g, 0.54 mmol, 1.8 equiv.), the title compound **32** (58:42 *dr* in the crude <sup>1</sup>H NMR) was obtained as a separable mixture of two diastereoisomers after purification by column chromatography on Biotage (SNAP cartridge KP-SIL 25 g, Pentane:Et<sub>2</sub>O 90:10 to 85:15).

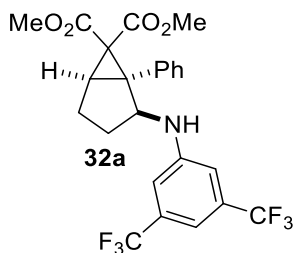

**32a**, major diastereoisomer, colorless oil (69 mg, 0.14 mmol, 46 % yield). *R<sub>f</sub>* 0.42 (Pentane:Et<sub>2</sub>O 75:25); <sup>1</sup>H NMR (400 MHz, Chloroform-*d*) δ 7.29 – 7.25 (m, 2H, Ar*H*), 7.24 – 7.18 (m, 3H,

ArH), 6.97 (s, 1H, ArH), 6.70 (s, 2H, ArH), 5.78 (d,  $J = 10.5$  Hz, 1H, NH), 4.49 (q,  $J = 9.5$  Hz, 1H, CHNH), 3.90 (s, 3H, OCH<sub>3</sub>), 3.44 (s, 3H, OCH<sub>3</sub>), 2.70 (d,  $J = 4.5$  Hz, 1H, CHCH<sub>2</sub>), 2.39 – 2.19 (m, 3H, NHCHCH<sub>2</sub> and NHCHCH<sub>2</sub>CH<sub>2</sub>), 1.08 – 0.94 (m, 1H, NHCHCH<sub>2</sub>); **<sup>13</sup>C NMR (101 MHz, Chloroform-*d*)**  $\delta$  170.6, 167.5, 148.8, 137.2, 132.2 (q,  $J = 32.6$  Hz), 128.8, 128.6, 127.8, 123.6 (q,  $J = 272.5$  Hz), 112.6 – 112.1 (m), 109.7 (p,  $J = 4.1$  Hz), 63.4, 53.6, 52.9, 50.2, 42.2, 35.3, 28.1, 24.5; **<sup>19</sup>F NMR (376 MHz, Chloroform-*d*)**  $\delta$  -63.3; **IR**  $\tilde{\nu}_{\text{max}}$  3377 (w), 3031 (w), 2957 (w), 1725 (m), 1622 (m), 1529 (w), 1478 (w), 1439 (m), 1394 (m), 1276 (s), 1178 (s), 1122 (s), 994 (w), 912 (m), 861 (m), 733 (s), 700 (s), 682 (m), 639 (w); **HRMS (ESI)** calcd for C<sub>24</sub>H<sub>22</sub>F<sub>6</sub>NO<sub>4</sub><sup>+</sup> [M+H]<sup>+</sup> 502.1448; found 502.1451.

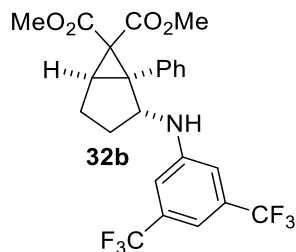

**32b**, minor diastereoisomer, yellow oil (38 mg, 0.076 mmol, 25 % yield). **R<sub>f</sub>** 0.28 (Pentane:Et<sub>2</sub>O 75:25); **<sup>1</sup>H NMR (400 MHz, Chloroform-*d*)**  $\delta$  7.40 – 7.34 (m, 1H, ArH), 7.33 – 7.27 (m, 1H, ArH), 7.26 – 7.19 (m, 3H, ArH), 7.03 (s, 1H, ArH), 6.66 (s, 2H, ArH), 4.44 (d,  $J = 6.1$  Hz, 1H, CHNH), 3.95 (bs, 1H, NH), 3.90 (s, 3H, OCH<sub>3</sub>), 3.39 (s, 3H, OCH<sub>3</sub>), 2.93 (d,  $J = 4.4$  Hz, 1H, CHCH<sub>2</sub>), 2.34 (dddd,  $J = 14.0, 10.9, 9.4, 4.6$  Hz, 1H, NHCHCH<sub>2</sub>CH<sub>2</sub>), 2.19 (dd,  $J = 13.7, 8.4$  Hz, 1H, NHCHCH<sub>2</sub>CH<sub>2</sub>), 1.85 (dd,  $J = 15.1, 9.4$  Hz, 1H, NHCHCH<sub>2</sub>), 1.56 – 1.49 (m, 1H, NHCHCH<sub>2</sub>); **<sup>13</sup>C NMR (101 MHz, Chloroform-*d*)**  $\delta$  167.9, 167.1, 147.3, 134.3, 132.2 (q,  $J = 32.6$  Hz), 129.9, 129.7, 129.0, 128.3, 128.2, 123.6 (q,  $J = 272.6$  Hz), 112.9 – 112.3 (m), 110.4 (p,  $J = 3.9$  Hz), 58.8, 53.3, 52.9, 50.7, 42.7, 36.3, 30.1, 24.8; **<sup>19</sup>F NMR (376 MHz, Chloroform-*d*)**  $\delta$  -63.2; **IR**  $\tilde{\nu}_{\text{max}}$  3393 (w), 3033 (w), 2955 (w), 1731 (m), 1622 (w), 1521 (w), 1478 (w), 1439 (w), 1396 (m), 1276 (s), 1171 (s), 1124 (s), 1005 (w), 912 (w), 861 (w), 729 (w), 700 (m), 682 (w); **HRMS (ESI)** calcd for C<sub>24</sub>H<sub>21</sub>F<sub>6</sub>NNaO<sub>4</sub><sup>+</sup> [M+Na]<sup>+</sup> 524.1267; found 524.1277.

### Dimethyl 2-(naphthalen-1-ylamino)-1-phenylbicyclo[3.1.0]hexane-6,6-dicarboxylate (**33**)

Following the general procedure D, starting from dimethyl dimethyl 2-phenylcycloprop-2-ene-1,1-dicarboxylate (**7**) (70 mg, 0.30 mmol, 1.0 equiv.) and *N*-cyclopropylnaphthalen-1-amine (**99**) (99 mg, 0.54 mmol, 1.8 equiv.), the title compound **33** (61:39 *dr* in the crude <sup>1</sup>H NMR) was obtained as a separable mixture of two diastereoisomers after purification by column chromatography on Biotage (SNAP cartridge KP-SIL 25 g, Pentane:Et<sub>2</sub>O 95:5 to 90:10).

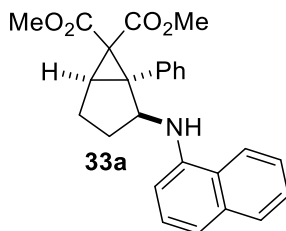

**33a**, major diastereoisomer, colorless oil (59 mg, 0.14 mmol, 47 % yield).  $R_f$  0.44 (Pentane:Et<sub>2</sub>O 80:20);  $^1\text{H}$  NMR (400 MHz, Chloroform-*d*)<sup>23</sup>  $\delta$  8.11 (d,  $J$  = 8.4 Hz, 1H, Ar*H*), 7.74 (d,  $J$  = 7.5 Hz, 1H, Ar*H*), 7.51 (ddd,  $J$  = 8.4, 6.8, 1.5 Hz, 1H, Ar*H*), 7.44 (ddd,  $J$  = 8.0, 6.8, 1.2 Hz, 1H, Ar*H*), 7.37 (dt,  $J$  = 6.0, 1.6 Hz, 2H, Ar*H*), 7.23 – 7.07 (m, 5H, Ar*H*), 6.31 (d,  $J$  = 7.5 Hz, 1H, Ar*H*), 4.63 (dd,  $J$  = 10.2, 8.2 Hz, 1H, CHNH), 3.89 (s, 3H, OCH<sub>3</sub>), 3.46 (s, 3H, OCH<sub>3</sub>), 2.73 (d,  $J$  = 4.5 Hz, 1H, CHCH<sub>2</sub>), 2.51 (dt,  $J$  = 14.4, 8.5 Hz, 1H, NHCHCH<sub>2</sub>CH<sub>2</sub>), 2.42 – 2.24 (m, 2H, NHCHCH<sub>2</sub> and NHCHCH<sub>2</sub>CH<sub>2</sub>), 1.04 – 0.91 (m, 1H, NHCHCH<sub>2</sub>);  $^{13}\text{C}$  NMR (101 MHz, Chloroform-*d*)  $\delta$  170.5, 167.8, 143.3, 137.7, 134.5, 129.0, 128.6, 128.3, 127.4, 126.5, 125.8, 124.9, 123.9, 120.8, 116.8, 104.3, 63.5, 53.6, 52.9, 50.6, 42.3, 34.9, 27.9, 24.8; IR  $\tilde{\nu}_{\text{max}}$  3391 (s), 3052 (s), 2955 (s), 1731 (s), 1580 (s), 1534 (s), 1490 (s), 1440 (s), 1407 (s), 1306 (s), 1233 (s), 1128 (s), 1080 (s), 1015 (s), 911 (s), 772 (s), 730 (s), 699 (s); HRMS (ESI) calcd for C<sub>26</sub>H<sub>26</sub>NO<sub>4</sub><sup>+</sup> [M+H]<sup>+</sup> 416.1856; found 416.1858.

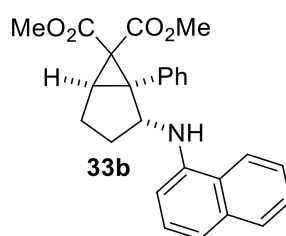

**33b**, minor diastereoisomer, colorless oil (36 mg, 0.087 mmol, 29 % yield).  $R_f$  0.40 (Pentane:Et<sub>2</sub>O 80:20);  $^1\text{H}$  NMR (400 MHz, Chloroform-*d*)<sup>23</sup>  $\delta$  7.71 (d,  $J$  = 8.0 Hz, 1H, Ar*H*), 7.53 (d,  $J$  = 7.8 Hz, 1H, Ar*H*), 7.49 – 7.42 (m, 2H, Ar*H*), 7.36 (ddd,  $J$  = 8.0, 6.7, 1.2 Hz, 1H, Ar*H*), 7.31 – 7.27 (m, 2H, Ar*H*), 7.24 (d,  $J$  = 1.7 Hz, 2H, Ar*H*), 7.21 – 7.17 (m, 2H, Ar*H*), 6.52 (d,  $J$  = 7.5 Hz, 1H, Ar*H*), 4.48 (d,  $J$  = 5.7 Hz, 1H, CHNH), 3.92 (s, 3H, OCH<sub>3</sub>), 3.41 (s, 3H, OCH<sub>3</sub>), 3.01 (d,  $J$  = 4.4 Hz, 1H, CHCH<sub>2</sub>), 2.51 – 2.36 (m, 1H, NHCHCH<sub>2</sub>CH<sub>2</sub>), 2.20 (dd,  $J$  = 13.5, 8.3 Hz, 1H, NHCHCH<sub>2</sub>CH<sub>2</sub>), 2.08 (dd,  $J$  = 14.9, 9.5 Hz, 1H, NHCHCH<sub>2</sub>), 1.51 – 1.41 (m, 1H, NHCHCH<sub>2</sub>);  $^{13}\text{C}$  NMR (101 MHz, Chloroform-*d*)  $\delta$  168.1, 167.5, 141.8, 134.8, 134.3, 129.9, 129.7, 129.3, 128.7, 128.3, 128.3, 126.4, 125.8, 124.9, 124.0, 119.7, 117.9, 105.6, 59.1, 53.2, 52.8, 51.1, 42.4, 36.8, 29.5, 25.1; IR  $\tilde{\nu}_{\text{max}}$  3420 (w), 3060 (w), 2953 (m), 1733 (s), 1580 (m), 1526 (m), 1476 (m), 1440 (m), 1407 (m), 1254 (s), 1210 (m), 1126 (m), 1019 (w), 908 (m), 770 (m), 735 (s), 703 (m); HRMS (ESI) calcd for C<sub>26</sub>H<sub>25</sub>NNaO<sub>4</sub><sup>+</sup> [M+Na]<sup>+</sup> 438.1676; found 438.1680.

#### Dimethyl 2-((4-methoxyphenyl)amino)-1-phenylbicyclo[3.1.0]hexane-6,6-dicarboxylate (34)

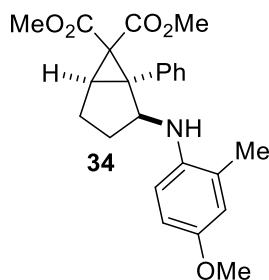

Following the general procedure D, starting from dimethyl dimethyl 2-phenylcycloprop-2-ene-1,1-dicarboxylate (**7**) (70 mg, 0.30 mmol, 1.0 equiv.) and *N*-cyclopropyl-4-methoxy-2-

methylaniline (**100**) (96 mg, 0.54 mmol, 1.8 equiv.), the title compound **34** (57:43 *dr* in the crude  $^1\text{H}$  NMR) was obtained as an inseparable mixture of two diastereoisomers after purification by column chromatography on Biotage (SNAP cartridge KP-SIL 25 g, Pentane:Et<sub>2</sub>O:DCM 85:10:5) and as a yellow oil (87 mg, 0.21 mmol, 71% yield). **R<sub>f</sub>** 0.40 (Pentane:Et<sub>2</sub>O:DCM 70:20:10);  $^1\text{H}$  NMR (400 MHz, Chloroform-*d*)<sup>23</sup> major diastereoisomer  $\delta$  7.33 – 7.27 (m, 2H, ArH), 7.23 – 7.13 (m, 3H, ArH), 6.66 – 6.63 (m, 1H, ArH), 6.48 (d, *J* = 3.0 Hz, 1H, ArH), 6.25 (d, *J* = 8.8 Hz, 1H, ArH), 4.37 (t, *J* = 9.1 Hz, 1H, CHNH), 3.86 (s, 3H, COOCH<sub>3</sub>), 3.68 (s, 3H, OCH<sub>3</sub>), 3.42 (s, 3H, COOCH<sub>3</sub>), 2.65 (d, *J* = 4.4 Hz, 1H, CHCH<sub>2</sub>), 2.46 – 2.35 (m, 1H, NHCHCH<sub>2</sub>CH<sub>2</sub>), 2.27 (s, 3H, CH<sub>3</sub>), 2.23 (dd, *J* = 9.3, 1.7 Hz, 1H, NHCHCH<sub>2</sub>), 2.20 – 2.11 (m, 1H, NHCHCH<sub>2</sub>CH<sub>2</sub>), 0.97 – 0.80 (m, 1H, NHCHCH<sub>2</sub>); minor diastereoisomer  $\delta$  7.43 – 7.35 (m, 3H, ArH), 7.32 – 7.30 (m, 2H, ArH), 6.64 – 6.62 (m, 1H, ArH), 6.57 (d, *J* = 2.8 Hz, 1H, ArH), 6.50 (d, *J* = 3.0 Hz, 1H, ArH), 4.22 (d, *J* = 5.7 Hz, 1H, CHNH), 3.88 (s, 3H, COOCH<sub>3</sub>), 3.70 (s, 3H, OCH<sub>3</sub>), 3.39 (s, 3H, COOCH<sub>3</sub>), 2.94 (d, *J* = 4.3 Hz, 1H, CHCH<sub>2</sub>), 2.39 – 2.34 (m, 1H, NHCHCH<sub>2</sub>CH<sub>2</sub>), 2.24 – 2.21 (m, 1H, NHCHCH<sub>2</sub>CH<sub>2</sub>), 2.01 – 1.90 (m, 1H, NHCHCH<sub>2</sub>), 1.63 (s, 3H, CH<sub>3</sub>), 1.43 – 1.31 (m, 1H, NHCHCH<sub>2</sub>);  $^{13}\text{C}$  NMR (101 MHz, Chloroform-*d*) major diastereoisomer  $\delta$  170.3, 167.8, 137.8, 130.0, 129.8, 129.4, 128.9, 128.3, 128.2, 127.3, 117.0, 111.6, 64.5, 55.9, 53.5, 52.8, 51.0, 42.4, 36.9, 28.2, 24.6, 18.2; minor diastereoisomer  $\delta$  168.0, 167.4, 137.8, 130.0, 129.3, 129.1, 128.9, 128.3, 128.2, 127.3, 117.2, 111.4, 64.5, 55.9, 53.1, 52.7, 50.5, 42.1, 34.9, 29.8, 25.0, 17.3; IR  $\tilde{\nu}_{\text{max}}$  3391 (w), 2953 (m), 2844 (w), 1727 (s), 1511 (s), 1435 (m), 1225 (s), 1120 (s), 1054 (w), 910 (m), 733 (s), 700 (m); HRMS (ESI) calcd for C<sub>24</sub>H<sub>28</sub>NO<sub>5</sub><sup>+</sup> [M+H]<sup>+</sup> 410.1962; found 410.1957.

#### Dimethyl 2-((4-methoxy-2,6-dimethylphenyl)amino)-1-phenylbicyclo[3.1.0]hexane-6,6-dicarboxylate (**35**)

Following the general procedure D, starting from dimethyl dimethyl 2-phenylcycloprop-2-ene-1,1-dicarboxylate (**7**) (70 mg, 0.30 mmol, 1.0 equiv.) and *N*-cyclopropyl-4-methoxy-2,6-dimethylaniline (**37**) (0.10 g, 0.54 mmol, 1.8 equiv.), the title compound **35** (84:16 *dr* in the crude  $^1\text{H}$  NMR) was obtained as a separable mixture of two diastereoisomers after purification by column chromatography on Biotage (SNAP cartridge KP-SIL 25 g, Pentane:Et<sub>2</sub>O 95:5 to 85:15).

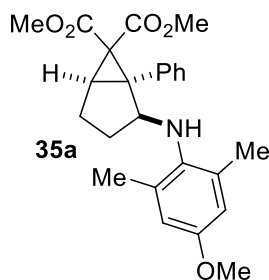

**35a**, major diastereoisomer, pale yellow oil (29 mg, 0.068 mmol, 23 % yield). **R<sub>f</sub>** 0.42 (Pentane:Et<sub>2</sub>O 70:30);  $^1\text{H}$  NMR (400 MHz, Chloroform-*d*)  $\delta$  7.35 – 7.26 (m, 2H, ArH), 7.23 – 7.18 (m, 2H, ArH), 7.17 – 7.12 (m, 1H, ArH), 6.35 (s, 2H, ArH), 4.15 (bs, 1H, NH), 3.84 (s, 4H, COOCH<sub>3</sub> & CHNH), 3.60 (s, 3H, OCH<sub>3</sub>), 3.37 (s, 3H, COOCH<sub>3</sub>), 2.55 – 2.50 (m, 1H, CHCH<sub>2</sub>), 2.11 – 2.02 (m, 2H, NHCHCH<sub>2</sub>CH<sub>2</sub>), 1.81 (m, 7H, NHCHCH<sub>2</sub> & CH<sub>3</sub>), 1.07 – 0.87 (m, 1H, NHCHCH<sub>2</sub>);  $^{13}\text{C}$  NMR (101 MHz, Chloroform-*d*)  $\delta$  170.5, 168.1, 154.2, 138.9, 138.3, 131.4, 129.5, 128.0, 127.2, 114.1, 68.5, 55.4, 53.4, 52.8, 50.7, 41.8, 34.5, 28.5, 24.2, 18.8; IR  $\tilde{\nu}_{\text{max}}$  3376

(w), 2952 (m), 2842 (w), 1727 (s), 1602 (w), 1485 (s), 1434 (s), 1306 (s), 1219 (s), 1194 (m), 1150 (m), 1123 (s), 1064 (s), 1003 (w), 910 (m), 850 (w), 762 (m), 731 (s), 700 (s), 649 (w); **HRMS (ESI)** calcd for  $C_{25}H_{30}NO_5^+$   $[M + H]^+$  424.2118; Found 424.2114.

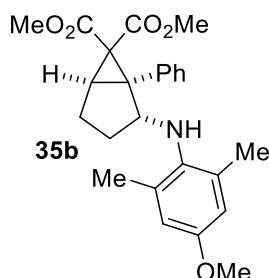

**35b**, minor diastereoisomer, pale yellow oil (4 mg, 0.009 mmol, 3 % yield).  $R_f$  0.37 (Pentane:Et<sub>2</sub>O 70:30); **<sup>1</sup>H NMR (400 MHz, Chloroform-*d*)**<sup>23</sup>  $\delta$  7.57 – 7.51 (m, 1H, ArH), 7.33 – 7.29 (m, 2H, ArH), 7.26 – 7.22 (m, 2H, ArH), 6.49 (s, 2H, ArH), 4.18 (d,  $J$  = 5.9 Hz, 1H, CHNH), 3.78 (s, 3H, COOCH<sub>3</sub>), 3.70 (s, 3H, OCH<sub>3</sub>), 3.35 (s, 3H, COOCH<sub>3</sub>), 2.95 (d,  $J$  = 4.2 Hz, 1H, CHCH<sub>2</sub>), 2.52 – 2.38 (m, 1H, NHCHCH<sub>2</sub>CH<sub>2</sub>), 2.12 (m, 7H, NHCHCH<sub>2</sub>CH<sub>2</sub> & CH<sub>3</sub>), 1.65 – 1.57 (m, 1H, NHCHCH<sub>2</sub>), 1.05 – 0.91 (m, 1H, NHCHCH<sub>2</sub>); **<sup>13</sup>C NMR (101 MHz, Chloroform-*d*)**  $\delta$  168.2, 167.5, 133.3, 130.3, 129.7, 128.8, 128.4, 127.9, 127.7, 114.1, 62.5, 55.4, 53.0, 52.7, 51.6, 42.6, 36.1, 27.6, 24.9, 19.3; **IR**  $\tilde{\nu}_{max}$  3362 (w), 2951 (m), 2871 (w), 1739 (s), 1602 (w), 1481 (m), 1442 (m), 1314 (m), 1248 (s), 1212 (s), 1150 (m), 1124 (m), 1065 (m), 1011 (w), 914 (m), 854 (w), 731 (m), 702 (m), 611 (w); **HRMS (ESI)** calcd for  $C_{25}H_{30}NO_5^+$   $[M + H]^+$  424.2118; Found 424.2120.

#### 6,6-Difluoro-*N*-(4-methoxy-2,6-dimethylphenyl)-1-(*p*-tolyl)bicyclo[3.1.0]hexan-2-amine (**36**)

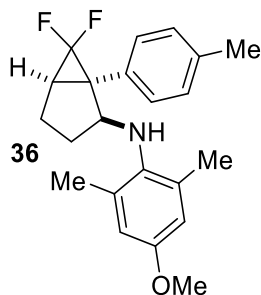

Following the general procedure D, starting from 1-(3,3-difluorocycloprop-1-en-1-yl)-4-methylbenzene (**66**) (50 mg, 0.30 mmol, 1.0 equiv.) and *N*-cyclopropyl-4-methoxy-2,6-dimethylaniline (**37**) (0.10 g, 0.54 mmol, 1.8 equiv.), the title compound **36** (93:7 *dr* in the crude <sup>19</sup>F NMR) was obtained after purification by column chromatography on Biotage (SNAP cartridge KP-SIL 25 g, Pentane:Et<sub>2</sub>O 95:5 to 90:10) as a yellow oil and as a mixture of diastereoisomers (61 mg, 0.14 mmol, 57% yield).  $R_f$  0.45 (Pentane:Et<sub>2</sub>O 90:10); **<sup>1</sup>H NMR (400 MHz, Chloroform-*d*)**  $\delta$  7.22 (d,  $J$  = 8.0 Hz, 2H, ArH), 7.07 (d,  $J$  = 7.7 Hz, 2H, ArH), 6.44 (s, 2H, ArH), 4.20 (dd,  $J$  = 16.4, 8.0 Hz, 1H, CHNH), 3.70 (s, 3H, OMe), 3.23 (bs, 1H, NH), 2.32 (s, 3H, CH<sub>3</sub>), 2.24 – 2.18 (m, 2H, CF<sub>2</sub>CHCH<sub>2</sub>), 2.09 – 2.07 (m, 1H, CF<sub>2</sub>CH), 2.06 (s, 6H, CH<sub>3</sub>), 2.06 – 2.02 (m, 1H, NHCHCH<sub>2</sub>), 1.70 – 1.59 (m, 1H, NHCHCH<sub>2</sub>); **<sup>13</sup>C NMR (101 MHz, Chloroform-*d*)**  $\delta$  154.4, 138.1, 137.0, 132.5, 130.6, 129.1, 128.9, 115.7 (Hidden dd, one

measurable constant:  $J = 281.8$  Hz), 114.1, 67.8, 55.5, 44.8 (dd,  $J = 11.9, 8.1$  Hz), 34.4 (dd,  $J = 12.6, 9.0$  Hz), 31.4 (d,  $J = 7.5$  Hz), 24.2, 21.3, 19.0;  **$^{19}\text{F}$  NMR (376 MHz, Chloroform-*d*)**  $\delta$  -123.3 (dd,  $J = 160.8, 14.1$  Hz, *Major diastereoisomer*), -124.8 (dd,  $J = 157.3, 18.5$  Hz, *Minor diastereoisomer*), -137.6 (d,  $J = 160.0$  Hz, *Major diastereoisomer*), -141.3 (d,  $J = 157.6$  Hz, *Minor diastereoisomer*); **IR**  $\tilde{\nu}_{\text{max}}$  3382 (w), 2946 (m), 2251 (w), 1902 (w), 1728 (w), 1607 (m), 1517 (m), 1484 (s), 1440 (s), 1378 (w), 1317 (m), 1223 (s), 1194 (s), 1149 (s), 1106 (m), 1065 (s), 1029 (m), 984 (s), 984 (s), 939 (m), 912 (s), 855 (m), 812 (s), 734 (s), 693 (m), 669 (w), 650 (m); **HRMS (ESI)** calcd for  $\text{C}_{22}\text{H}_{26}\text{F}_2\text{NO}^+$   $[\text{M}+\text{H}]^+$  358.1977; found 358.1984.

Following the general procedure E, starting from 1-(3,3-difluorocycloprop-1-en-1-yl)-4-methylbenzene (**63**) (50 mg, 0.30 mmol, 1.0 equiv), the title compound **35** (93:7 *dr* in the crude  $^{19}\text{F}$  NMR) was obtained after purification by column chromatography on Biotage (SNAP cartridge KP-SIL 25 g, Pentane:Et<sub>2</sub>O 95:5 to 90:10) as a yellow oil and as a mixture of diastereoisomers (78 mg, 0.22 mmol, 73% yield). With this procedure the characterization was the same as described above.

**1-(4-Bromophenyl)-6,6-difluoro-*N*-(4-methoxy-2,6-dimethylphenyl)bicyclo[3.1.0]hexan-2-amine (38)**

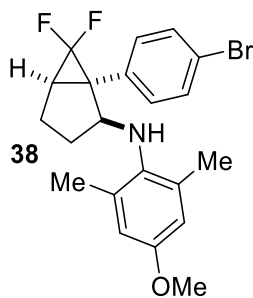

Following the general procedure E, starting from 1-bromo-4-(3,3-difluorocycloprop-1-en-1-yl)benzene (**73**) (69 mg, 0.30 mmol, 1.0 equiv.), the title compound **38** (93:7 *dr* in the crude  $^{19}\text{F}$  NMR) was obtained after purification by column chromatography on Biotage (SNAP cartridge KP-SIL 25 g, Pentane:Et<sub>2</sub>O 95:5 to 90:10) as a colorless oil and as a single diastereoisomer (100 mg, 0.24 mmol, 79 % yield).  $R_f$  0.37 (Pentane:Et<sub>2</sub>O 90:10);  **$^1\text{H}$  NMR (400 MHz, Chloroform-*d*)**  $\delta$  7.36 (d,  $J = 8.4$  Hz, 2H, *ArH*), 7.16 (d,  $J = 8.4$  Hz, 2H, *ArH*), 6.43 (s, 2H, *ArH*), 4.20 (dt,  $J = 9.5, 7.2$  Hz, 1H, *CHNH*), 3.70 (s, 3H, OMe), 3.28 (bs, 1H, *NH*), 2.27 – 2.10 (m, 3H,  $\text{CF}_2\text{CHCH}_2$  &  $\text{NHCHCH}_2$ ), 2.06 (m, 7H,  $\text{CF}_2\text{CH}$  &  $\text{CH}_3$ ), 1.70 – 1.58 (m, 1H,  $\text{NHCHCH}_2$ );  **$^{13}\text{C}$  NMR (101 MHz, Chloroform-*d*)**  $\delta$  154.6, 137.8, 134.7, 131.3, 130.9, 130.5, 121.3, 116.7 (dd,  $J = 302.8, 281.9$  Hz), 114.2, 67.6, 55.5, 44.6 (dd,  $J = 12.1, 7.8$  Hz), 34.6 (dd,  $J = 12.6, 9.0$  Hz), 31.4 (d,  $J = 7.7$  Hz), 24.2, 19.0;  **$^{19}\text{F}$  NMR (376 MHz, Chloroform-*d*)**  $\delta$  -123.1 (dd,  $J = 161.7, 13.9$  Hz), -137.7 (d,  $J = 161.3$  Hz); **IR**  $\tilde{\nu}_{\text{max}}$  3373 (w), 2951 (m), 2830 (w), 1604 (w), 1489 (s), 1313 (m), 1287 (m), 1227 (s), 1196 (s), 1153 (s), 1106 (m), 1062 (s), 1013 (m), 986 (s), 945 (w), 912 (w), 822 (s), 741 (m); **HRMS (ESI)** calcd for  $\text{C}_{21}\text{H}_{23}^{79}\text{BrF}_2\text{NO}^+$   $[\text{M}+\text{H}]^+$  422.0926; found 422.0928.



**6,6-Difluoro-*N*-(4-methoxy-2,6-dimethylphenyl)-1-(4-methoxyphenyl)bicyclo[3.1.0]hexan-2-amine (39)**

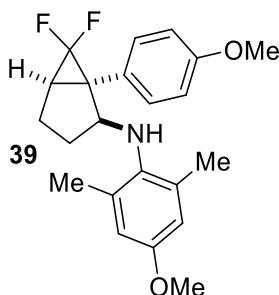

Following the general procedure E, starting from 1-(3,3-difluorocycloprop-1-en-1-yl)-4-methoxybenzene (**74**) (55 mg, 0.30 mmol, 1.0 equiv.), the title compound **39** (93:7 *dr* in the crude  $^{19}\text{F}$  NMR) was obtained after purification by column chromatography on Biotage (SNAP cartridge KP-SIL 25 g, Pentane:Et<sub>2</sub>O 95:5 to 90:10) as a yellow oil and as a single diastereoisomer (68 mg, 0.18 mmol, 61 % yield). *R<sub>f</sub>* 0.28 (Pentane:Et<sub>2</sub>O 90:10);  $^1\text{H}$  NMR (400 MHz, Chloroform-*d*)  $\delta$  7.24 (d, *J* = 8.6 Hz, 2H, Ar*H*), 6.80 (d, *J* = 8.7 Hz, 2H, Ar*H*), 6.44 (s, 2H, Ar*H*), 4.18 (dt, *J* = 9.3, 7.3 Hz, 1H, CHNH), 3.78 (s, 3H, OMe), 3.70 (s, 3H, OMe), 3.25 (bs, 1H, NH), 2.25 – 2.17 (m, 2H, CF<sub>2</sub>CHCH<sub>2</sub> & NHCHCH<sub>2</sub>), 2.15 – 2.09 (m, 1H, CF<sub>2</sub>CHCH<sub>2</sub>), 2.08 – 2.00 (m, 7H, CF<sub>2</sub>CH & CH<sub>3</sub>), 1.67 – 1.56 (m, 1H, NHCHCH<sub>2</sub>);  $^{13}\text{C}$  NMR (101 MHz, Chloroform-*d*)  $\delta$  158.9, 154.4, 138.2, 130.6, 130.4, 127.6, 117.3 (dd, *J* = 302.4, 281.9 Hz), 114.1, 113.7, 67.9 (d, *J* = 2.1 Hz), 55.5, 55.4, 44.6 (dd, *J* = 11.9, 8.5 Hz), 34.4 (dd, *J* = 12.5, 8.9 Hz), 31.4 (d, *J* = 7.6 Hz), 24.2, 19.0;  $^{19}\text{F}$  NMR (376 MHz, Chloroform-*d*)  $\delta$  -123.3 (dd, *J* = 159.6, 13.6 Hz), -137.8 (d, *J* = 159.8 Hz); IR  $\tilde{\nu}_{\text{max}}$  3379 (w), 2958 (m), 2913 (w), 2836 (w), 1727 (w), 1614 (m), 1517 (s), 1484 (s), 1301 (m), 1247 (s), 1194 (s), 1151 (s), 1110 (w), 1066 (s), 1029 (m), 986 (m), 910 (m), 830 (m), 737 (m), 587 (w); HRMS (ESI) calcd for C<sub>22</sub>H<sub>26</sub>F<sub>2</sub>NO<sub>2</sub><sup>+</sup> [M+H]<sup>+</sup> 374.1926; found 374.1929.

**6,6-Difluoro-*N*-(4-methoxy-2,6-dimethylphenyl)-1-(4-(trifluoromethyl)phenyl)bicyclo[3.1.0]hexan-2-amine (40)**

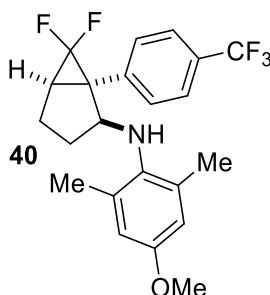

Following the general procedure E, starting from 1-(3,3-difluorocycloprop-1-en-1-yl)-4-(trifluoromethyl)benzene (**85**) (66 mg, 0.30 mmol, 1.0 equiv.), the title compound **40** (93:7 *dr* in the crude  $^{19}\text{F}$  NMR) was obtained after purification by column chromatography on Biotage (SNAP cartridge KP-SIL 25 g, Pentane:Et<sub>2</sub>O 95:5 to 90:10) as a pale yellow oil and as a single diastereoisomer (95 mg, 0.23 mmol, 77 % yield). *R<sub>f</sub>* 0.20 (Pentane:Et<sub>2</sub>O 90:10);  $^1\text{H}$  NMR (400

**MHz, Chloroform-*d***)  $\delta$  7.49 (d,  $J$  = 8.1 Hz, 2H, ArH), 7.39 (d,  $J$  = 8.1 Hz, 2H, ArH), 6.41 (s, 2H, ArH), 4.26 (dt,  $J$  = 9.6, 6.9 Hz, 1H, CHNH), 3.68 (s, 3H, OCH<sub>3</sub>), 3.28 (bs, 1H, NH), 2.30 – 2.15 (m, 3H, NHCHCH<sub>2</sub> & CF<sub>2</sub>CHCH<sub>2</sub>), 2.10 (dd,  $J$  = 14.5, 3.9 Hz, 1H, CF<sub>2</sub>CH), 2.07 (s, 6H, CH<sub>3</sub>), 1.73 – 1.59 (m, 1H, NHCHCH<sub>2</sub>); **<sup>13</sup>C NMR (101 MHz, Chloroform-*d*)**  $\delta$  154.7, 139.8, 137.8, 130.4, 129.6, 129.3 (q,  $J$  = 32.8 Hz), 125.0 (q,  $J$  = 3.8 Hz), 124.3 (q,  $J$  = 272.1 Hz), 116.5 (dd,  $J$  = 303.0, 282.2 Hz), 114.1, 67.6, 55.4, 44.9 (dd,  $J$  = 12.3, 7.7 Hz), 34.9 (dd,  $J$  = 12.8, 9.2 Hz), 31.4 (d,  $J$  = 7.7 Hz), 24.2, 18.9; **<sup>19</sup>F NMR (376 MHz, Chloroform-*d*)**  $\delta$  -62.6, -122.9 (dd,  $J$  = 162.6, 14.4 Hz), -137.6 (d,  $J$  = 162.0 Hz); **IR**  $\tilde{\nu}_{\text{max}}$  3384 (w), 2950 (m), 2844 (w), 1611 (m), 1486 (s), 1448 (m), 1325 (s), 1201 (m), 1158 (s), 1126 (s), 1059 (s), 1017 (m), 985 (m), 949 (w), 913 (m), 837 (m), 734 (m), 702 (m); **HRMS (ESI)** calcd for C<sub>22</sub>H<sub>23</sub>F<sub>5</sub>NO<sup>+</sup> [M+H]<sup>+</sup> 412.1694; found 412.1705.

**6,6-Difluoro-*N*-(4-methoxy-2,6-dimethylphenyl)-1-(*m*-tolyl)bicyclo[3.1.0]hexan-2-amine (41)**

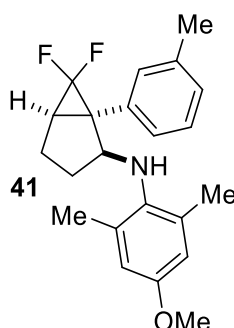

Following the general procedure E, starting from 1-(3,3-difluorocycloprop-1-en-1-yl)-3-methylbenzene (**86**) (50 mg, 0.30 mmol, 1.0 equiv.), the title compound **41** (94:6 *dr* in the crude <sup>19</sup>F NMR) was obtained after purification by column chromatography on Biotage (SNAP cartridge KP-SIL 25 g, Pentane:Et<sub>2</sub>O 95:5 to 90:10) as a pale yellow oil and as a mixture of diastereoisomers (80 mg, 0.22 mmol, 75 % yield). **R<sub>f</sub>** 0.38 (Pentane:Et<sub>2</sub>O 90:10); **<sup>1</sup>H NMR (400 MHz, Chloroform-*d*)**  $\delta$  7.17 – 7.01 (m, 4H, ArH), 6.43 (s, 2H, ArH), 4.24 (dt,  $J$  = 9.8, 6.9 Hz, 1H, CHNH), 3.70 (s, 3H, OMe), 3.26 (bs, 1H, NH), 2.27 (s, 3H, CH<sub>3</sub>), 2.24 – 2.11 (m, 3H, CF<sub>2</sub>CHCH<sub>2</sub> & NHCHCH<sub>2</sub>), 2.09 – 2.03 (m, 7H, CF<sub>2</sub>CH & CH<sub>3</sub>), 1.70 – 1.60 (m, 1H, NHCHCH<sub>2</sub>); **<sup>13</sup>C NMR (101 MHz, Chloroform-*d*)**  $\delta$  154.4, 138.1, 137.7, 135.5, 133.0, 130.5, 130.1, 128.1, 126.1 (d,  $J$  = 2.5 Hz), 117.2 (dd,  $J$  = 302.6, 282.2 Hz), 114.1, 67.8, 55.4, 45.2 (dd,  $J$  = 11.8, 8.1 Hz), 34.6 (dd,  $J$  = 12.6, 9.1 Hz), 31.6 (d,  $J$  = 7.7 Hz), 24.2, 21.4, 19.0; **<sup>19</sup>F NMR (376 MHz, Chloroform-*d*)**  $\delta$  -123.1 (dd,  $J$  = 160.6, 15.3 Hz, *Major diastereoisomer*), -124.7 (d,  $J$  = 158.0 Hz, *Minor diastereoisomer*), -137.5 (d,  $J$  = 160.9 Hz, *Major diastereoisomer*), -141.2 (d,  $J$  = 157.6 Hz, *Minor diastereoisomer*); **IR**  $\tilde{\nu}_{\text{max}}$  3379 (w), 3041 (w), 2945 (m), 1610 (m), 1486 (s), 1449 (s), 1319 (m), 1194 (s), 1157 (m), 1103 (w), 1068 (s), 1031 (m), 986 (m), 914 (m), 852 (m), 787 (m), 739 (m), 704 (s), 643 (w). **HRMS (ESI)** calcd for C<sub>22</sub>H<sub>26</sub>F<sub>2</sub>NO<sup>+</sup> [M+H]<sup>+</sup> 358.1977; found 358.1983.

**1-(3-Chlorophenyl)-6,6-difluoro-N-(4-methoxy-2,6-dimethylphenyl)bicyclo[3.1.0]hexan-2-amine (42)**

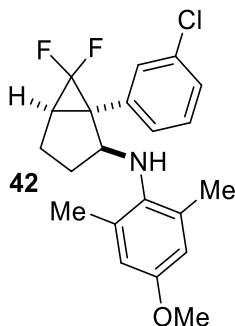

Following the general procedure E, starting from 1-chloro-3-(3,3-difluorocycloprop-1-en-1-yl)benzene (**75**) (56 mg, 0.30 mmol, 1.0 equiv.), the title compound **42** (92:8 *dr* in the crude  $^{19}\text{F}$  NMR) was obtained after purification by column chromatography on Biotage (SNAP cartridge KP-SIL 25 g, Pentane:Et<sub>2</sub>O 95:5 to 90:10) as a yellow oil and as a mixture of diastereoisomers (94 mg, 0.25 mmol, 83 % yield).  $R_f$  0.35 (Pentane:Et<sub>2</sub>O 90:10);  $^1\text{H}$  NMR (400 MHz, Chloroform-*d*)  $\delta$  7.26 – 7.24 (m, 1H, ArH), 7.22 – 7.14 (m, 3H, ArH), 6.43 (s, 2H, ArH), 4.22 (q,  $J$  = 8.1 Hz, 1H, CHNH), 3.70 (s, 3H, OMe), 3.23 (bs, 1H, NH), 2.29 – 2.15 (m, 3H, CF<sub>2</sub>CHCH<sub>2</sub> & NHCHCH<sub>2</sub>), 2.09 – 2.03 (m, 7H, CF<sub>2</sub>CH & CH<sub>3</sub>), 1.70 – 1.60 (m, 1H, NHCHCH<sub>2</sub>);  $^{13}\text{C}$  NMR (101 MHz, Chloroform-*d*)  $\delta$  154.6, 137.8, 137.7, 133.9, 130.5, 129.4 (d,  $J$  = 2.3 Hz), 129.4, 127.5, 127.5 (d,  $J$  = 2.3 Hz), 116.6 (dd,  $J$  = 302.8, 283.1 Hz), 114.2, 67.6 (d,  $J$  = 2.0 Hz), 55.4, 44.8 (dd,  $J$  = 12.1, 7.8 Hz), 34.8 (dd,  $J$  = 12.7, 9.2 Hz), 31.5 (d,  $J$  = 7.6 Hz), 24.1, 19.0;  $^{19}\text{F}$  NMR (376 MHz, Chloroform-*d*)  $\delta$  -123.1 (dd,  $J$  = 161.8, 14.6 Hz, Major diastereoisomer), -124.6 (ddd,  $J$  = 158.7, 14.2, 5.0 Hz, Minor diastereoisomer), -137.6 (d,  $J$  = 161.4 Hz, Major diastereoisomer), -141.1 (d,  $J$  = 158.0 Hz, Minor diastereoisomer); IR  $\tilde{\nu}_{\text{max}}$  3386 (w), 3047 (w), 2945 (m), 2843 (w), 1731 (w), 1599 (m), 1486 (s), 1322 (m), 1196 (s), 1153 (s), 1101 (m), 1071 (s), 1027 (w), 988 (m), 912 (m), 848 (m), 785 (m), 733 (s), 694 (m); HRMS (ESI) calcd for C<sub>21</sub>H<sub>23</sub>ClF<sub>2</sub>NO<sup>+</sup> [M+H]<sup>+</sup> 378.1431; found 378.1430.

**6,6-Difluoro-N-(4-methoxy-2,6-dimethylphenyl)-1-(3-nitrophenyl)bicyclo[3.1.0]hexan-2-amine (43)**

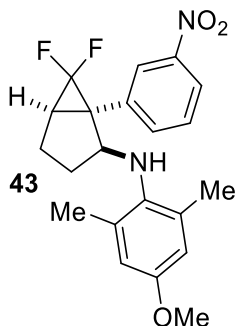

Following the general procedure E, starting from 1-(3,3-difluorocycloprop-1-en-1-yl)-3-nitrobenzene (**87**) (59 mg, 0.30 mmol, 1.0 equiv.), the title compound **43** (91:9 *dr* in the crude  $^{19}\text{F}$  NMR) was obtained after purification by column chromatography on Biotage (SNAP cartridge

KP-SIL 25 g, Pentane:Et<sub>2</sub>O 90:10 to 80:20) as a yellow oil and as a mixture of diastereoisomers (87 mg, 0.22 mmol, 75 % yield). **R<sub>f</sub>** 0.25 (Pentane:Et<sub>2</sub>O 70:30); **<sup>1</sup>H NMR (400 MHz, Chloroform-*d*)** δ 8.09 – 8.00 (m, 2H, *ArH*), 7.58 (dt, *J* = 7.8, 1.3 Hz, 1H, *ArH*), 7.37 (t, *J* = 7.9 Hz, 1H, *ArH*), 6.37 (s, 2H, *ArH*), 4.28 (dt, *J* = 9.7, 7.4 Hz, 1H, *CHNH*), 3.66 (s, 3H, *OCH*<sub>3</sub>), 3.26 (bs, 1H, *NH*), 2.33 – 2.20 (m, 3H, *NHCHCH*<sub>2</sub> & *CF*<sub>2</sub>*CHCH*<sub>2</sub>), 2.16 – 2.12 (m, 1H, *CF*<sub>2</sub>*CH*), 2.07 (s, 6H, *CH*<sub>3</sub>), 1.74 – 1.64 (m, 1H, *NHCHCH*<sub>2</sub>); **<sup>13</sup>C NMR (101 MHz, Chloroform-*d*)** δ 154.6, 148.0, 137.9, 137.5, 135.5, 130.3, 129.0, 124.1 (d, *J* = 2.6 Hz), 122.3, 116.2 (dd, *J* = 302.8, 281.9 Hz), 114.1, 67.5, 55.4, 44.7 (dd, *J* = 12.5, 7.6 Hz), 35.2 (dd, *J* = 12.7, 9.1 Hz), 31.3 (d, *J* = 7.7 Hz), 24.1, 18.9; **<sup>19</sup>F NMR (376 MHz, Chloroform-*d*)** δ -122.8 (dd, *J* = 162.8, 14.6 Hz, *Major diastereoisomer*), -124.4 (ddd, *J* = 159.2, 14.5, 4.6 Hz, *Minor diastereoisomer*), -137.9 (d, *J* = 162.8 Hz, *Major diastereoisomer*), -141.0 (d, *J* = 158.7 Hz, *Minor diastereoisomer*); **IR**  $\tilde{\nu}_{\text{max}}$  3377 (w), 3081 (w), 2951 (m), 1720 (w), 1603 (w), 1529 (s), 1486 (s), 1447 (m), 1349 (s), 1314 (m), 1197 (m), 1151 (s), 1102 (m), 1065 (s), 1032 (w), 989 (m), 915 (w), 857 (w), 809 (w), 737 (m), 687 (m); **HRMS (ESI)** calcd for C<sub>21</sub>H<sub>23</sub>F<sub>2</sub>N<sub>2</sub>O<sub>3</sub><sup>+</sup> [*M*+*H*]<sup>+</sup> 389.1671; found 389.1677.

**6,6-Difluoro-*N*-(4-methoxy-2,6-dimethylphenyl)-1-(2-methoxyphenyl)bicyclo[3.1.0]hexan-2-amine (44)**

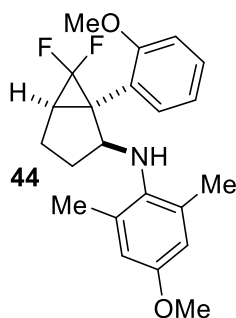

Following the general procedure E, starting from 1-(3,3-difluorocycloprop-1-en-1-yl)-2-methoxybenzene (**88**) (55 mg, 0.30 mmol, 1.0 equiv.), the title compound **44** (94:6 *dr* in the crude <sup>19</sup>F NMR) was obtained after purification by column chromatography on Biotage (SNAP cartridge KP-SIL 25 g, Pentane:Et<sub>2</sub>O 95:5 to 90:10) as a pale yellow oil and as a mixture of diastereoisomers (83 mg, 0.22 mmol, 74 % yield). **R<sub>f</sub>** 0.28 (Pentane:Et<sub>2</sub>O 90:10); **<sup>1</sup>H NMR (400 MHz, Chloroform-*d*)** δ 7.25 – 7.16 (m, 2H, *ArH*), 6.87 – 6.80 (m, 2H, *ArH*), 6.41 (s, 2H, *ArH*), 4.33 (dd, *J* = 16.5, 7.9 Hz, 1H, *CHNH*), 3.84 (s, 3H, *OCH*<sub>3</sub>), 3.69 (s, 3H, *OCH*<sub>3</sub>), 3.25 (bs, 1H, *NH*), 2.30 – 2.15 (m, 2H, *CF*<sub>2</sub>*CHCH*<sub>2</sub>), 2.12 – 2.06 (m, 1H, *NHCHCH*<sub>2</sub>), 2.03 (s, 6H, *CH*<sub>3</sub>), 1.96 (dd, *J* = 14.9, 5.2 Hz, 1H, *CF*<sub>2</sub>*CH*), 1.64 – 1.54 (m, 1H, *NHCHCH*<sub>2</sub>); **<sup>13</sup>C NMR (101 MHz, Chloroform-*d*)** δ 158.5, 154.2, 138.6, 131.9, 130.5, 128.7, 123.5, 120.3, 117.8 (dd, *J* = 302.7, 282.8 Hz), 114.0, 110.4, 65.7, 55.5, 55.4, 41.6 (dd, *J* = 12.6, 7.3 Hz), 35.1 (dd, *J* = 12.5, 8.8 Hz), 31.4 (d, *J* = 7.9 Hz), 24.2, 18.7; **<sup>19</sup>F NMR (376 MHz, Chloroform-*d*)** δ -122.7 (dd, *J* = 160.7, 17.3 Hz, *Major diastereoisomer*), -127.3 (ddd, *J* = 158.9, 14.0, 3.5 Hz, *Minor diastereoisomer*), -137.9 (d, *J* = 159.5 Hz, *Major diastereoisomer*), -141.8 (dd, *J* = 336.1, 156.5 Hz, *Minor diastereoisomer*); **IR**  $\tilde{\nu}_{\text{max}}$  3386 (w), 2947 (m), 2840 (m), 1606 (m), 1485 (s), 1435 (s), 1317 (m), 1241 (s), 1194 (s), 1148 (s), 1119 (m), 1065 (s), 1029 (s), 981 (s), 910 (s), 850 (m), 795 (w), 754 (s); **HRMS (ESI)** calcd for C<sub>22</sub>H<sub>26</sub>F<sub>2</sub>NO<sub>2</sub><sup>+</sup> [*M*+*H*]<sup>+</sup> 374.1926; Found 374.1930.

**6,6-Difluoro-*N*-(4-methoxy-2,6-dimethylphenyl)-1-(thiophen-3-yl)bicyclo[3.1.0]hexan-2-amine (45)**

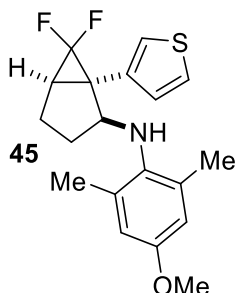

Following the general procedure E, starting from 3-(3,3-difluorocycloprop-1-en-1-yl)thiophene (**89**) (47 mg, 0.30 mmol, 1.0 equiv.), the title compound **45** (95:5 *dr* in the crude  $^{19}\text{F}$  NMR) was obtained after purification by column chromatography on Biotage (SNAP cartridge KP-SIL 25 g, Pentane:Et<sub>2</sub>O 98:2 to 95:5) as a pale yellow oil and as a mixture of diastereoisomers (43 mg, 0.12 mmol, 41 % yield). *R<sub>f</sub>* 0.52 (Pentane:Et<sub>2</sub>O 90:10);  $^1\text{H}$  NMR (400 MHz, Chloroform-*d*)  $\delta$  7.18 (dd, *J* = 5.0, 3.0 Hz, 1H, HetAr*H*), 7.10 (dd, *J* = 3.1, 1.3 Hz, 1H, HetAr*H*), 6.96 (dt, *J* = 5.2, 1.2 Hz, 1H, HetAr*H*), 6.48 (s, 2H, Ar*H*), 4.33 (dt, *J* = 9.6, 6.7 Hz, 1H, CHNH), 3.72 (s, 3H, OCH<sub>3</sub>), 3.27 (bs, 1H, NH), 2.22 – 2.04 (m, 10H, NHCHCH<sub>2</sub>, CF<sub>2</sub>CHCH<sub>2</sub> & CF<sub>2</sub>CH), 1.69 – 1.59 (m, 1H, NHCHCH<sub>2</sub>);  $^{13}\text{C}$  NMR (101 MHz, Chloroform-*d*)  $\delta$  154.5, 138.2, 135.9, 130.6, 127.8, 125.1, 123.1, 117.2 (hidden dd, one peak was not found due to overlapping), 114.2, 66.4, 55.5, 41.5 (dd, *J* = 12.3, 8.0 Hz), 35.5 (dd, *J* = 12.2, 9.0 Hz), 31.4 (d, *J* = 8.0 Hz), 23.9, 19.0;  $^{19}\text{F}$  NMR (376 MHz, Chloroform-*d*)  $\delta$  -124.4 (dd, *J* = 160.6, 15.5 Hz, Major diastereoisomer), -125.6 (ddd, *J* = 157.4, 13.5, 5.0 Hz, Minor diastereoisomer), -138.1 (d, *J* = 161.4 Hz, Major diastereoisomer), -141.8 (d, *J* = 157.0 Hz, Minor diastereoisomer); IR  $\tilde{\nu}_{\text{max}}$  3385 (w), 3105 (w), 2947 (m), 2842 (w), 1603 (m), 1486 (s), 1376 (w), 1319 (m), 1225 (s), 1191 (m), 1151 (s), 1101 (m), 1065 (s), 1031 (w), 987 (m), 911 (m), 853 (m), 781 (m), 733 (m), 687 (w), 646 (w); HRMS (ESI) calcd for C<sub>19</sub>H<sub>22</sub>F<sub>2</sub>NOS<sup>+</sup> [M+H]<sup>+</sup> 350.1385; found 350.1388.

**6,6-Difluoro-*N*-(4-methoxy-2,6-dimethylphenyl)-1-(naphthalen-2-yl)bicyclo[3.1.0]hexan-2-amine (46)**

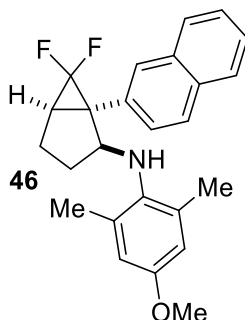

Following the general procedure E, starting from 2-(3,3-difluorocycloprop-1-en-1-yl)naphthalene (**90**) (61 mg, 0.30 mmol, 1.0 equiv.), the title compound **46** (93:7 *dr* in the crude  $^{19}\text{F}$  NMR) was obtained after purification by column chromatography on Biotage (SNAP cartridge KP-SIL 25 g, Pentane:Et<sub>2</sub>O 95:5 to 90:10) as a pale yellow oil and as a single diastereoisomer (81 mg, 0.21

mmol, 69 % yield). **R<sub>f</sub>** 0.32 (Pentane:Et<sub>2</sub>O 90:10); **<sup>1</sup>H NMR (400 MHz, Chloroform-*d*)** δ 7.82 – 7.76 (m, 1H, Ar*H*), 7.76 – 7.71 (m, 3H, Ar*H*), 7.49 – 7.40 (m, 3H, Ar*H*), 6.37 (s, 2H, Ar*H*), 4.35 (dd, *J* = 16.5, 7.9 Hz, 1H, CHNH), 3.60 (s, 3H, OMe), 3.35 (bs, 1H, NH), 2.34 – 2.25 (m, 2H, CF<sub>2</sub>CHCH<sub>2</sub>), 2.18 (m, 2H, CF<sub>2</sub>CH & NHCHCH<sub>2</sub>), 2.05 (s, 6H, CH<sub>3</sub>), 1.76 – 1.64 (m, 1H, NHCHCH<sub>2</sub>); **<sup>13</sup>C NMR (101 MHz, Chloroform-*d*)**<sup>24</sup> δ 154.4, 138.1, 133.2, 133.0, 132.6, 130.5, 128.4, 128.0, 127.8, 127.7, 126.0, 125.9, 117.2 (dd, *J* = 302.7, 282.4 Hz), 114.1, 67.6, 55.4, 45.4 (dd, *J* = 11.9, 8.0 Hz), 34.7 (dd, *J* = 12.6, 9.0 Hz), 31.7 (d, *J* = 7.6 Hz), 24.3, 19.0; **<sup>19</sup>F NMR (376 MHz, Chloroform-*d*)** δ -123.0 (dd, *J* = 161.3, 15.8 Hz), -137.3 (d, *J* = 160.5 Hz); **IR**  $\tilde{\nu}_{\text{max}}$  3373 (w), 3053 (w), 1610 (m), 1486 (s), 1443 (m), 1317 (m), 1231 (m), 1194 (m), 1151 (m), 1066 (s), 1025 (w), 988 (m), 908 (s), 861 (m), 820 (m), 731 (s), 649 (w); **HRMS (ESI)** calcd for C<sub>25</sub>H<sub>26</sub>F<sub>2</sub>NO<sup>+</sup> [M+H]<sup>+</sup> 394.1977; found 394.1969.

## 7. Gram-scale Synthesis of **9** and Product Modifications

### Procedure for the gram scale 3+2 cycloaddition

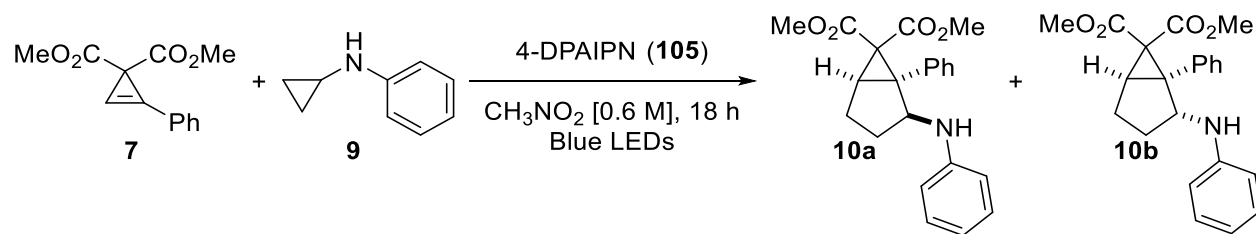

A 10 mL test tube was charged with 2,4,5,6-tetrakis(diphenylamino)isophthalonitrile (4-DPAIPN, **105**) (69 mg, 0.086 mmol, 0.02 equiv.), dimethyl 2-phenylcycloprop-2-ene-1,1-dicarboxylate (**7**) (1.00 g, 4.31 mmol, 1 equiv.) and *N*-cyclopropylaniline (**9**) (1.03 g, 7.75 mmol, 1.8 equiv.). The tube was sealed, evacuated and back-filled with nitrogen (3 times). Then 7.2 mL of degassed nitromethane (3 freeze pump thaw cycles) was added via syringe and the resulting mixture was irradiated at room temperature for 18 hours with Blue LEDs, positioned at 4 to 5 cm of the reaction vessel. The reaction mixture was then filtered through a small pad of silica gel eluting with Et<sub>2</sub>O, and the filtrate was concentrated under reduced pressure. The desired product (55:45 *dr* in the crude <sup>1</sup>H NMR) was obtained as a separable mixture of two diastereoisomers after purification by column chromatography (SiO<sub>2</sub>, Pentane:Et<sub>2</sub>O 95:5 to 90:10) affording **10a** (755 mg, 2.07 mmol, 48 % yield) and **10b** (677 mg, 1.85 mmol, 43 % yield).

### 1-(3-Chlorophenyl)-6,6-Difluorobicyclo[3.1.0]hexan-2-amine (**47**)

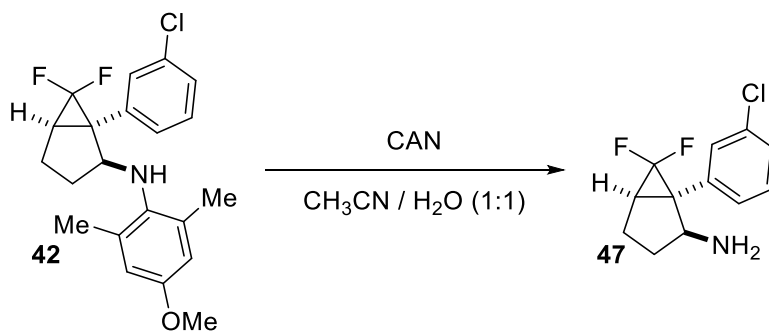

To a solution of **42** (92:8 *dr*, 94 mg, 0.25 mmol, 1.0 equiv.) in CH<sub>3</sub>CN (5 mL) was added dropwise at room temperature, a solution of CAN (546 mg, 0.995 mmol, 4.0 equiv.) in H<sub>2</sub>O (5 mL). After 30 mins, TLC monitoring (pentane:Et<sub>2</sub>O 9:1) indicated full conversion of the starting material. The reaction mixture was quenched with 1 M aq. NaOH until pH = 11 was reached, followed by extraction with EtOAc (3 x 15 mL). The combined organic layers were dried over MgSO<sub>4</sub>, filtered, and concentrated under reduced pressure. The crude residue was purified by column chromatography (SiO<sub>2</sub>, DCM:MeOH 98:2 to 95:5) affording the title compound **47** (0.041 g, 0.168 mmol, 68 % yield) as a colorless oil and as a 93:7 mixture of diastereoisomers (based on <sup>19</sup>F NMR integrations). *R<sub>f</sub>* 0.55 (DCM:MeOH 95:5); <sup>1</sup>H NMR (400 MHz, Chloroform-*d*) δ 7.35 – 7.32 (m, 1H, ArH), 7.32 – 7.27 (m, 2H, ArH), 7.25 – 7.22 (m, 1H, ArH), 3.77 (dt, *J* = 9.8, 7.3 Hz, 1H, CHNH<sub>2</sub>), 2.31 – 2.17 (m, 3H, CF<sub>2</sub>CHCH<sub>2</sub> & NH<sub>2</sub>CHCH<sub>2</sub>), 2.09 (dd, *J* = 14.6, 4.8 Hz, 1H, CF<sub>2</sub>CH), 1.67 (bs, 2H, NH<sub>2</sub>), 1.63 – 1.52 (m, 1H, NH<sub>2</sub>CHCH<sub>2</sub>); <sup>13</sup>C NMR

(101 MHz, Chloroform-*d*)  $\delta$  137.7, 134.6, 130.1, 129.2 (d,  $J = 2.6$  Hz), 128.0, 127.4, 116.4 (dd,  $J = 303.4, 280.1$  Hz), 63.3, 46.2 (dd,  $J = 11.8, 7.4$  Hz), 34.9 (dd,  $J = 12.6, 9.2$  Hz), 32.8 (d,  $J = 8.2$  Hz), 24.4;  $^{19}\text{F}$  NMR (376 MHz, Chloroform-*d*)  $\delta$  -122.9 (dd,  $J = 161.9, 14.8$ , Major diastereoisomer), -125.1 (d,  $J = 162.0$ , Minor diastereoisomer), -140.4 (d,  $J = 161.9$ , Major diastereoisomer), -141.4 (d,  $J = 159.3$ , Minor diastereoisomer); IR  $\tilde{\nu}_{\text{max}}$  3381 (w), 3060 (w), 3033 (w), 2956 (m), 2882 (w), 1717 (w), 1598 (m), 1572 (m), 1477 (m), 1446 (m), 1303 (w), 1255 (m), 1203 (s), 1072 (m), 1023 (w), 987 (s), 946 (w), 915 (w), 874 (w), 783 (s), 733 (m), 697 (s), 603 (w); HRMS (ESI) calcd for  $\text{C}_{12}\text{H}_{13}\text{ClF}_2\text{N}^+ [\text{M}+\text{H}]^+$  244.0699; found 244.0699.

**Tert-butyl (-1-(3-chlorophenyl)-6,6-difluorobicyclo[3.1.0]hexan-2-yl)carbamate (48)**

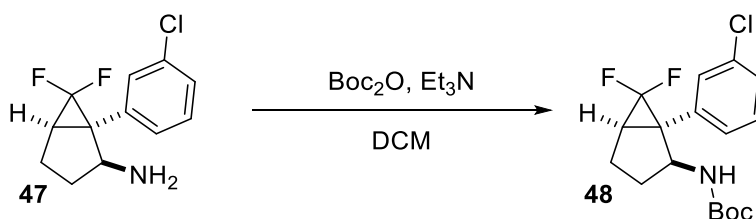

To a solution of **47** (93:7 dr, 21 mg, 0.086 mmol, 1.0 equiv.) in DCM (0.4 mL) was added  $\text{Boc}_2\text{O}$  (26 mg, 0.12 mmol, 1.4 equiv.) and trimethylamine (32  $\mu\text{L}$ , 0.23 mmol, 2.7 equiv.), and the resulting mixture was left stirring overnight at room temperature. The solution was then washed with aqueous citric acid (0.1 M, 1.5 mL). The aqueous layer was extracted with DCM (3 x 5 mL), and the combined organic layers were washed with aqueous  $\text{NaHCO}_3$  (saturated solution, 5 mL) and brine, dried over  $\text{MgSO}_4$ , filtered and concentrated under reduced pressure. The crude residue was purified by preparative TLC (Pentane:EtOAc 85:15) affording compound **48** (22 mg, 0.064 mmol, 74 % yield) as a colorless oil and as a 95:5 mixture of diastereoisomers (based on  $^{19}\text{F}$  NMR integrations).  $R_f$  0.45 (Pentane:EtOAc 80:20);  $^1\text{H}$  NMR (400 MHz, Acetonitrile-*d*<sub>3</sub>)  $\delta$  7.40 – 7.27 (m, 4H, ArH), 5.44 (d,  $J = 9.0$ , 1H, NH), 4.61 (qd,  $J = 9.6, 6.6$ , 1H, NHCH), 2.39 – 2.24 (m, 2H, NHCHCH<sub>2</sub>), 2.19 – 2.14 (m, 2H, NHCHCH<sub>2</sub>CH<sub>2</sub> & CF<sub>2</sub>CH), 1.56 – 1.46 (m, 1H, NHCHCH<sub>2</sub>CH<sub>2</sub>), 1.35 (s, 9H, Boc);  $^{13}\text{C}$  NMR (101 MHz, Acetonitrile-*d*<sub>3</sub>)  $\delta$  156.3, 138.3, 134.6, 131.0, 130.0, 128.6, 128.5, 117.3 (dd,  $J = 303.6, 277.9$  Hz), 79.6, 60.6, 45.2 – 44.7 (m), 34.3 (t,  $J = 10.8$  Hz), 30.6 (d,  $J = 8.5$  Hz), 28.5, 24.4;  $^{19}\text{F}$  NMR (376 MHz, Acetonitrile-*d*<sub>3</sub>)  $\delta$  -124.4 (d,  $J = 161.2$ , Minor diastereoisomer), -125.3 (dd,  $J = 160.8, 15.5$ , Major diastereoisomer), -139.9 (d,  $J = 163.0$ , Major diastereoisomer), -142.6 (d,  $J = 159.0$ , Minor diastereoisomer); IR  $\tilde{\nu}_{\text{max}}$  3443 (m), 3339 (m), 2976 (m), 1704 (s), 1567 (w), 1496 (s), 1448 (m), 1369 (m), 1286 (m), 1241 (m), 1167 (s), 1052 (m), 986 (m), 948 (w), 871 (w), 781 (m), 693 (m); HRMS (ESI) calcd for  $\text{C}_{17}\text{H}_{20}\text{ClF}_2\text{NNaO}_2^+ [\text{M}+\text{Na}]^+$  366.1043; found 366.1048.

**1-(3-Chlorophenyl)-6,6-difluoro-N-neopentylbicyclo[3.1.0]hexan-2-amine (49)**



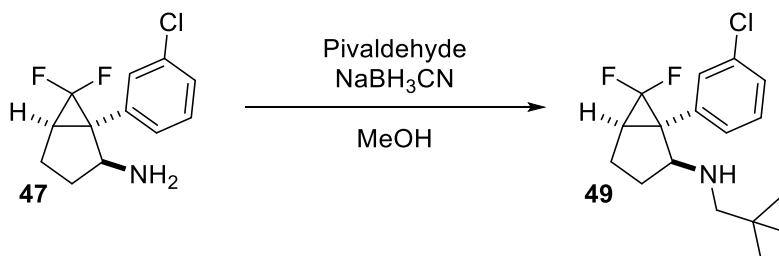

To a solution of **47** (93:7 dr, 21 mg, 0.086 mmol, 1.0 equiv.) in MeOH (0.8 mL) was added NaBH<sub>3</sub>CN (8.1 mg, 0.13 mmol, 1.5 equiv.) and pivaldehyde (19  $\mu$ L, 0.17 mmol, 2.0 equiv.) and the resulting mixture was left stirring overnight at room temperature. The solution was then acidified using aqueous hydrochloric acid (0.1 M, 2.0 mL), followed by extracting with Et<sub>2</sub>O (2 x 5 mL). The aqueous layer was then basified with aqueous sodium hydroxide (0.1 M, 4.5 mL), and extracted with DCM (3 x 5 mL). The DCM fractions were dried over MgSO<sub>4</sub>, filtered and concentrated under reduced pressure. The crude residue was purified by preparative TLC (Pentane:EtOAc 98:2) affording compound **49** (13 mg, 0.041 mmol, 48 % yield) as a pale yellow oil and as a 92:8 mixture of diastereoisomers (based on <sup>19</sup>F NMR integrations). *R<sub>f</sub>* 0.58 (Pentane:EtOAc 98:2); <sup>1</sup>H NMR (400 MHz, Chloroform-*d*)  $\delta$  7.47 (m, 1H, ArH), 7.27 – 7.21 (m, 1H, ArH), 7.19 – 7.16 (m, 2H, ArH), 3.52 (dt, *J* = 10.3, 7.0 Hz, 1H, NHCH), 2.36 (dd, *J* = 11.4, 0.7 Hz, 1H, NHCH<sub>2</sub>), 2.19 – 1.99 (m, 5H, NHCH<sub>2</sub> & NHCHCH<sub>2</sub> & NHCHCH<sub>2</sub>CH<sub>2</sub> & CF<sub>2</sub>CH), 1.41 – 1.36 (m, 1H, NHCHCH<sub>2</sub>CH<sub>2</sub>), 0.79 (s, 9H, (CH<sub>3</sub>)<sub>3</sub>); <sup>13</sup>C NMR (101 MHz, Chloroform-*d*)  $\delta$  138.4, 134.1, 129.4, 129.3 (d, *J* = 2.3 Hz), 127.4, 127.1, 116.6 (dd, *J* = 305.4, 279.8 Hz), 69.3, 60.9, 44.6 (dd, *J* = 12.4, 8.1 Hz), 33.2 (dd, *J* = 12.5, 9.1 Hz), 31.8, 31.1 (d, *J* = 7.1 Hz), 27.7, 24.2. <sup>19</sup>F NMR (376 MHz, Chloroform-*d*)  $\delta$  -124.6 (dd, *J* = 159.2, 14.9 Hz, Major diastereoisomer), -125.1 (dd, *J* = 157.6, 16.8 Hz, Minor diastereoisomer), -137.2 (d, *J* = 159.8 Hz, Major diastereoisomer), -141.3 (d, *J* = 158.3 Hz, Minor diastereoisomer); IR  $\tilde{\nu}_{\text{max}}$  2953 (s), 2874 (m), 1736 (w), 1598 (m), 1572 (m), 1473 (s), 1364 (m), 1296 (m), 1251 (m), 1201 (s), 1144 (s), 1091 (m), 1067 (m), 988 (m), 912 (m), 830 (w), 786 (m), 735 (s), 694 (s); HRMS (ESI) calcd for C<sub>17</sub>H<sub>23</sub>ClF<sub>2</sub>N<sup>+</sup> [M+H]<sup>+</sup> 314.1482; found 314.1488.

**Methyl 3-oxo-2a<sup>1</sup>,4-diphenylhexahydro-4-azacyclopropa[*cd*]pentalene-2b(1*H*)-carboxylate (50)**

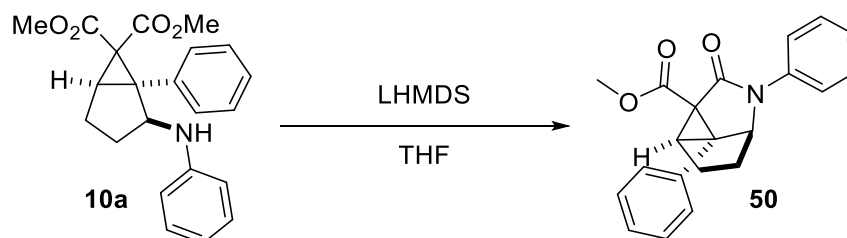

To a stirred solution of compound **10a** (73 mg, 0.20 mmol, 1 equiv.) in THF (3.0 mL) was added dropwise LHMDS (1.0 M solution in THF, 0.22 mL, 0.22 mmol, 1.1 equiv.). After 20 min stirring at room temperature, TLC monitoring indicated full conversion of the starting material. The reaction mixture was therefore quenched by filtration over a small pad of silica gel eluting with EtOAc, and the filtrate was evaporated under reduced pressure. The crude residue was purified by column chromatography (SiO<sub>2</sub> previously deactivated with Et<sub>3</sub>N, Pentane:Et<sub>2</sub>O 60:40)

affording the title compound **50** (0.058 g, 0.17 mmol, 87 % yield) as a pale yellow oil. **R<sub>f</sub>** 0.25 (Pentane:Et<sub>2</sub>O 50:50); **<sup>1</sup>H NMR (400 MHz, Chloroform-*d*)**  $\delta$  7.66 – 7.59 (m, 2H, ArH), 7.41 – 7.29 (m, 7H, ArH), 7.18 (t, *J* = 7.4 Hz, 1H, ArH), 4.74 (d, *J* = 3.1 Hz, 1H, CHN), 3.56 (s, 3H, OCH<sub>3</sub>), 3.30 (dd, *J* = 6.7, 1.5 Hz, 1H, CHCH<sub>2</sub>), 2.47 – 2.34 (m, 1H, NCHCH<sub>2</sub>), 2.14 – 1.99 (m, 2H, NCHCH<sub>2</sub>CH<sub>2</sub>), 1.97 – 1.86 (m, 1H, NCHCH<sub>2</sub>); **<sup>13</sup>C NMR (101 MHz, Chloroform-*d*)**  $\delta$  167.0, 165.9, 138.0, 134.2, 129.3, 128.8, 128.7, 128.5, 125.4, 121.8, 69.3, 55.7, 52.6, 49.4, 38.0, 37.1, 23.9; **IR**  $\tilde{\nu}_{\text{max}}$  3057 (w), 2956 (w), 2871 (w), 1734 (s), 1694 (s), 1597 (w), 1496 (s), 1254 (s), 1219 (w), 1175 (w), 1138 (w), 1086 (m), 973 (w), 913 (m), 828 (w), 730 (s), 696 (m), 645 (w); **HRMS (ESI)** calcd for C<sub>21</sub>H<sub>20</sub>NO<sub>3</sub><sup>+</sup> [M+H]<sup>+</sup> 334.1438; found 334.1442.

#### Dimethyl 2-(1,6-diphenyl-6-azabicyclo[3.1.0]hexan-2-yl)malonate (**51**)

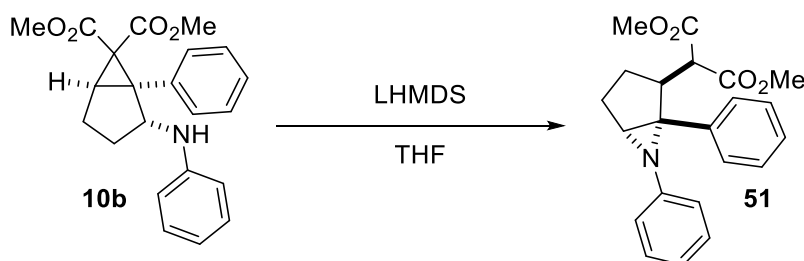

To a stirred solution of compound **10b** (73 mg, 0.20 mmol, 1 equiv.) in THF (3.0 mL) was added dropwise LHMDS (1.0 M solution in THF, 0.22 mL, 0.22 mmol, 1.1 equiv.). After 20 min stirring at room temperature, TLC monitoring indicated full conversion of the starting material. The reaction mixture was therefore quenched by filtration over a small pad of silica gel eluting with EtOAc, and the filtrate was evaporated under reduced pressure to afford the pure title compound **51** without further purification (0.069 g, 0.19 mmol, 95 % yield) as a pale yellow oil. NMR experiments were performed in CDCl<sub>3</sub> that was previously eluted through basic alumina, due to the observed acid sensitivity of **51**. **R<sub>f</sub>** 0.45 (Pentane:Et<sub>2</sub>O 70:30); **<sup>1</sup>H NMR (400 MHz, Chloroform-*d*)**  $\delta$  7.31 – 7.24 (m, 4H, ArH), 7.22 – 7.17 (m, 1H, ArH), 7.12 (t, *J* = 7.7 Hz, 2H, ArH), 6.87 – 6.81 (m, 3H, ArH), 3.61 (s, 3H, OCH<sub>3</sub>), 3.53 (s, 3H, OCH<sub>3</sub>), 3.51 (d, *J* = 5.9 Hz, 1H, CHCHCOOCH<sub>3</sub>), 3.49 (d, *J* = 2.4 Hz, 1H, CHCOOCH<sub>3</sub>), 3.38 (ddd, *J* = 8.9, 5.6, 1.4 Hz, 1H, NCH), 2.18 – 2.06 (m, 2H, NCHCH<sub>2</sub>CH<sub>2</sub>), 1.74 (ddt, *J* = 14.4, 8.4, 1.7 Hz, 1H, NCHCH<sub>2</sub>CH<sub>2</sub>), 1.50 – 1.39 (m, 1H, NCHCH<sub>2</sub>CH<sub>2</sub>); **<sup>13</sup>C NMR (101 MHz, Chloroform-*d*)**  $\delta$  169.3, 168.9, 148.1, 134.9, 130.1, 128.8, 128.3, 127.9, 121.5, 119.9, 59.9, 53.6, 52.5, 52.2, 48.5, 41.6, 26.3, 25.6; **IR**  $\tilde{\nu}_{\text{max}}$  3026 (w), 2950 (m), 2858 (w), 1739 (s), 1597 (m), 1491 (m), 1442 (m), 1388 (w), 1367 (w), 1254 (s), 1199 (m), 1161 (m), 1029 (w), 930 (w), 766 (m), 698 (m); **HRMS (ESI)** calcd for C<sub>22</sub>H<sub>24</sub>NO<sub>4</sub><sup>+</sup> [M+H]<sup>+</sup> 366.1700; found 366.1694.

#### 3-ydroxy-2,2-dimethylpropyl 2-(p-tolyl)cyclopent-2-ene-1-carboxylate (**52**)

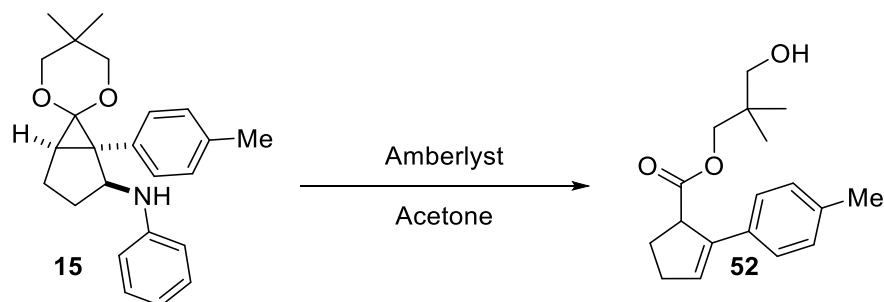

To a stirred solution of **15** (49.0 mg, 0.135 mmol, 1 equiv.) in acetone (4 mL) was added Amberlyst 15 (100 mg). The resulting suspension was stirred at room temperature for 24 h, and then filtered through celite. The filtrate was evaporated under reduced pressure. The crude residue was purified by preparative TLC (Pentane:EtOAc 80:20) affording the title compound **52** (29 mg, 0.099 mmol, 73 % yield) as a white solid. **R<sub>f</sub>** 0.35 (Pentane:EtOAc 80:20); **m.p** = 49-50 °C; **<sup>1</sup>H NMR (400 MHz, Chloroform-*d*)** δ 7.32 (d, *J* = 8.1 Hz, 2H, Ar*H*), 7.11 (d, *J* = 7.9 Hz, 2H, Ar*H*), 6.28 (td, *J* = 2.7, 1.6 Hz, 1H, C=CH), 4.00 (dddt, *J* = 9.4, 4.2, 2.8, 1.4 Hz, 1H, CHCO), 3.85 (q, *J* = 11.0 Hz, 2H, COOCH<sub>2</sub>), 3.06 (s, 2H, CH<sub>2</sub>OH), 2.77 – 2.64 (m, 1H, C=CHCH<sub>2</sub>CH<sub>2</sub>), 2.62 – 2.50 (m, 1H, C=CHCH<sub>2</sub>CH<sub>2</sub>), 2.41 – 2.33 (m, 1H, C=CHCH<sub>2</sub>CH<sub>2</sub>), 2.32 (s, 3H, C<sub>Ar</sub>CH<sub>3</sub>), 2.30 – 2.21 (m, 1H, C=CHCH<sub>2</sub>CH<sub>2</sub>), 0.78 (s, 6H, (CH<sub>3</sub>)<sub>2</sub>); **<sup>13</sup>C NMR (101 MHz, Chloroform-*d*)** δ 176.1, 141.0, 137.4, 132.7, 129.3, 129.3, 125.9, 69.8, 68.2, 51.5, 36.5, 32.7, 29.5, 21.5, 21.3; **IR**  $\tilde{\nu}_{\text{max}}$  3485 (m), 2958 (s), 1725 (s), 1617 (w), 1513 (w), 1468 (m), 1375 (m), 1331 (m), 1268 (m), 1170 (s), 1044 (s), 962 (w), 810 (m), 740 (w); **HRMS (ESI)** calcd for C<sub>18</sub>H<sub>24</sub>NaO<sub>3</sub><sup>+</sup> [M+Na]<sup>+</sup> 311.1618; found 311.1621.

## 8. Crystal Structure of 16b

### Dimethyl 1-(4-(*tert*-butyl)phenyl)-2-(phenylamino)bicyclo[3.1.0]hexane-6,6-dicarboxylate (16b)

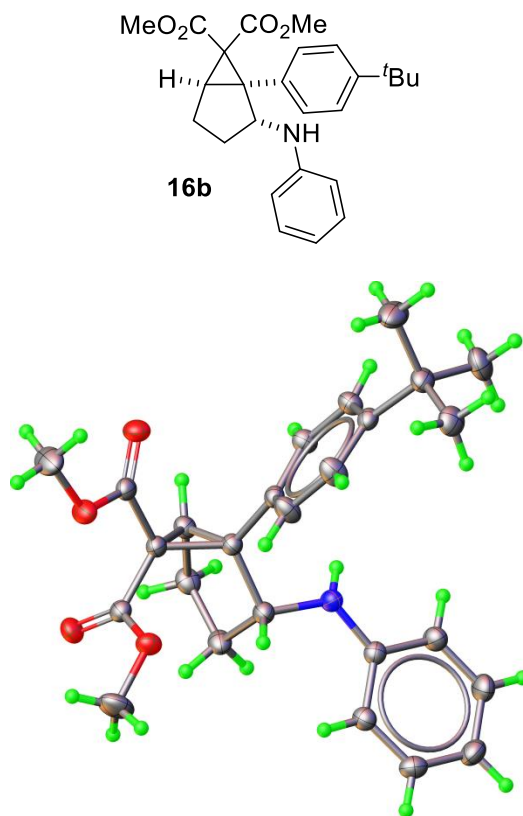

**Experimental.** Single clear colourless plate-shaped crystals of **16b** were obtained by recrystallisation from DCM/Pentane at room temperature. A suitable crystal of 0.29×0.11×0.06 mm<sup>3</sup> was selected and mounted on a suitable support on a SuperNova, Dual, Cu at home/near, Atlas diffractometer. The crystal was kept at a steady  $T = 140.00(10)$  K during data collection. The structure was solved with the **ShelXT** (Sheldrick, 2015) structure solution program using the dual solution method and by using **Olex2** (Dolomanov et al., 2009) as the graphical interface. The model was refined with version 2018/3 of **ShelXL** (Sheldrick, 2015) using full matrix least squares on  $|F|^2$  minimisation.

**Crystal Data.** C<sub>26</sub>H<sub>31</sub>NO<sub>4</sub>,  $M_r = 421.52$ , orthorhombic, *Pbca* (No. 61),  $a = 16.11470(19) \text{ \AA}$ ,  $b = 12.70487(14) \text{ \AA}$ ,  $c = 22.6264(2) \text{ \AA}$ ,  $\alpha = \beta = \gamma = 90^\circ$ ,  $V = 4632.42(9) \text{ \AA}^3$ ,  $T = 140.00(10) \text{ K}$ ,  $Z = 8$ ,  $Z' = 1$ ,  $\mu(\text{CuK}\alpha) = 0.647$ , 33970 reflections measured, 4653 unique ( $R_{\text{int}} = 0.0368$ ) which were used in all calculations. The final  $wR_2$  was 0.0953 (all data) and  $R_1$  was 0.0350 ( $I > 2(I)$ ).

| Compound                              | bm3-459-pb (16b)                                |
|---------------------------------------|-------------------------------------------------|
| Formula                               | C <sub>26</sub> H <sub>31</sub> NO <sub>4</sub> |
| $D_{\text{calc.}} / \text{g cm}^{-3}$ | 1.209                                           |
| $\mu / \text{mm}^{-1}$                | 0.647                                           |
| Formula Weight                        | 421.52                                          |
| Colour                                | clear colourless                                |
| Shape                                 | plate                                           |
| Size/mm <sup>3</sup>                  | 0.29×0.11×0.06                                  |
| $T/\text{K}$                          | 140.00(10)                                      |
| Crystal System                        | orthorhombic                                    |
| Space Group                           | <i>Pbca</i>                                     |
| $a/\text{\AA}$                        | 16.11470(19)                                    |
| $b/\text{\AA}$                        | 12.70487(14)                                    |
| $c/\text{\AA}$                        | 22.6264(2)                                      |
| $\alpha/^\circ$                       | 90                                              |
| $\beta/^\circ$                        | 90                                              |
| $\gamma/^\circ$                       | 90                                              |
| $V/\text{\AA}^3$                      | 4632.42(9)                                      |
| $Z$                                   | 8                                               |
| $Z'$                                  | 1                                               |
| Wavelength/ $\text{\AA}$              | 1.54184                                         |
| Radiation type                        | CuK $\alpha$                                    |
| $\Theta_{\text{min}}/^\circ$          | 3.907                                           |
| $\Theta_{\text{max}}/^\circ$          | 73.601                                          |
| Measured Refl.                        | 33970                                           |
| Independent Refl.                     | 4653                                            |
| Reflections with $I > 2(I)$           | 3975                                            |
| $R_{\text{int}}$                      | 0.0368                                          |
| Parameters                            | 290                                             |
| Restraints                            | 0                                               |
| Largest Peak/ $\text{e \AA}^{-3}$     | 0.352                                           |
| Deepest Hole/ $\text{e \AA}^{-3}$     | -0.169                                          |
| GooF                                  | 1.022                                           |
| $wR_2$ (all data)                     | 0.0953                                          |
| $wR_2$                                | 0.0891                                          |
| $R_1$ (all data)                      | 0.0425                                          |
| $R_1$                                 | 0.0350                                          |

A clear colourless plate-shaped crystal with dimensions of 0.29×0.11×0.06 mm<sup>3</sup> was mounted on a suitable support. Data were collected using a SuperNova, Dual, Cu at home/near, Atlas diffractometer operating at  $T = 140.00(10) \text{ K}$ .

Data were measured using  $\omega$  scans using  $\text{CuK}\alpha$  radiation. The total number of runs and images was based on the strategy calculation from the program **CrysAlisPro** (Rigaku, V1.171.40.20a, 2018) The maximum resolution achieved was  $\Theta = 73.601^\circ$  (0.80 Å).

The diffraction pattern was indexed. The total number of runs and images was based on the strategy calculation from the program **CrysAlisPro** (Rigaku, V1.171.40.20a, 2018) and the unit cell was refined using **CrysAlisPro** (Rigaku, V1.171.40.20a, 2018) on 10757 reflections, 32% of the observed reflections.

Data reduction, scaling and absorption corrections were performed using **CrysAlisPro** (Rigaku, V1.171.40.20a, 2018). The final completeness is 100.00 % out to  $73.601^\circ$  in  $\Theta$ . A Gaussian absorption correction was performed using CrysAlisPro 1.171.40.20a (Rigaku Oxford Diffraction, 2018). Numerical absorption correction based on Gaussian integration over a multifaceted crystal model. Empirical absorption correction using spherical harmonics as implemented in SCALE3 ABSPACK scaling algorithm. The absorption coefficient  $\mu$  of this material is  $0.647 \text{ mm}^{-1}$  at this wavelength ( $\lambda = 1.542\text{\AA}$ ) and the minimum and maximum transmissions are 0.687 and 1.000.

The structure was solved and the space group *Pbca* (# 61) determined by the **ShelXT** (Sheldrick, 2015) structure solution program using dual and refined by full matrix least squares on  $|F|^2$  using version 2018/3 of **ShelXL** (Sheldrick, 2015). All non-hydrogen atoms were refined anisotropically. Hydrogen atom positions were calculated geometrically and refined using the riding model where each H-atom was assigned a fixed isotropic displacement parameter with a value equal to 1.2  $U_{eq}$  of its parent C-atom (1.5  $U_{eq}$  for the methyl groups), but hydrogen on nitrogen atom (N1) was found in a difference map and refined freely.

There is a single molecule in the asymmetric unit, which is represented by the reported sum formula. In other words: Z is 8 and Z' is 1.

**Table 3:** Fractional Atomic Coordinates ( $\times 10^4$ ) and Equivalent Isotropic Displacement Parameters ( $\text{\AA}^2 \times 10^3$ ) for **16b**.  $U_{eq}$  is defined as 1/3 of the trace of the orthogonalised  $U_{ij}$ .

| Atom | x         | y          | z         | $U_{eq}$  |
|------|-----------|------------|-----------|-----------|
| O1   | 4552.8(6) | 5092.8(7)  | 4125.0(4) | 30.0(2)   |
| O2   | 5377.9(6) | 3665.4(7)  | 4127.5(4) | 29.3(2)   |
| O3   | 5393.3(6) | 2921.6(7)  | 2813.8(4) | 29.1(2)   |
| O4   | 6560.3(5) | 3705.7(7)  | 3125.0(4) | 26.52(19) |
| N1   | 6243.3(6) | 6845.1(8)  | 2311.9(4) | 23.8(2)   |
| C1   | 6157.0(7) | 5757.2(9)  | 2499.5(5) | 23.2(2)   |
| C2   | 5611.1(7) | 5741.8(9)  | 3061.0(5) | 20.9(2)   |
| C3   | 4772.6(7) | 5337.2(9)  | 2877.8(5) | 22.9(2)   |
| C4   | 4765.4(8) | 5139.6(10) | 2218.2(5) | 28.0(3)   |
| C5   | 5686.3(8) | 5079.7(10) | 2039.1(5) | 27.7(3)   |
| C6   | 5786.2(7) | 6567.6(9)  | 3514.8(5) | 20.6(2)   |
| C7   | 6504.2(8) | 6499.7(10) | 3849.2(6) | 29.6(3)   |
| C8   | 6748.5(8) | 7318.2(10) | 4217.5(6) | 32.0(3)   |
| C9   | 6280.8(7) | 8233.4(9)  | 4270.2(5) | 22.4(2)   |
| C10  | 5530.2(8) | 8256.0(9)  | 3965.3(5) | 25.5(2)   |
| C11  | 5285.9(7) | 7445.5(10) | 3591.6(5) | 25.0(2)   |

| Atom | x          | y           | z         | $U_{eq}$ |
|------|------------|-------------|-----------|----------|
| C12  | 6572.9(8)  | 9176.3(10)  | 4640.5(5) | 28.4(3)  |
| C13  | 6142.5(10) | 9149.7(13)  | 5243.1(6) | 43.4(4)  |
| C14  | 6360.4(10) | 10211.4(11) | 4322.6(7) | 39.6(3)  |
| C15  | 7515.8(9)  | 9154.2(11)  | 4733.5(6) | 34.2(3)  |
| C16  | 5326.6(7)  | 4641.1(9)   | 3256.0(5) | 21.0(2)  |
| C17  | 5038.3(7)  | 4519.7(9)   | 3882.9(5) | 22.4(2)  |
| C18  | 5112.7(11) | 3425.2(12)  | 4723.2(6) | 42.2(4)  |
| C19  | 5744.0(7)  | 3662.4(9)   | 3033.9(5) | 21.9(2)  |
| C20  | 7012.1(10) | 2778.9(12)  | 2944.5(8) | 46.0(4)  |
| C21  | 6773.9(7)  | 7125.4(9)   | 1857.8(5) | 22.3(2)  |
| C22  | 6709.9(8)  | 8144.9(9)   | 1619.5(6) | 27.5(3)  |
| C23  | 7268.0(9)  | 8498.5(10)  | 1201.4(6) | 32.6(3)  |
| C24  | 7911.5(8)  | 7855.6(11)  | 1007.4(6) | 32.7(3)  |
| C25  | 7969.3(8)  | 6841.5(10)  | 1229.5(5) | 28.8(3)  |
| C26  | 7405.2(7)  | 6469.3(9)   | 1644.1(5) | 24.8(2)  |

**Table 4:** Anisotropic Displacement Parameters ( $\times 10^4$ ) **16b**. The anisotropic displacement factor exponent takes the form:  $-2\pi^2[h^2a^{*2} \times U_{11} + \dots + 2hka^* \times b^* \times U_{12}]$

| Atom | $U_{11}$ | $U_{22}$ | $U_{33}$ | $U_{23}$ | $U_{13}$ | $U_{12}$ |
|------|----------|----------|----------|----------|----------|----------|
| O1   | 32.2(5)  | 31.3(5)  | 26.3(4)  | -3.2(3)  | 5.8(4)   | 2.8(4)   |
| O2   | 39.8(5)  | 26.0(4)  | 22.1(4)  | 3.4(3)   | 4.9(4)   | 2.3(4)   |
| O3   | 33.6(5)  | 22.8(4)  | 30.9(4)  | -5.4(3)  | 0.8(4)   | -3.8(3)  |
| O4   | 23.3(4)  | 27.8(4)  | 28.4(4)  | -2.2(3)  | 1.4(3)   | 3.6(3)   |
| N1   | 24.9(5)  | 21.6(5)  | 24.8(5)  | 2.1(4)   | 3.2(4)   | 2.2(4)   |
| C1   | 26.7(6)  | 21.5(5)  | 21.3(5)  | 0.5(4)   | 1.9(4)   | -0.4(4)  |
| C2   | 23.1(5)  | 20.0(5)  | 19.4(5)  | 0.5(4)   | -0.2(4)  | 0.1(4)   |
| C3   | 24.1(5)  | 21.7(5)  | 22.8(5)  | -1.9(4)  | -1.6(4)  | -0.1(4)  |
| C4   | 33.9(6)  | 26.8(6)  | 23.2(6)  | -2.2(5)  | -6.1(5)  | -1.4(5)  |
| C5   | 38.1(7)  | 25.8(6)  | 19.1(5)  | -1.3(4)  | 1.8(5)   | -3.4(5)  |
| C6   | 23.3(5)  | 20.1(5)  | 18.4(5)  | 0.9(4)   | 0.8(4)   | -2.9(4)  |
| C7   | 28.9(6)  | 24.1(6)  | 35.8(7)  | -5.1(5)  | -7.5(5)  | 5.3(5)   |
| C8   | 28.8(6)  | 30.5(7)  | 36.8(7)  | -5.4(5)  | -12.5(5) | 2.9(5)   |
| C9   | 26.4(6)  | 23.2(6)  | 17.7(5)  | 0.5(4)   | 1.9(4)   | -3.8(4)  |
| C10  | 29.4(6)  | 22.5(6)  | 24.5(5)  | -2.2(4)  | -1.8(5)  | 3.9(5)   |
| C11  | 24.5(6)  | 26.8(6)  | 23.8(5)  | -1.8(4)  | -4.3(4)  | 1.7(5)   |
| C12  | 32.8(6)  | 27.6(6)  | 24.9(6)  | -4.8(5)  | 0.6(5)   | -5.0(5)  |
| C13  | 50.8(9)  | 48.1(9)  | 31.4(7)  | -15.7(6) | 9.8(6)   | -13.5(7) |
| C14  | 43.2(8)  | 24.7(6)  | 50.9(8)  | -4.4(6)  | -7.0(6)  | -5.3(5)  |
| C15  | 35.0(7)  | 35.1(7)  | 32.5(6)  | -5.0(5)  | -6.2(5)  | -8.7(5)  |
| C16  | 21.9(5)  | 20.2(5)  | 21.0(5)  | -1.0(4)  | 1.0(4)   | -1.5(4)  |
| C17  | 23.0(5)  | 21.5(5)  | 22.7(5)  | -2.4(4)  | 0.4(4)   | -4.2(4)  |
| C18  | 67.1(10) | 35.4(7)  | 23.9(6)  | 6.7(5)   | 10.9(6)  | 2.2(7)   |
| C19  | 24.4(5)  | 22.4(5)  | 18.9(5)  | 1.8(4)   | 1.7(4)   | -0.6(4)  |
| C20  | 36.9(8)  | 42.2(8)  | 58.8(9)  | -13.4(7) | 3.9(7)   | 15.6(6)  |
| C21  | 23.5(5)  | 23.6(5)  | 19.7(5)  | 0.1(4)   | -1.9(4)  | -1.4(4)  |
| C22  | 29.1(6)  | 24.8(6)  | 28.7(6)  | 2.9(5)   | 1.8(5)   | 3.8(5)   |
| C23  | 40.6(7)  | 25.5(6)  | 31.5(6)  | 6.0(5)   | 3.7(5)   | -1.1(5)  |
| C24  | 33.0(7)  | 36.2(7)  | 28.8(6)  | 2.6(5)   | 7.5(5)   | -5.0(5)  |
| C25  | 25.8(6)  | 35.2(7)  | 25.4(6)  | -2.6(5)  | 1.2(5)   | 3.5(5)   |
| C26  | 27.9(6)  | 23.9(6)  | 22.6(5)  | 0.6(4)   | -0.8(5)  | 2.3(4)   |

**Table 5:** Bond Lengths in Å for **16b**.

| Atom | Atom | Length/Å   |
|------|------|------------|
| O1   | C17  | 1.2011(15) |
| O2   | C17  | 1.3357(15) |
| O2   | C18  | 1.4466(15) |
| O3   | C19  | 1.2055(15) |
| O4   | C19  | 1.3326(15) |
| O4   | C20  | 1.4434(16) |
| N1   | C1   | 1.4526(15) |
| N1   | C21  | 1.3834(15) |
| C1   | C2   | 1.5454(15) |
| C1   | C5   | 1.5497(16) |
| C2   | C3   | 1.5038(15) |
| C2   | C6   | 1.4949(15) |
| C2   | C16  | 1.5363(15) |
| C3   | C4   | 1.5134(16) |
| C3   | C16  | 1.5204(16) |
| C4   | C5   | 1.5402(18) |
| C6   | C7   | 1.3851(17) |
| C6   | C11  | 1.3872(17) |
| C7   | C8   | 1.3895(18) |
| C8   | C9   | 1.3908(17) |
| C9   | C10  | 1.3929(17) |
| C9   | C12  | 1.5358(16) |
| C10  | C11  | 1.3894(17) |
| C12  | C13  | 1.5302(18) |
| C12  | C14  | 1.5376(19) |
| C12  | C15  | 1.5342(19) |
| C16  | C17  | 1.5004(15) |
| C16  | C19  | 1.5004(16) |
| C21  | C22  | 1.4068(16) |
| C21  | C26  | 1.4012(17) |
| C22  | C23  | 1.3805(18) |
| C23  | C24  | 1.391(2)   |
| C24  | C25  | 1.3860(19) |
| C25  | C26  | 1.3892(17) |

**Table 6:** Bond Angles in ° for **16b**.

| Atom | Atom | Atom | Angle/°    |
|------|------|------|------------|
| C17  | O2   | C18  | 115.88(10) |
| C19  | O4   | C20  | 114.86(10) |
| C21  | N1   | C1   | 121.41(10) |
| N1   | C1   | C2   | 107.87(9)  |
| N1   | C1   | C5   | 112.27(9)  |
| C2   | C1   | C5   | 105.48(9)  |
| C3   | C2   | C1   | 106.81(9)  |
| C3   | C2   | C16  | 60.00(7)   |
| C6   | C2   | C1   | 116.64(9)  |
| C6   | C2   | C3   | 126.79(10) |
| C6   | C2   | C16  | 119.85(9)  |
| C16  | C2   | C1   | 114.68(9)  |
| C2   | C3   | C4   | 109.59(10) |
| C2   | C3   | C16  | 61.06(7)   |



| Atom | Atom | Atom | Angle/°    |
|------|------|------|------------|
| C4   | C3   | C16  | 117.59(10) |
| C3   | C4   | C5   | 105.09(9)  |
| C4   | C5   | C1   | 105.50(9)  |
| C7   | C6   | C2   | 119.30(10) |
| C7   | C6   | C11  | 117.85(10) |
| C11  | C6   | C2   | 122.72(10) |
| C6   | C7   | C8   | 121.18(11) |
| C7   | C8   | C9   | 121.57(11) |
| C8   | C9   | C10  | 116.45(11) |
| C8   | C9   | C12  | 122.20(11) |
| C10  | C9   | C12  | 121.36(11) |
| C11  | C10  | C9   | 122.16(11) |
| C6   | C11  | C10  | 120.49(11) |
| C9   | C12  | C14  | 110.10(10) |
| C13  | C12  | C9   | 109.27(10) |
| C13  | C12  | C14  | 109.56(12) |
| C13  | C12  | C15  | 109.05(11) |
| C15  | C12  | C9   | 111.35(10) |
| C15  | C12  | C14  | 107.48(11) |
| C3   | C16  | C2   | 58.94(7)   |
| C17  | C16  | C2   | 117.23(9)  |
| C17  | C16  | C3   | 114.21(9)  |
| C19  | C16  | C2   | 121.63(9)  |
| C19  | C16  | C3   | 123.83(9)  |
| C19  | C16  | C17  | 111.73(9)  |
| O1   | C17  | O2   | 124.78(11) |
| O1   | C17  | C16  | 124.80(11) |
| O2   | C17  | C16  | 110.39(9)  |
| O3   | C19  | O4   | 123.99(11) |
| O3   | C19  | C16  | 125.12(11) |
| O4   | C19  | C16  | 110.88(10) |
| N1   | C21  | C22  | 118.44(11) |
| N1   | C21  | C26  | 123.50(11) |
| C26  | C21  | C22  | 117.96(11) |
| C23  | C22  | C21  | 120.96(12) |
| C22  | C23  | C24  | 120.72(12) |
| C25  | C24  | C23  | 118.78(12) |
| C24  | C25  | C26  | 121.15(12) |
| C25  | C26  | C21  | 120.37(11) |

**Table 7:** Torsion Angles in ° for **16b**.

| Atom | Atom | Atom | Atom | Angle/°     |
|------|------|------|------|-------------|
| N1   | C1   | C2   | C3   | 105.41(10)  |
| N1   | C1   | C2   | C6   | -42.95(13)  |
| N1   | C1   | C2   | C16  | 169.56(9)   |
| N1   | C1   | C5   | C4   | -91.34(11)  |
| N1   | C21  | C22  | C23  | 174.43(12)  |
| N1   | C21  | C26  | C25  | -173.31(11) |
| C1   | N1   | C21  | C22  | 167.58(11)  |
| C1   | N1   | C21  | C26  | -16.23(17)  |
| C1   | C2   | C3   | C4   | -2.18(12)   |
| C1   | C2   | C3   | C16  | 109.22(10)  |
| C1   | C2   | C6   | C7   | -71.69(14)  |

| Atom | Atom | Atom | Atom | Angle/°     |
|------|------|------|------|-------------|
| C1   | C2   | C6   | C11  | 103.95(13)  |
| C1   | C2   | C16  | C3   | -95.87(10)  |
| C1   | C2   | C16  | C17  | 160.93(10)  |
| C1   | C2   | C16  | C19  | 17.23(15)   |
| C2   | C1   | C5   | C4   | 25.88(12)   |
| C2   | C3   | C4   | C5   | 18.32(13)   |
| C2   | C3   | C16  | C17  | 108.35(10)  |
| C2   | C3   | C16  | C19  | -109.47(12) |
| C2   | C6   | C7   | C8   | 171.18(12)  |
| C2   | C6   | C11  | C10  | -171.72(11) |
| C2   | C16  | C17  | O1   | 48.11(16)   |
| C2   | C16  | C17  | O2   | -133.82(10) |
| C2   | C16  | C19  | O3   | -128.14(12) |
| C2   | C16  | C19  | O4   | 53.38(13)   |
| C3   | C2   | C6   | C7   | 147.14(12)  |
| C3   | C2   | C6   | C11  | -37.22(17)  |
| C3   | C2   | C16  | C17  | -103.20(11) |
| C3   | C2   | C16  | C19  | 113.10(12)  |
| C3   | C4   | C5   | C1   | -27.09(12)  |
| C3   | C16  | C17  | O1   | -18.00(16)  |
| C3   | C16  | C17  | O2   | 160.07(9)   |
| C3   | C16  | C19  | O3   | -56.61(16)  |
| C3   | C16  | C19  | O4   | 124.92(11)  |
| C4   | C3   | C16  | C2   | 98.25(11)   |
| C4   | C3   | C16  | C17  | -153.40(10) |
| C4   | C3   | C16  | C19  | -11.22(16)  |
| C5   | C1   | C2   | C3   | -14.76(12)  |
| C5   | C1   | C2   | C6   | -163.12(10) |
| C5   | C1   | C2   | C16  | 49.39(12)   |
| C6   | C2   | C3   | C4   | 141.98(11)  |
| C6   | C2   | C3   | C16  | -106.62(12) |
| C6   | C2   | C16  | C3   | 117.77(12)  |
| C6   | C2   | C16  | C17  | 14.57(15)   |
| C6   | C2   | C16  | C19  | -129.13(11) |
| C6   | C7   | C8   | C9   | 0.6(2)      |
| C7   | C6   | C11  | C10  | 3.97(17)    |
| C7   | C8   | C9   | C10  | 4.09(19)    |
| C7   | C8   | C9   | C12  | -175.55(12) |
| C8   | C9   | C10  | C11  | -4.78(18)   |
| C8   | C9   | C12  | C13  | -99.20(15)  |
| C8   | C9   | C12  | C14  | 140.43(13)  |
| C8   | C9   | C12  | C15  | 21.32(16)   |
| C9   | C10  | C11  | C6   | 0.80(18)    |
| C10  | C9   | C12  | C13  | 81.18(15)   |
| C10  | C9   | C12  | C14  | -39.19(16)  |
| C10  | C9   | C12  | C15  | -158.30(11) |
| C11  | C6   | C7   | C8   | -4.66(19)   |
| C12  | C9   | C10  | C11  | 174.86(11)  |
| C16  | C2   | C3   | C4   | -111.40(10) |
| C16  | C2   | C6   | C7   | 74.04(14)   |
| C16  | C2   | C6   | C11  | -110.32(13) |
| C16  | C3   | C4   | C5   | -48.51(13)  |
| C17  | C16  | C19  | O3   | 86.38(14)   |
| C17  | C16  | C19  | O4   | -92.10(11)  |
| C18  | O2   | C17  | O1   | 1.42(18)    |

| Atom | Atom | Atom | Atom | Angle/°     |
|------|------|------|------|-------------|
| C18  | O2   | C17  | C16  | -176.65(11) |
| C19  | C16  | C17  | O1   | -164.75(11) |
| C19  | C16  | C17  | O2   | 13.32(13)   |
| C20  | O4   | C19  | O3   | -0.65(17)   |
| C20  | O4   | C19  | C16  | 177.85(11)  |
| C21  | N1   | C1   | C2   | 172.76(10)  |
| C21  | N1   | C1   | C5   | -71.44(14)  |
| C21  | C22  | C23  | C24  | -0.3(2)     |
| C22  | C21  | C26  | C25  | 2.89(17)    |
| C22  | C23  | C24  | C25  | 1.8(2)      |
| C23  | C24  | C25  | C26  | -0.8(2)     |
| C24  | C25  | C26  | C21  | -1.54(19)   |
| C26  | C21  | C22  | C23  | -1.97(18)   |

**Table 8:** Hydrogen Fractional Atomic Coordinates ( $\times 10^4$ ) and Equivalent Isotropic Displacement Parameters ( $\text{\AA}^2 \times 10^3$ ) for **16b**.  $U_{eq}$  is defined as 1/3 of the trace of the orthogonalised  $U_{ij}$ .

| Atom | x        | y        | z       | $U_{eq}$ |
|------|----------|----------|---------|----------|
| H1   | 5797(11) | 7204(13) | 2322(7) | 33(4)    |
| H1A  | 6702.75  | 5450.98  | 2582.72 | 28       |
| H3   | 4278.74  | 5649.28  | 3059.94 | 27       |
| H4A  | 4488.29  | 5709.33  | 2012.09 | 34       |
| H4B  | 4483.11  | 4484.83  | 2127.79 | 34       |
| H5A  | 5766.17  | 5357.62  | 1643.89 | 33       |
| H5B  | 5880.87  | 4357.39  | 2048.49 | 33       |
| H7   | 6828.49  | 5895.56  | 3826.89 | 36       |
| H8   | 7236.4   | 7252.4   | 4433.96 | 38       |
| H10  | 5181.03  | 8832.5   | 4013.48 | 31       |
| H11  | 4783.13  | 7491.86  | 3391.42 | 30       |
| H13A | 6317.61  | 9744.07  | 5473.56 | 65       |
| H13B | 6287.71  | 8511.75  | 5445.59 | 65       |
| H13C | 5552.15  | 9176.73  | 5188.35 | 65       |
| H14A | 6618.34  | 10218.52 | 3940.13 | 59       |
| H14B | 6560.53  | 10794.94 | 4551.36 | 59       |
| H14C | 5769.63  | 10267.05 | 4277.68 | 59       |
| H15A | 7661.87  | 8552.87  | 4968.44 | 51       |
| H15B | 7686.73  | 9784.78  | 4933.06 | 51       |
| H15C | 7788.85  | 9111.04  | 4357.18 | 51       |
| H18A | 4518.18  | 3382.9   | 4735.37 | 63       |
| H18B | 5298.19  | 3969.75  | 4986.07 | 63       |
| H18C | 5345.84  | 2763.73  | 4843.57 | 63       |
| H20A | 6899.16  | 2633.98  | 2535.95 | 69       |
| H20B | 6841.61  | 2190.23  | 3181.14 | 69       |
| H20C | 7596.13  | 2896.17  | 2996.35 | 69       |
| H22  | 6285.37  | 8587.14  | 1745.57 | 33       |
| H23  | 7213.22  | 9173.86  | 1047.8  | 39       |
| H24  | 8295.87  | 8101.67  | 733.67  | 39       |
| H25  | 8393.12  | 6402.64  | 1098.71 | 35       |
| H26  | 7446.73  | 5780.83  | 1780.52 | 30       |

## 9. Spectra of New Compounds

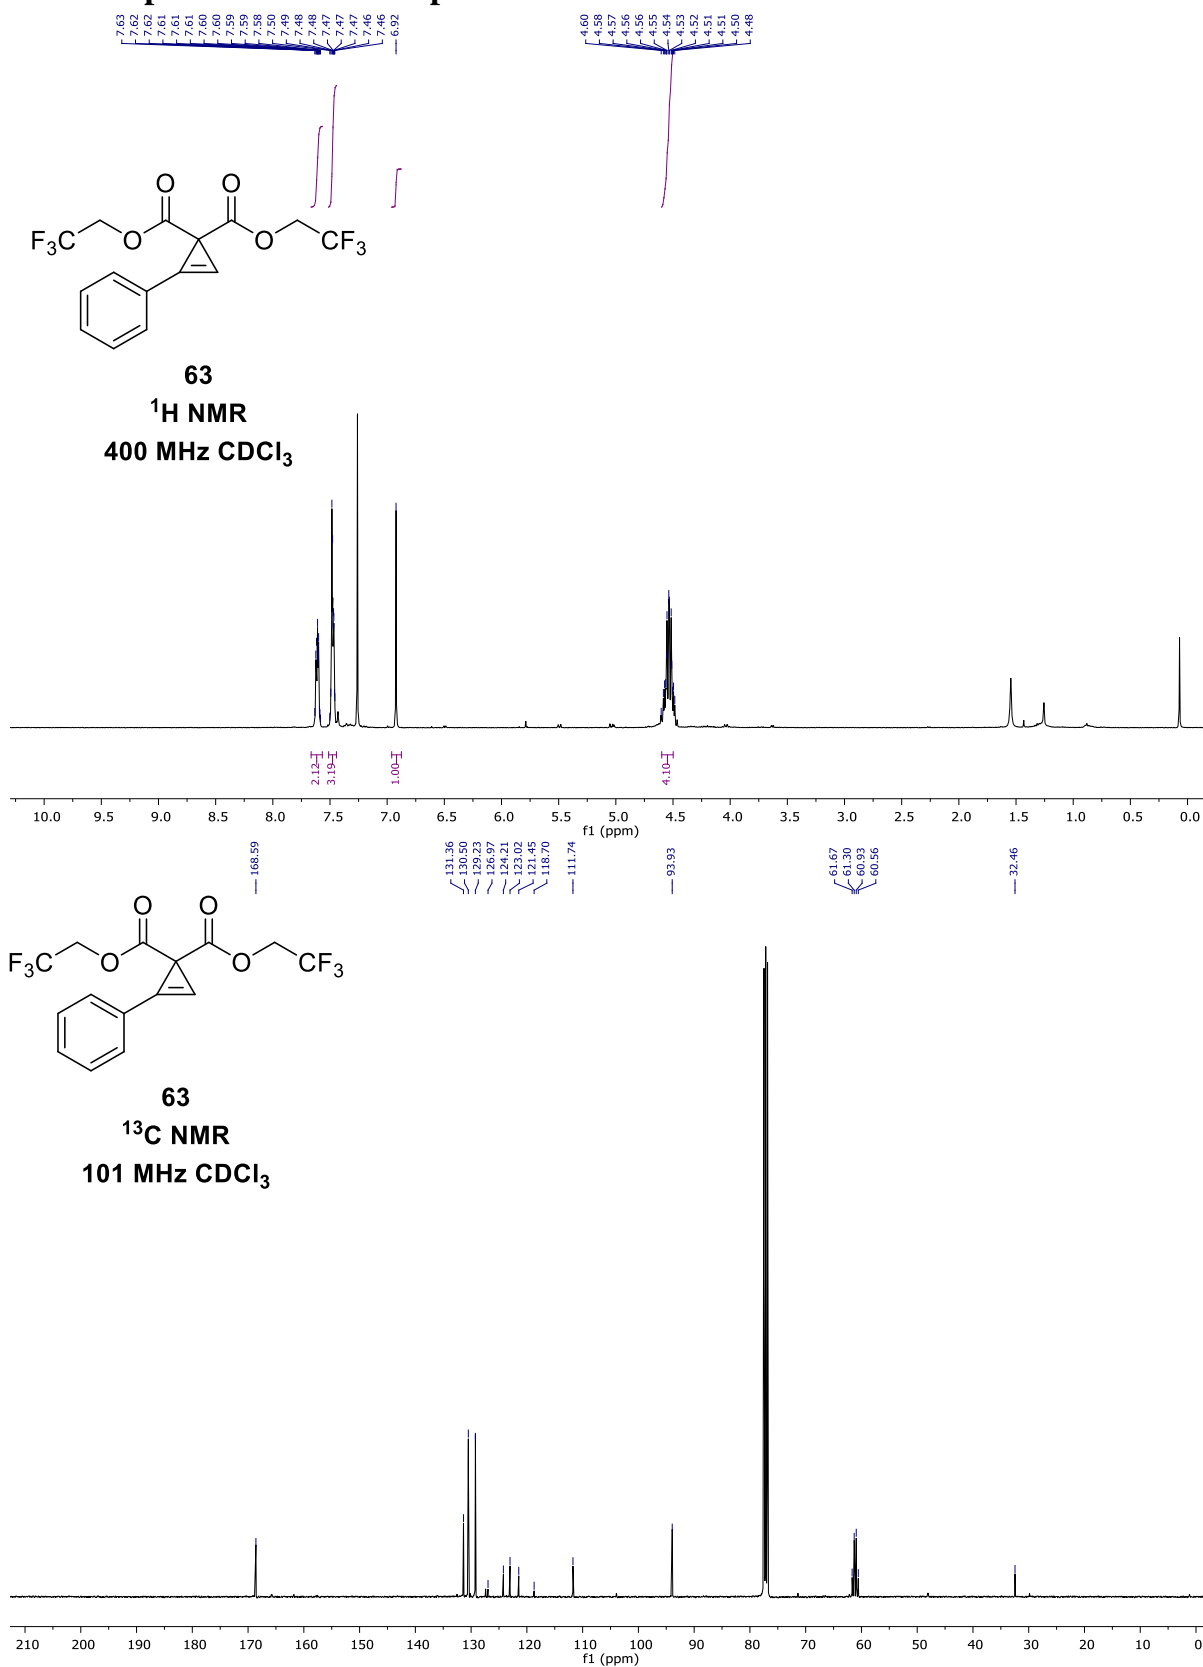

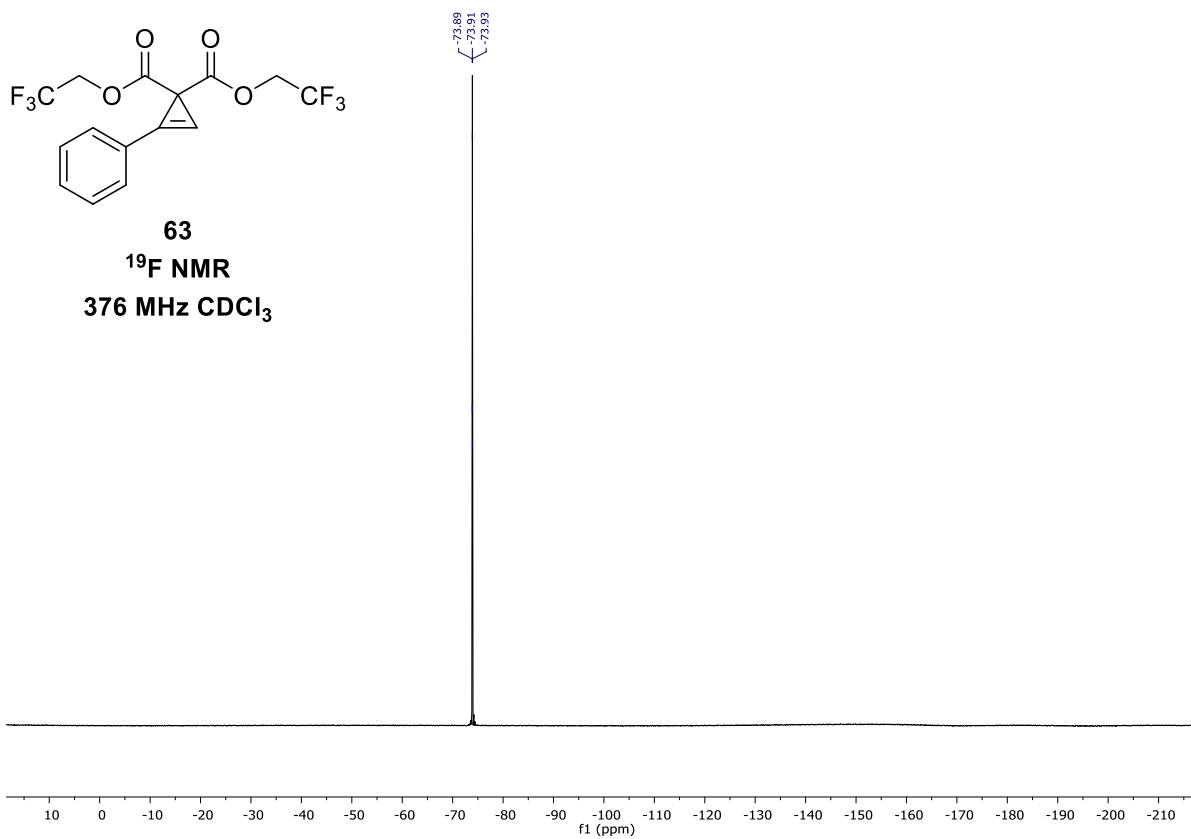

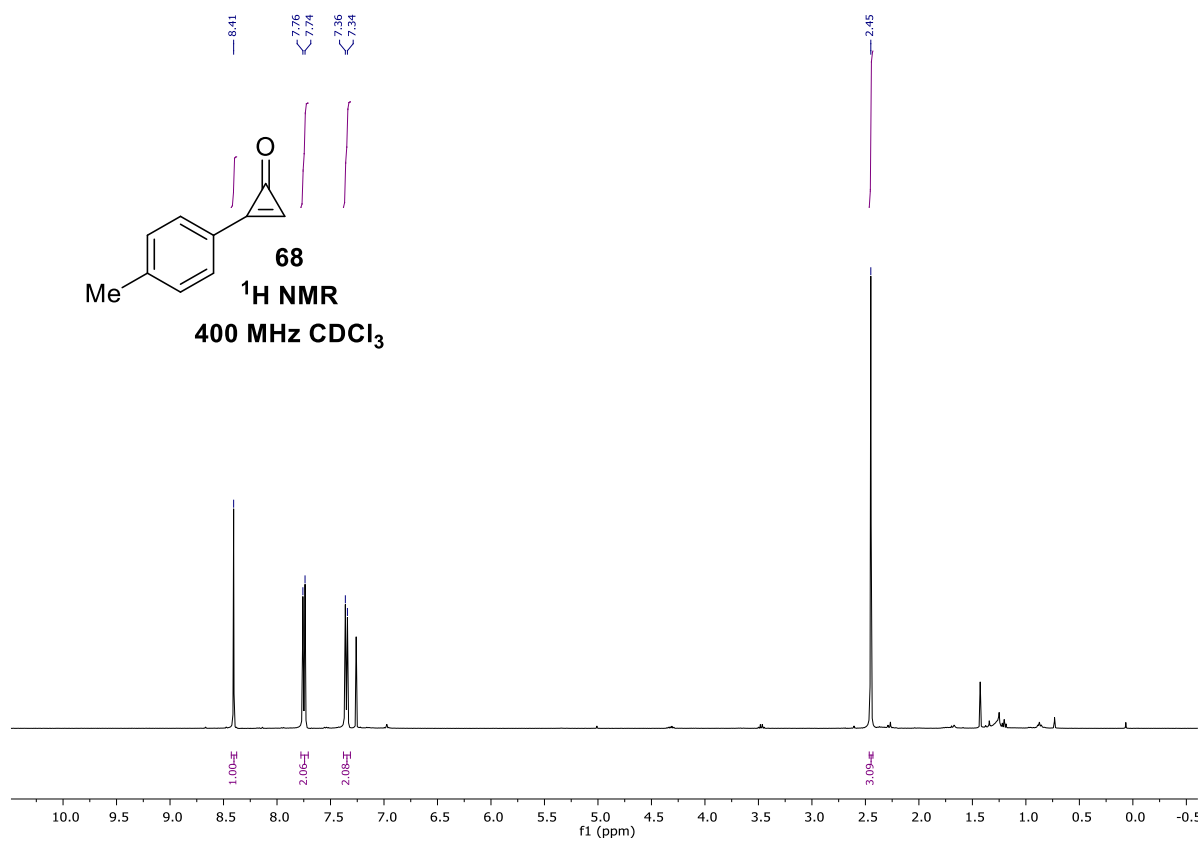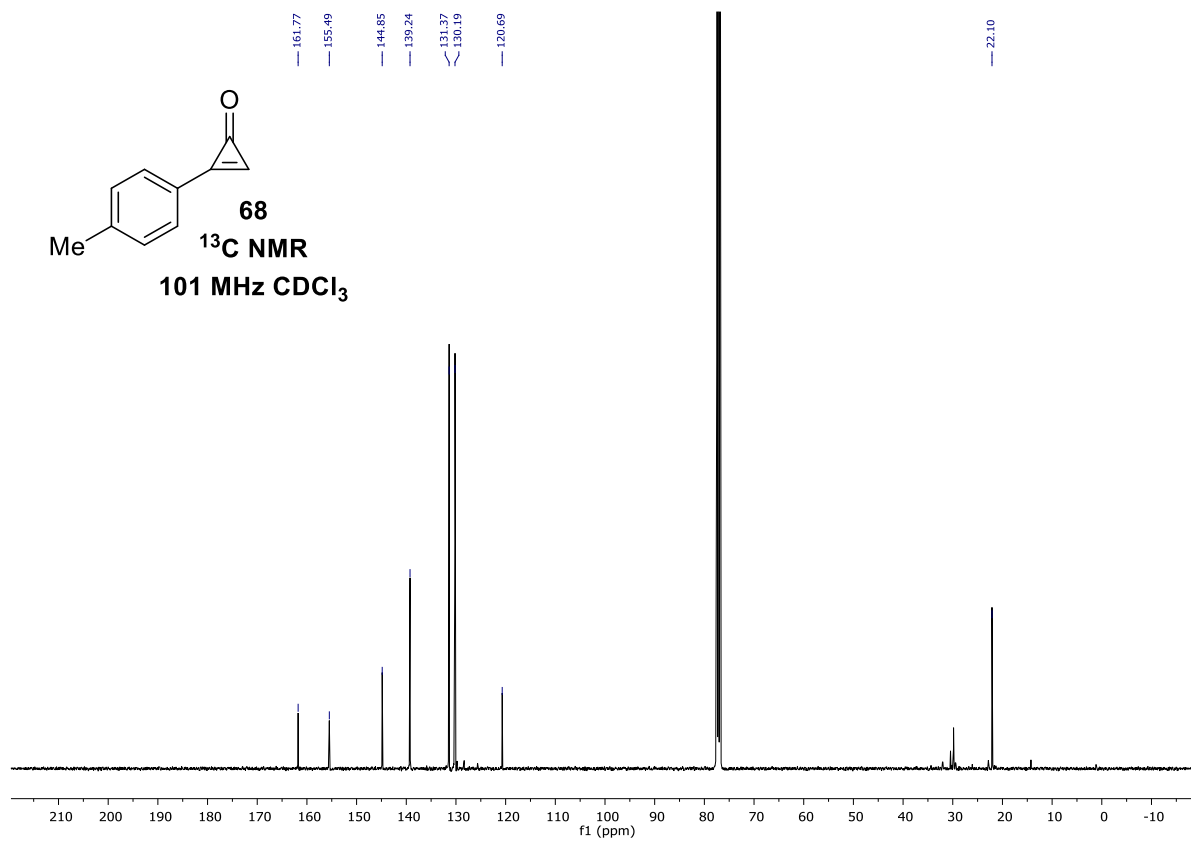

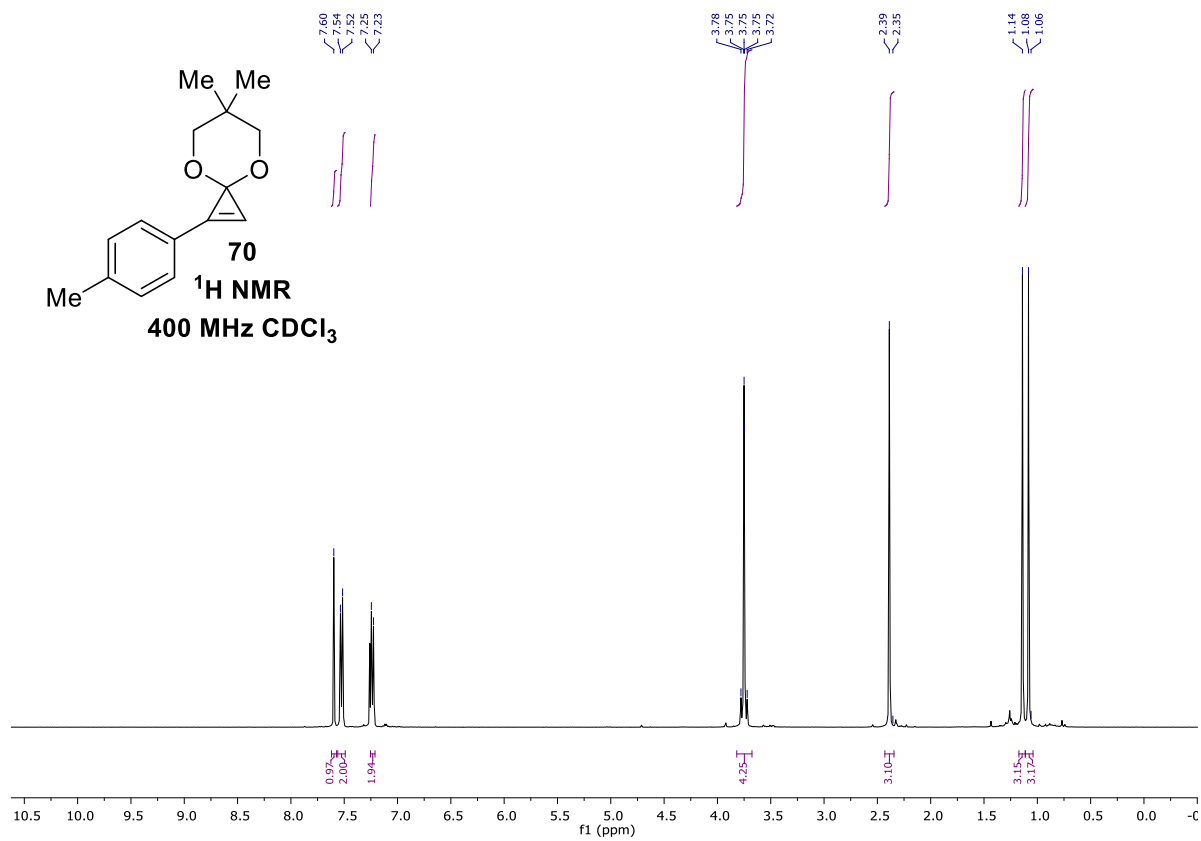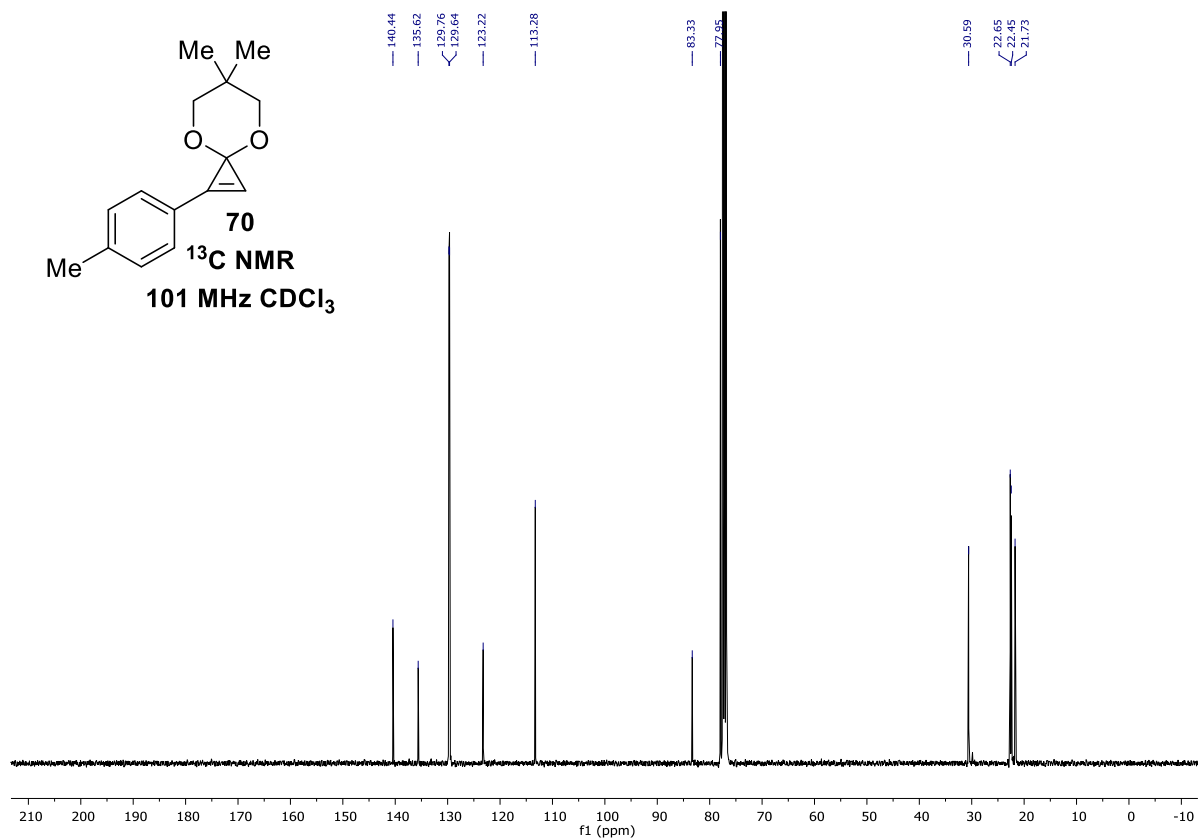

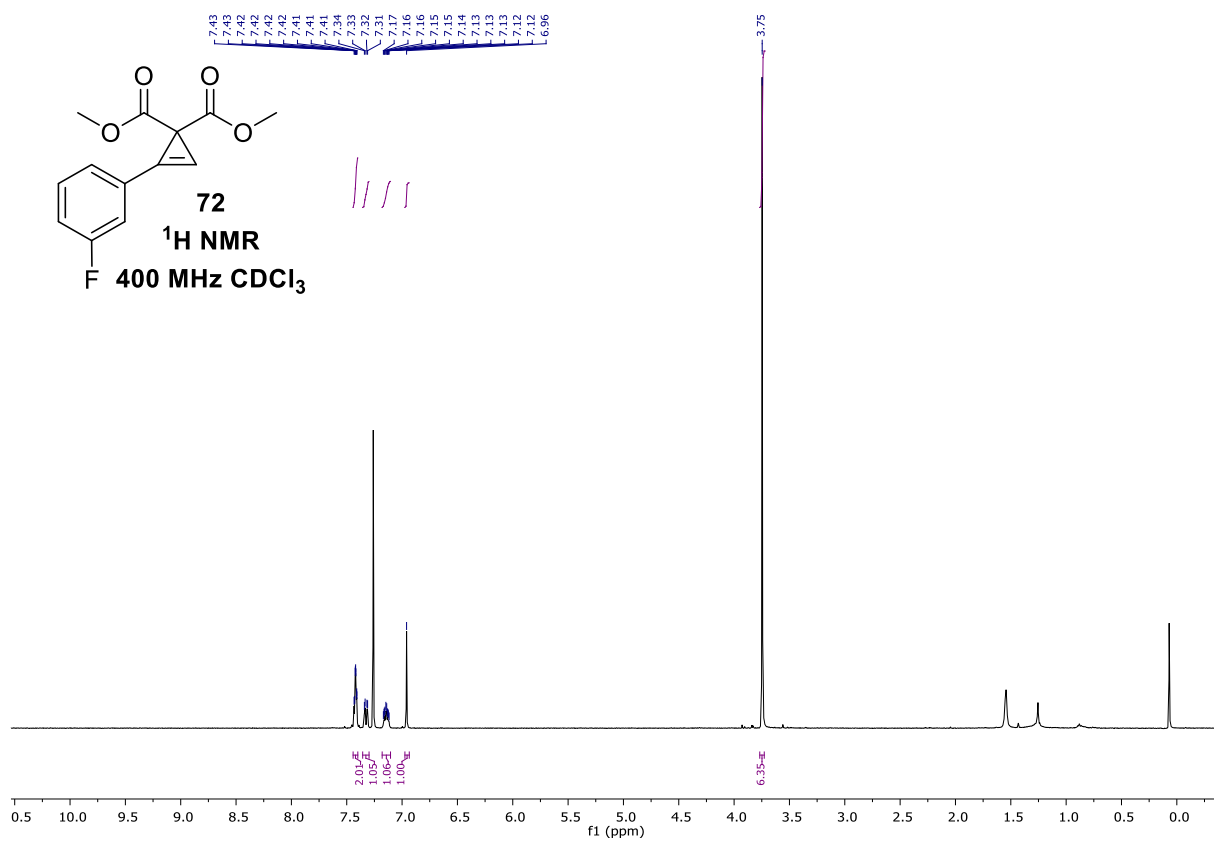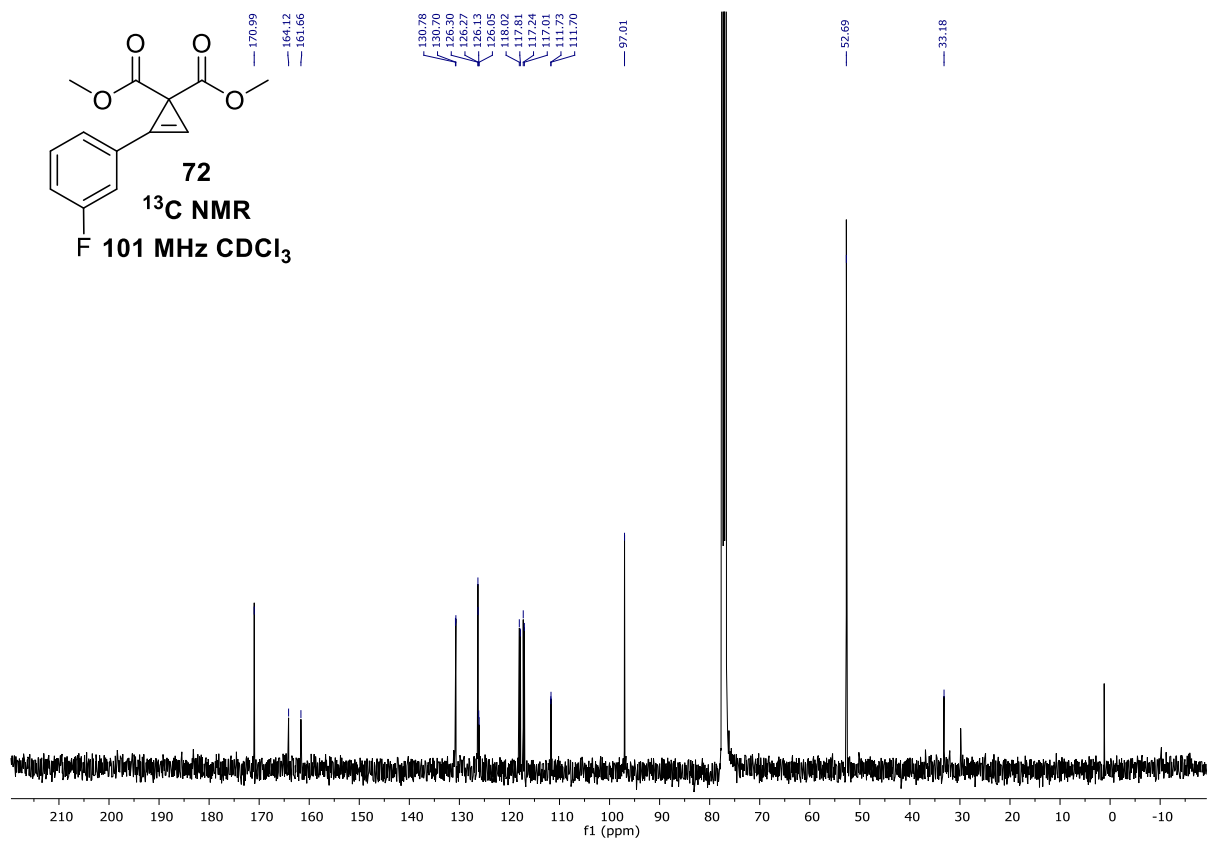



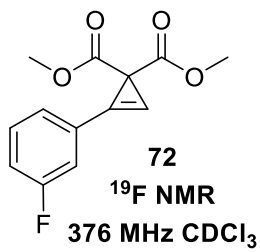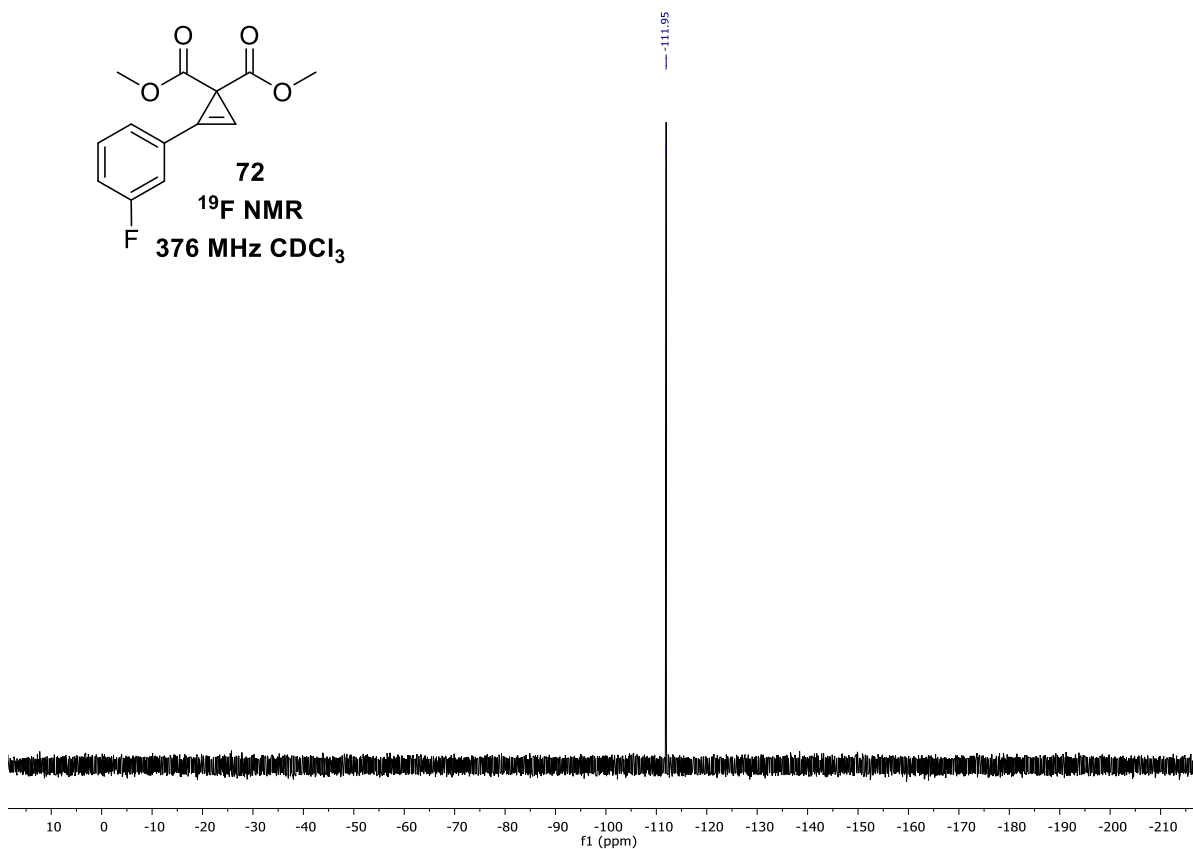

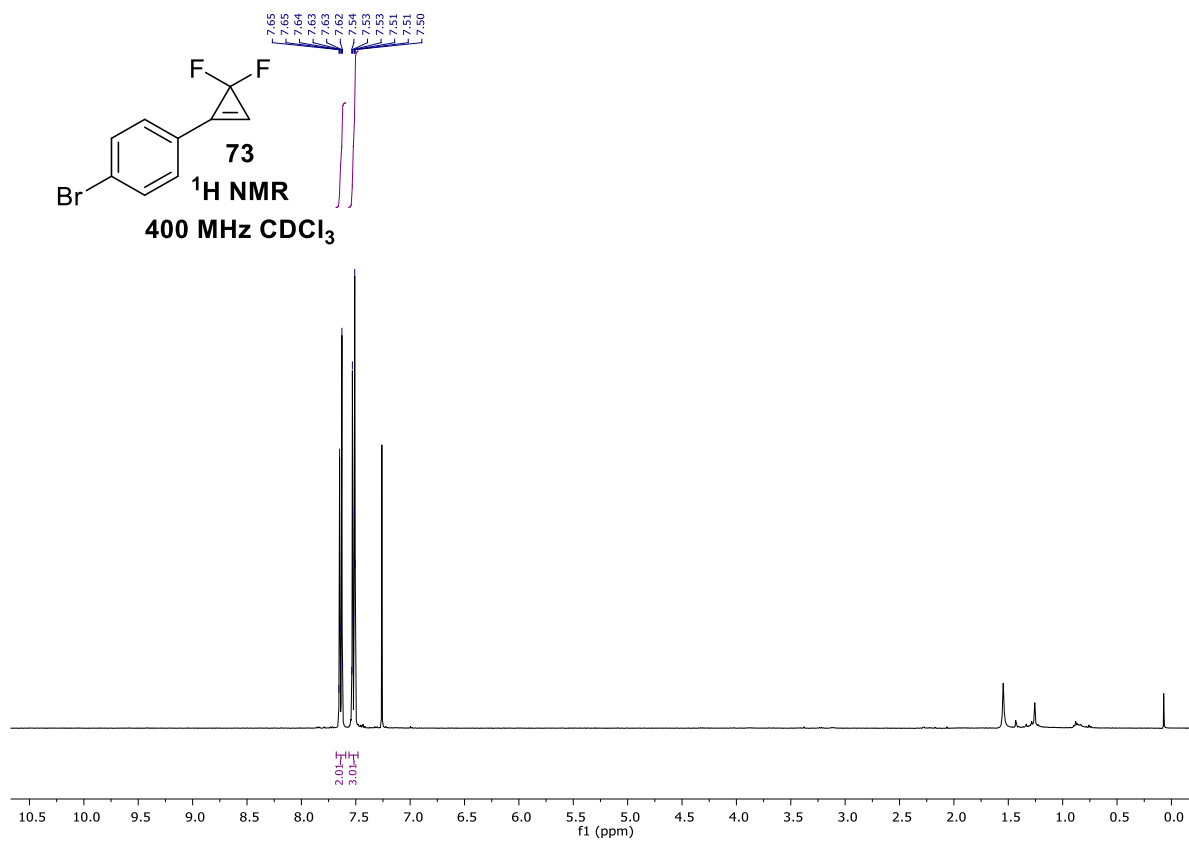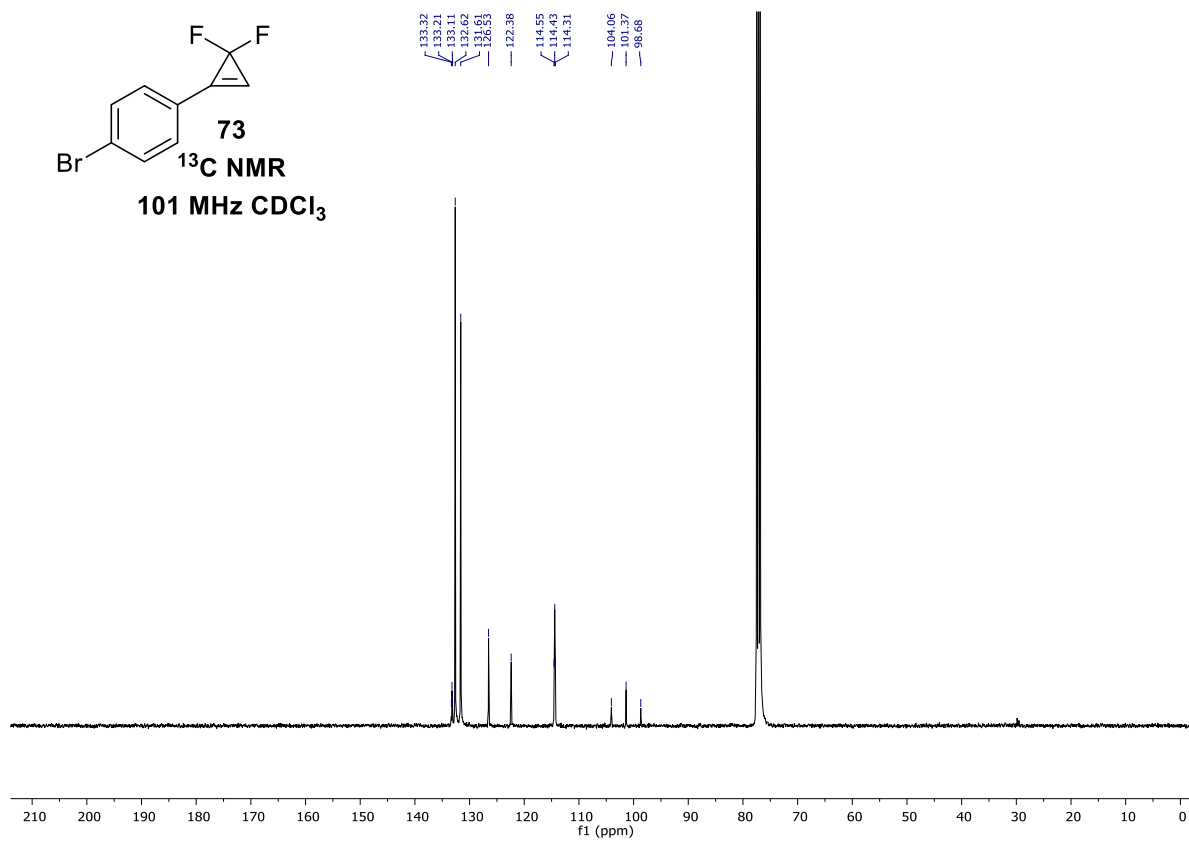

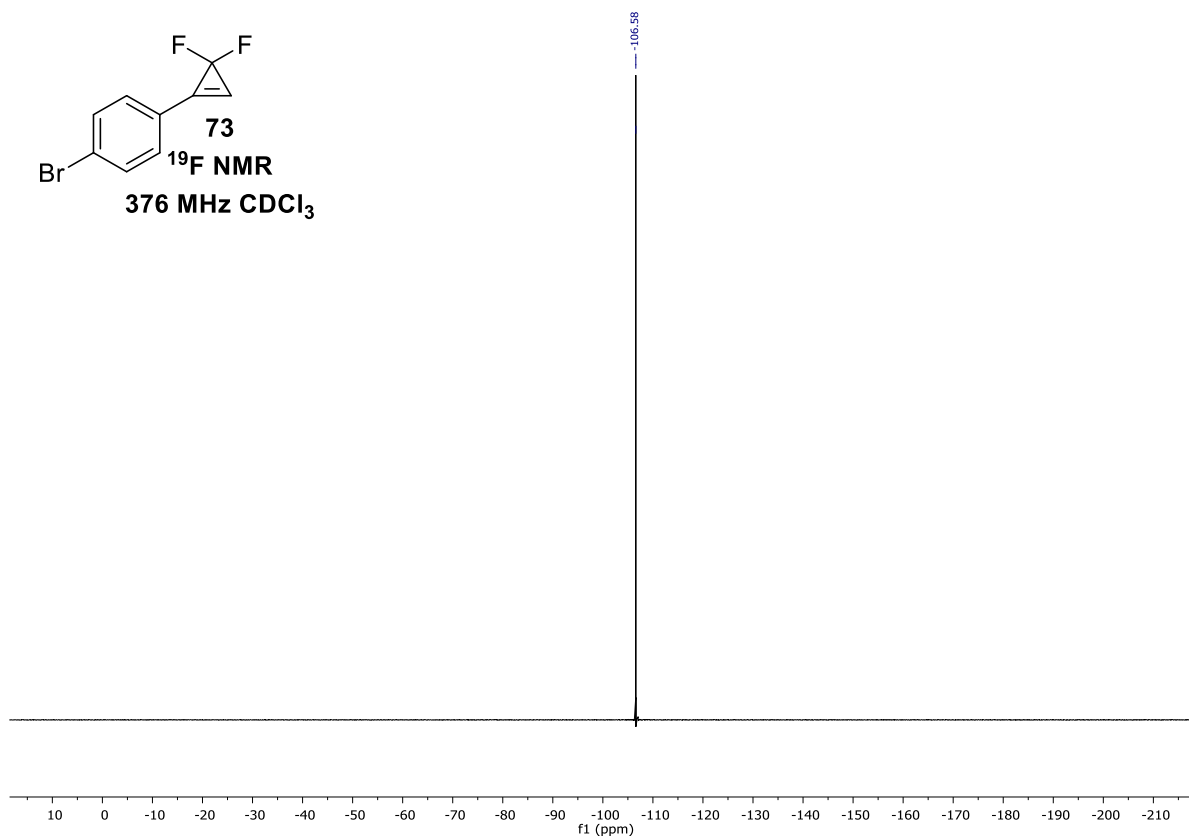

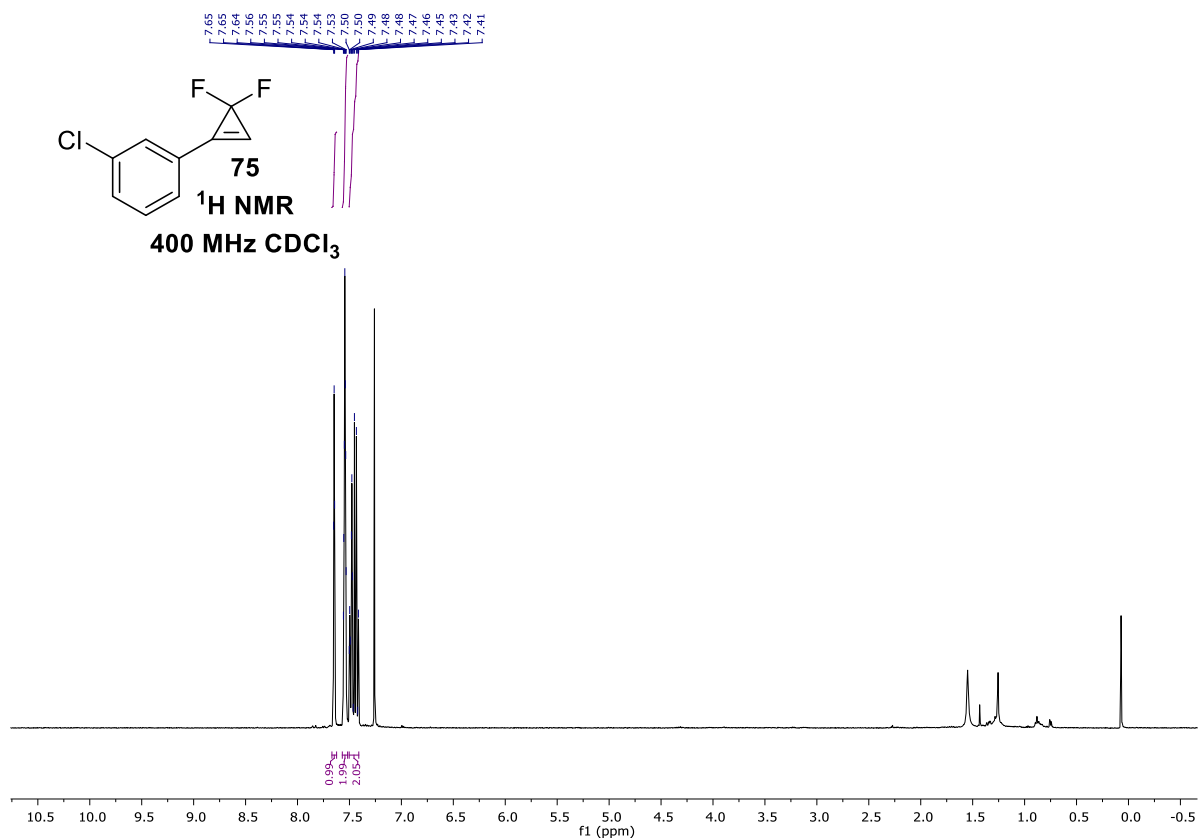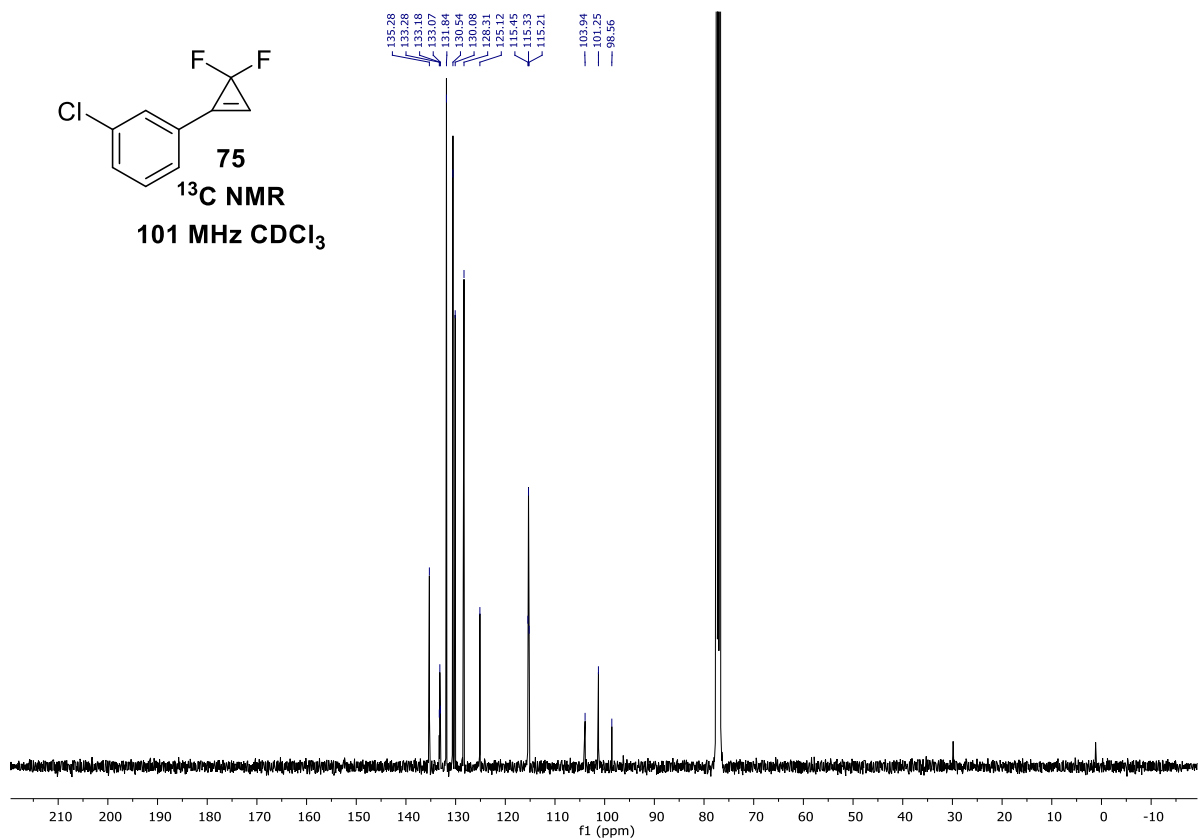

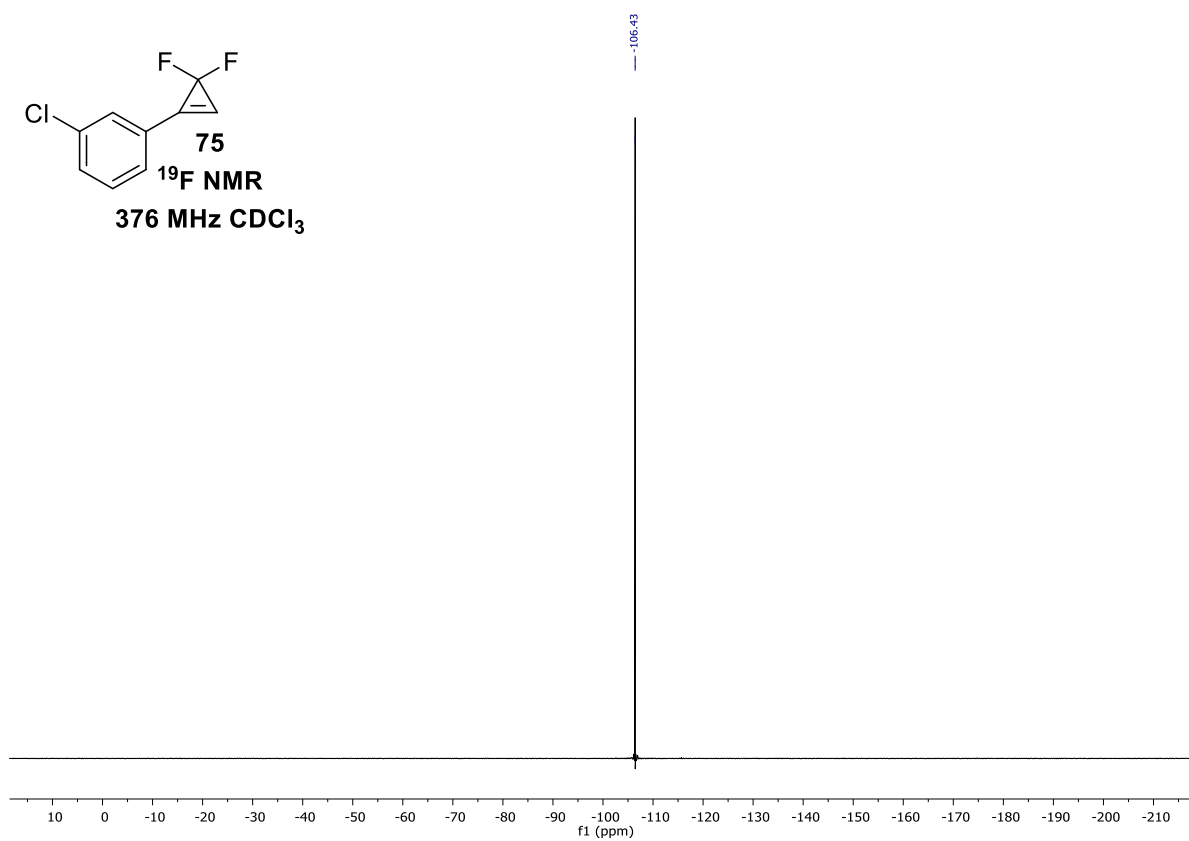

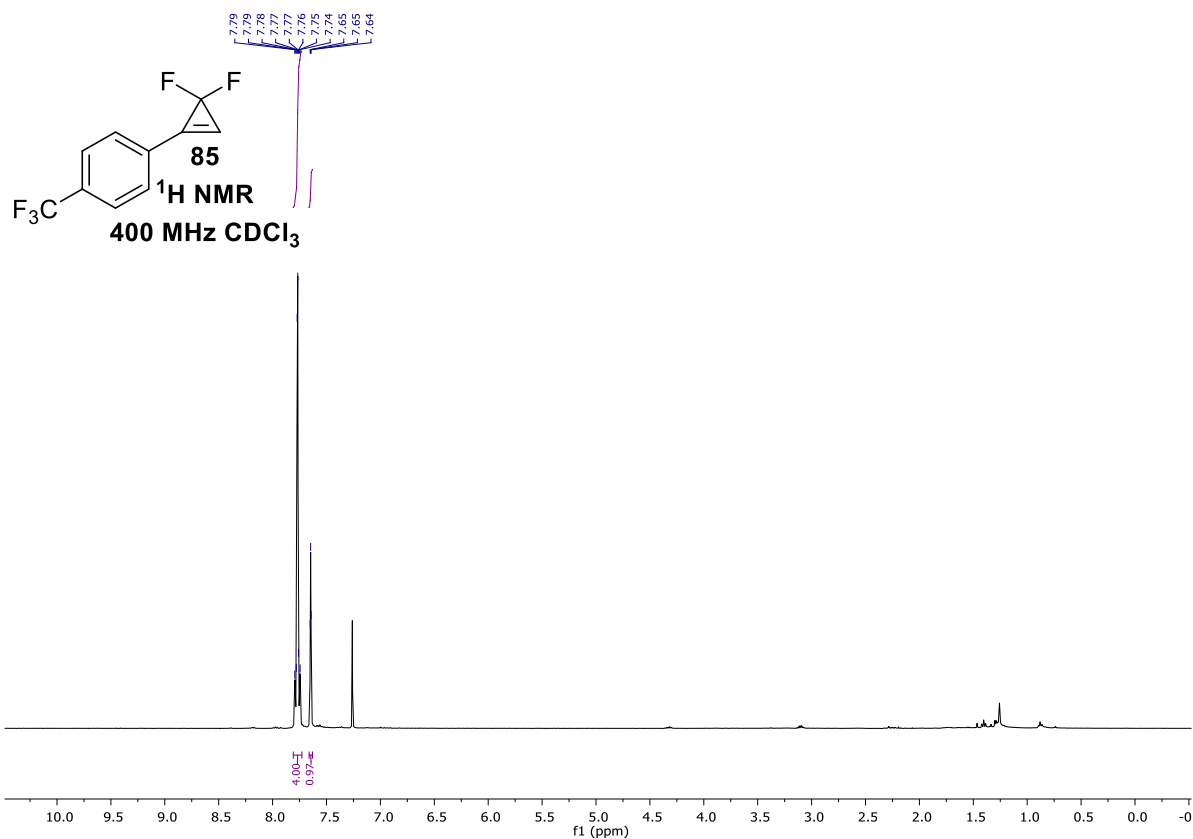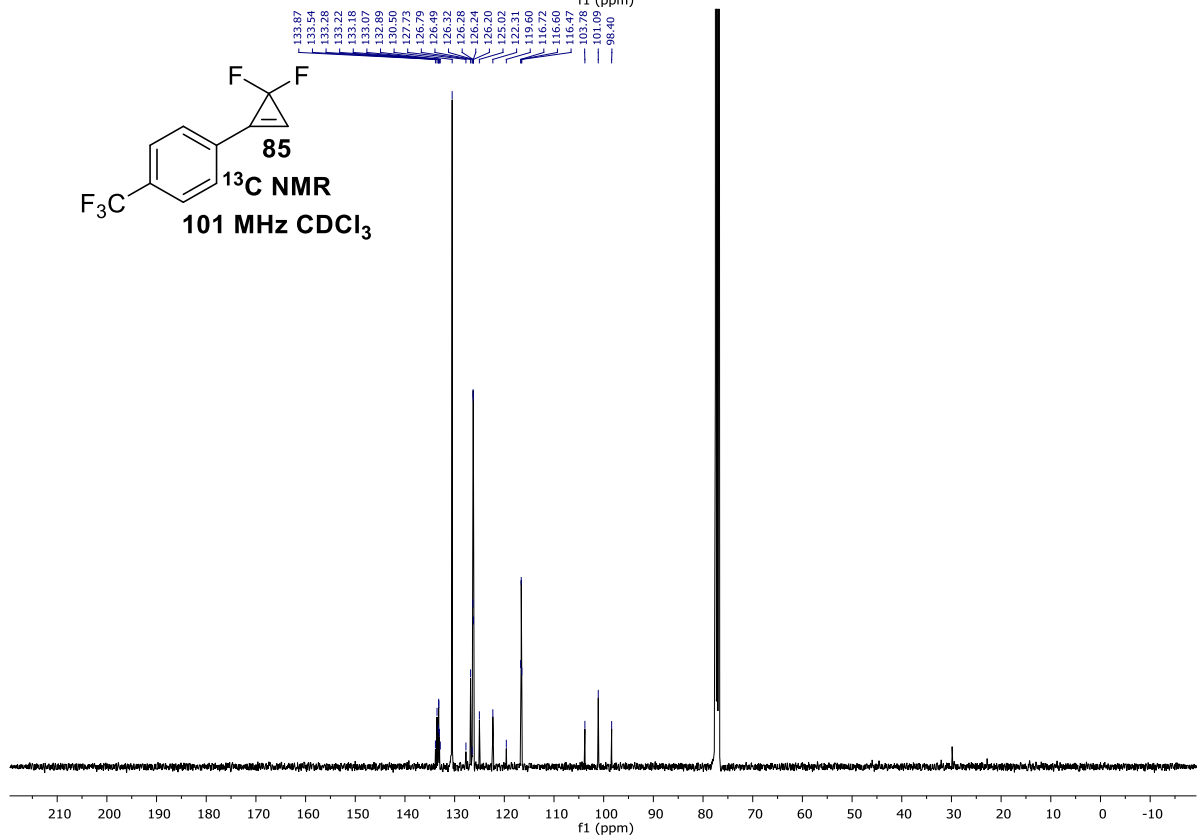

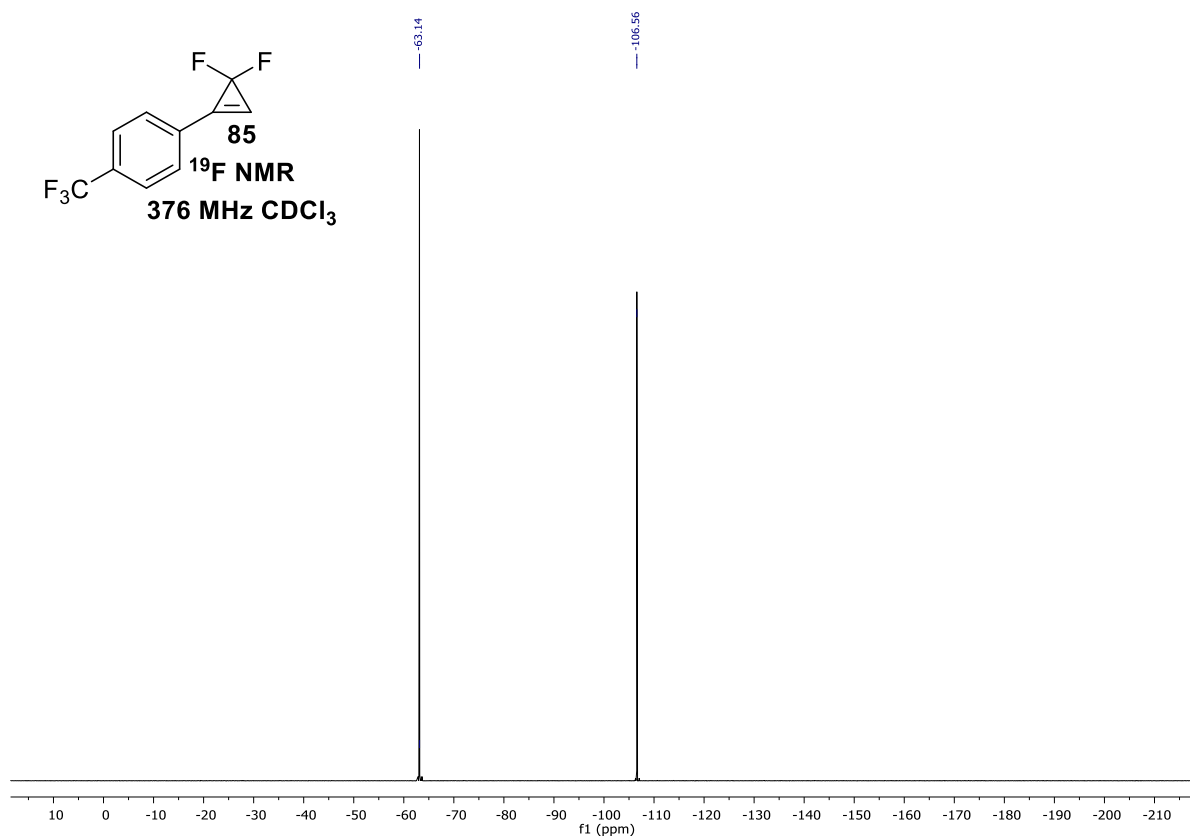

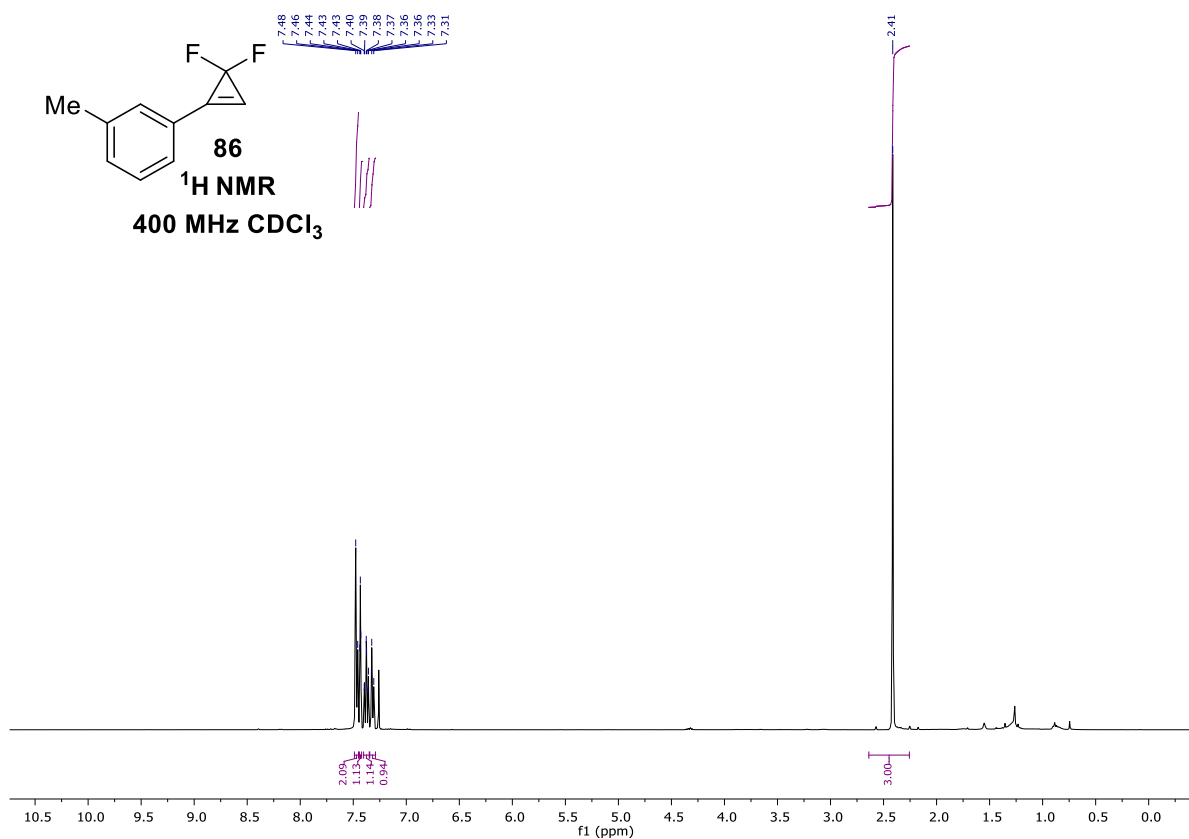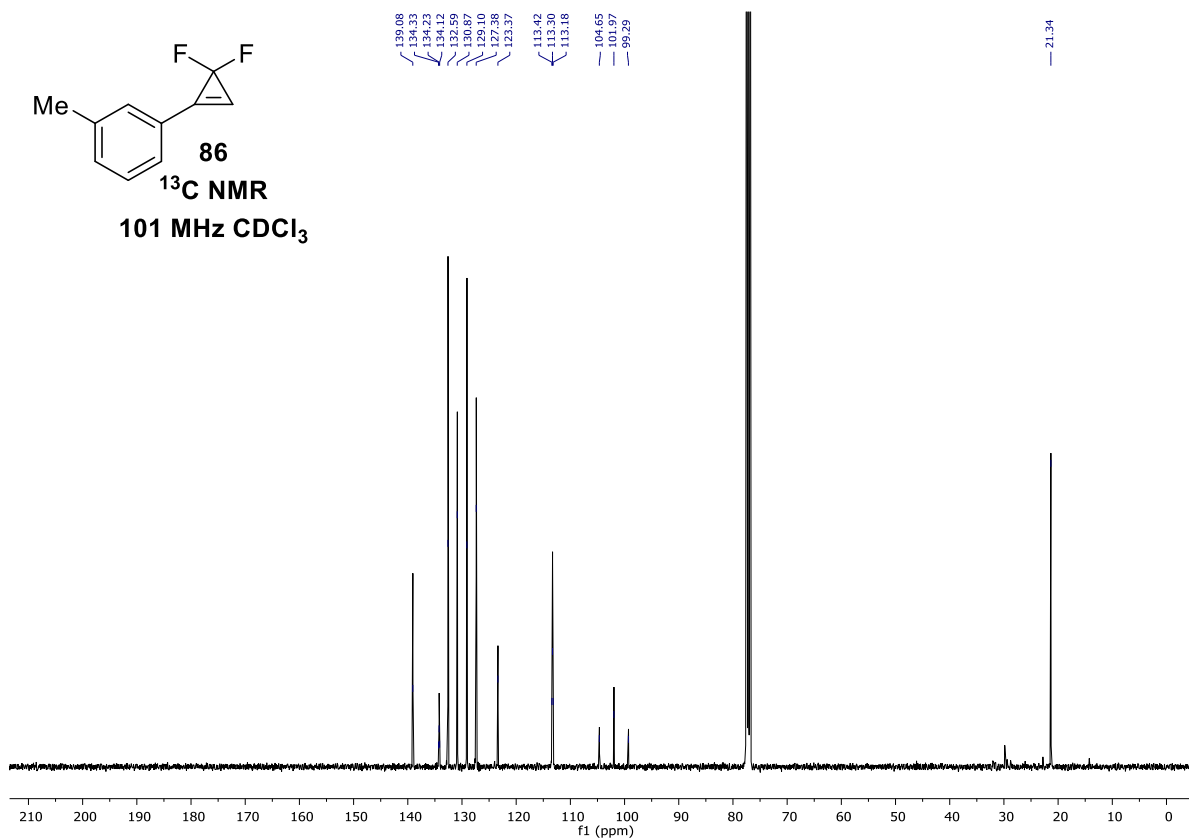



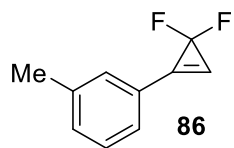

86

$^{19}\text{F}$  NMR

376 MHz  $\text{CDCl}_3$

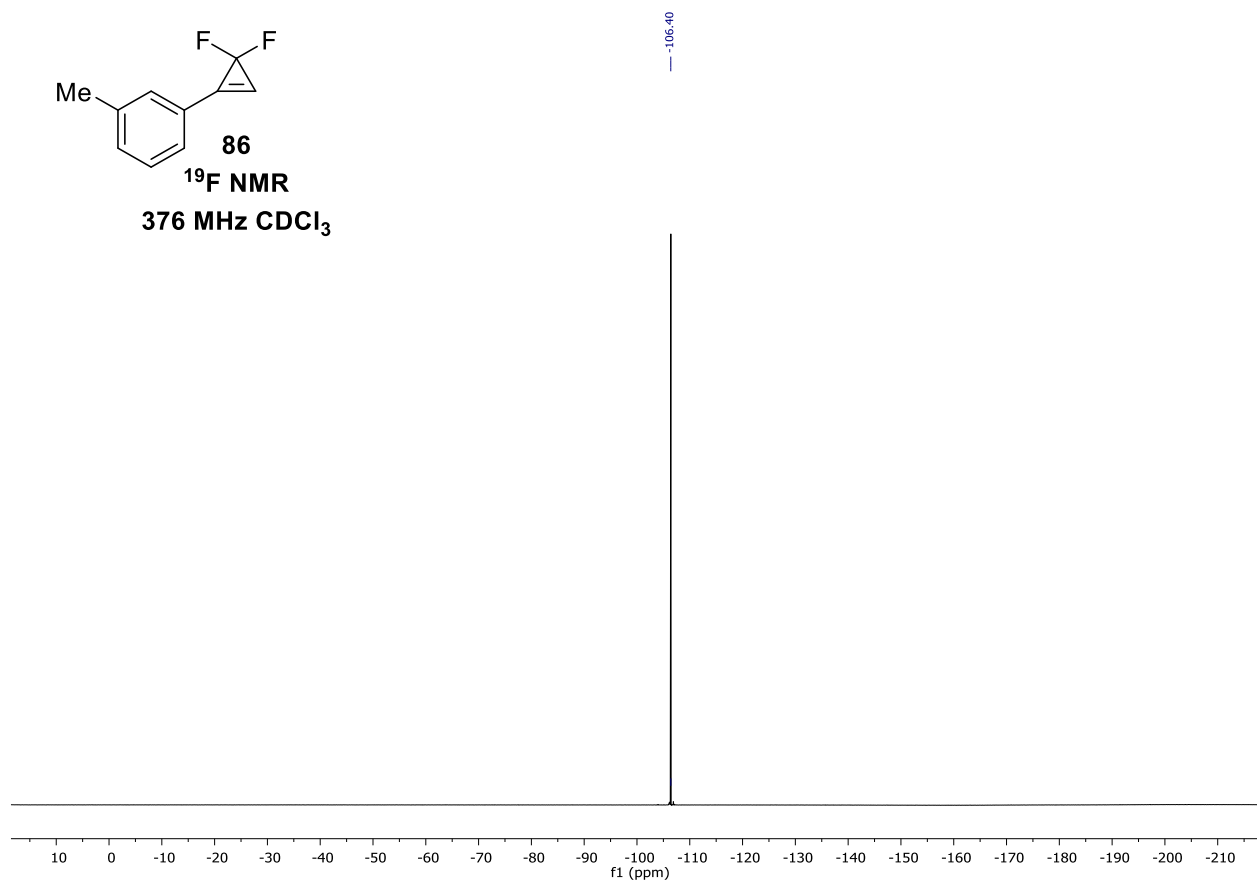

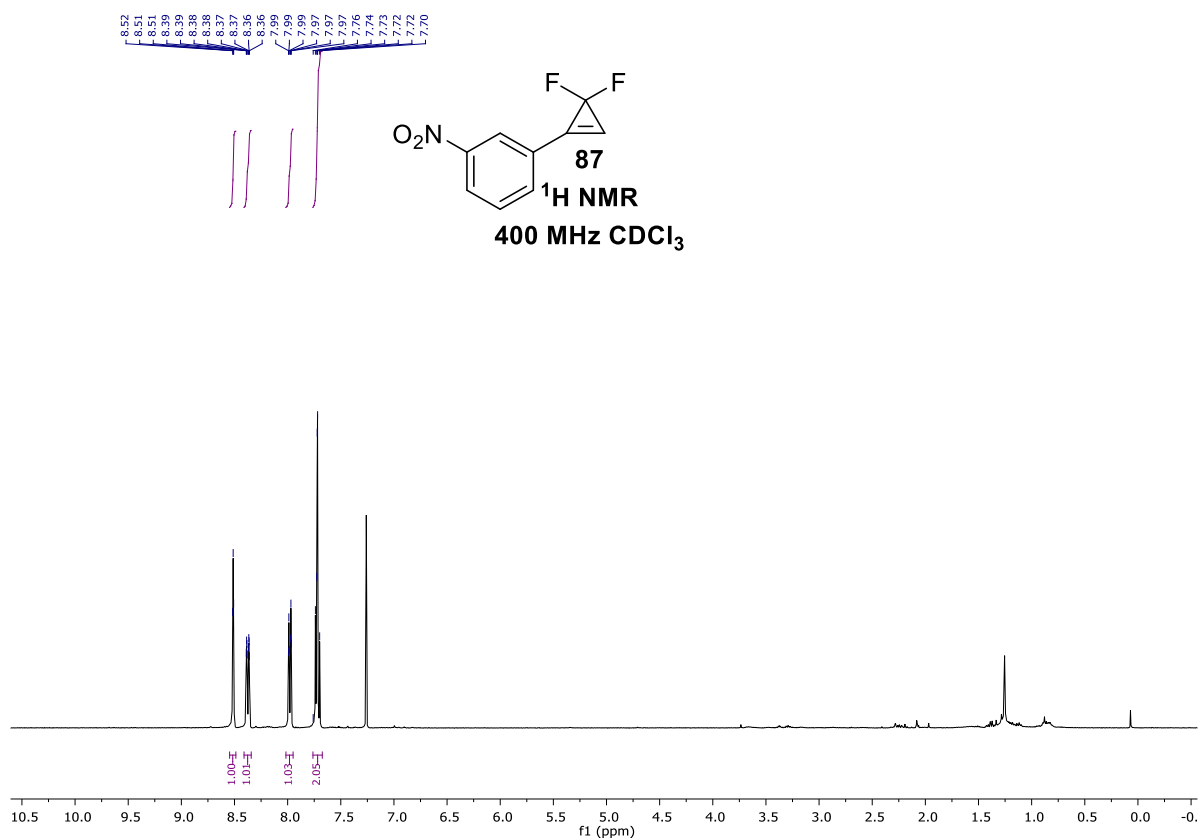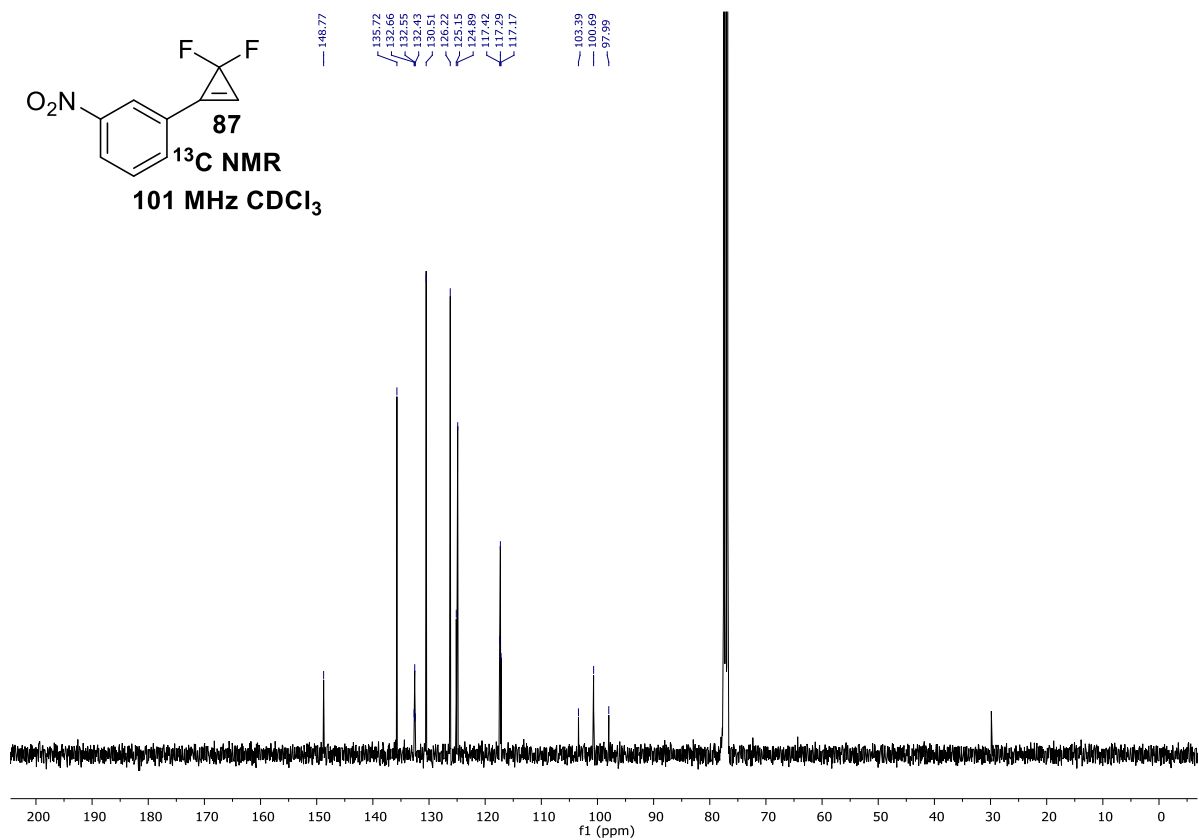

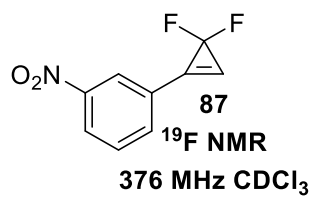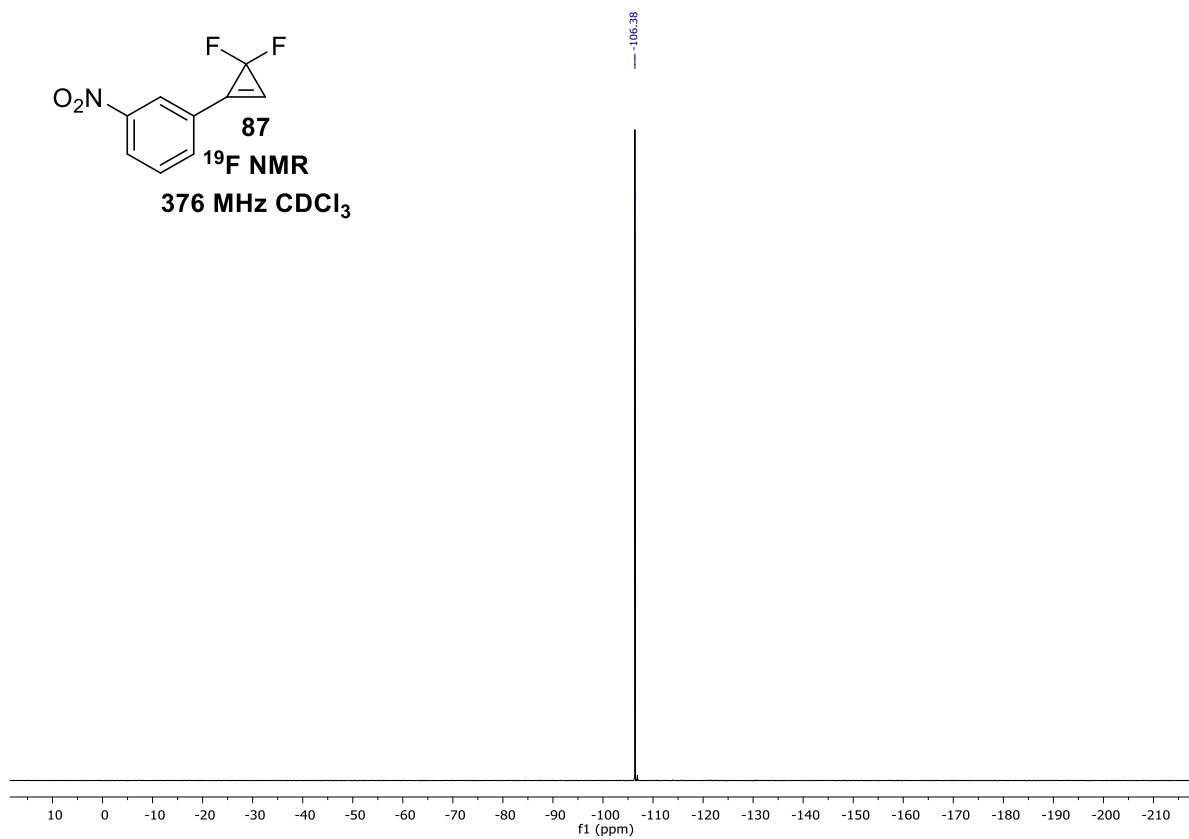

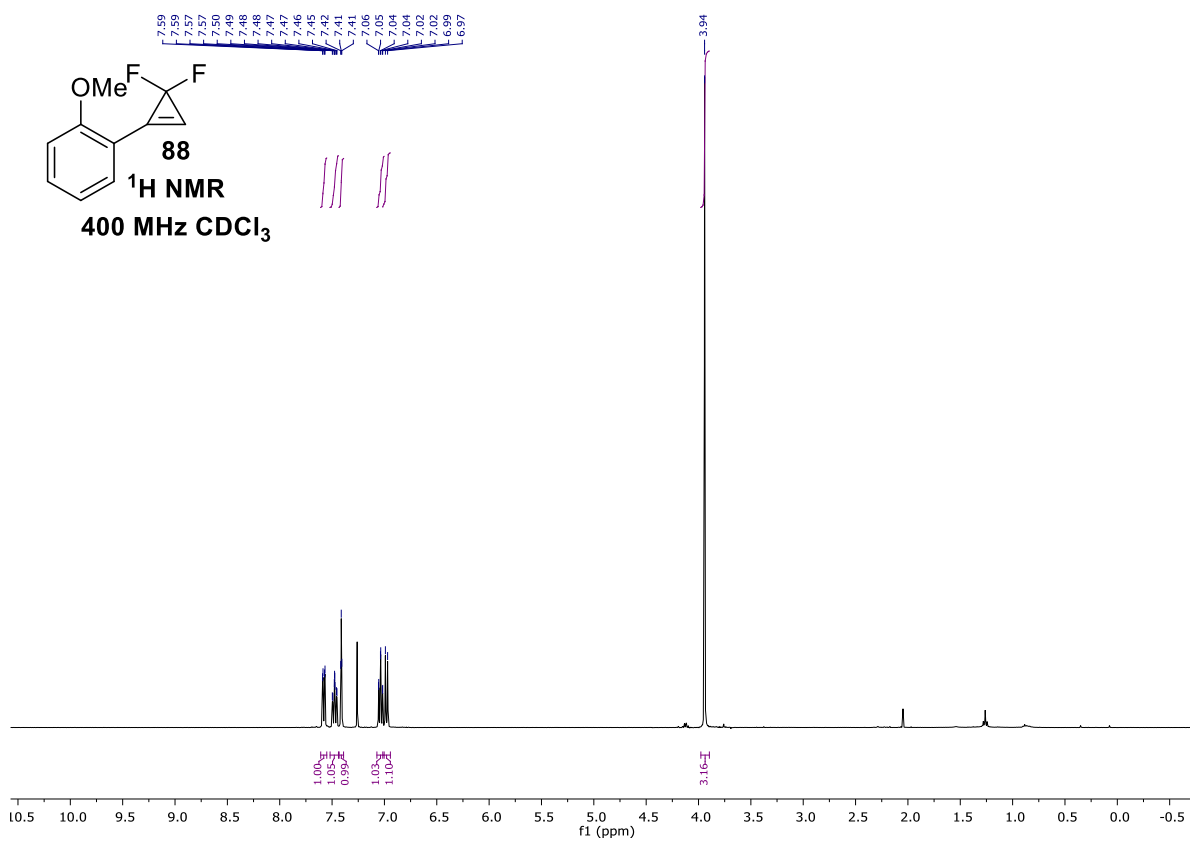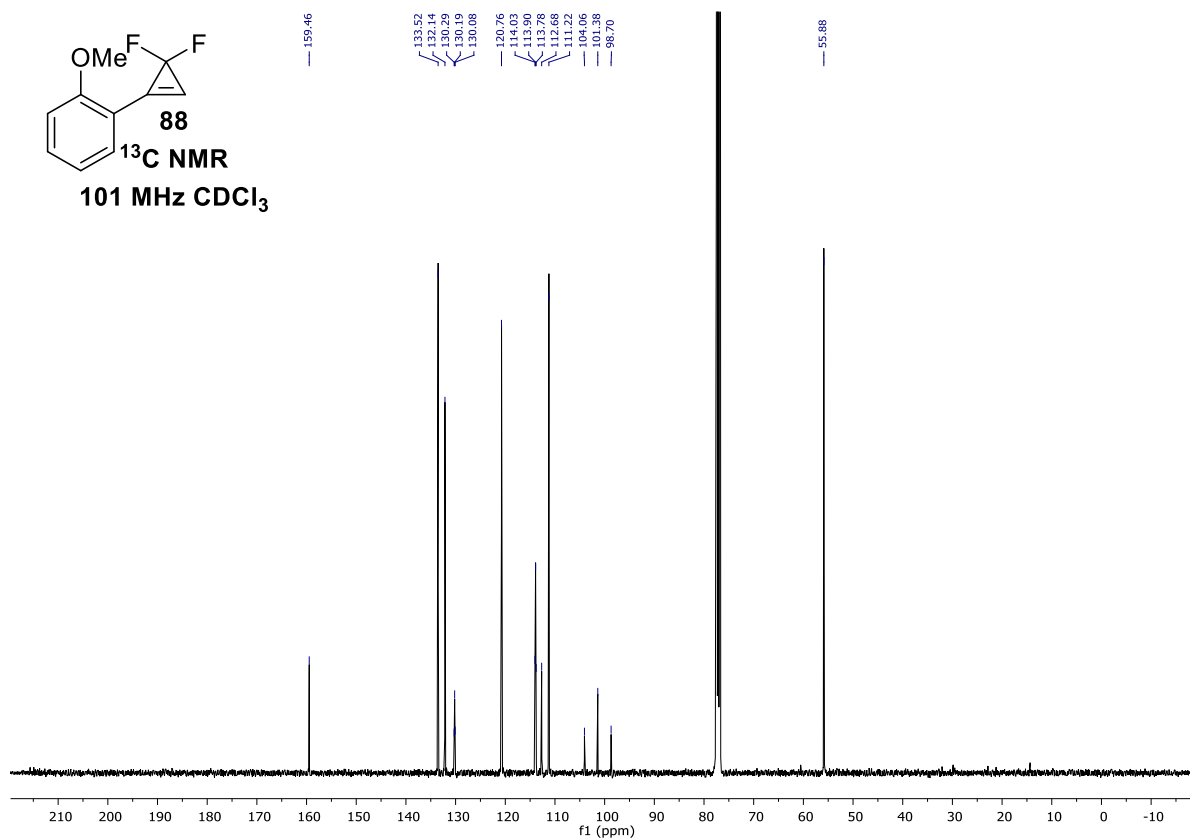

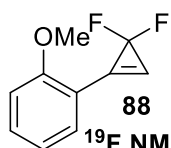

88

$^{19}\text{F}$  NMR

376 MHz  $\text{CDCl}_3$

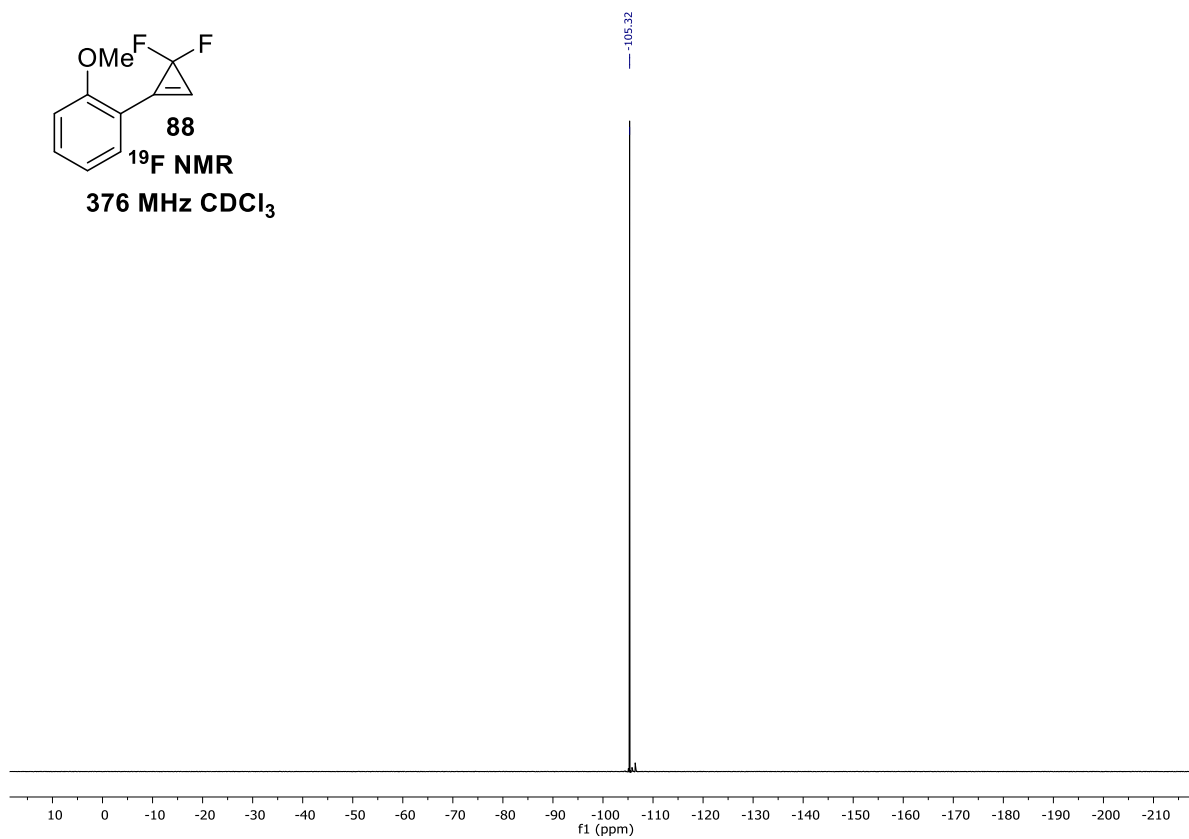

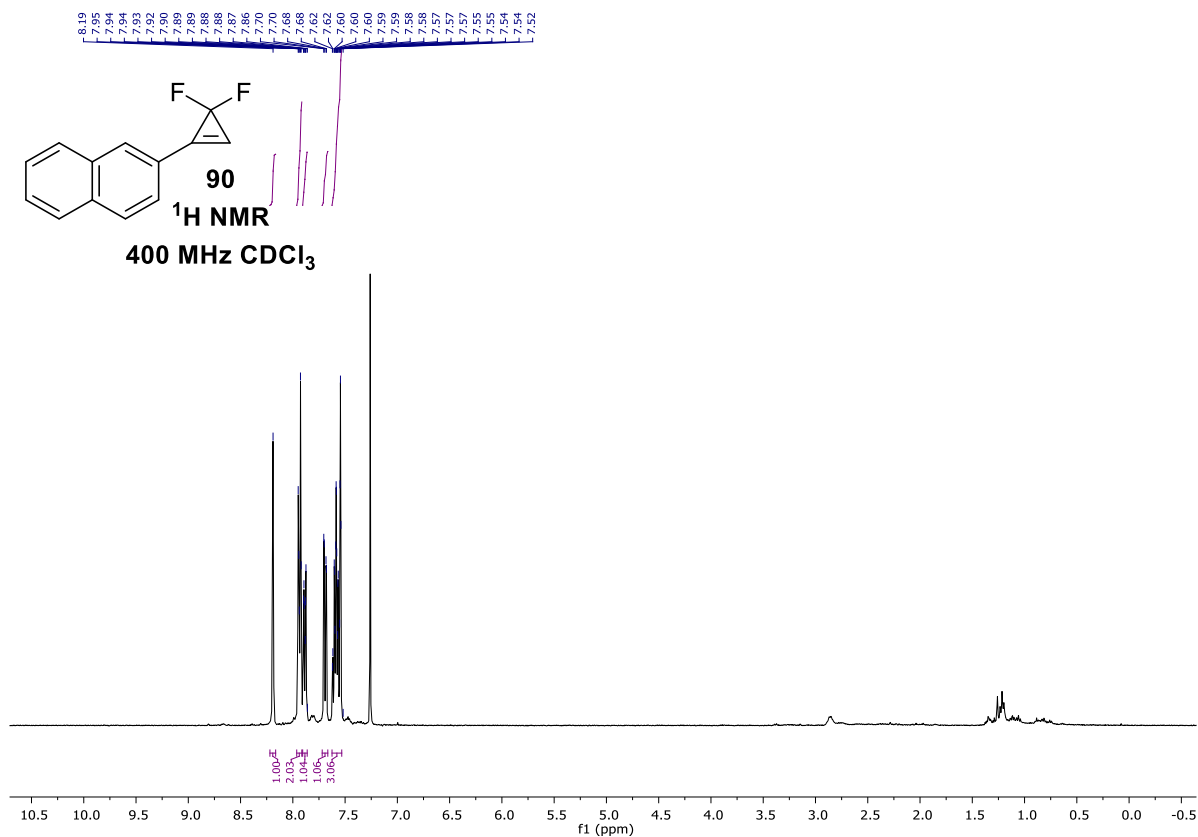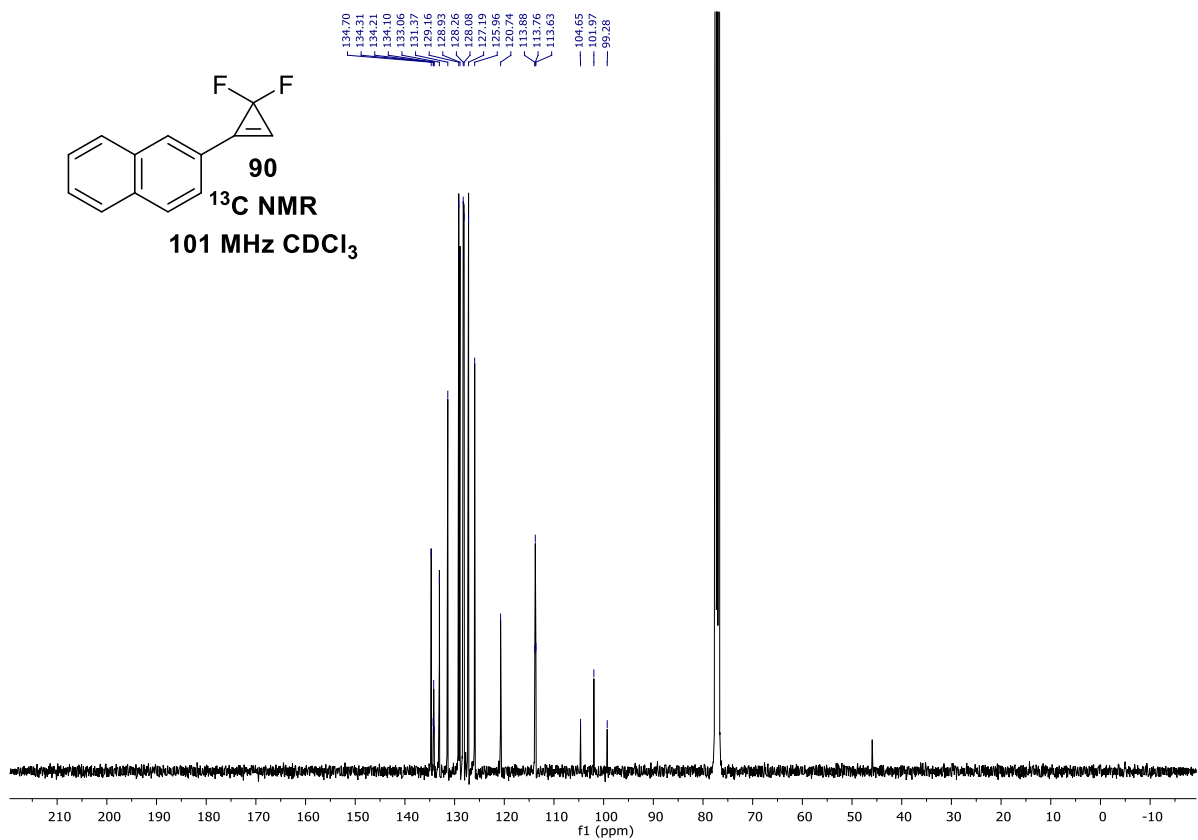

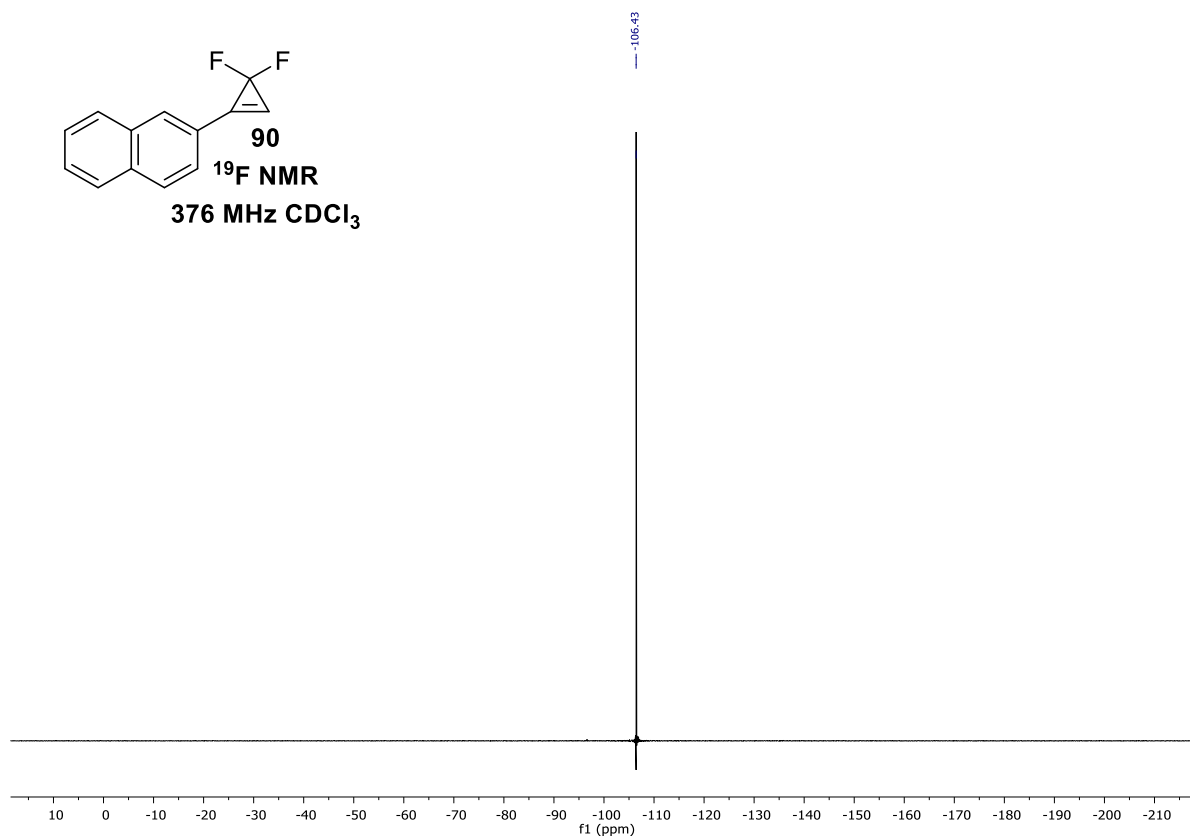

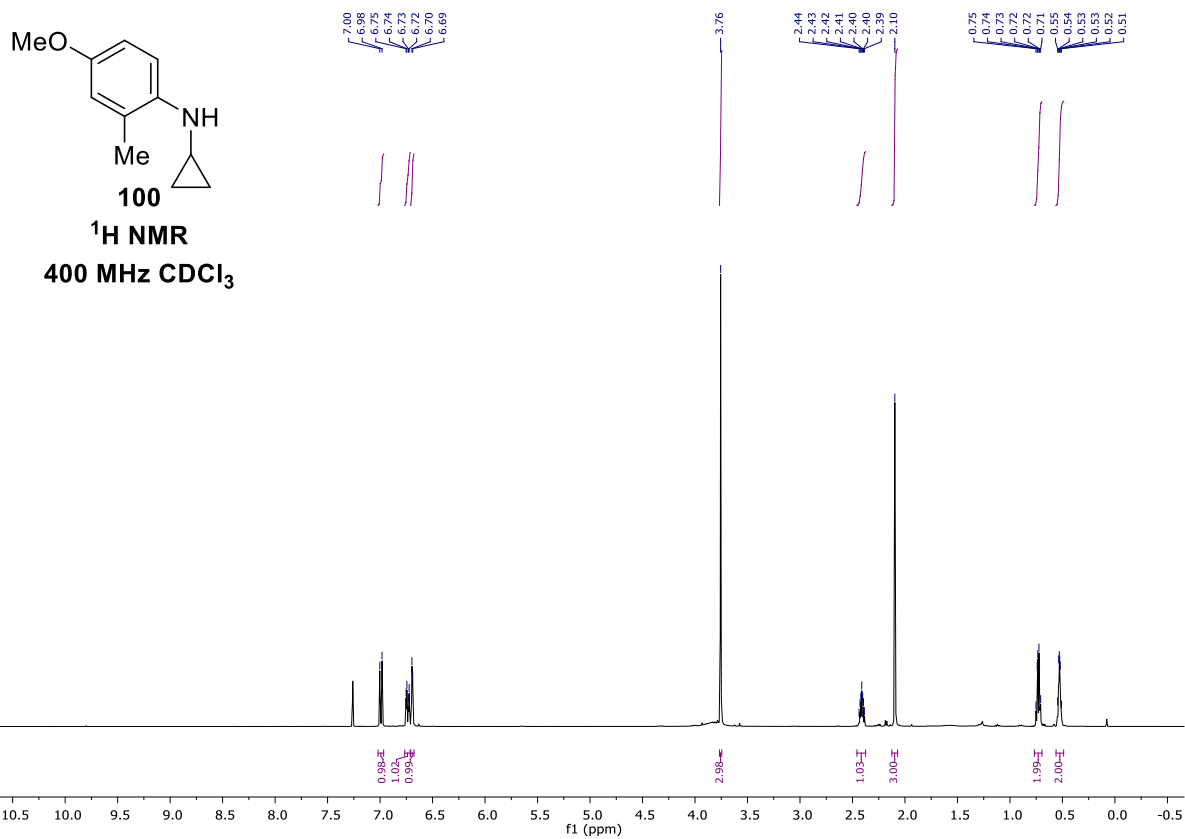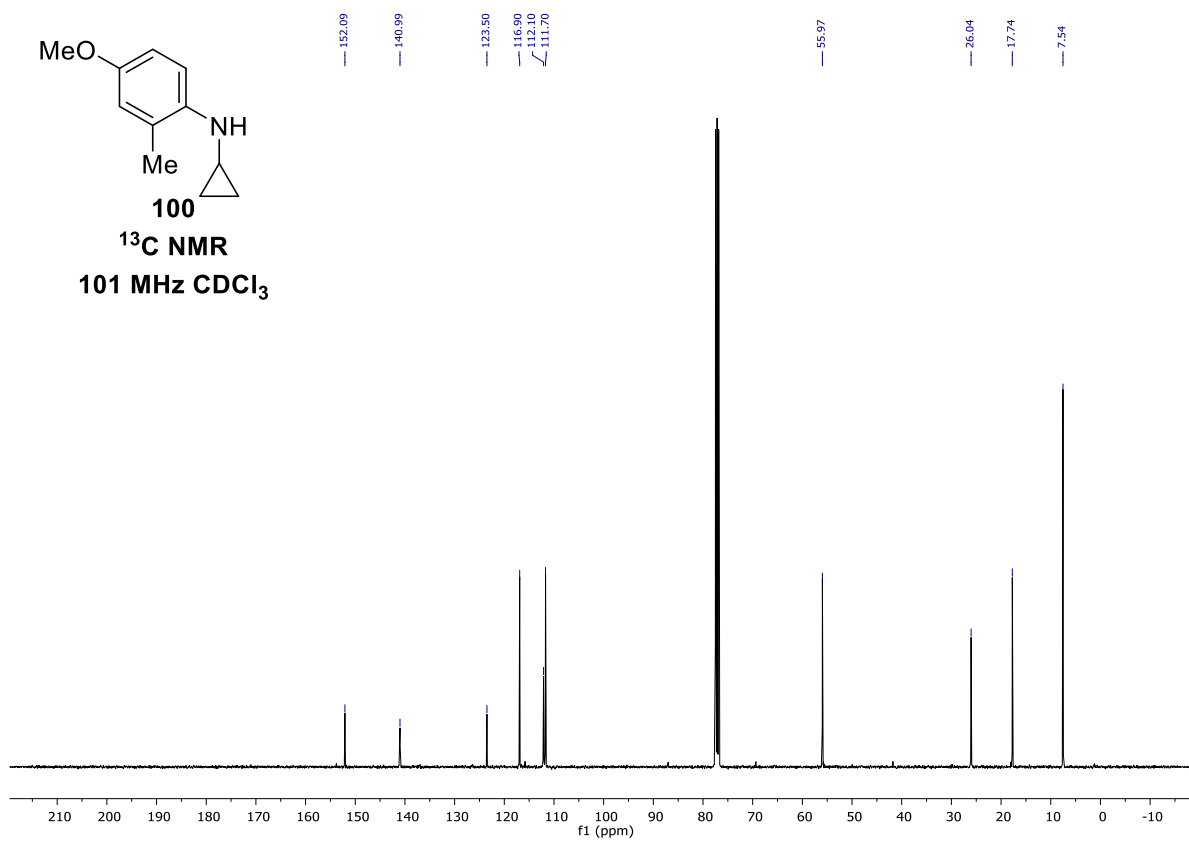



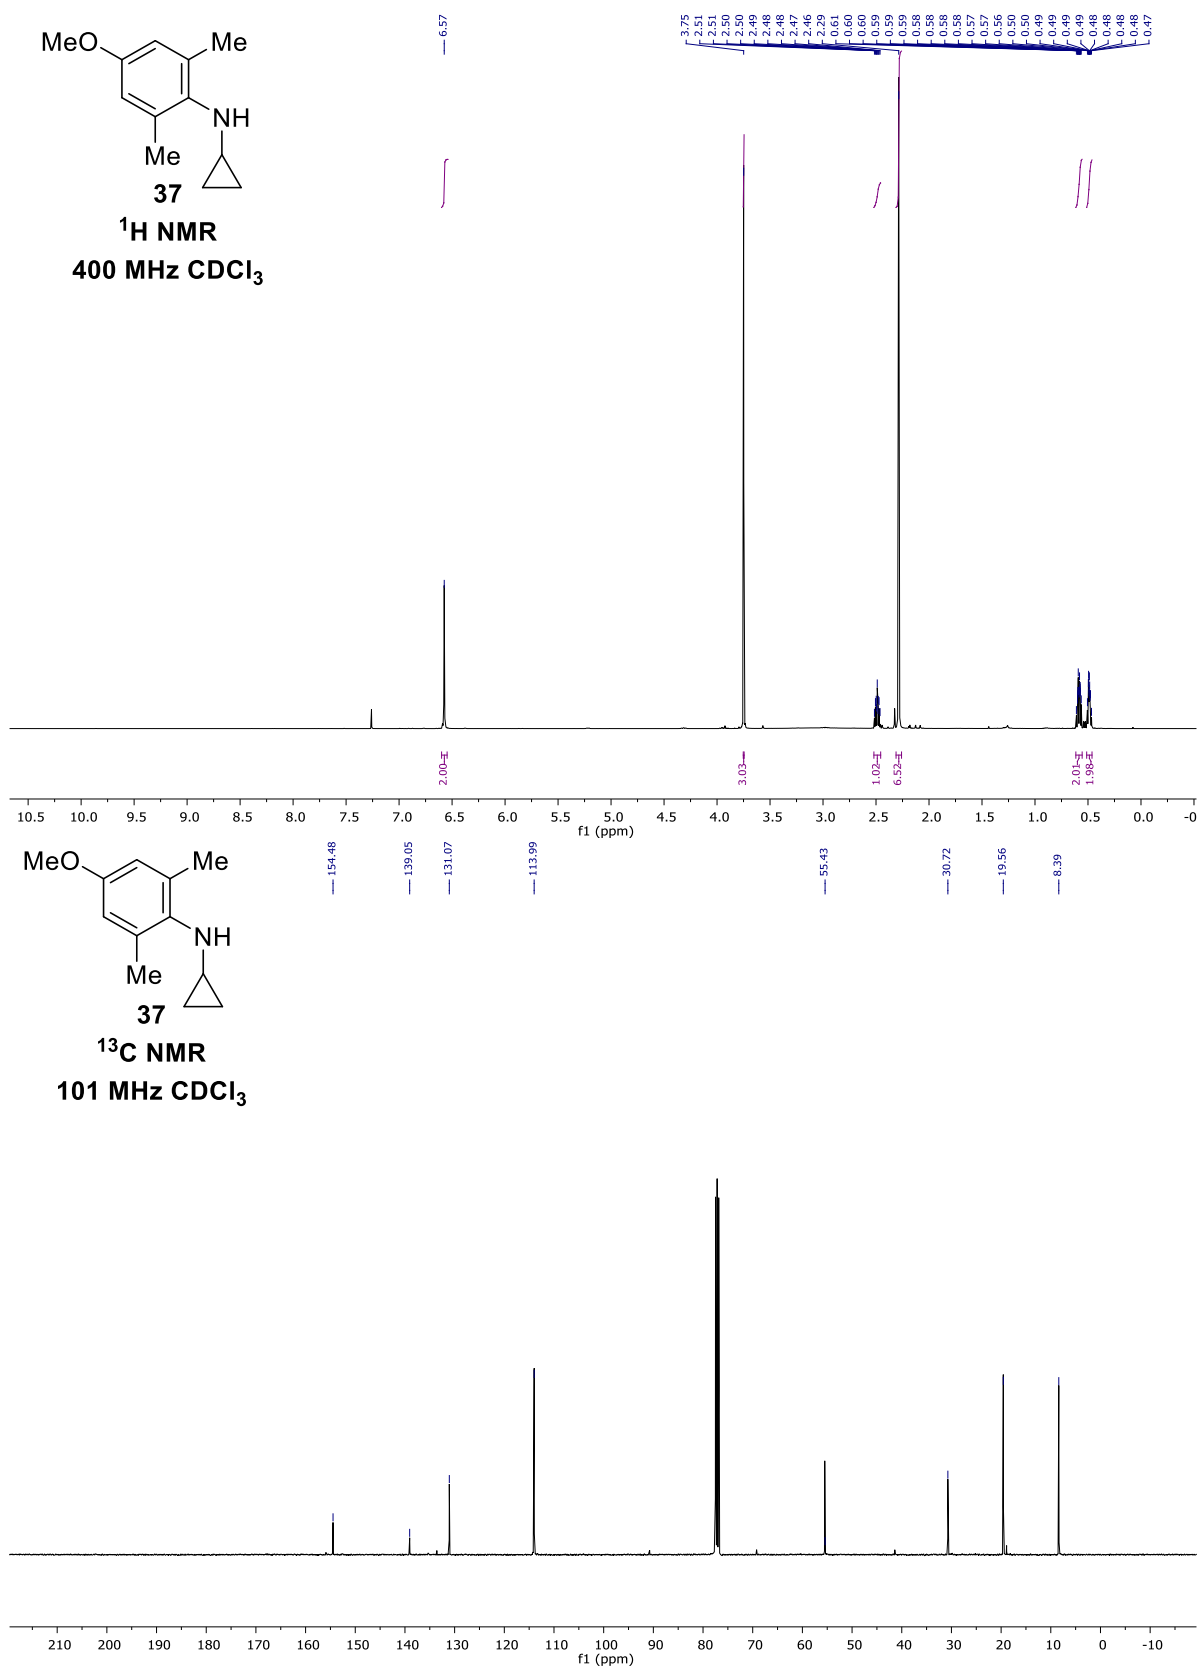

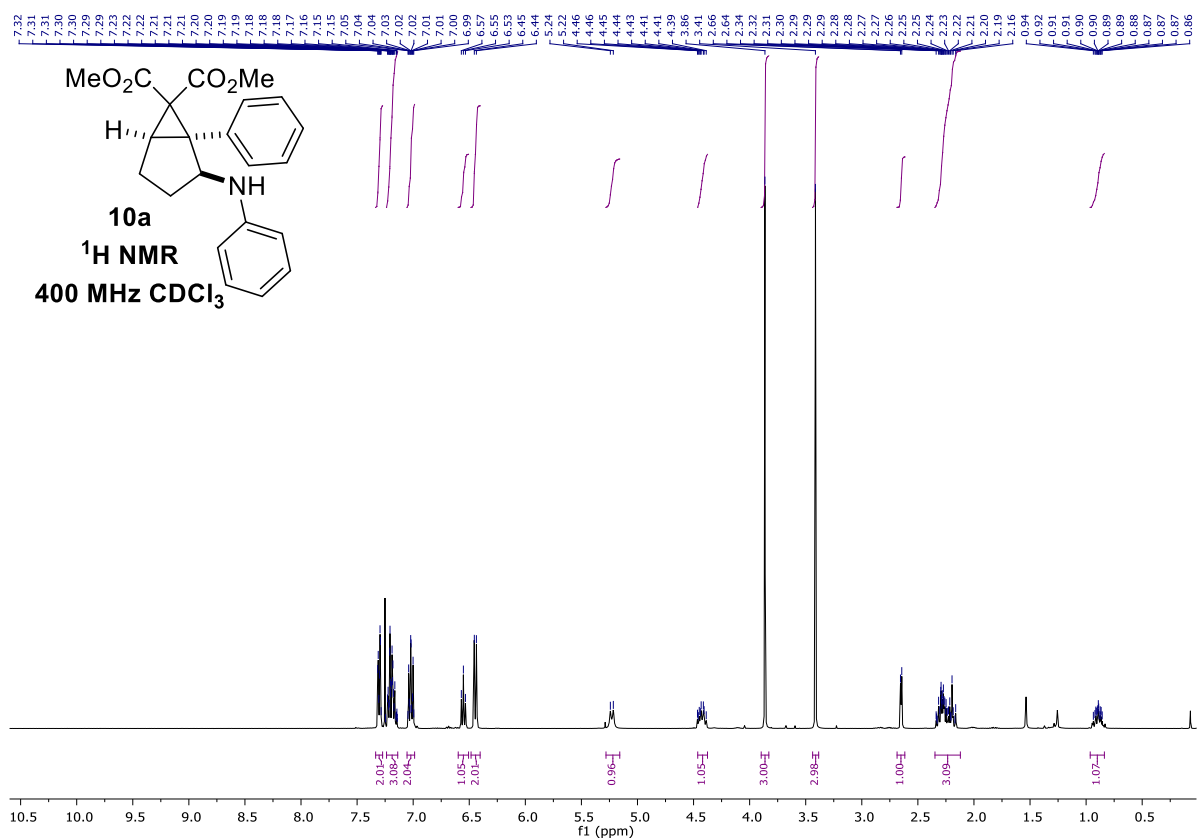

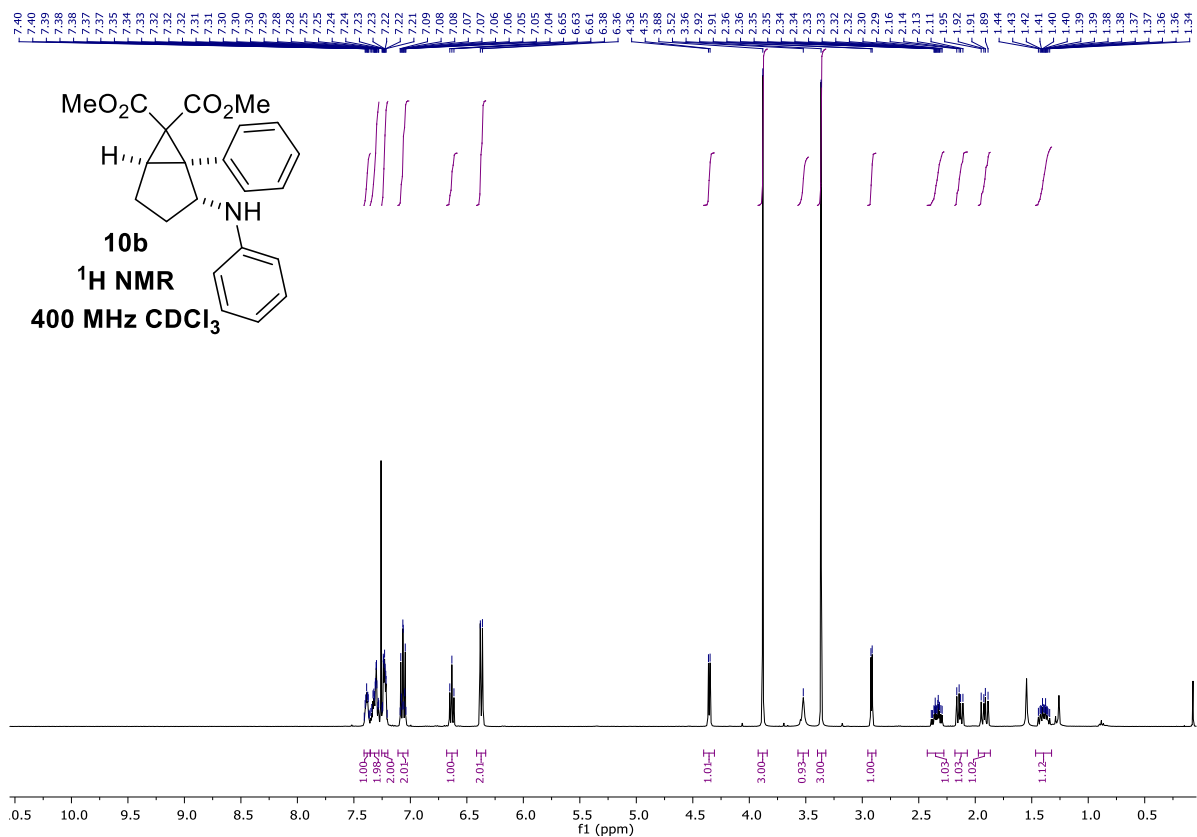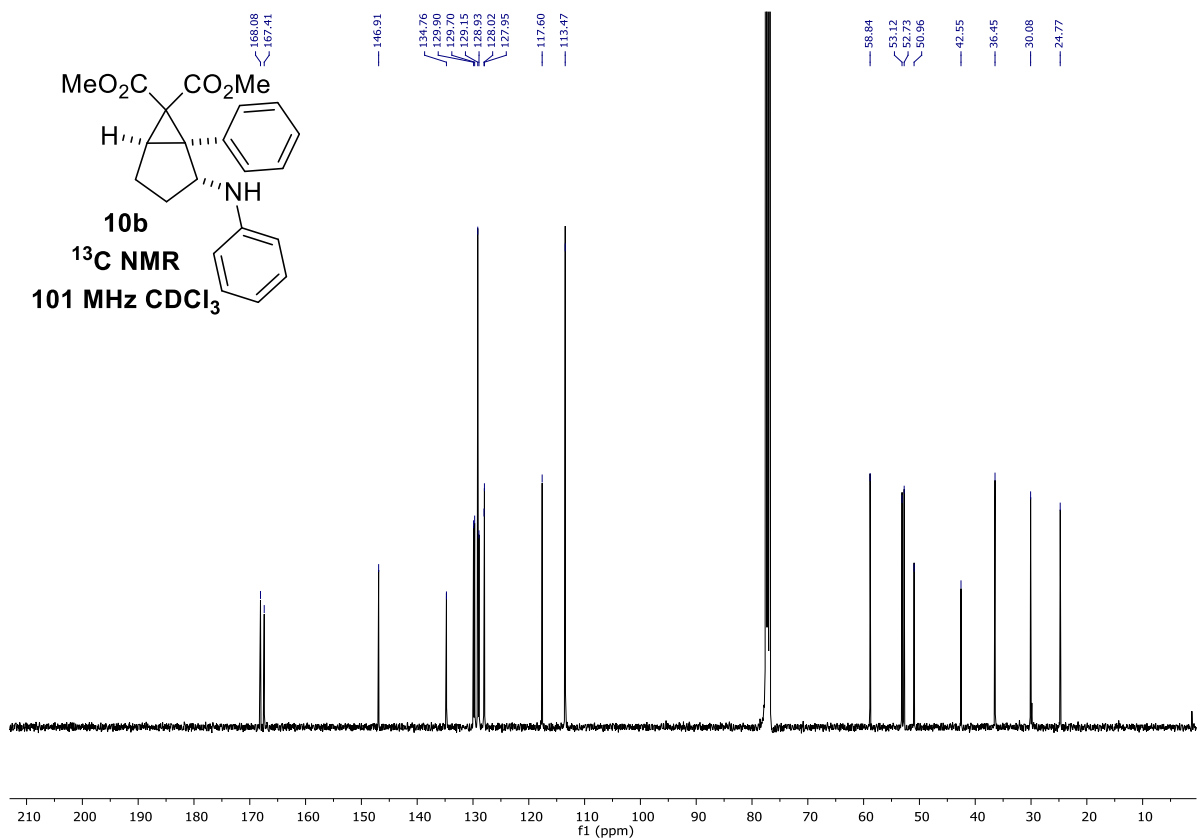

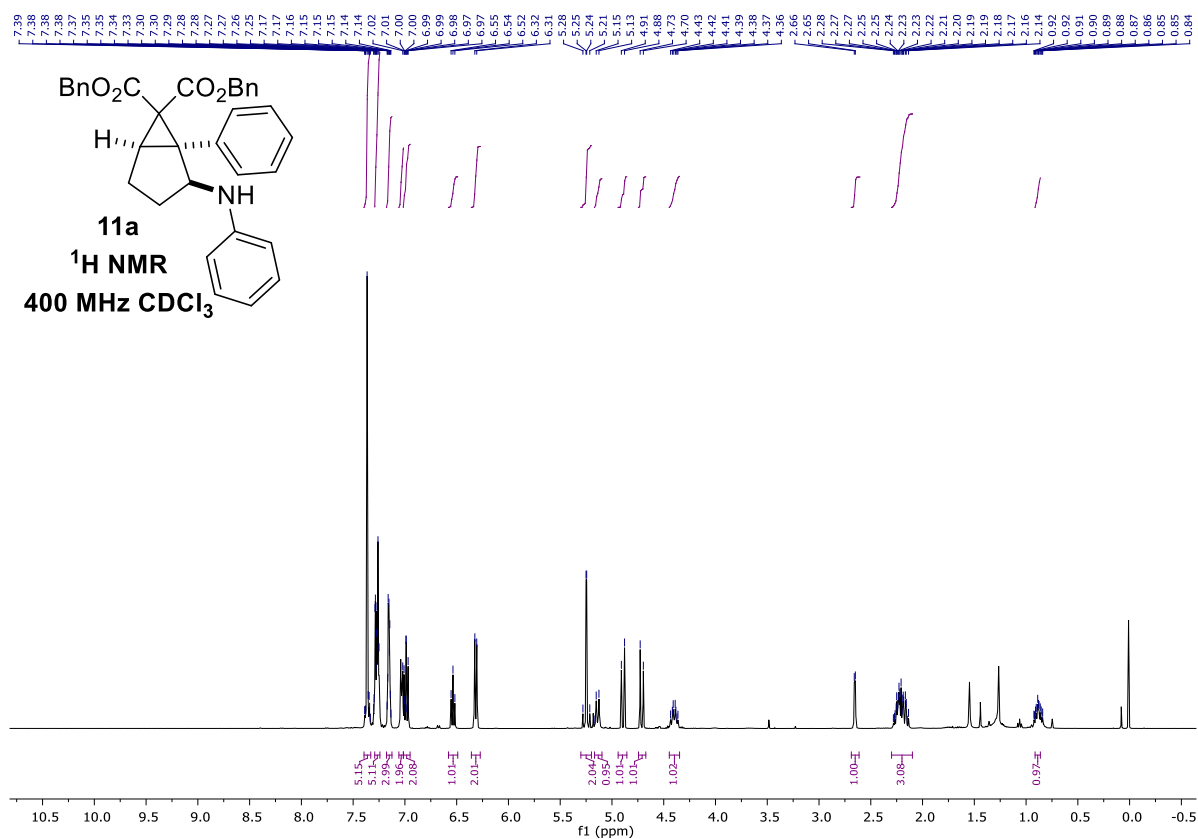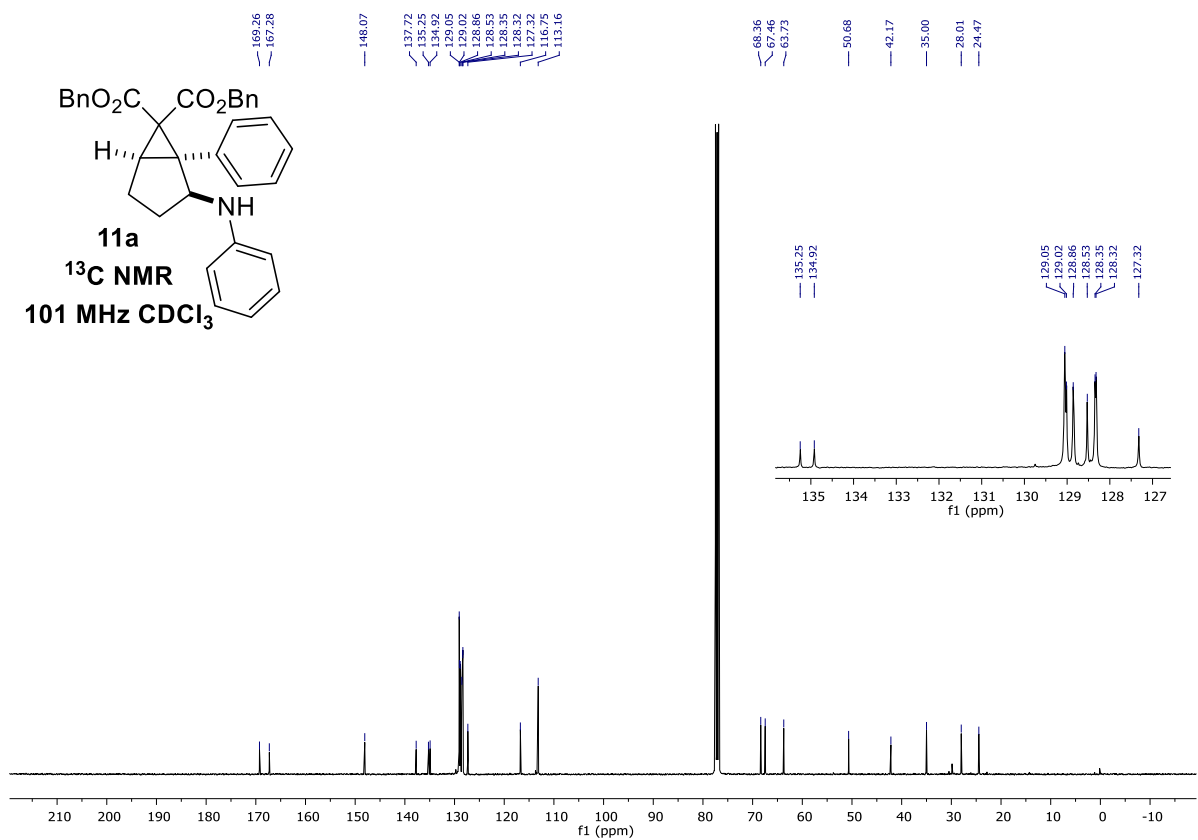

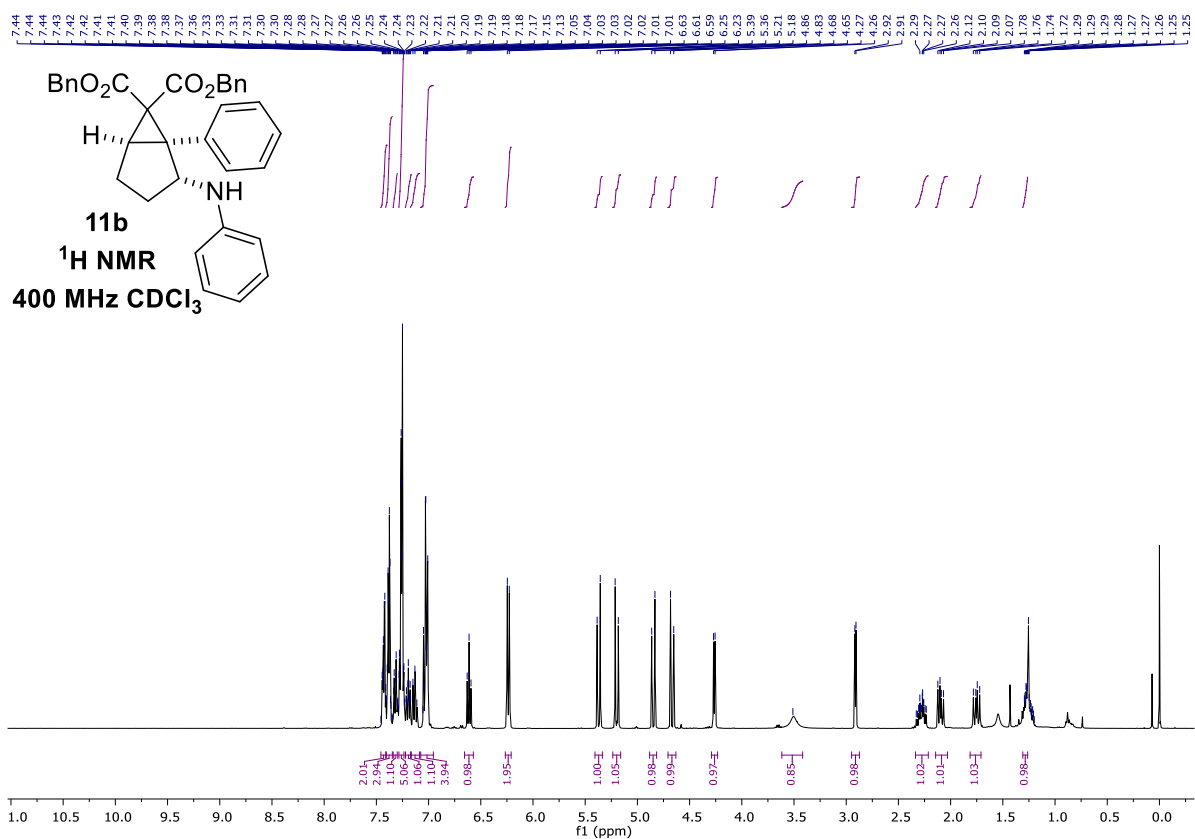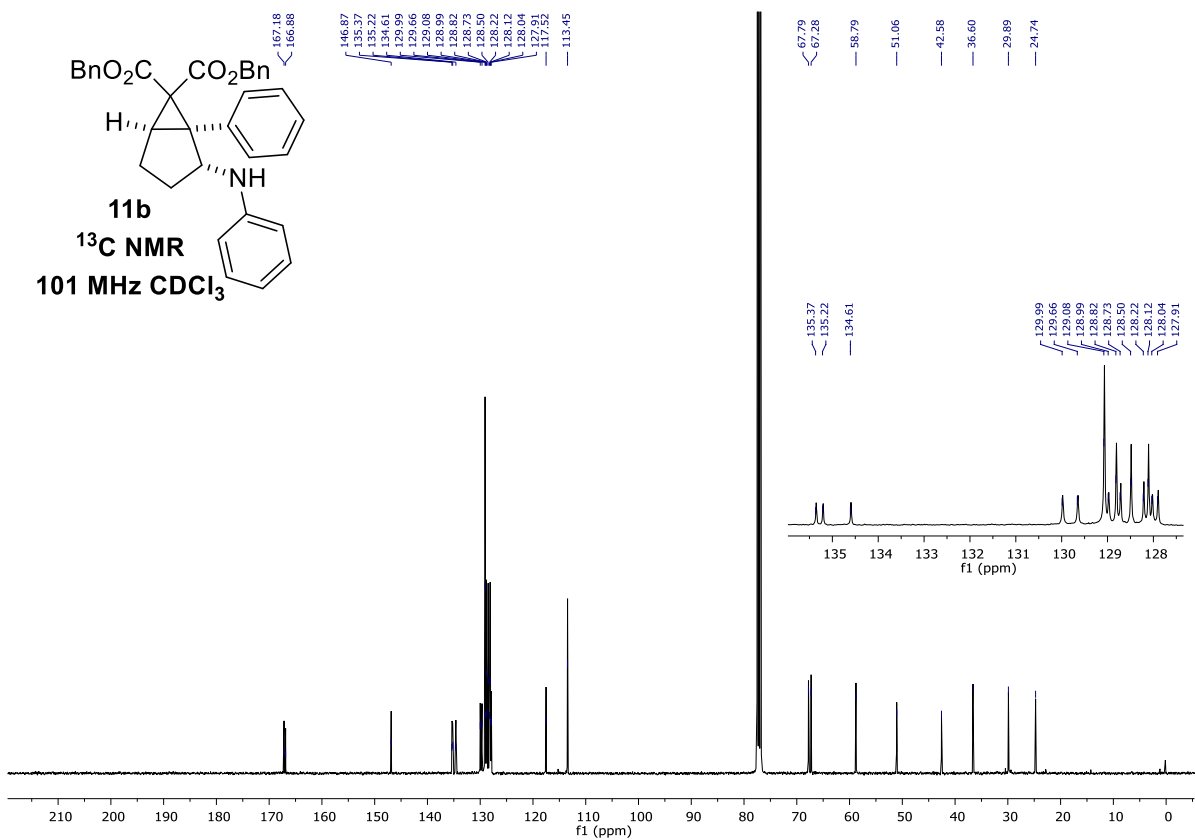

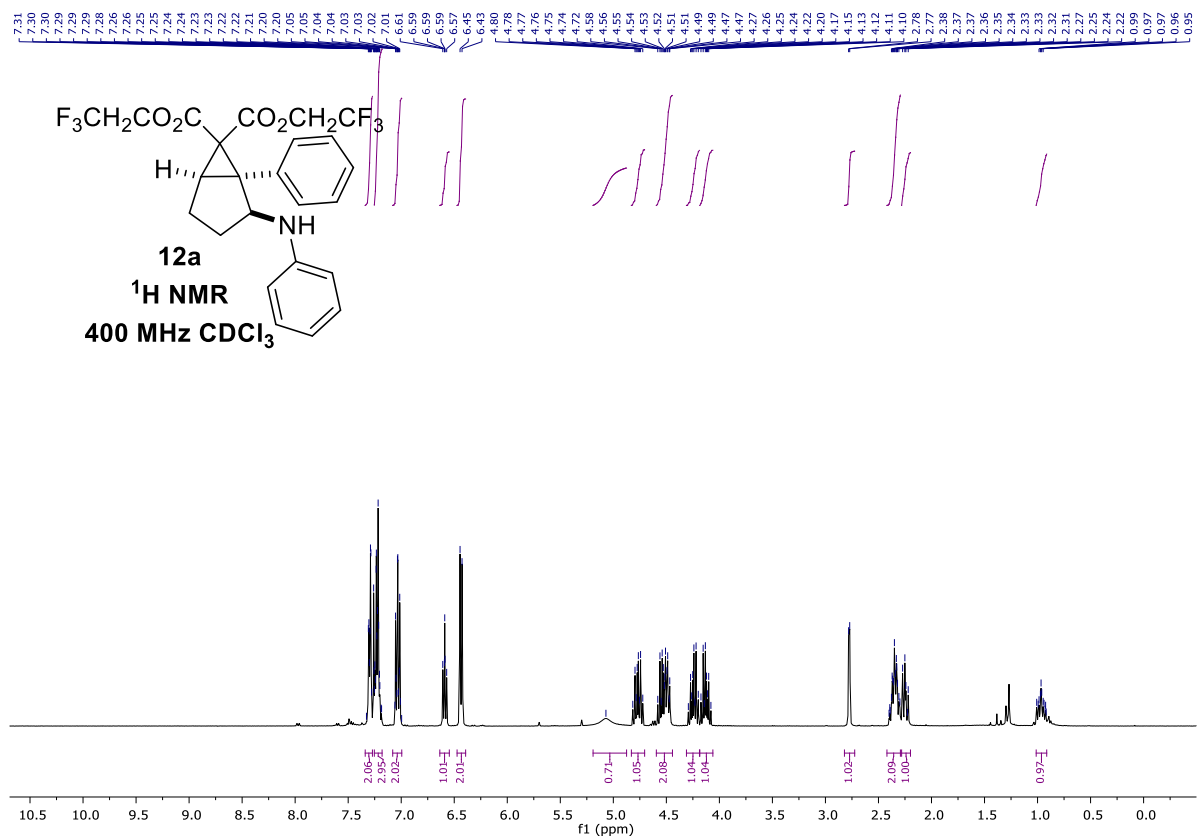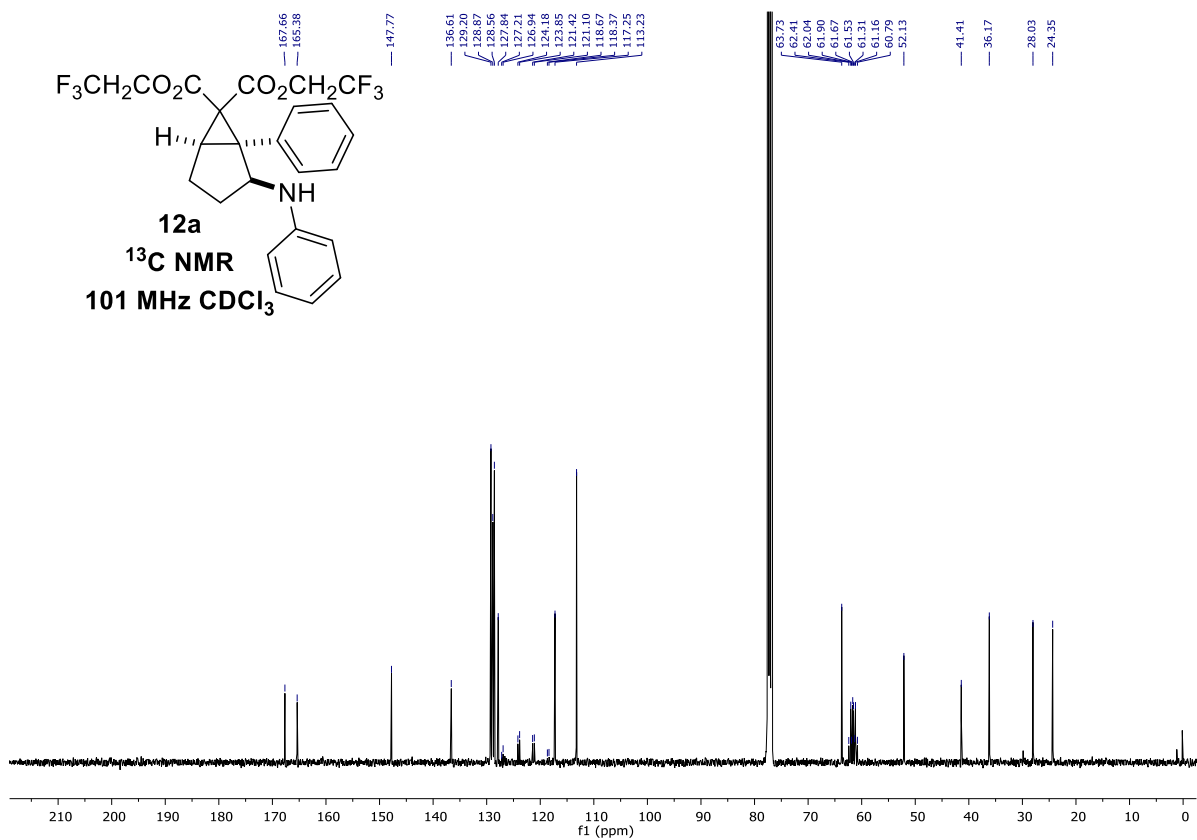

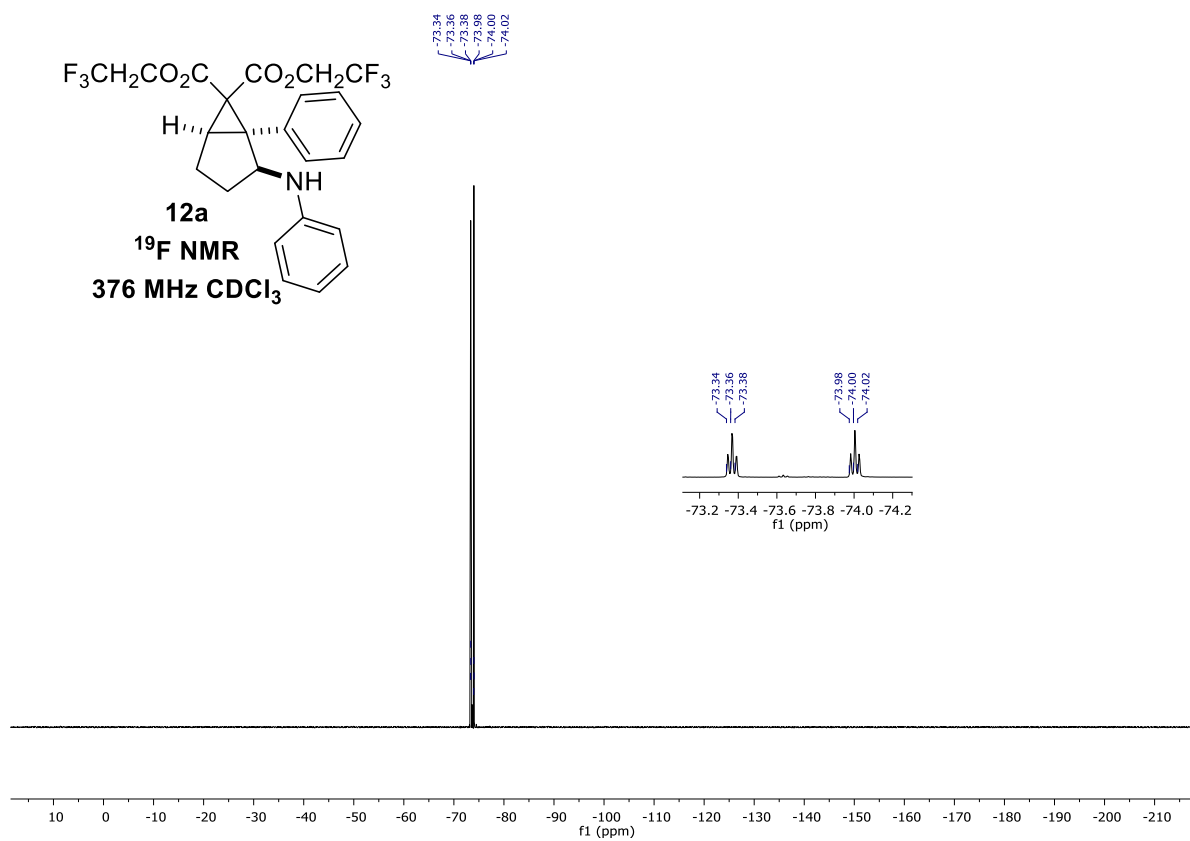





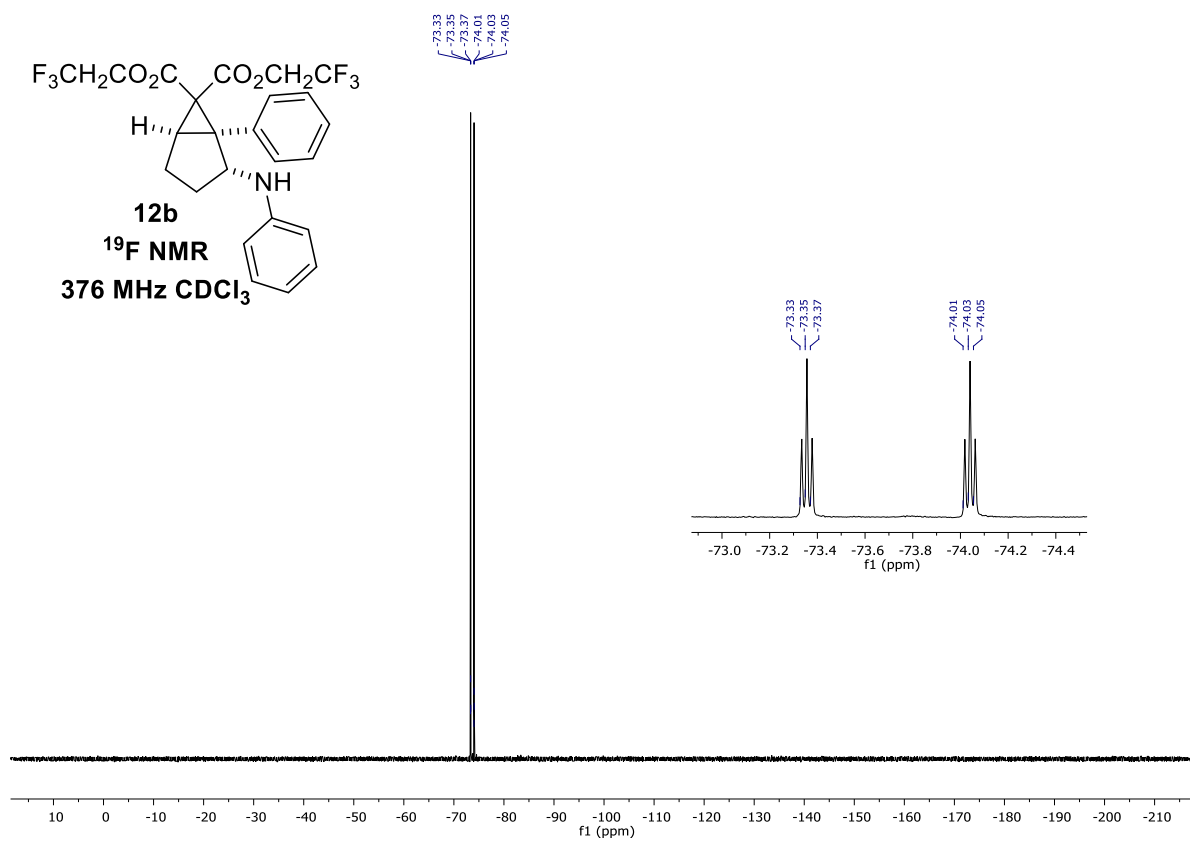

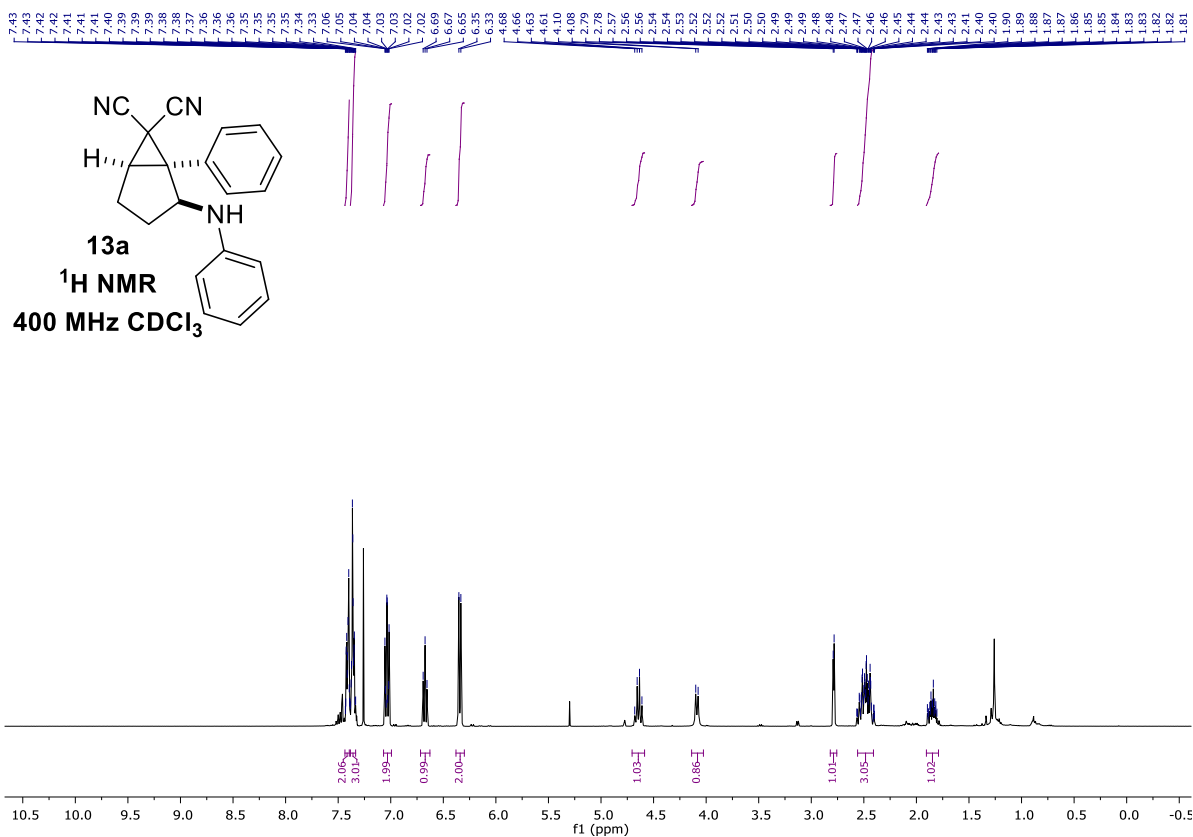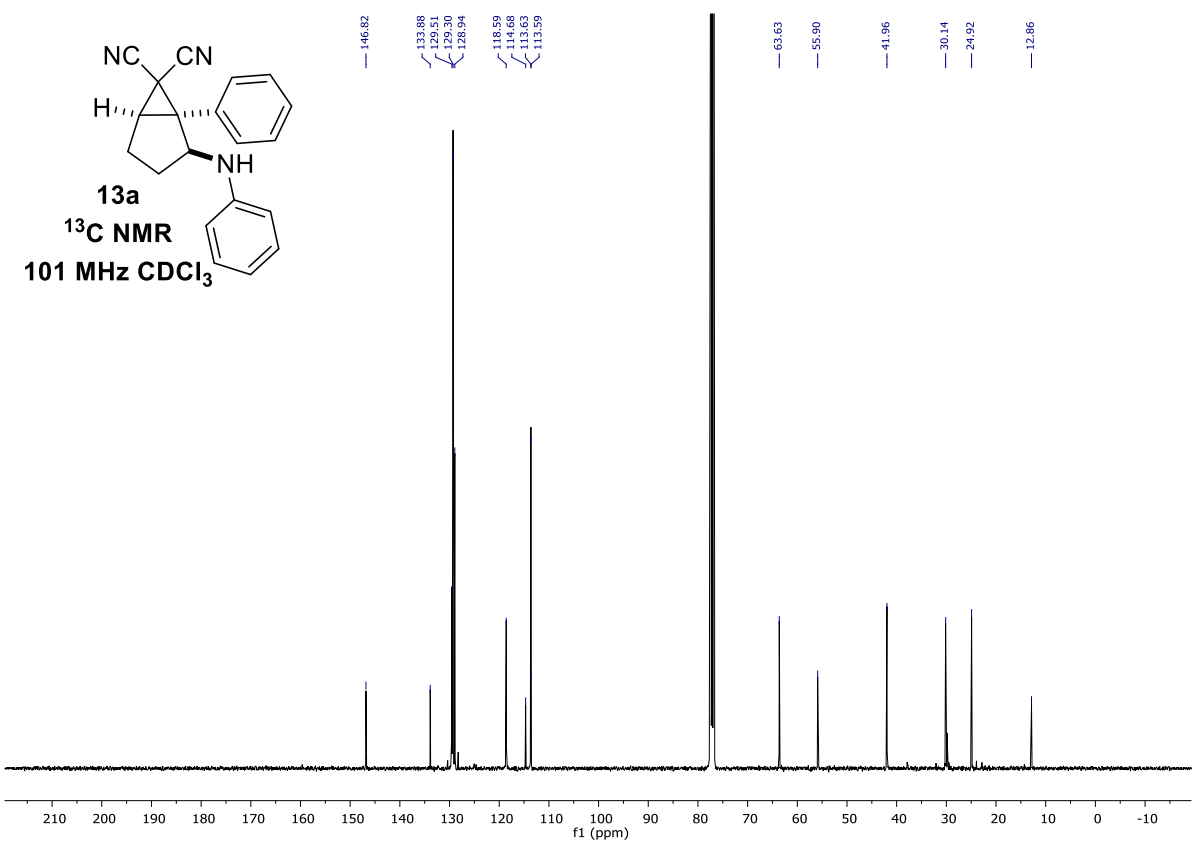

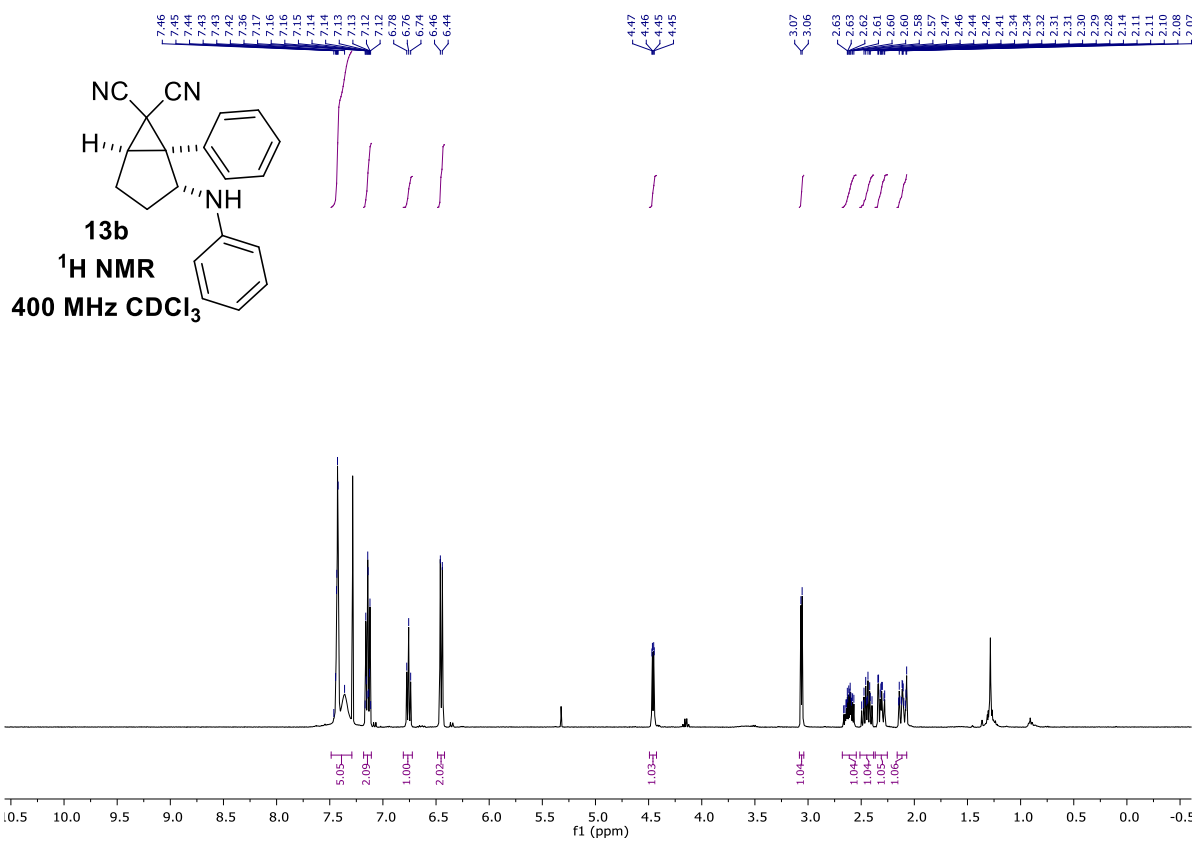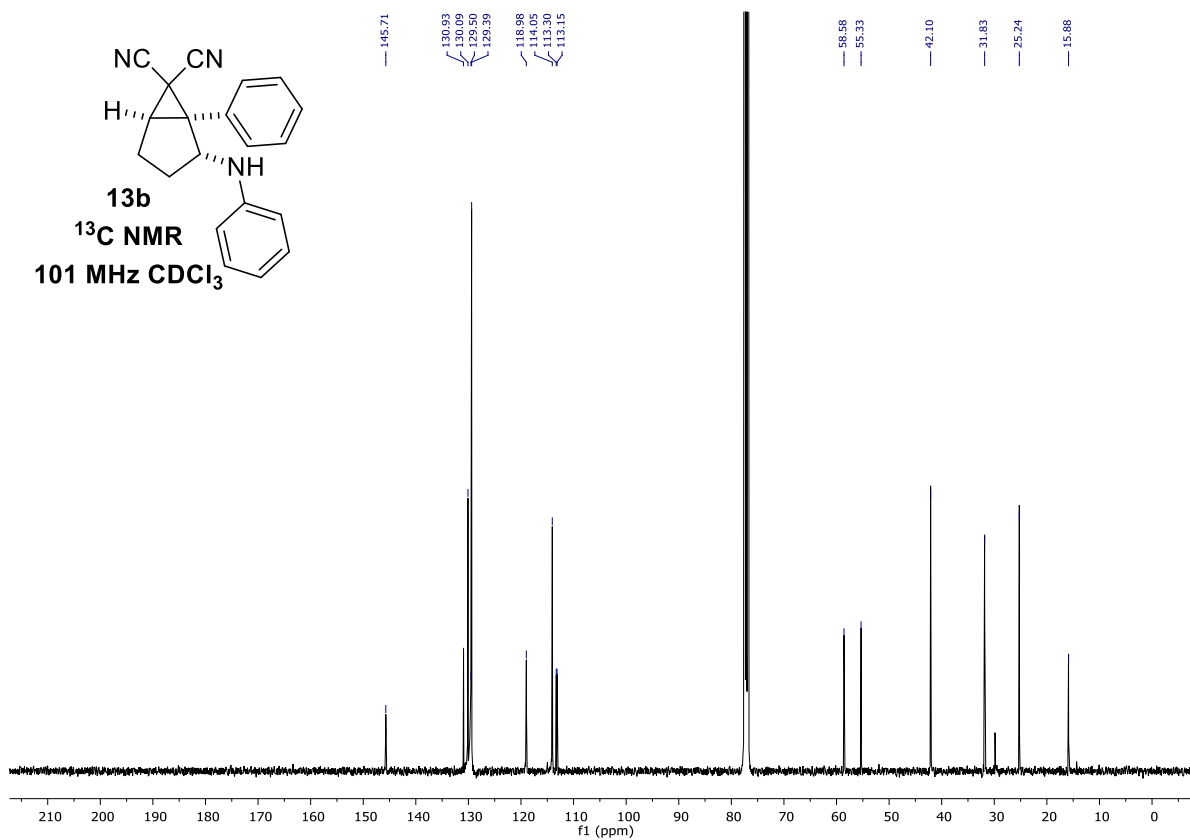



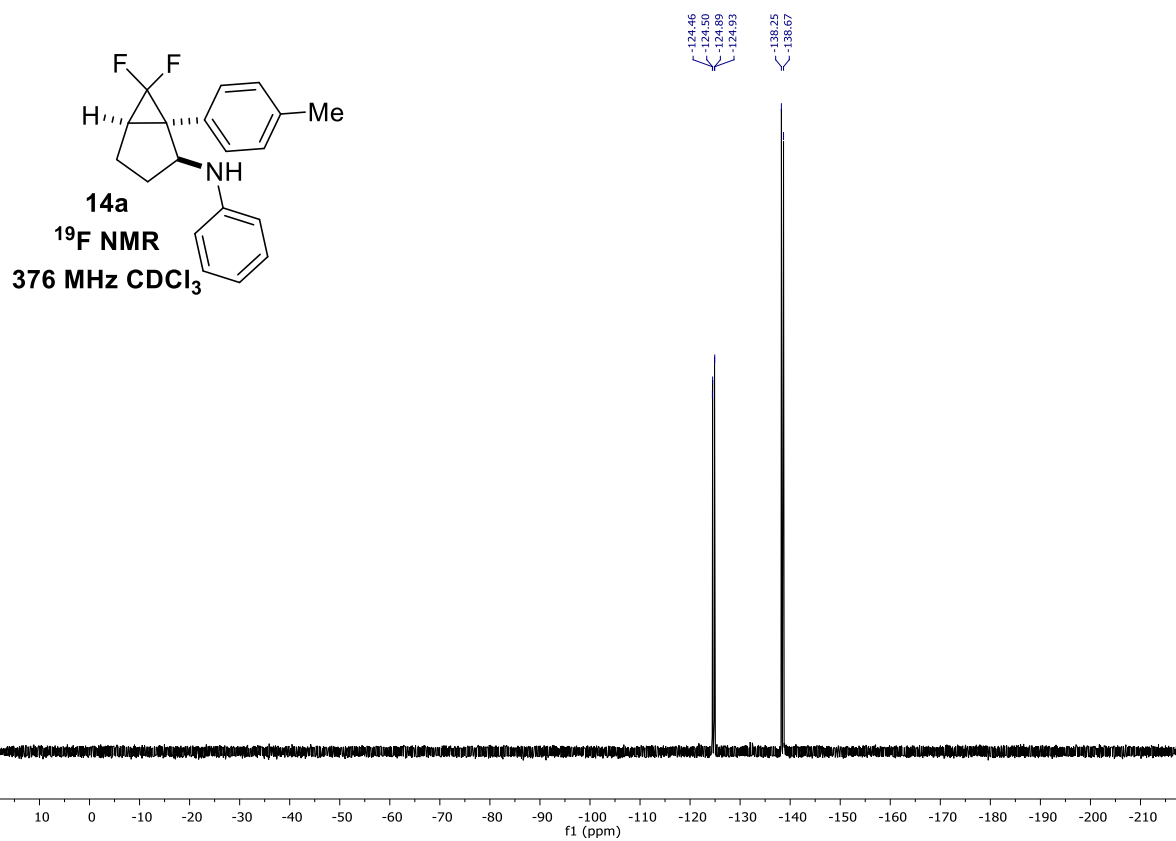

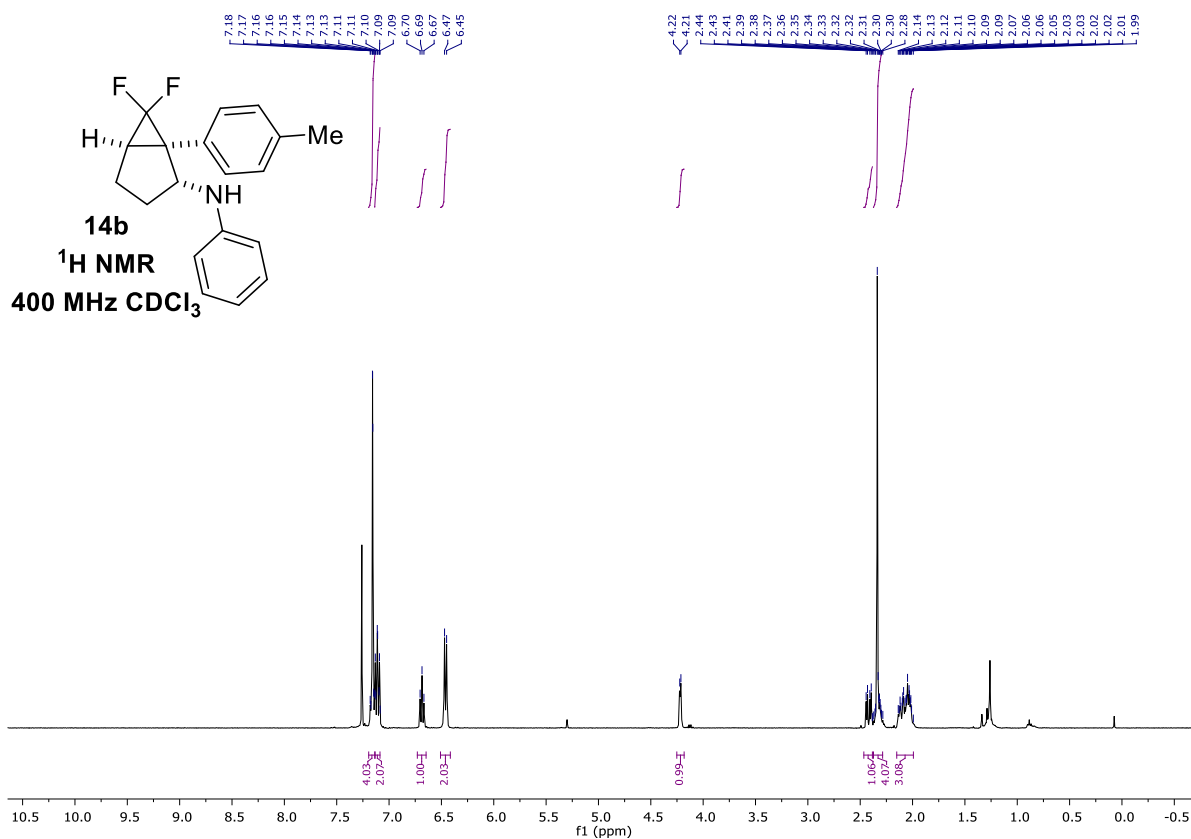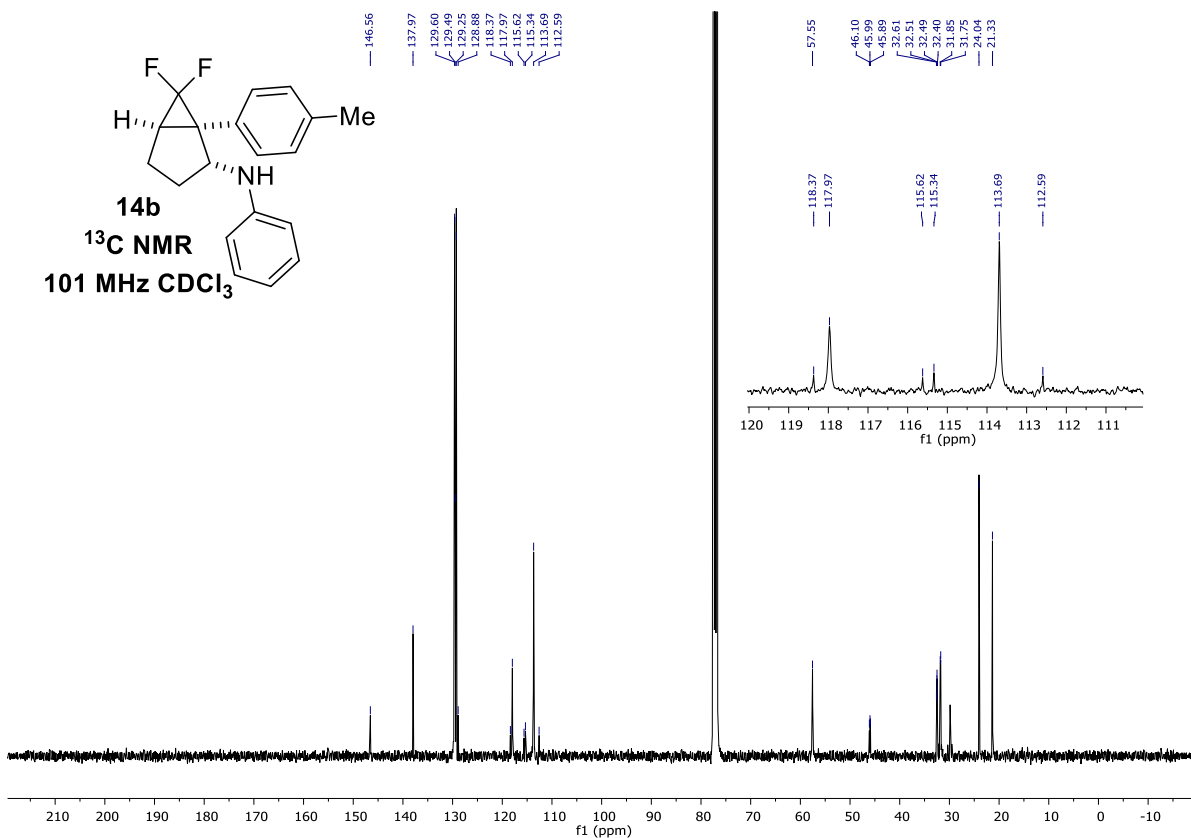

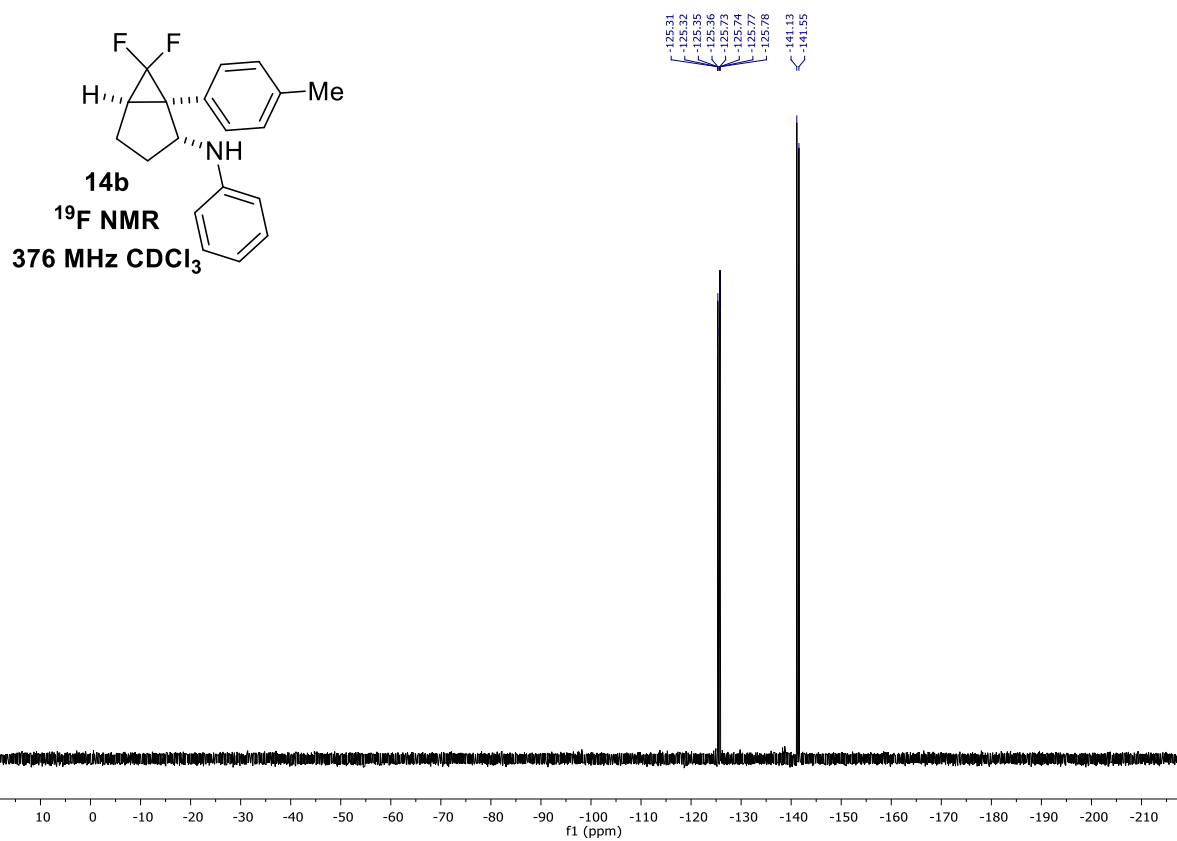

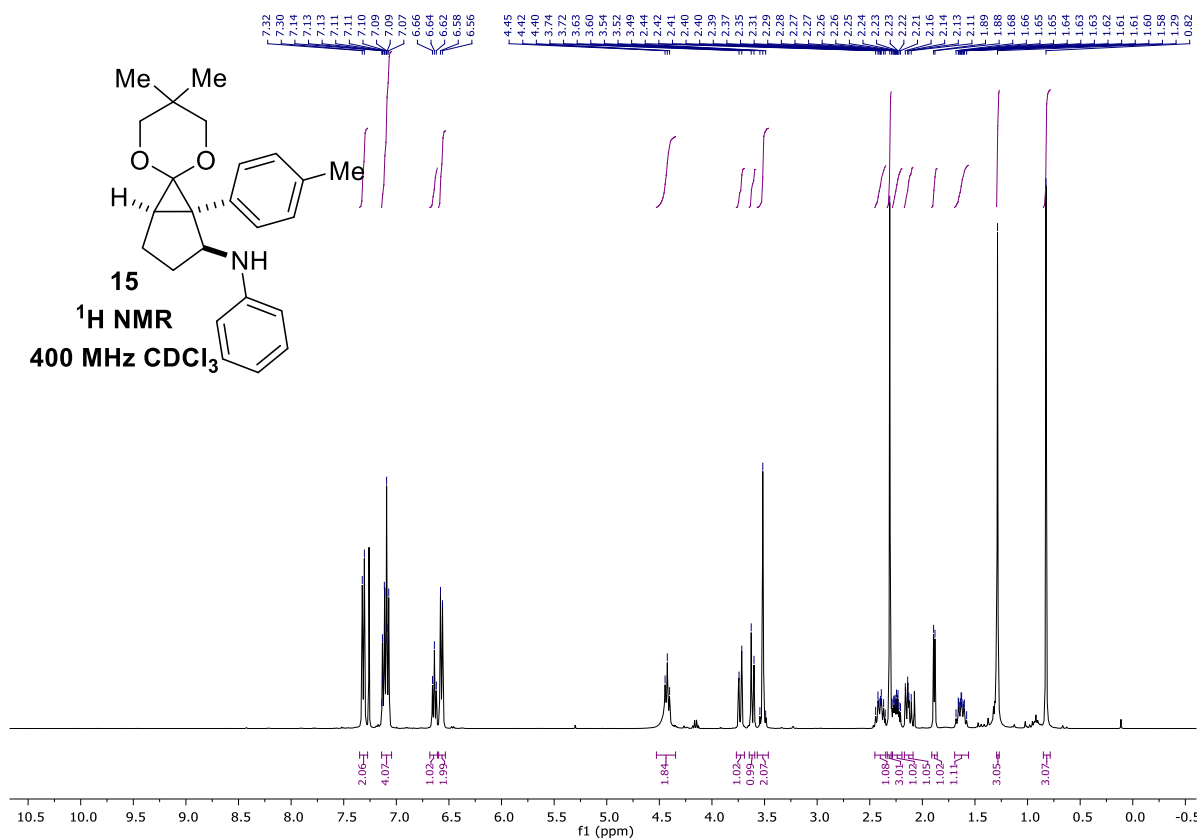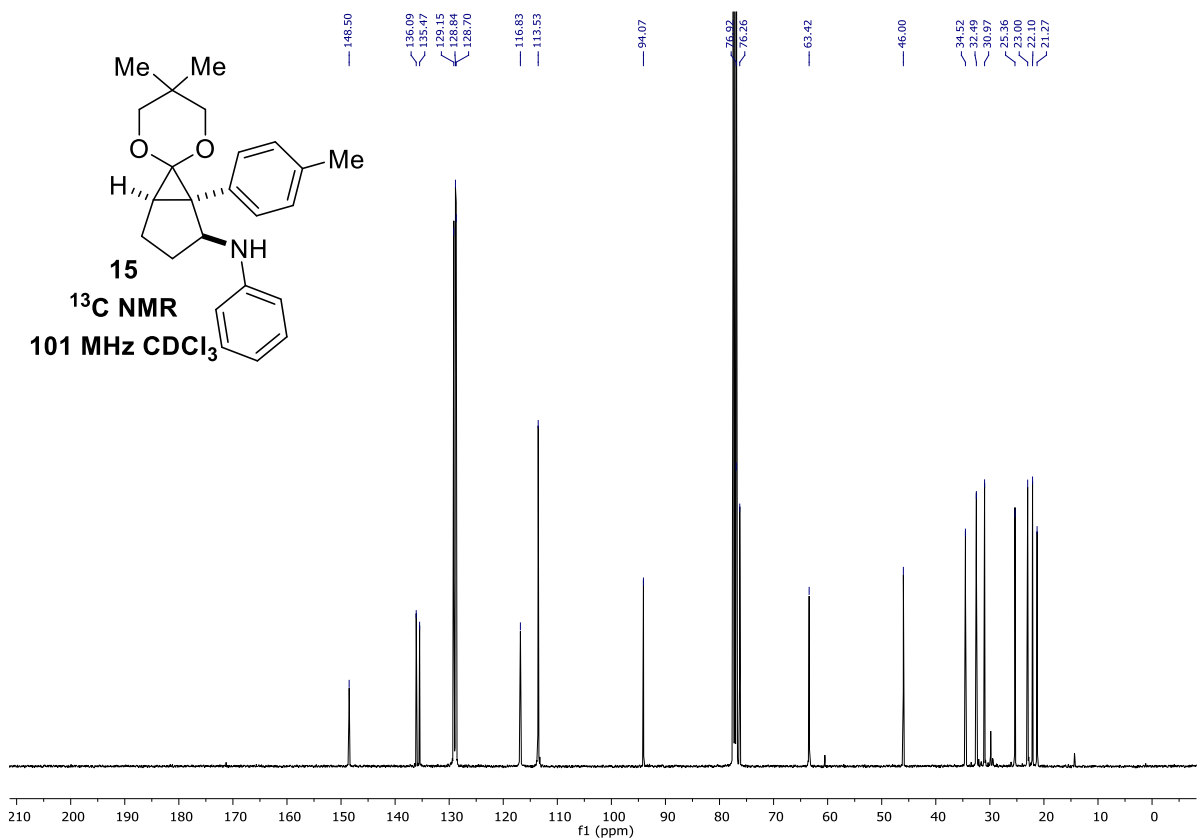



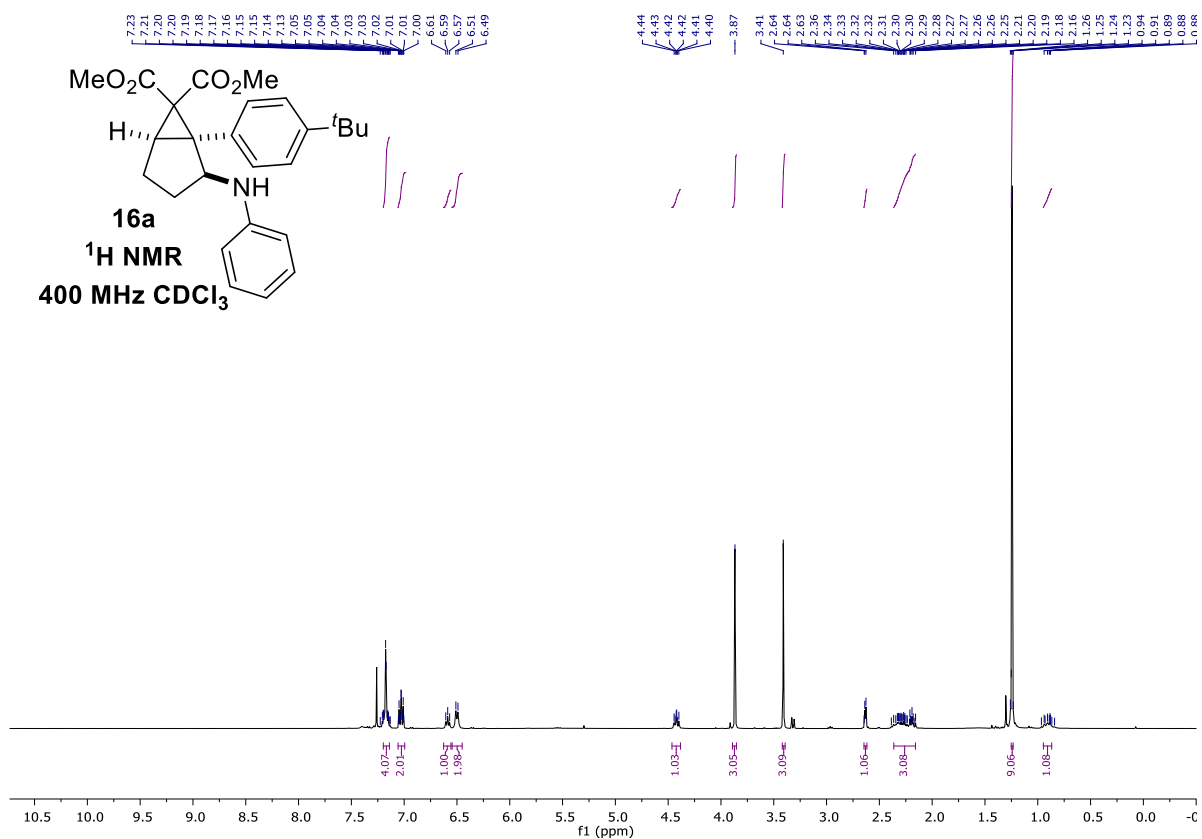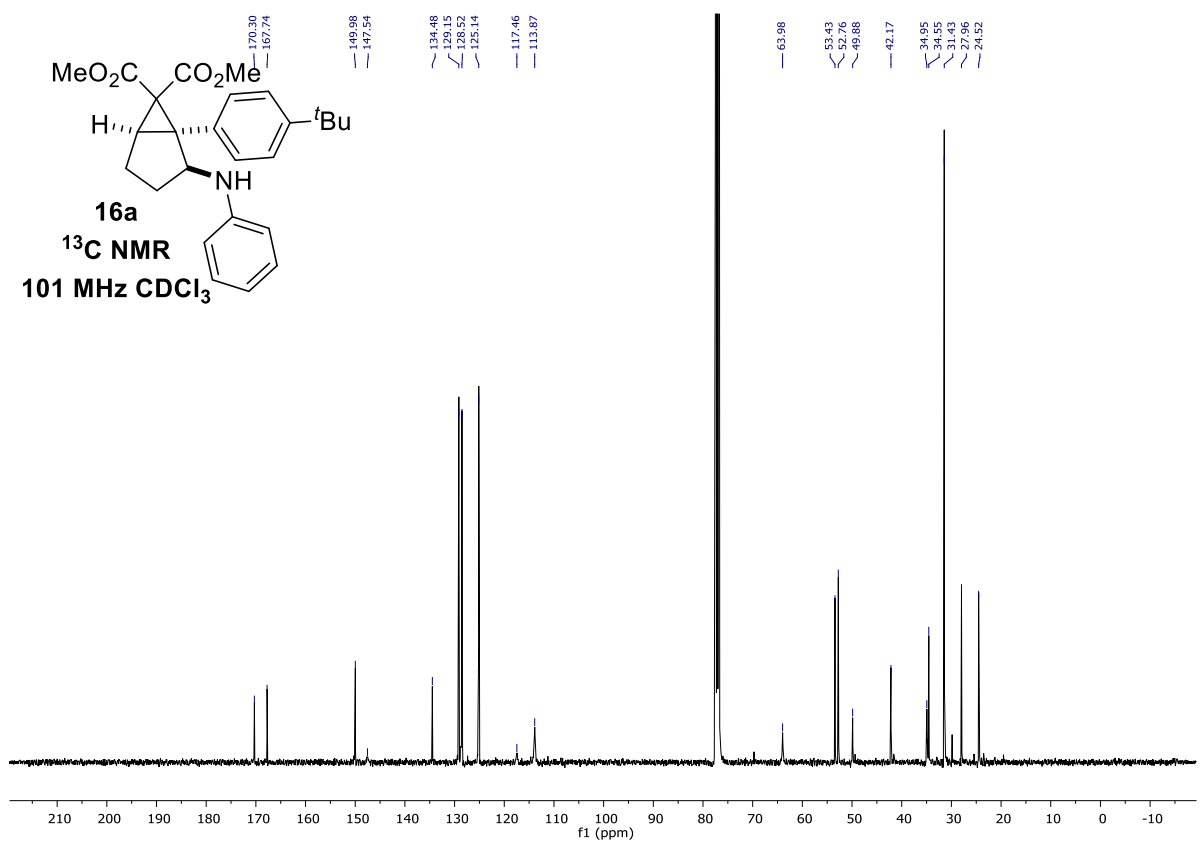

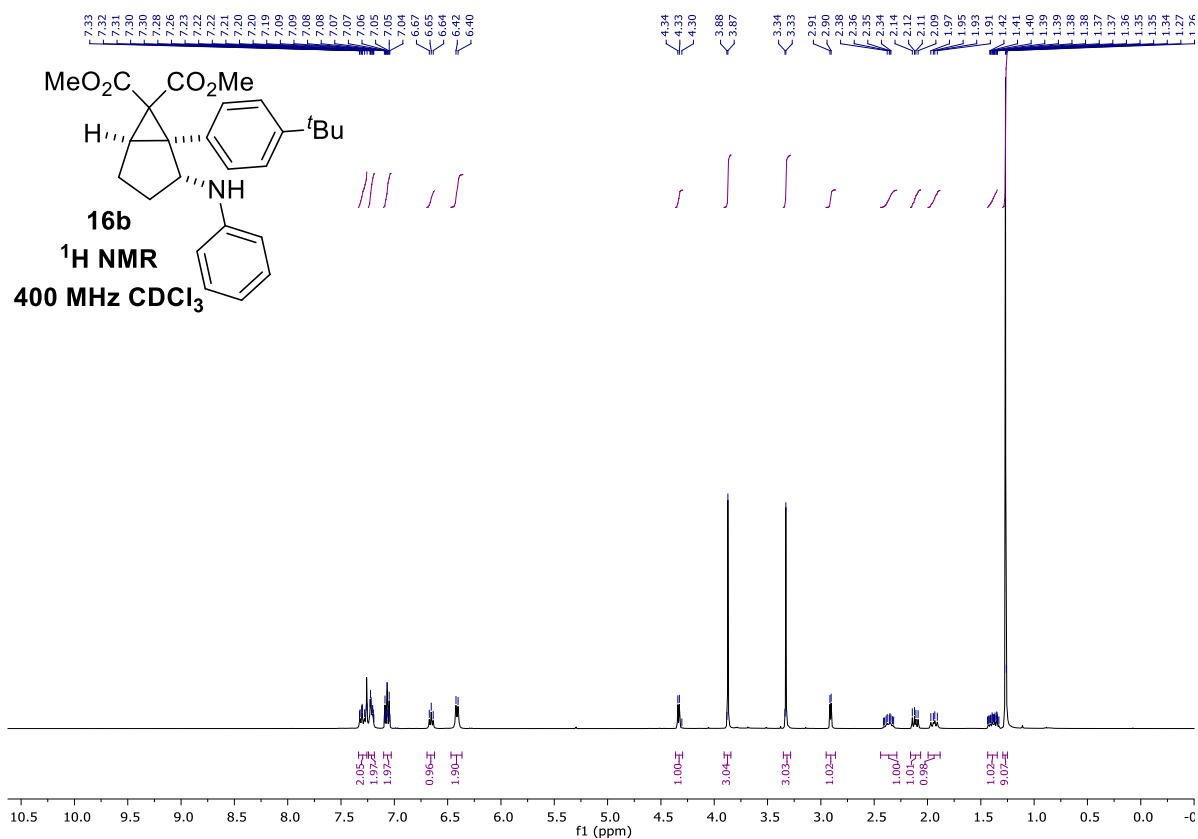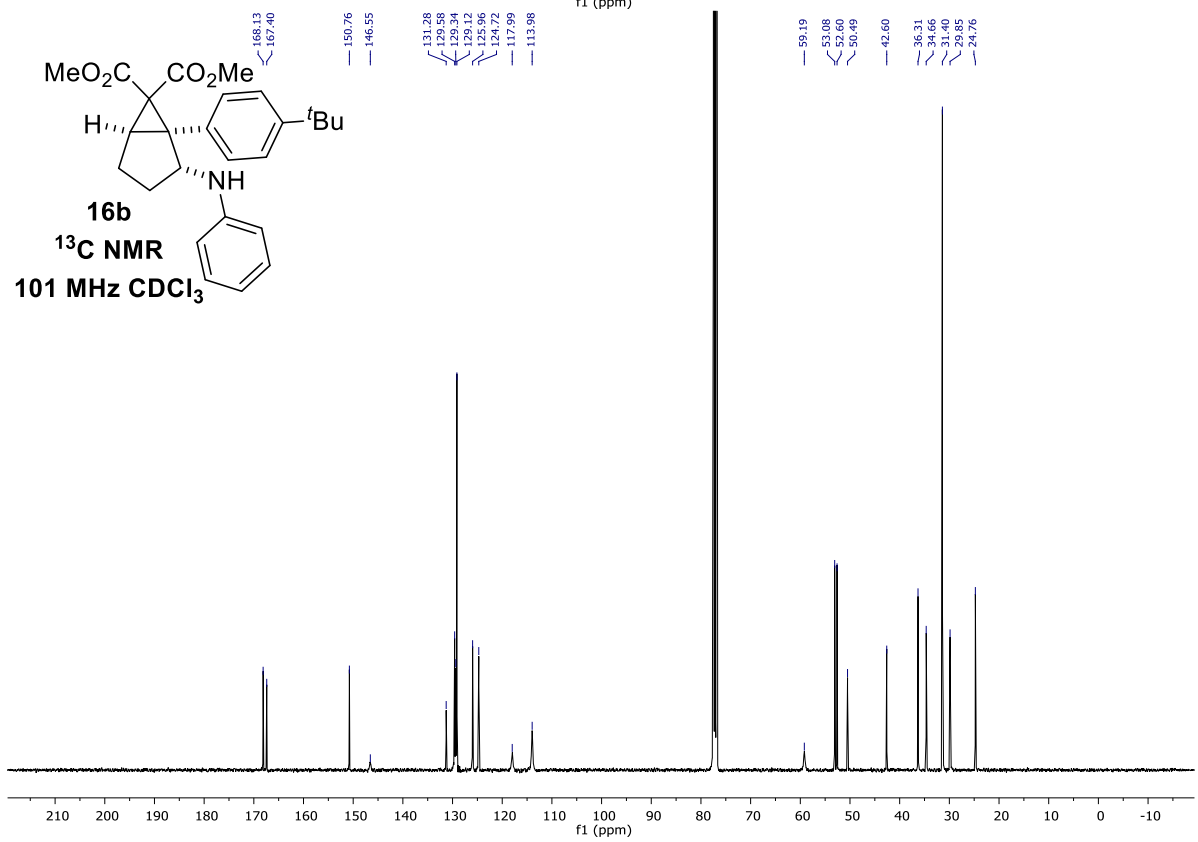

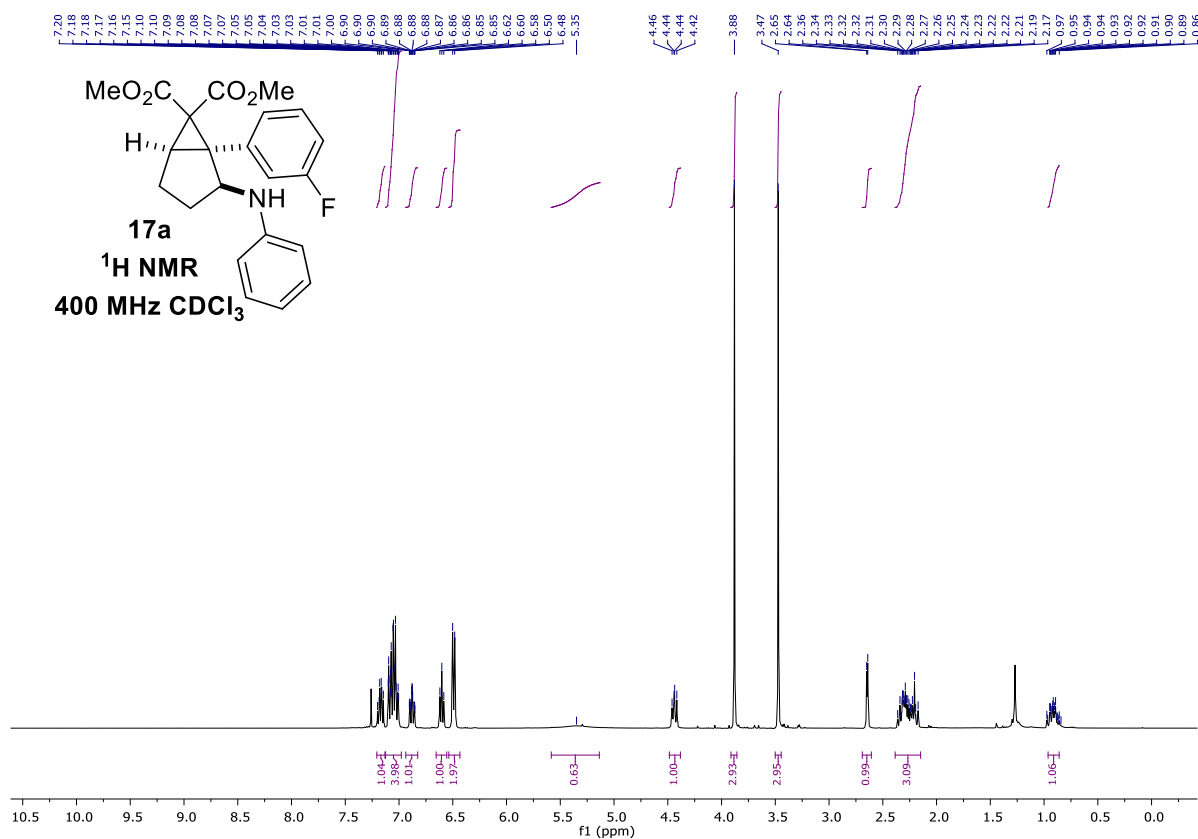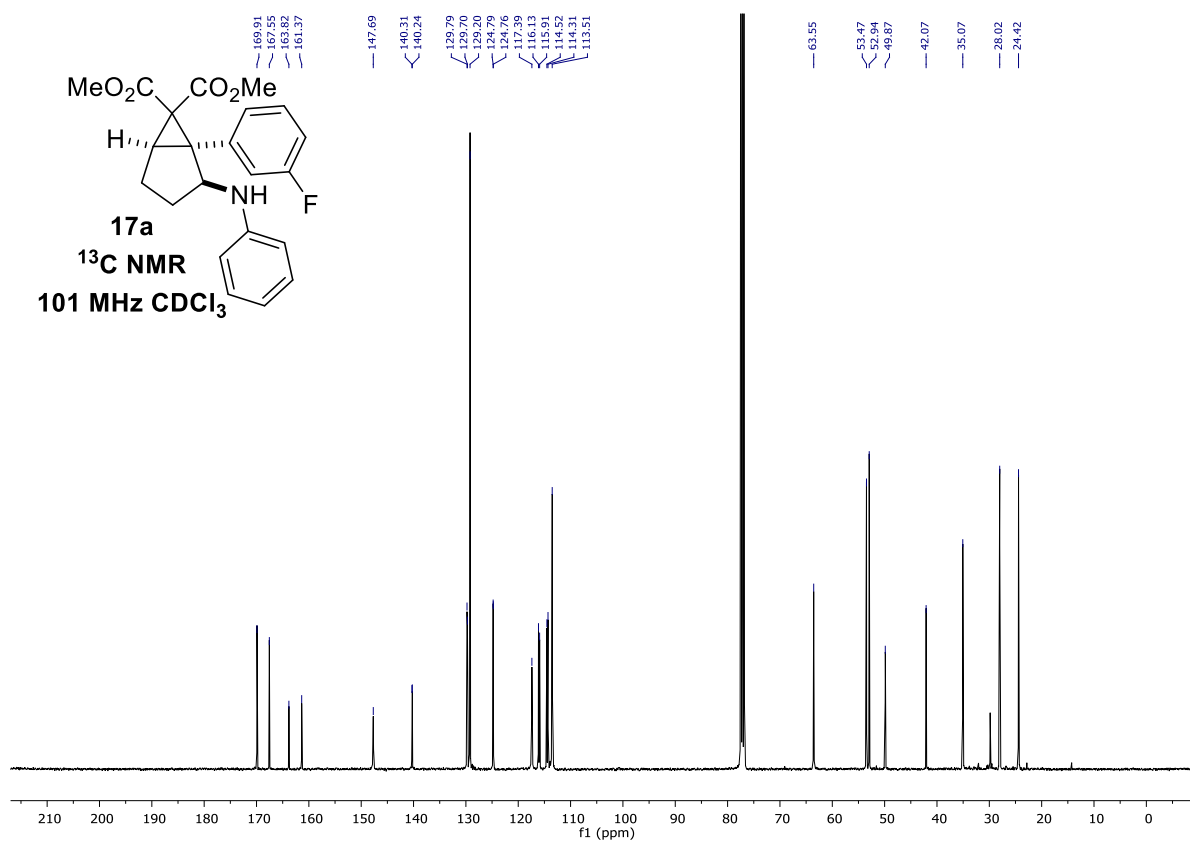

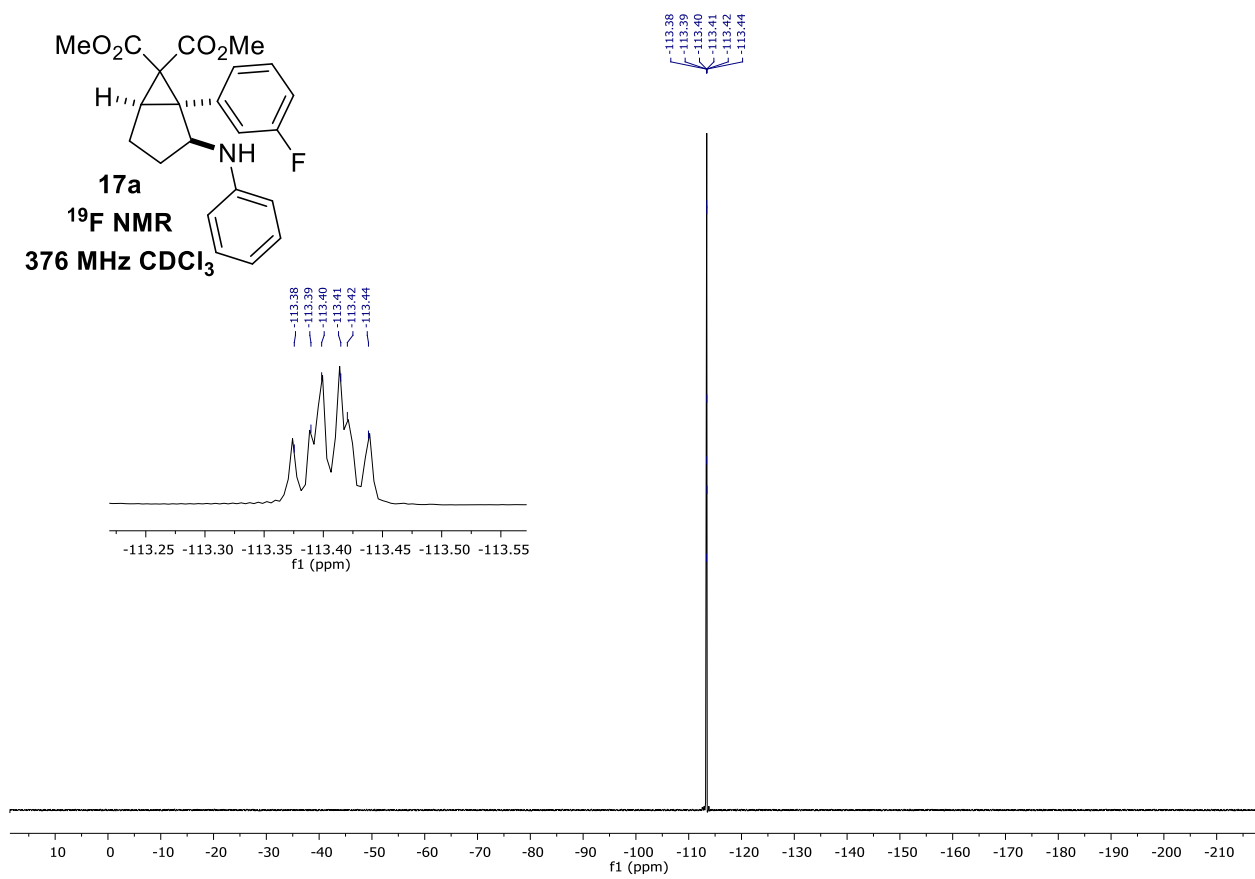

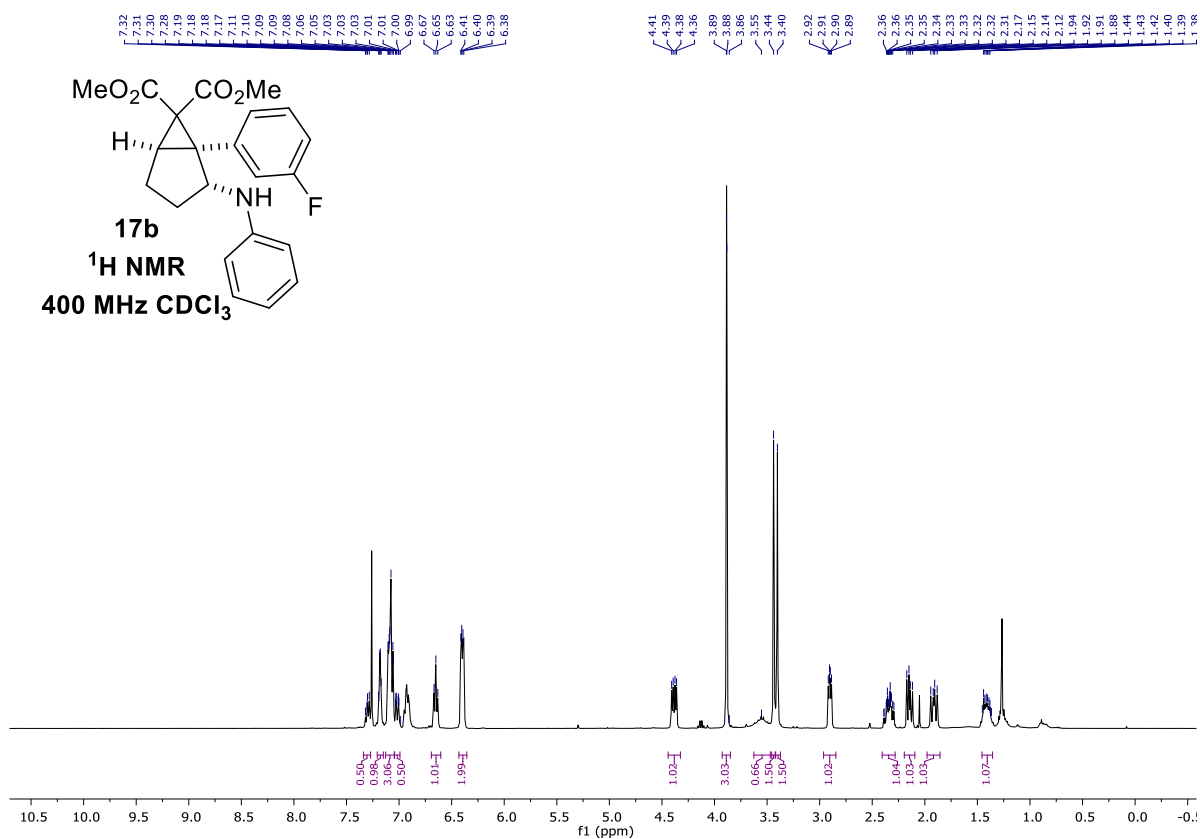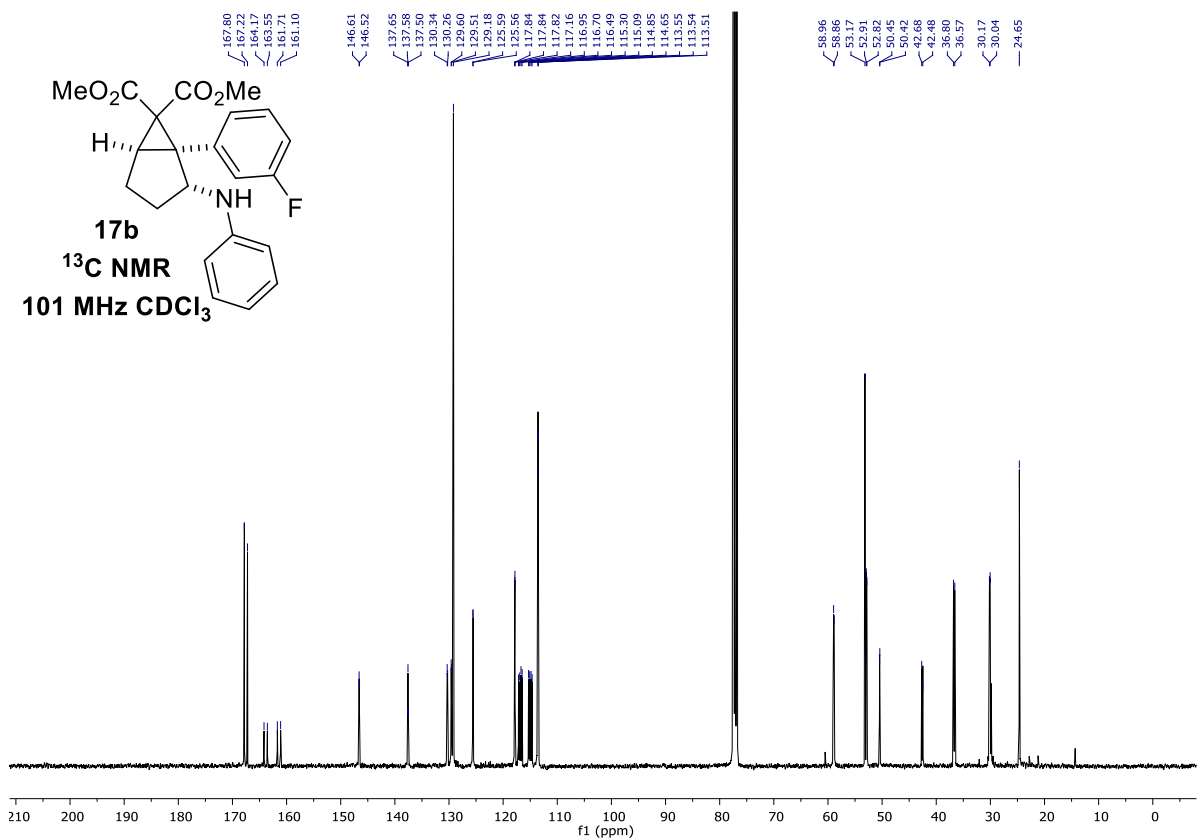

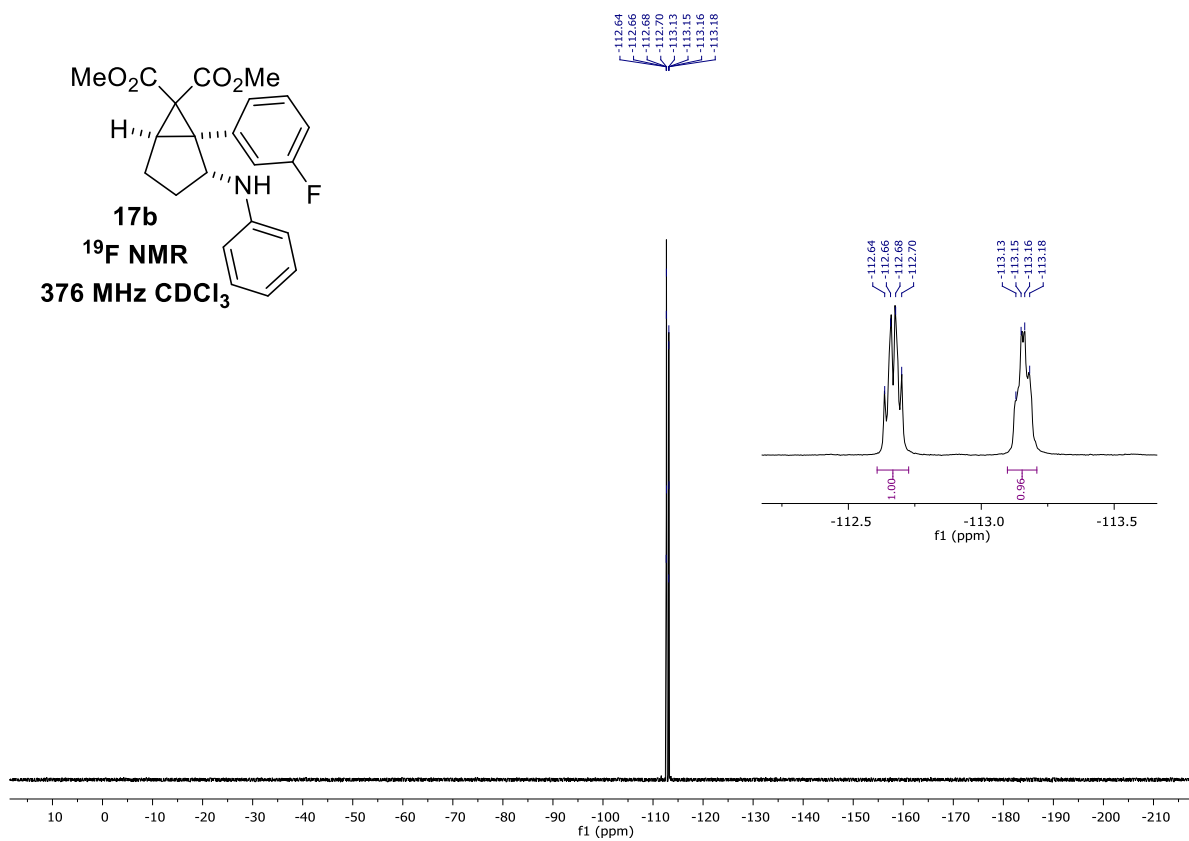

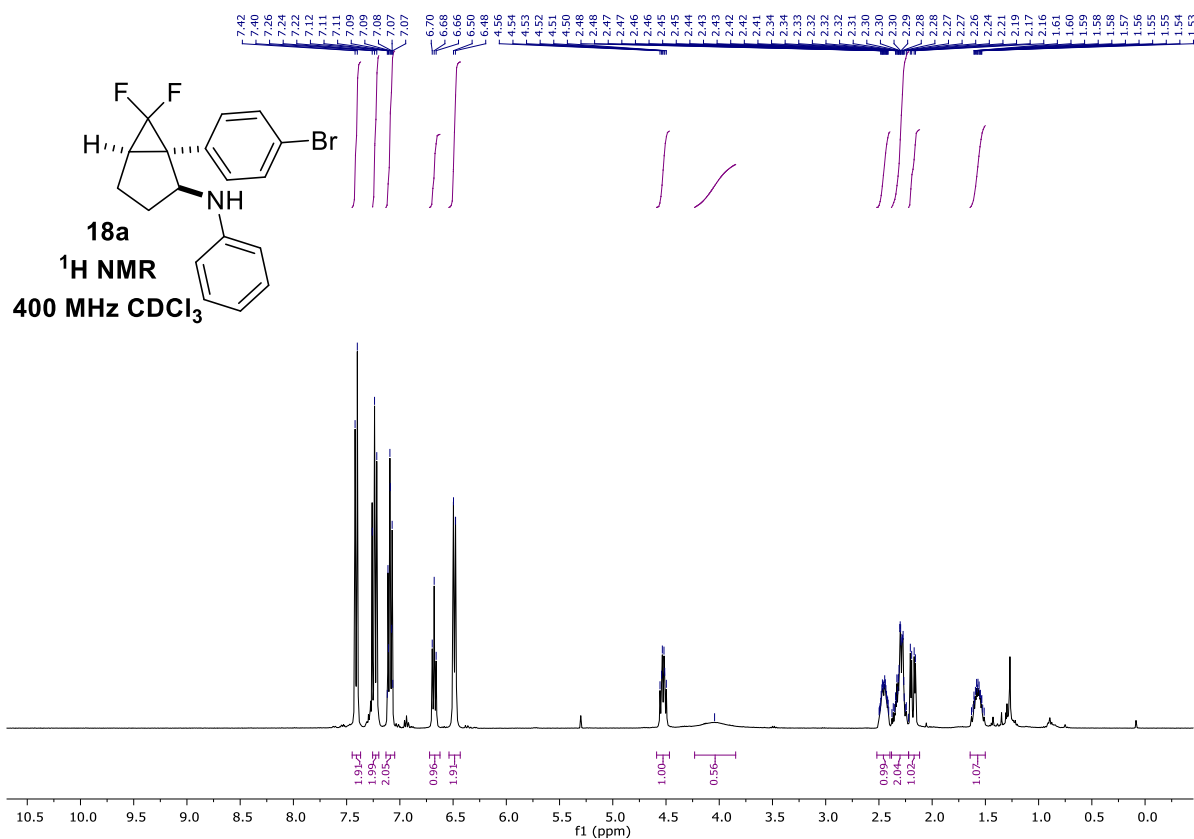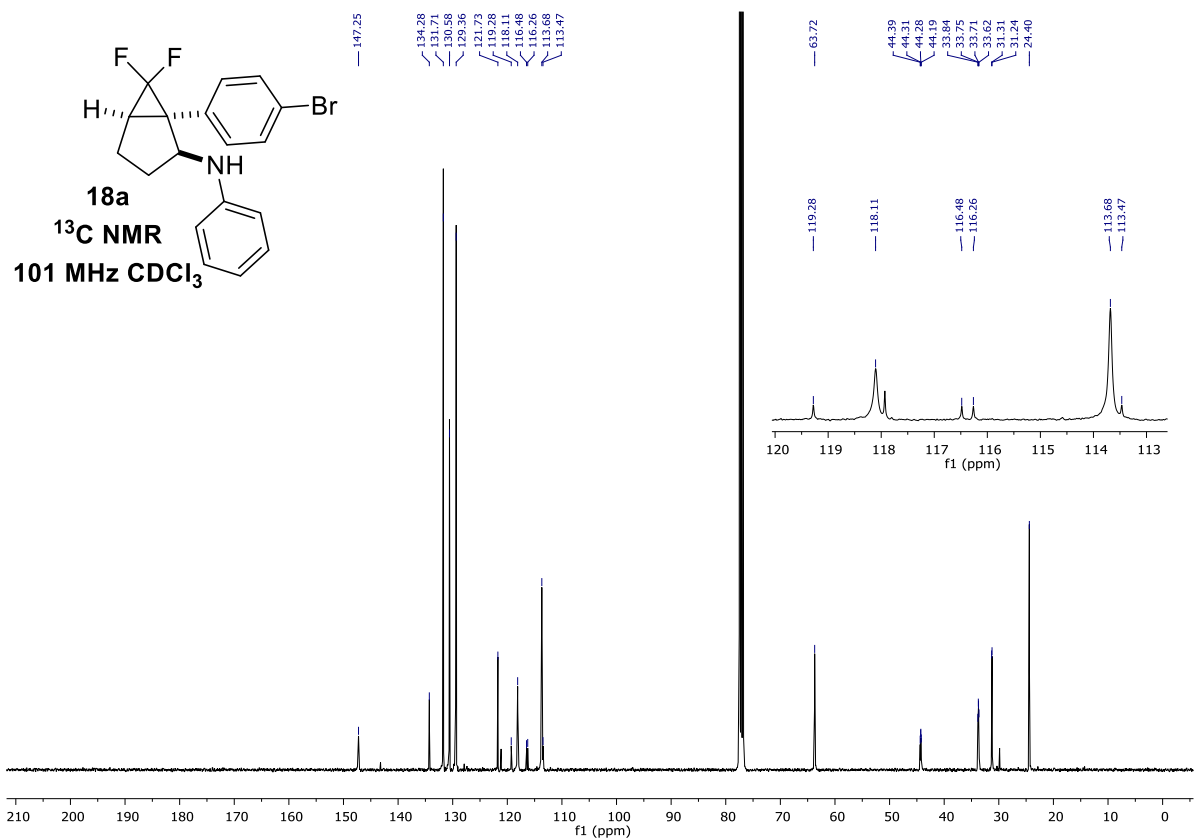

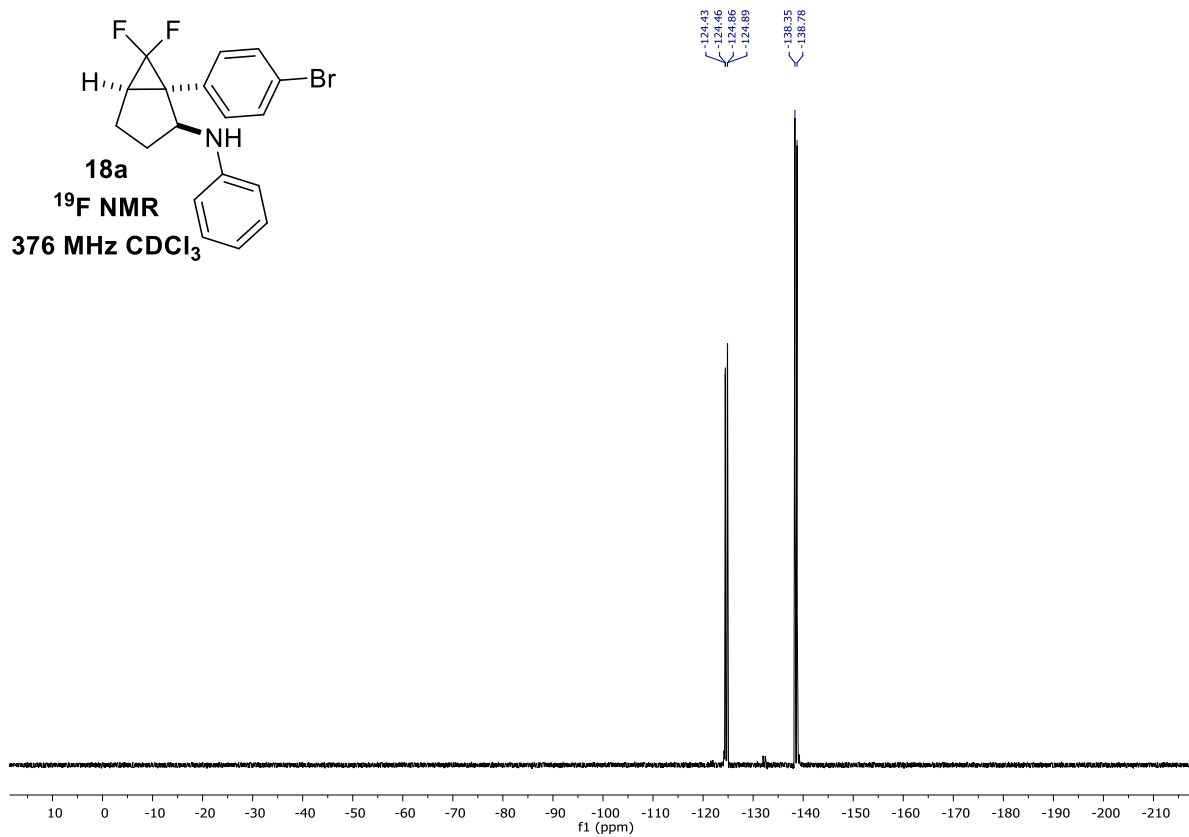



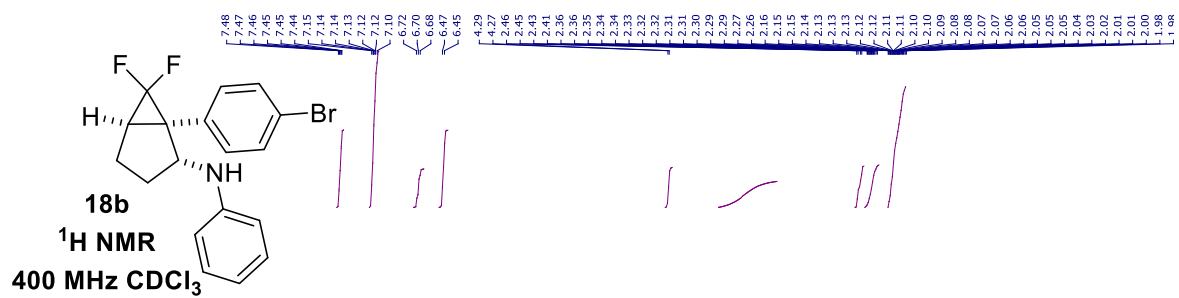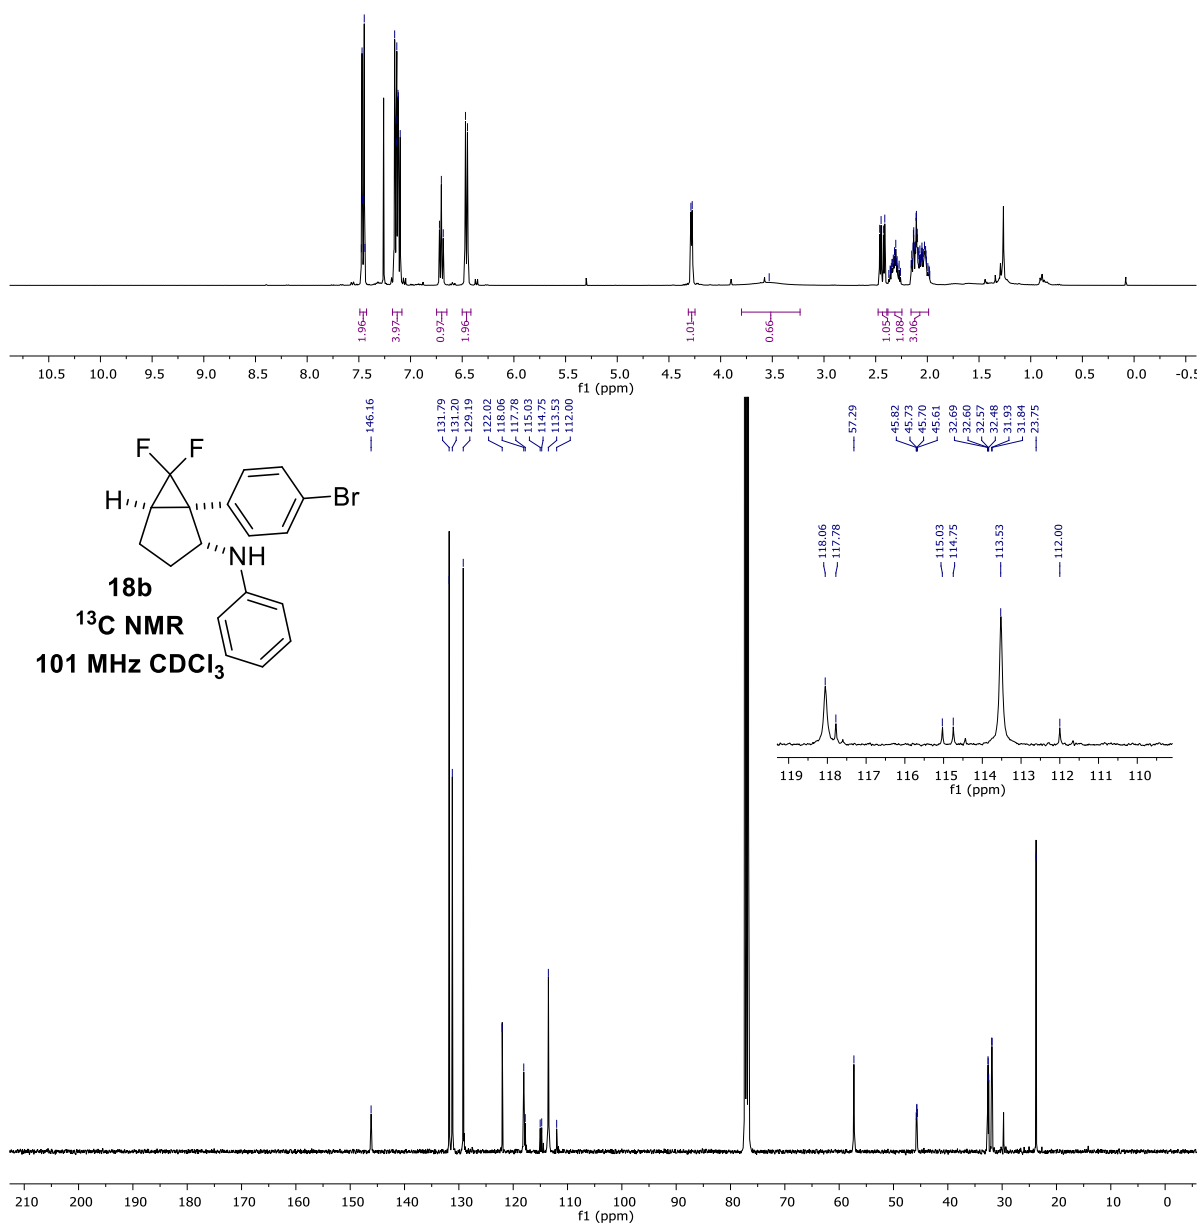

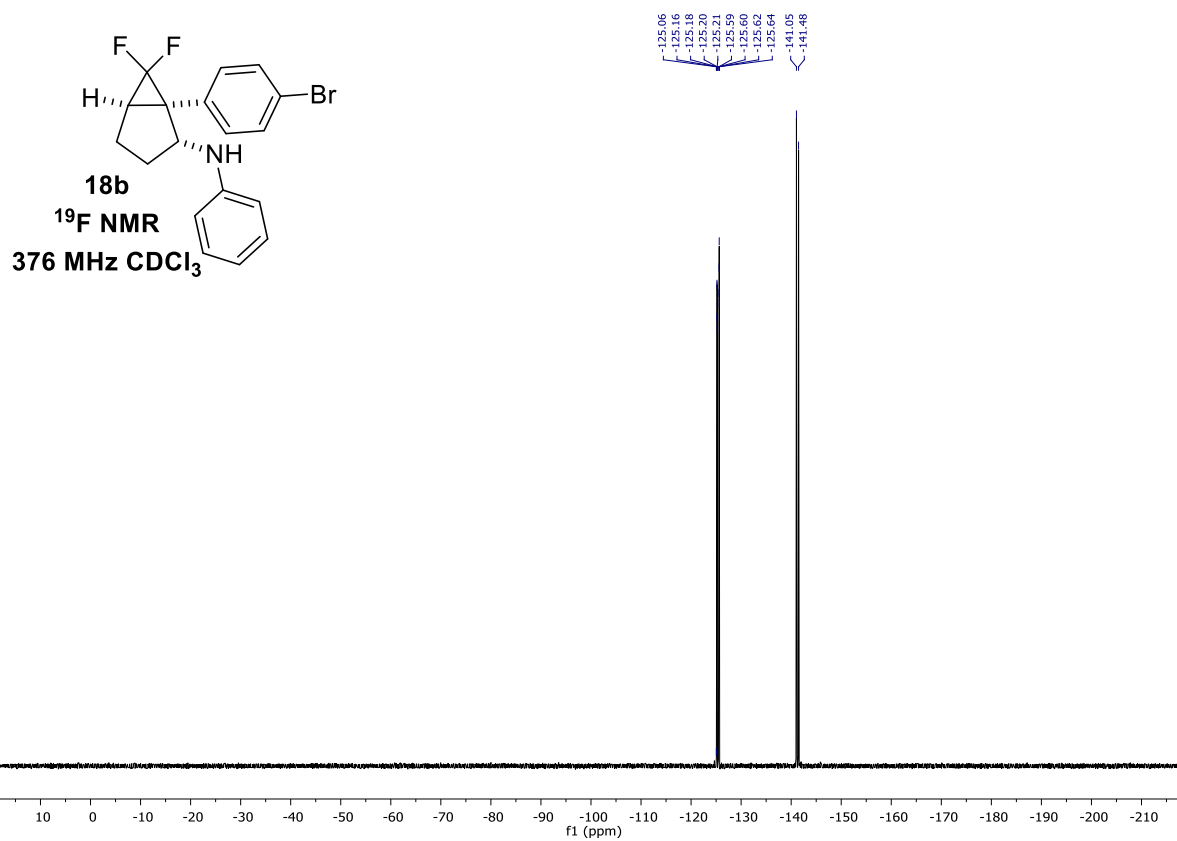



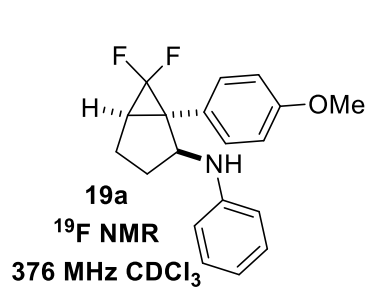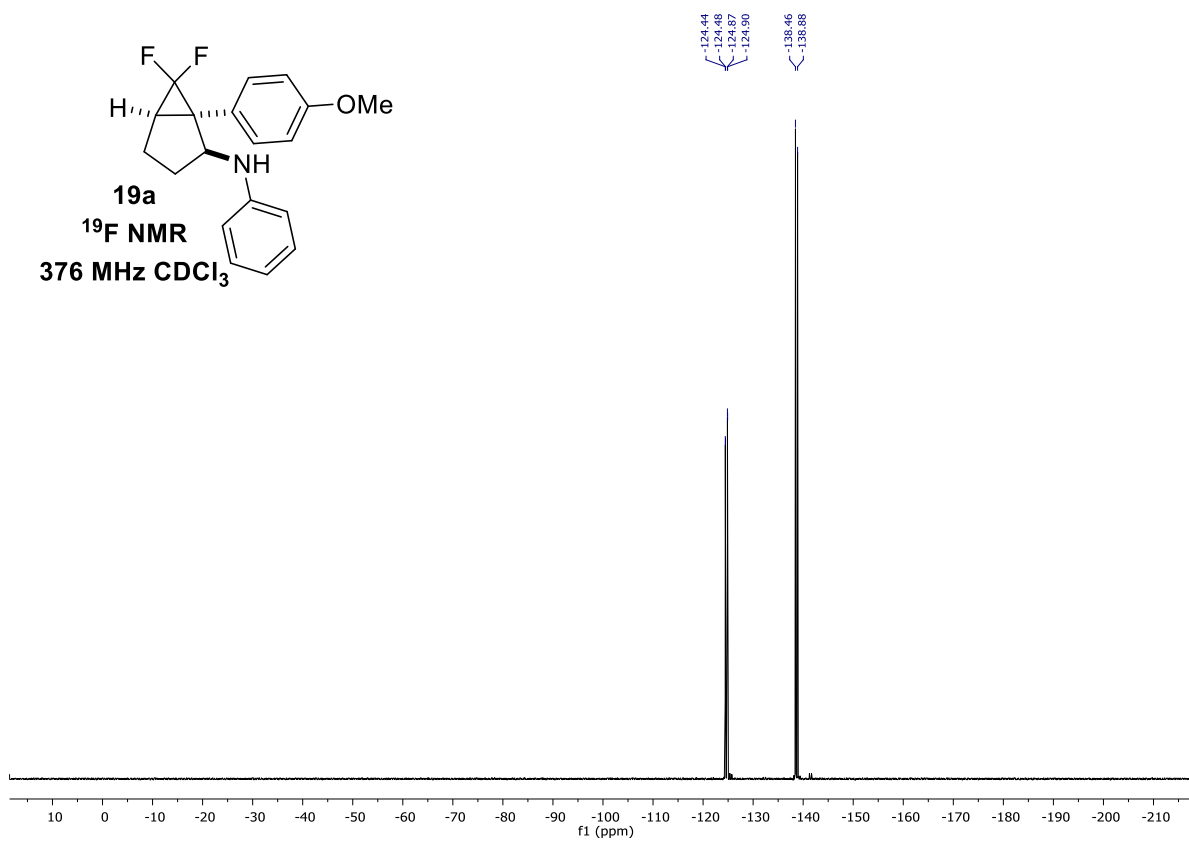

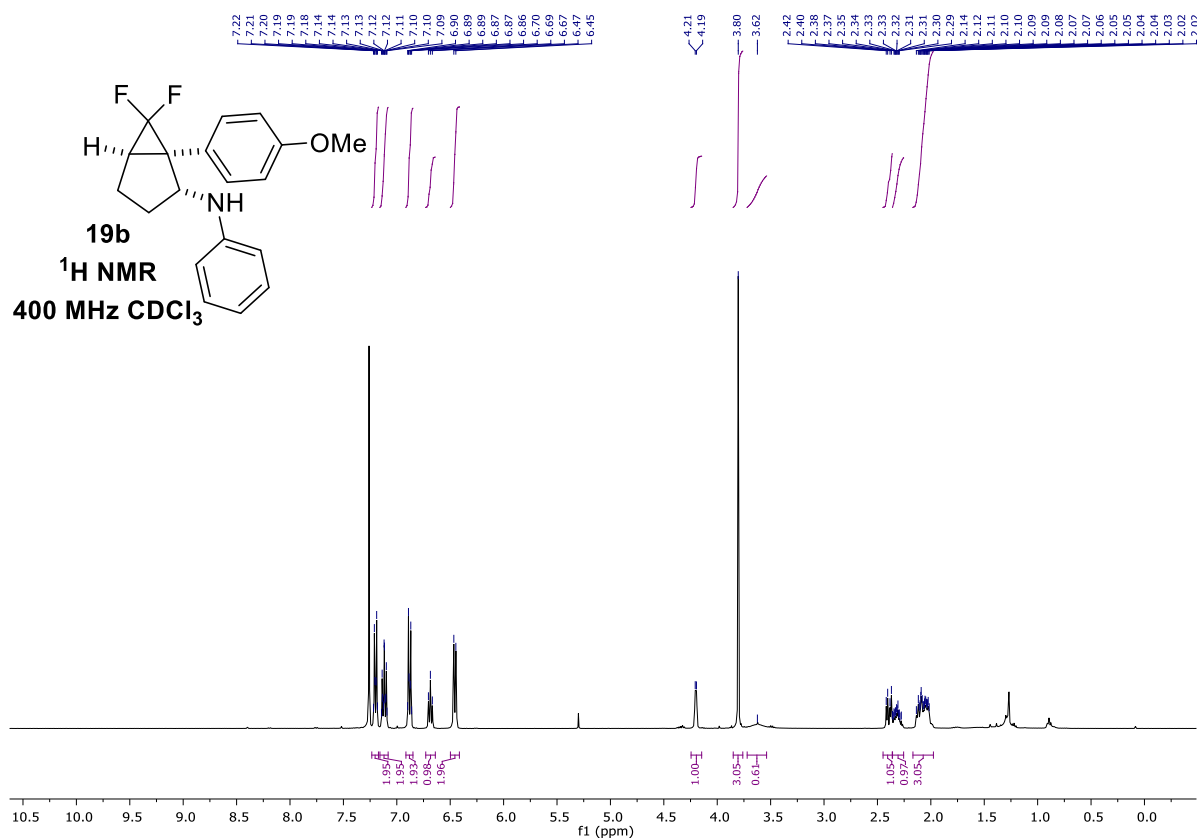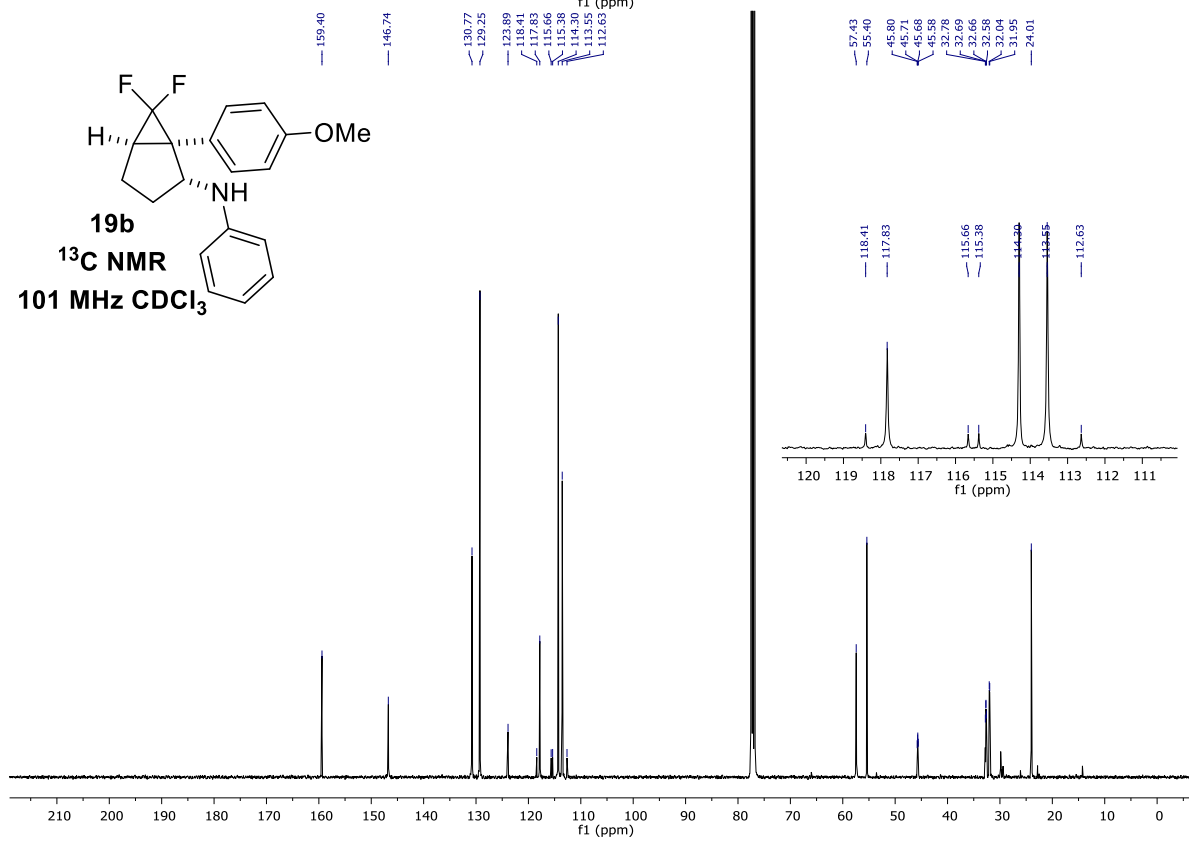

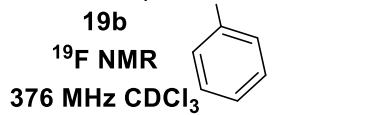

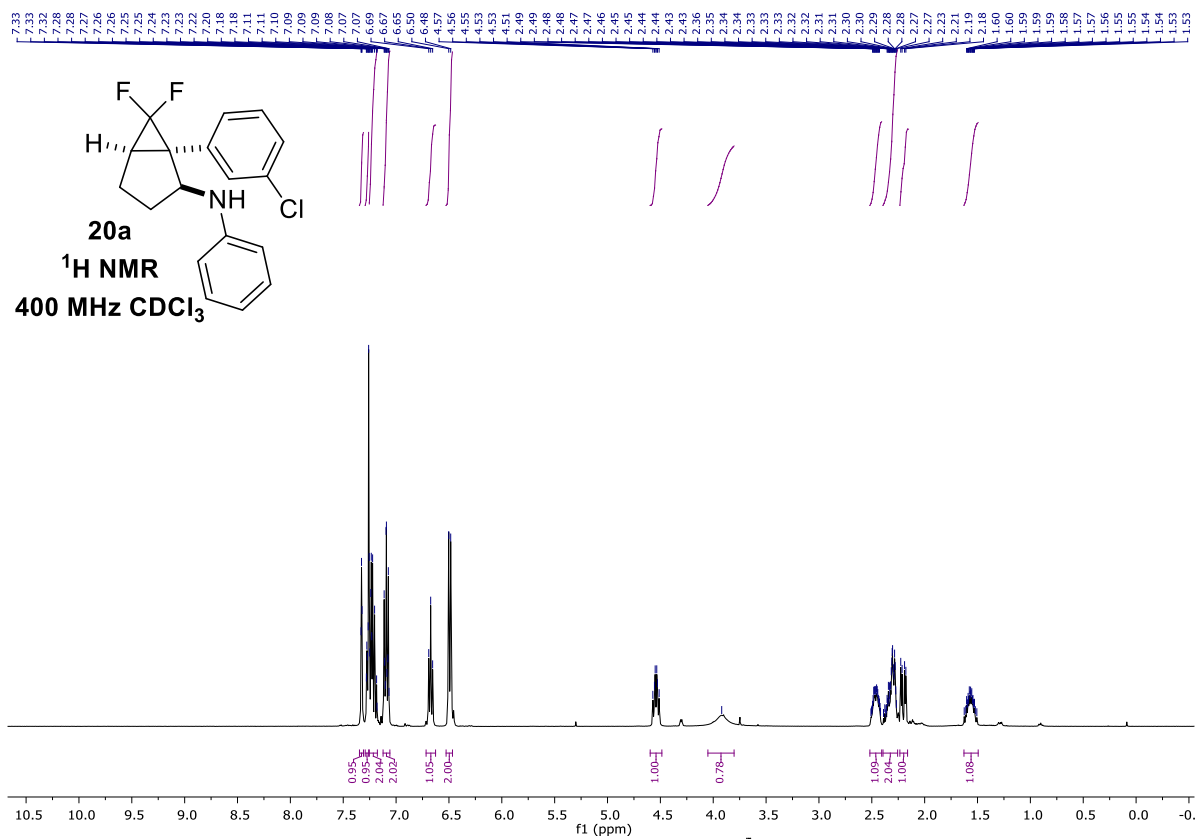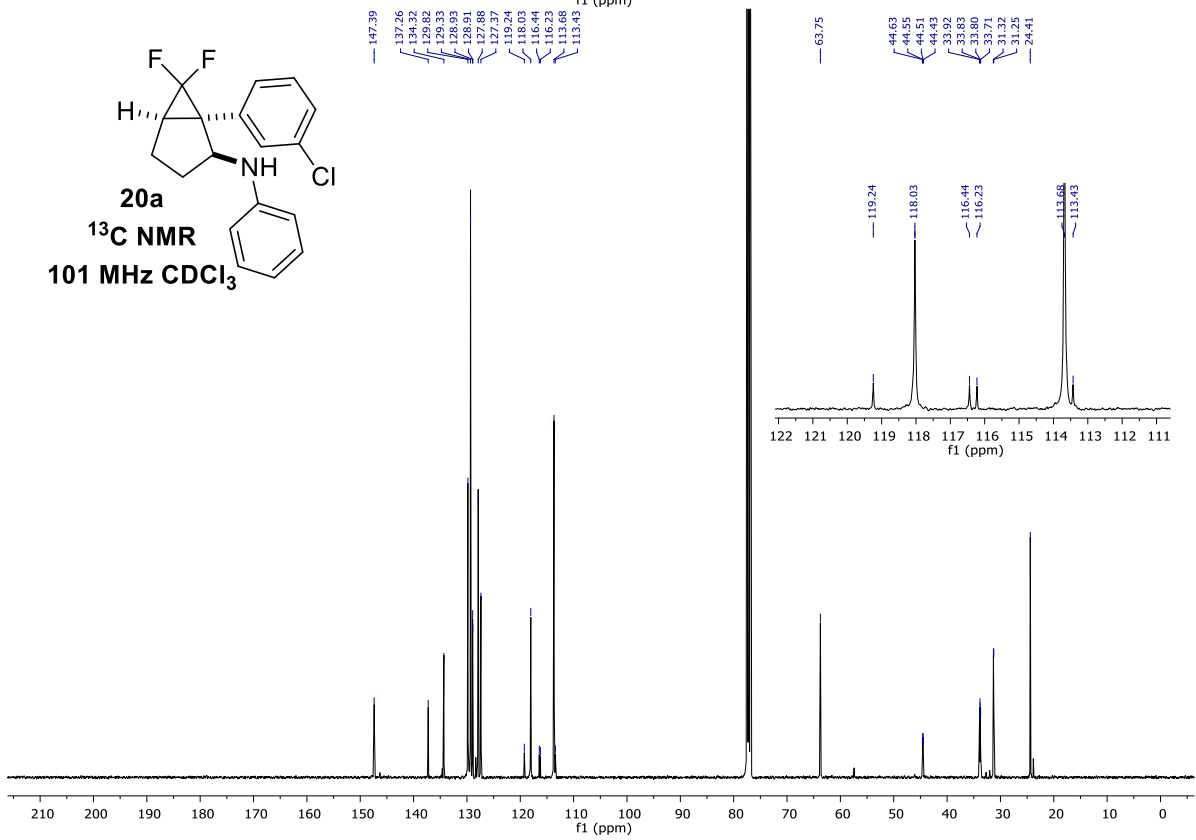

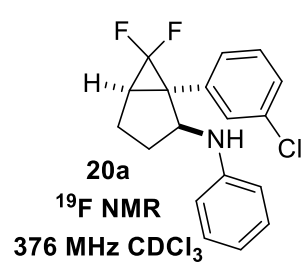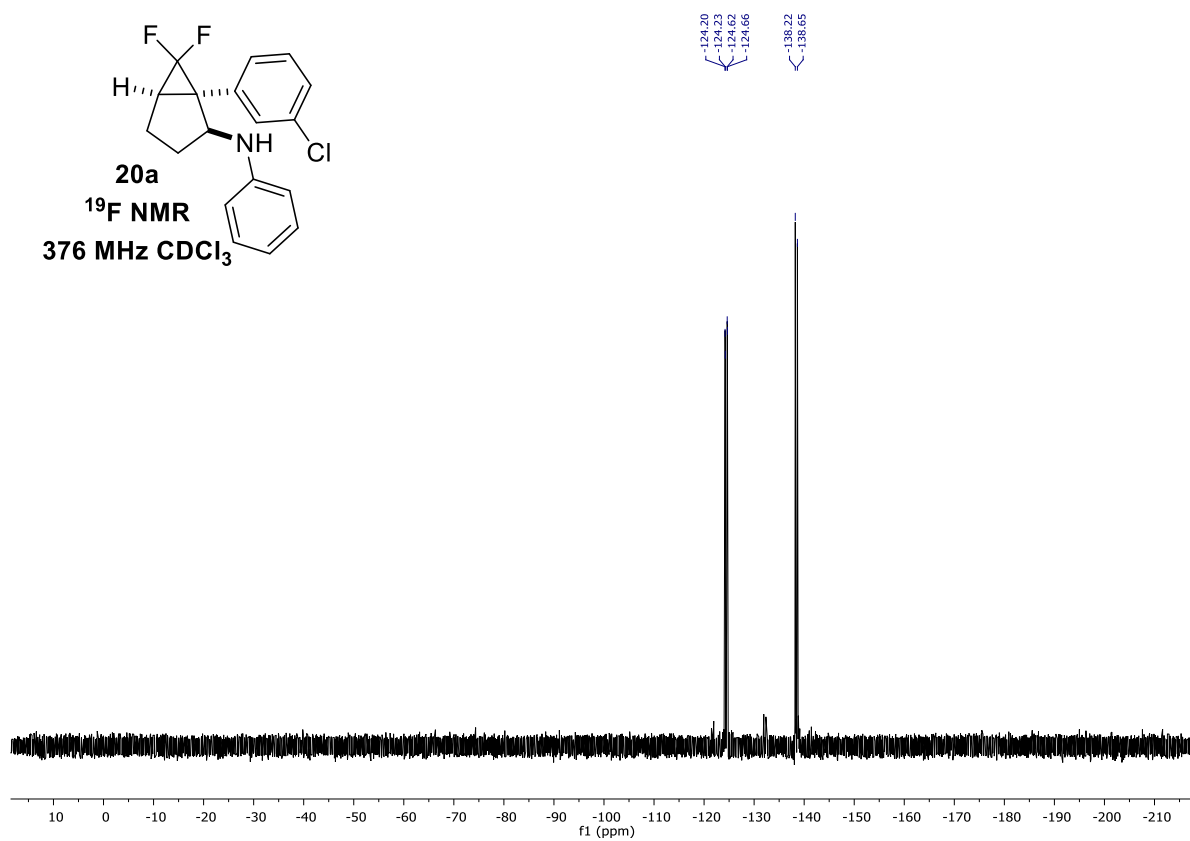



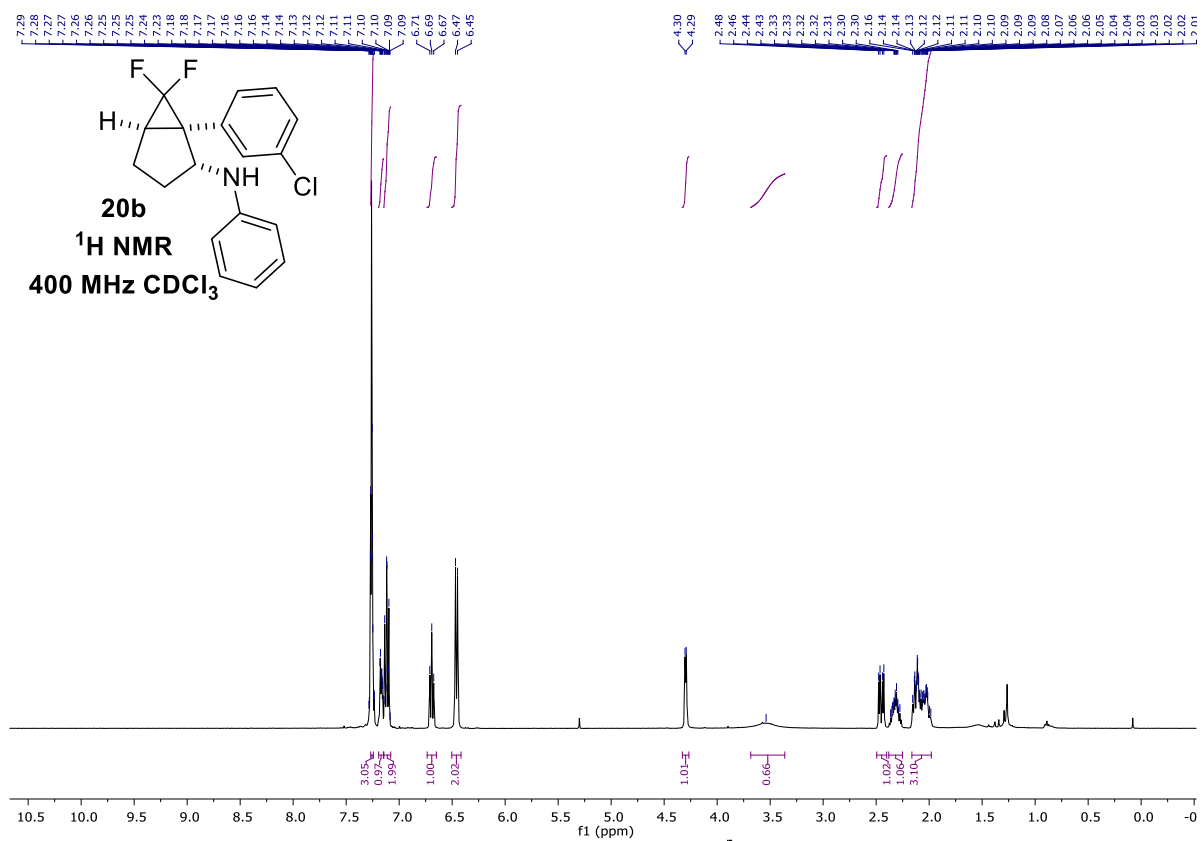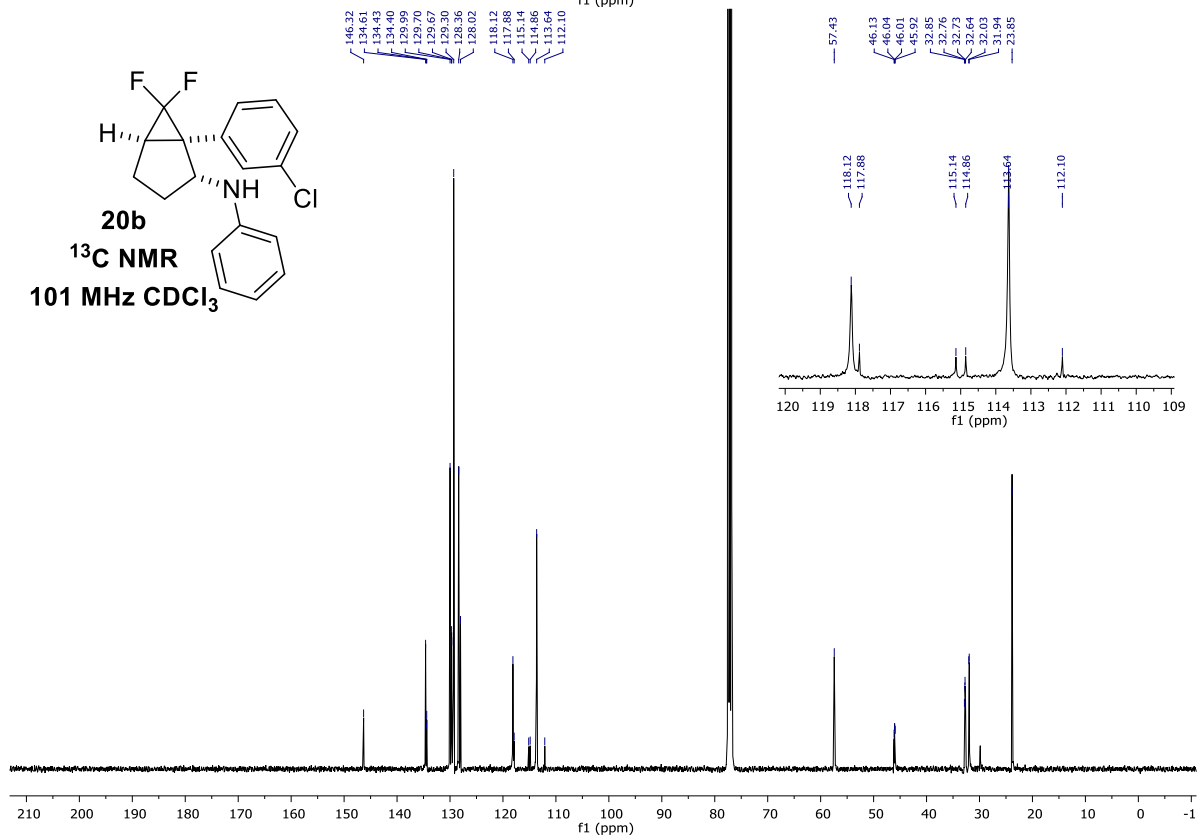

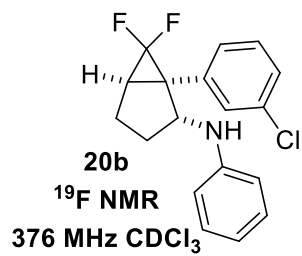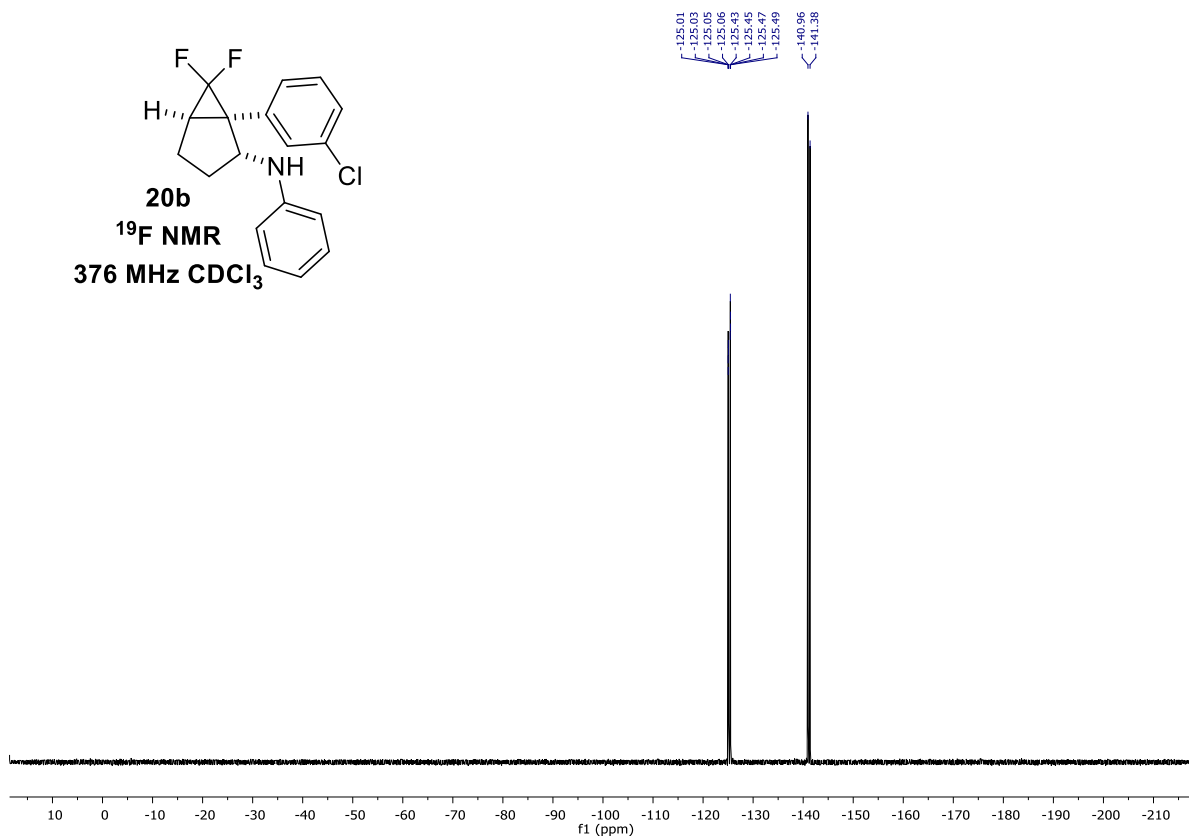

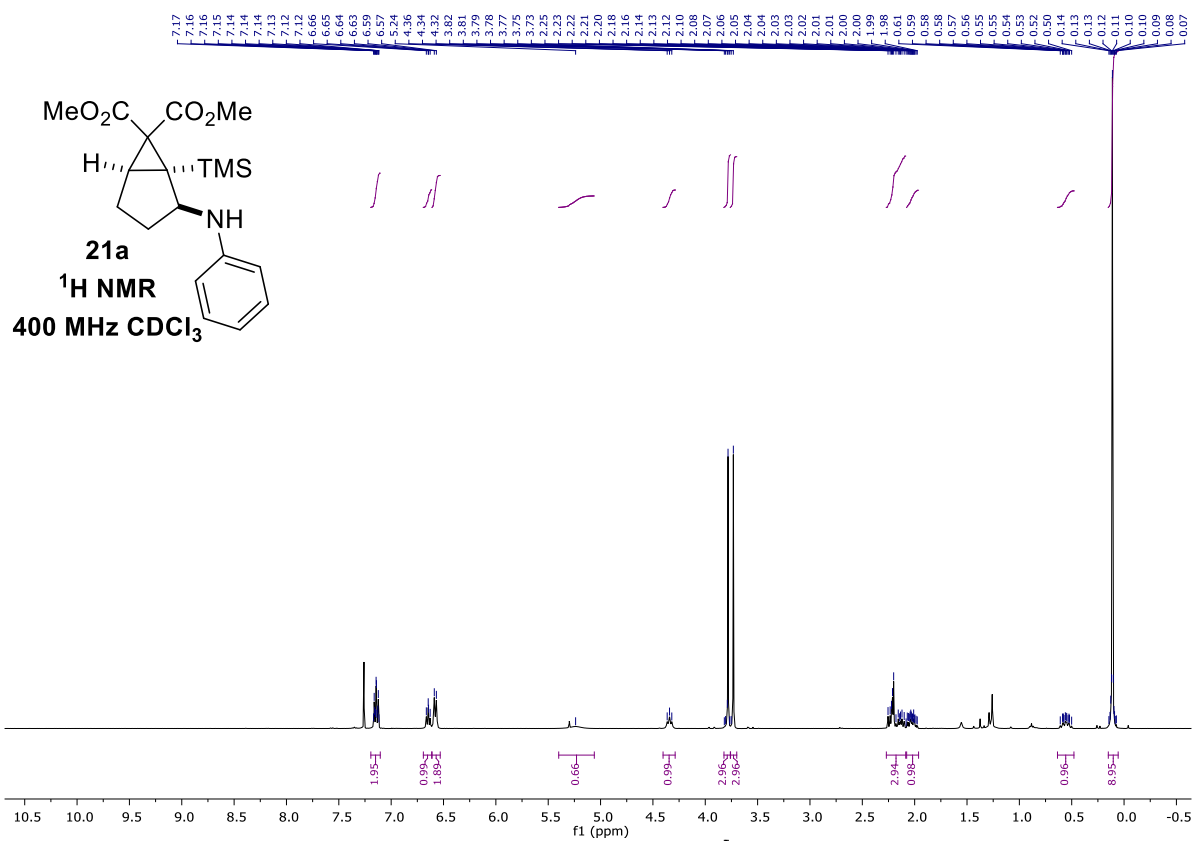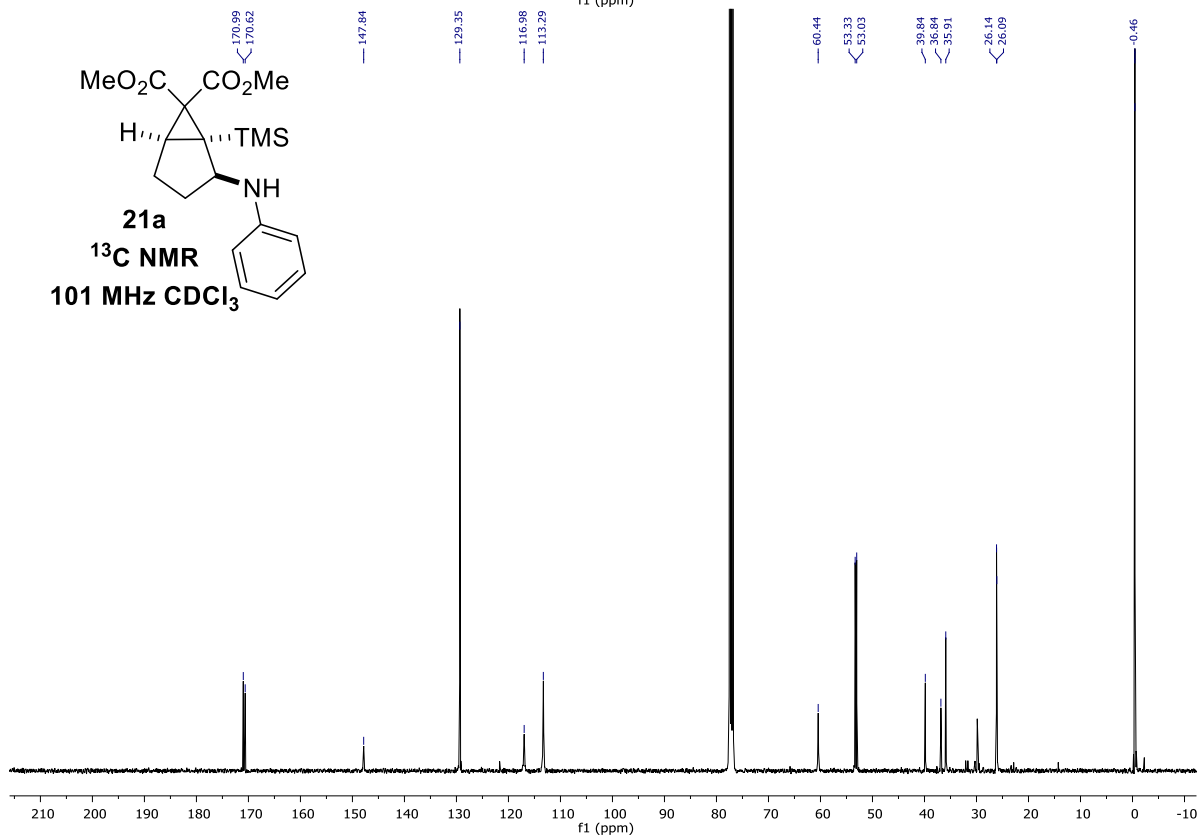

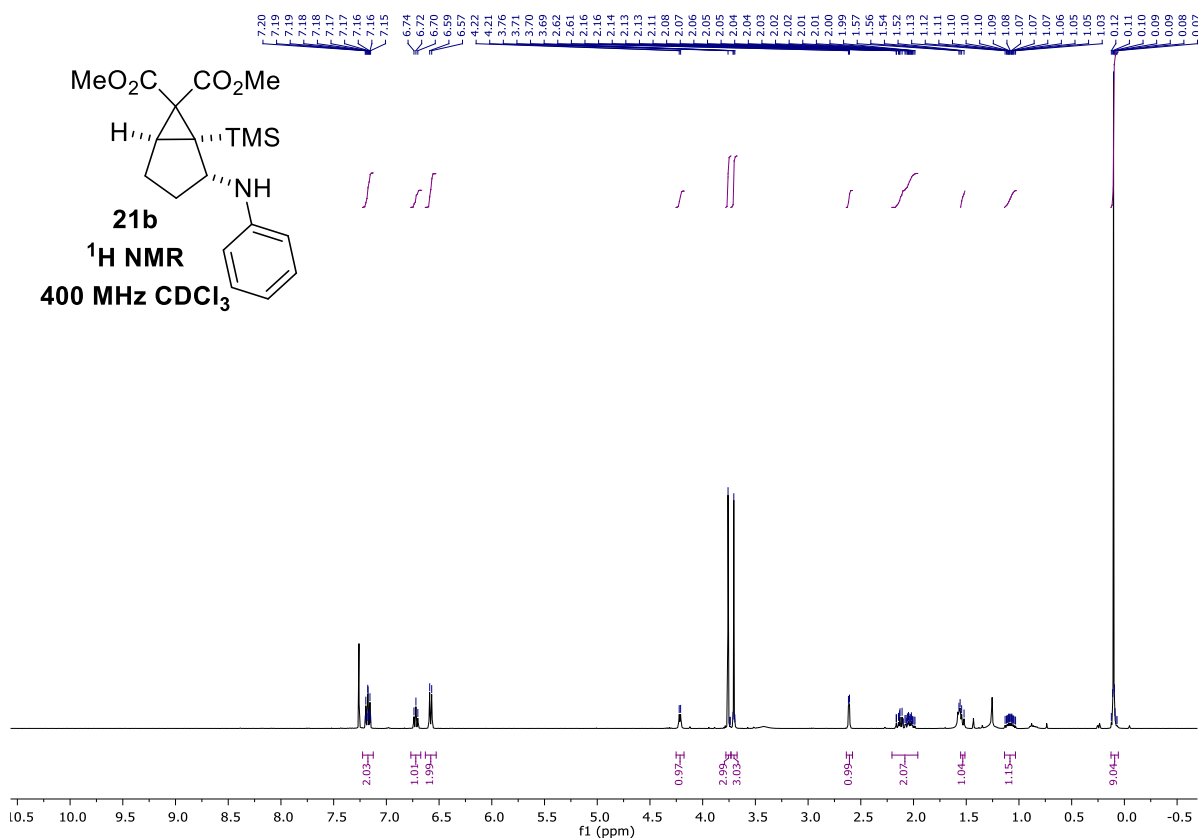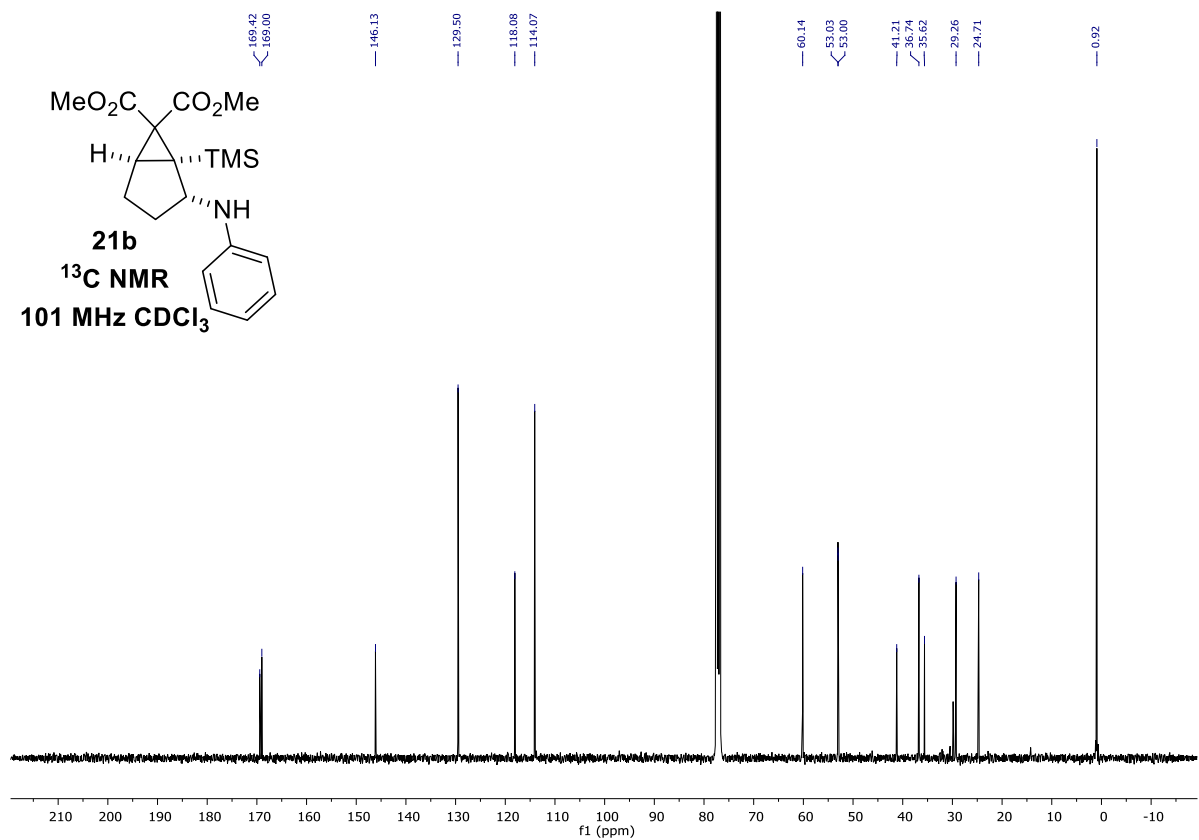

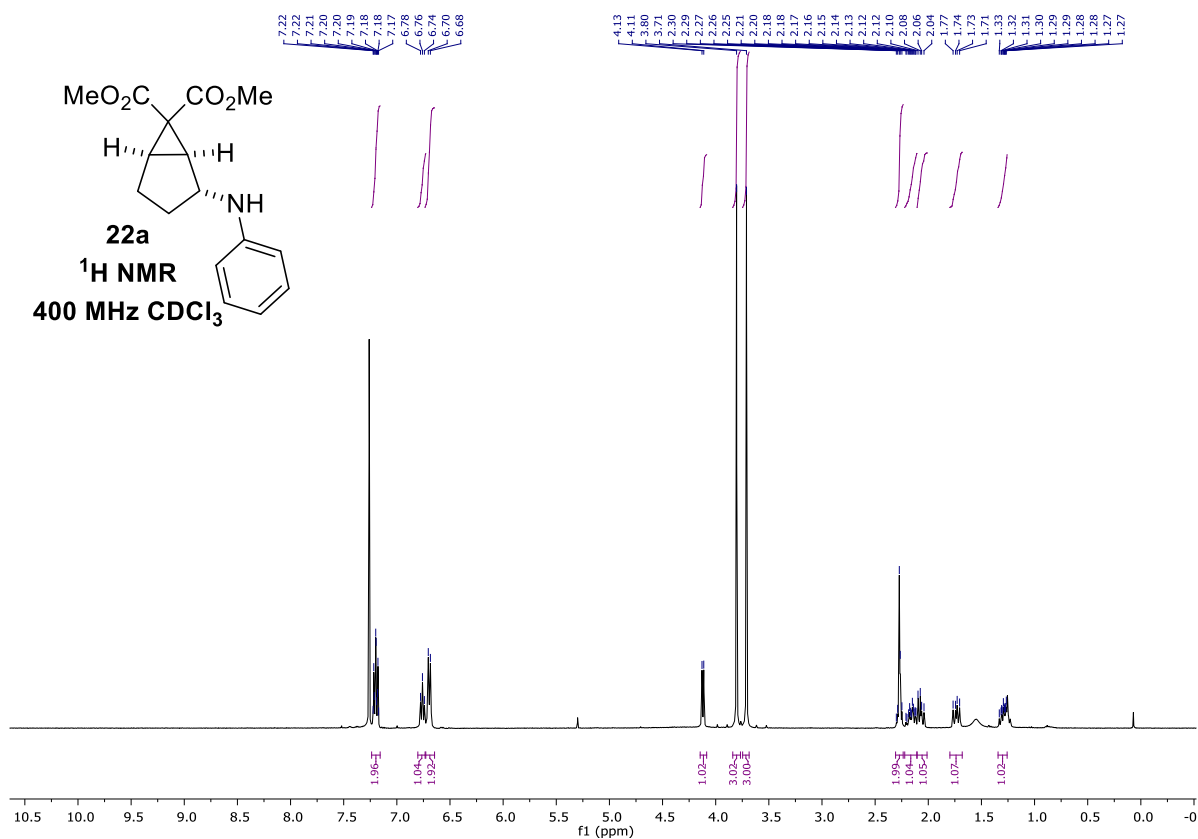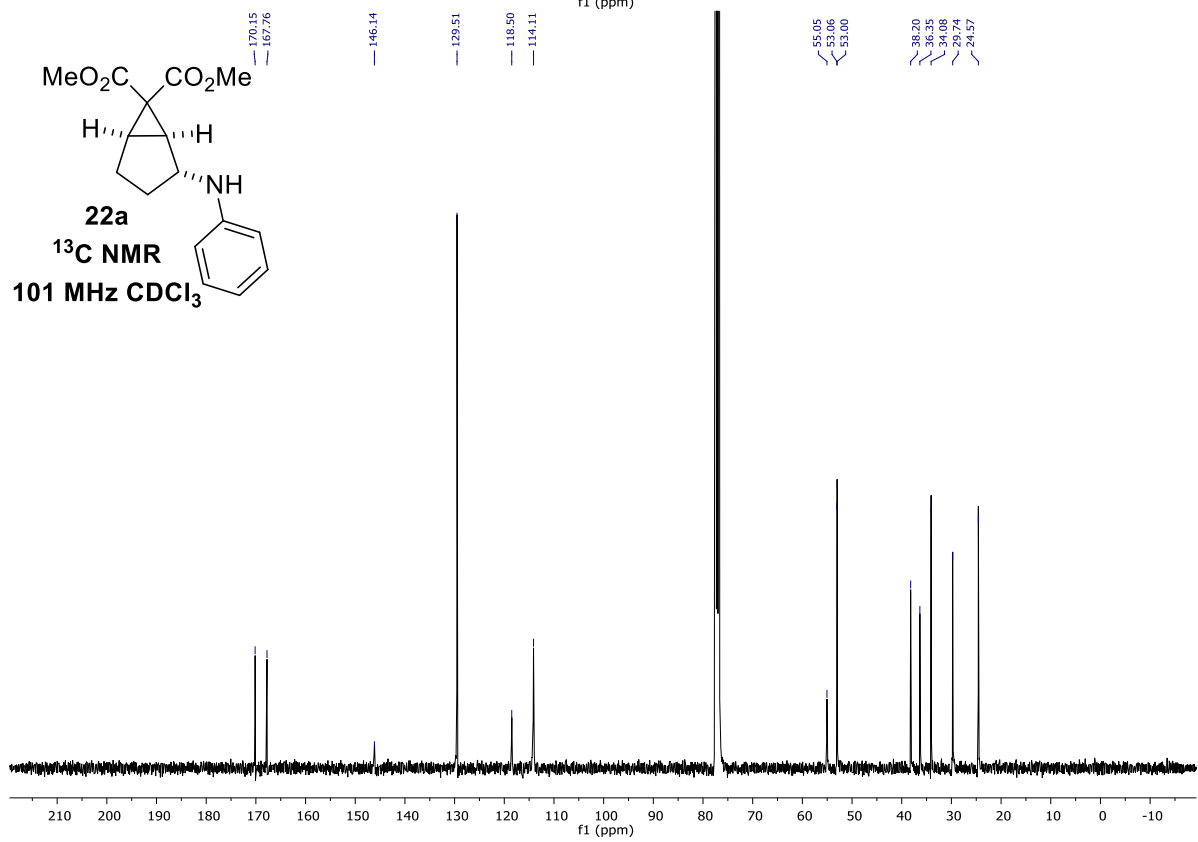

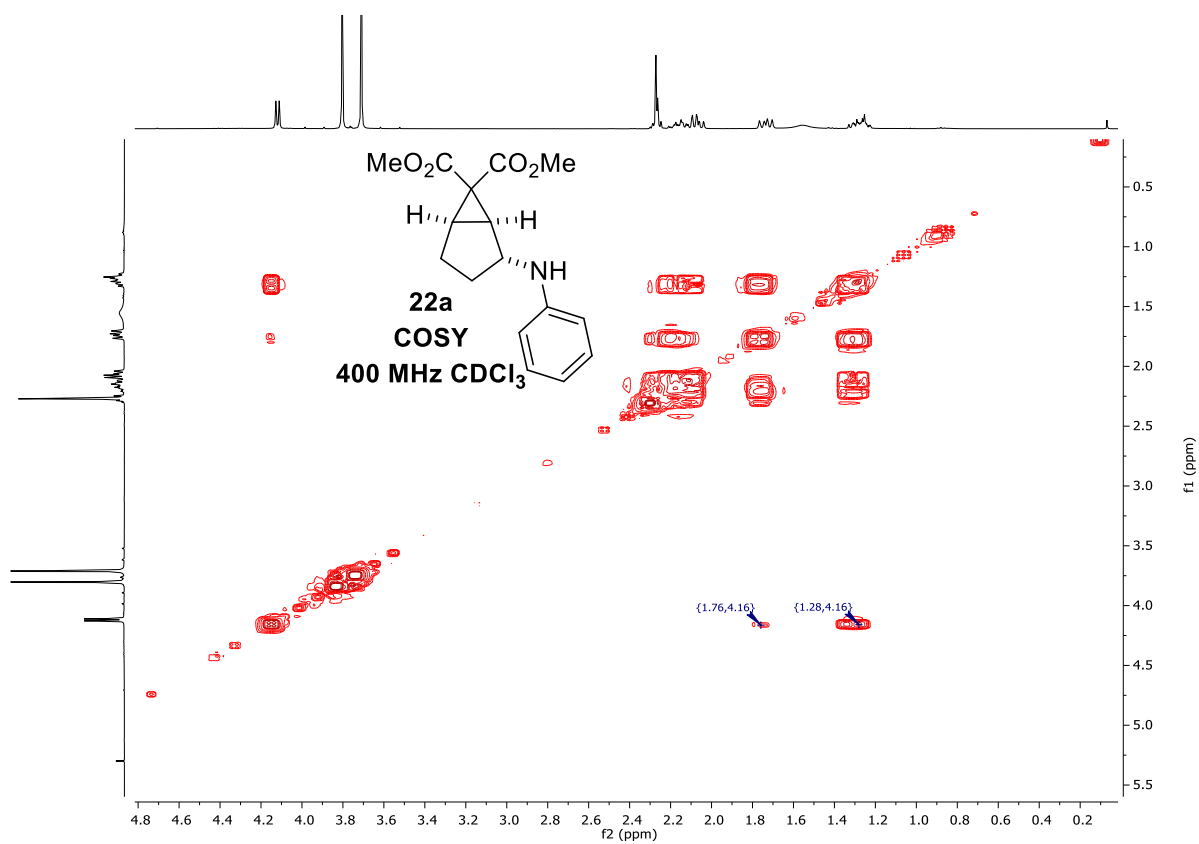

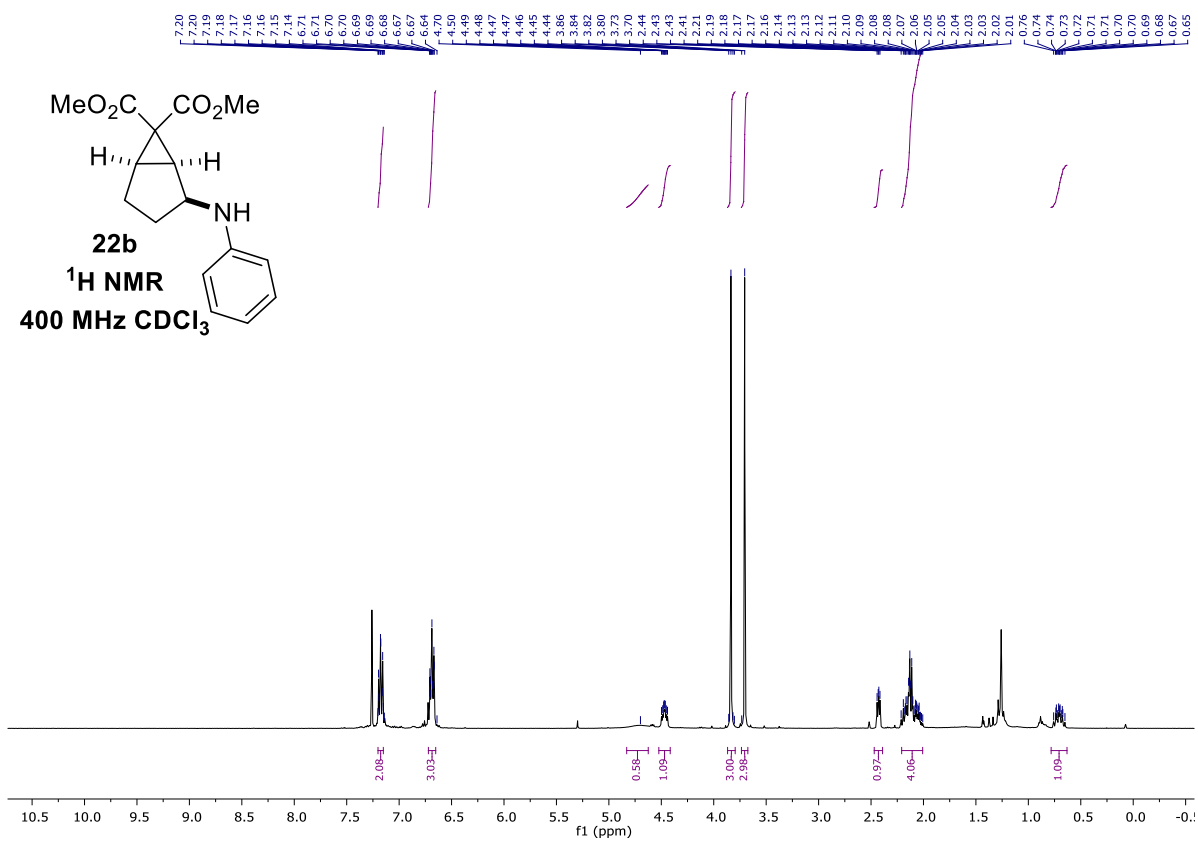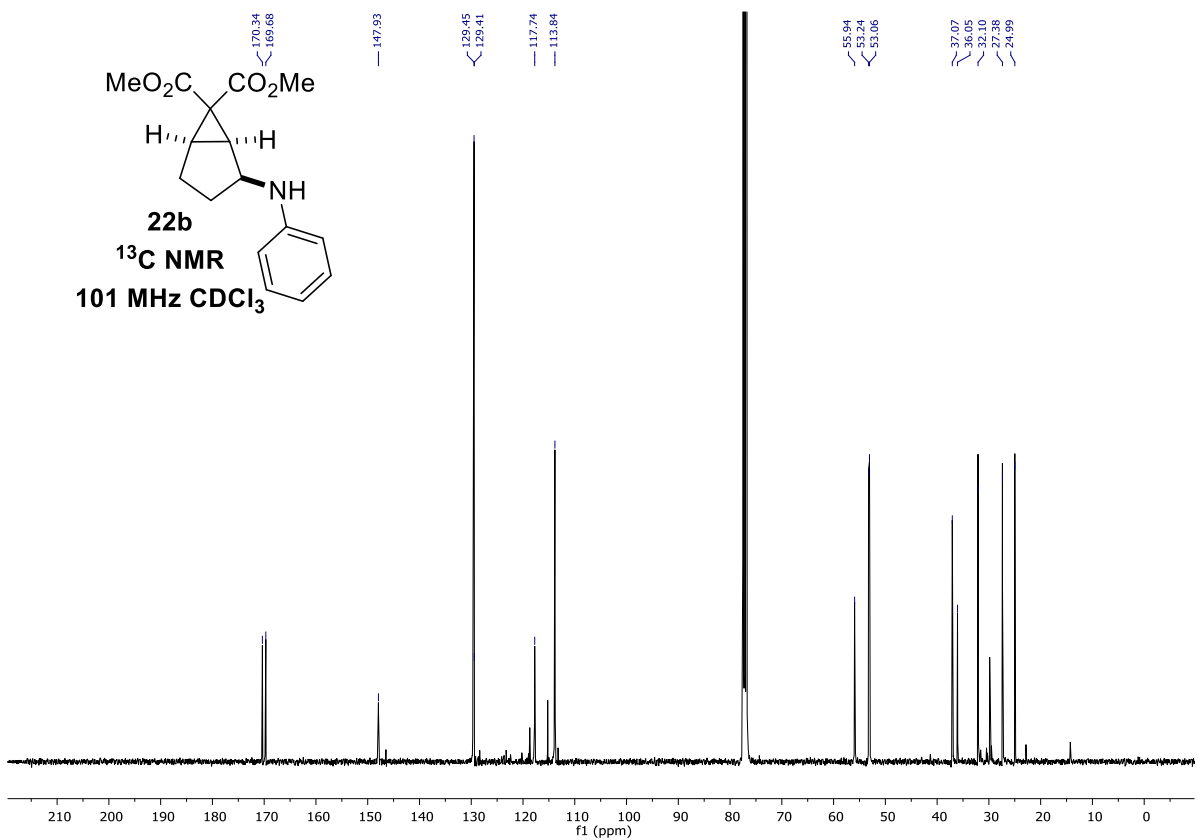

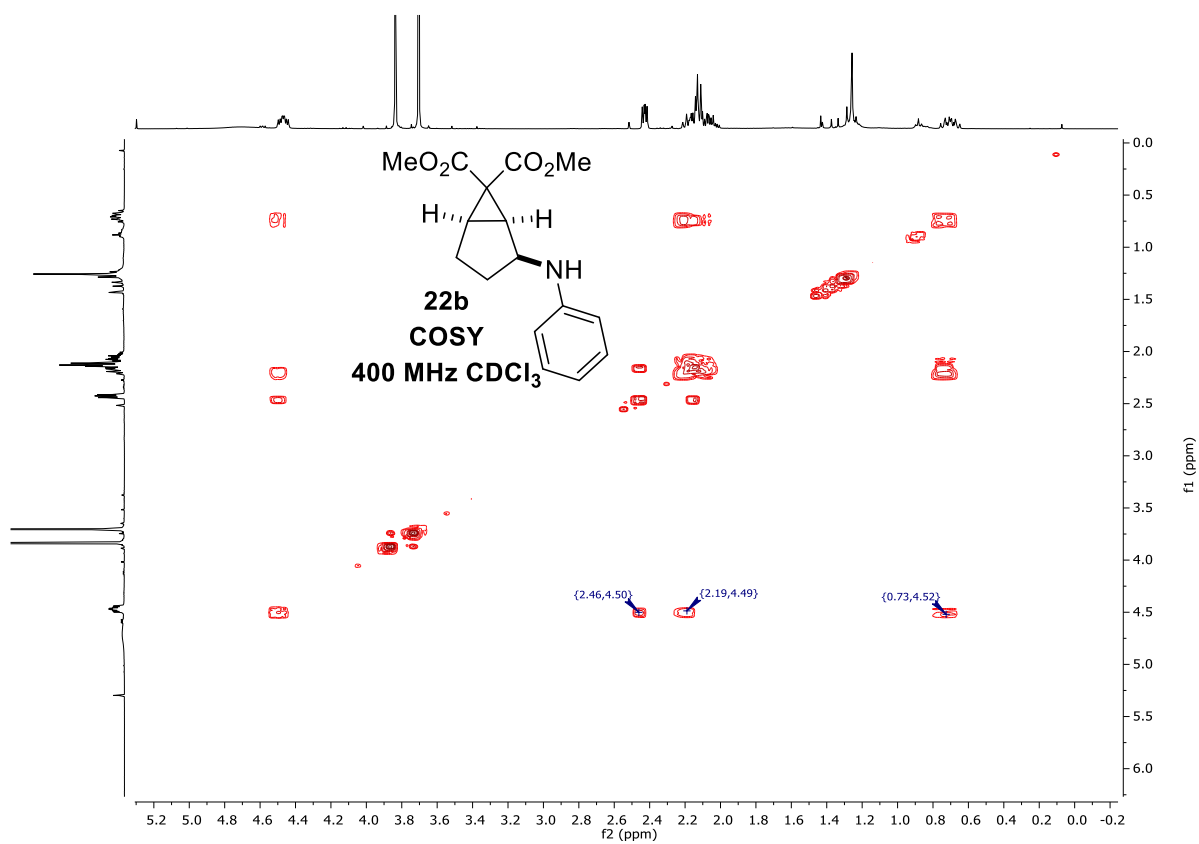





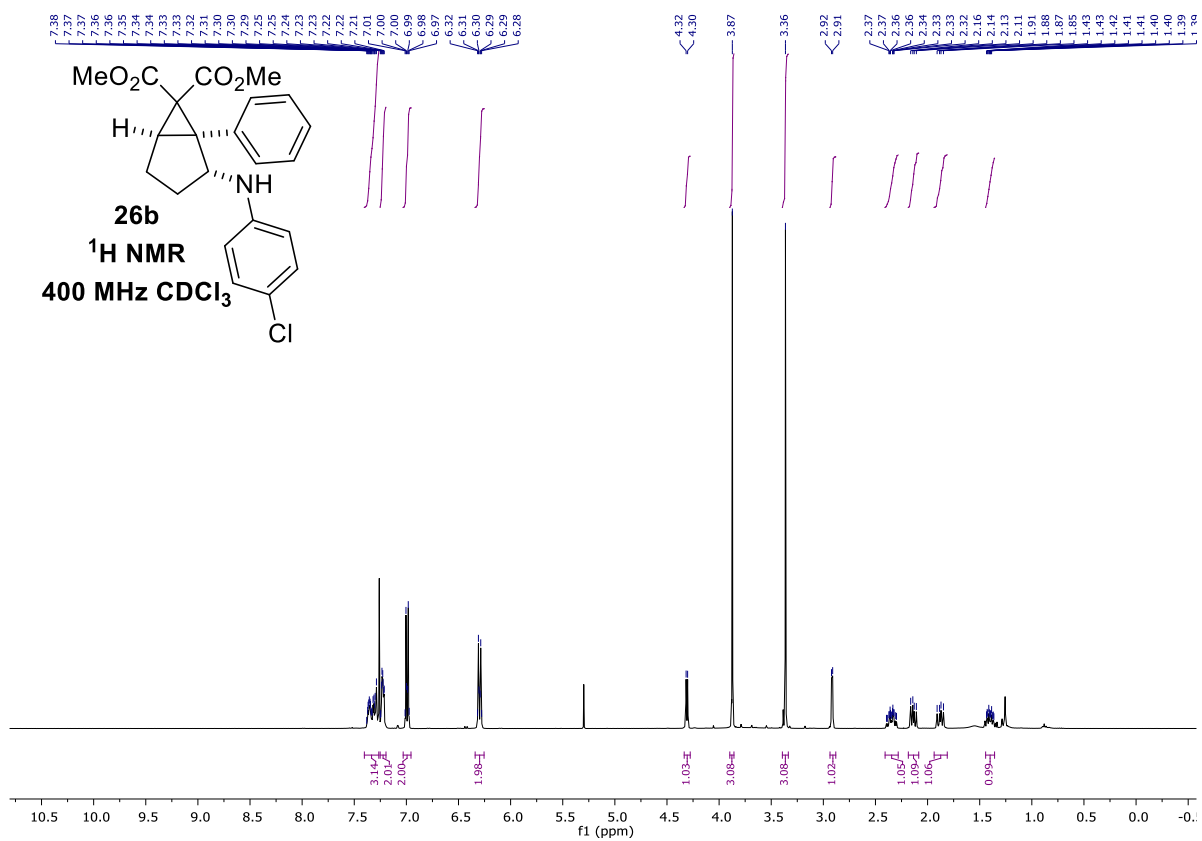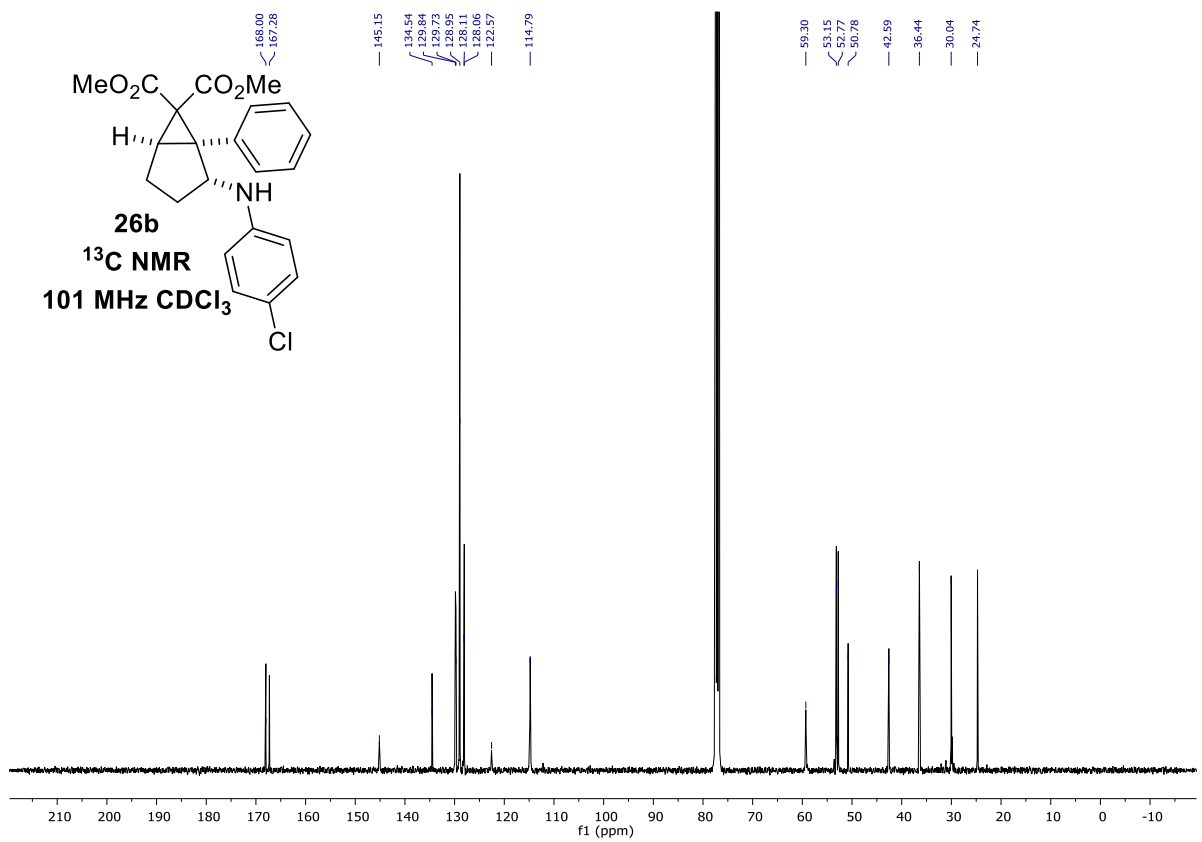



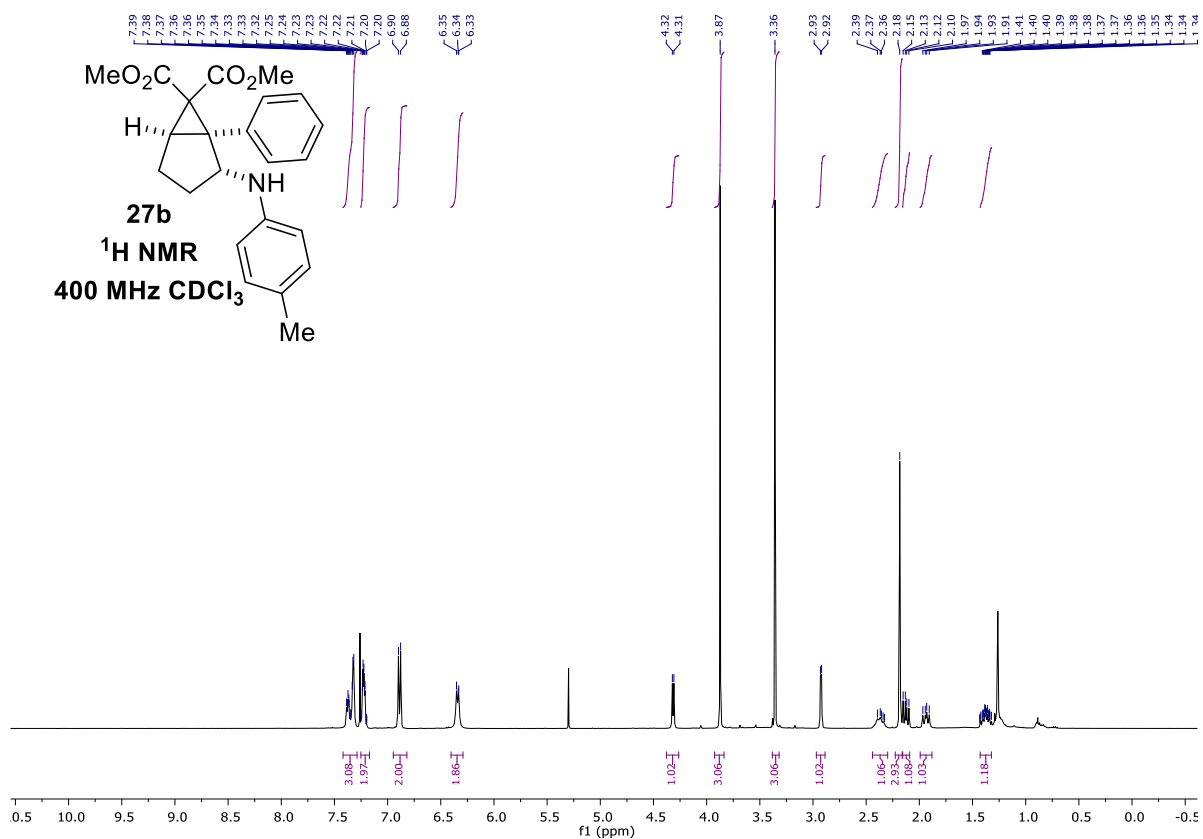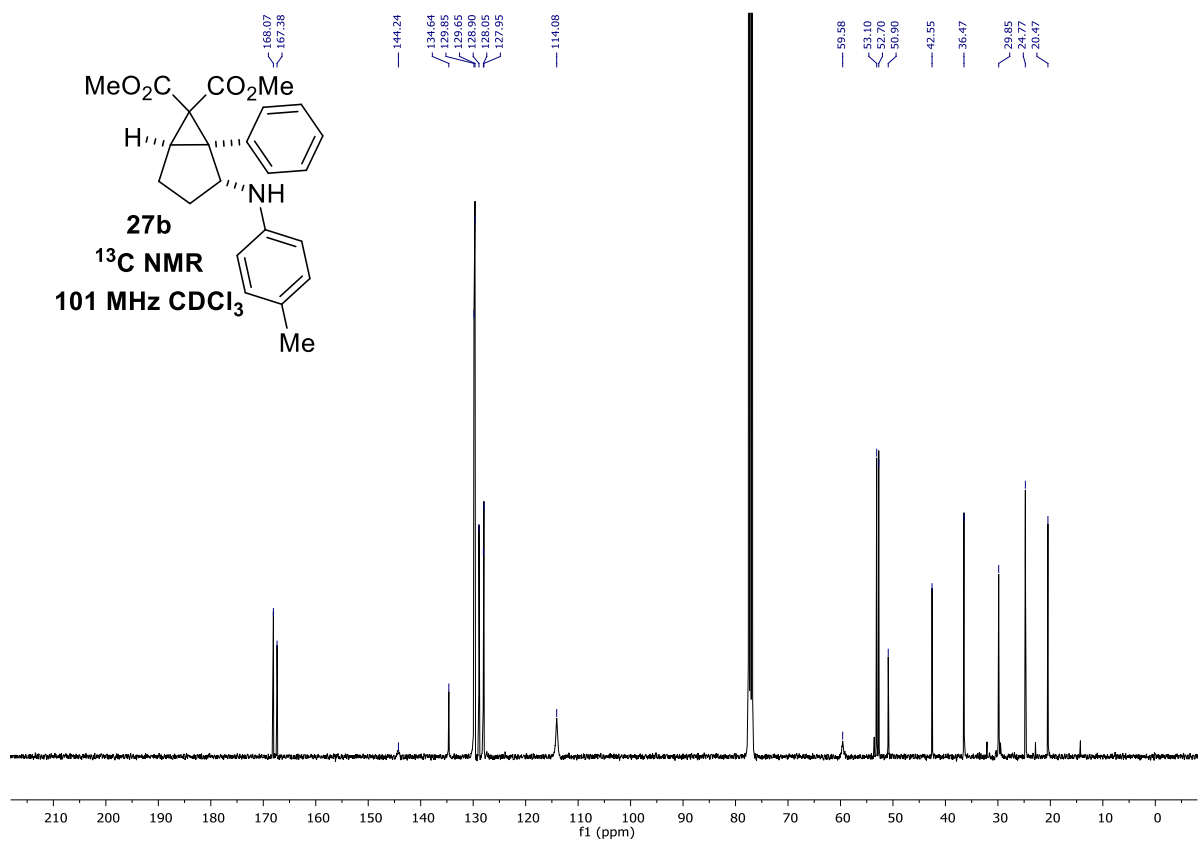

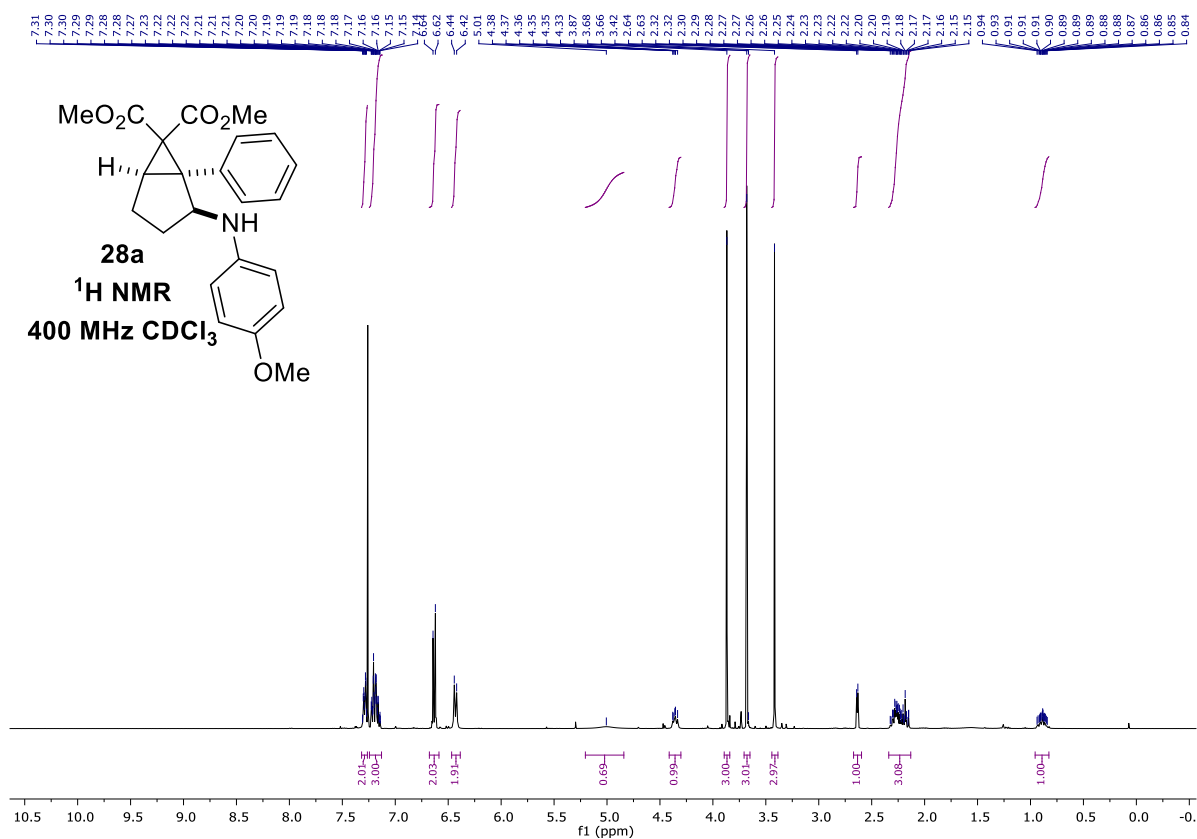



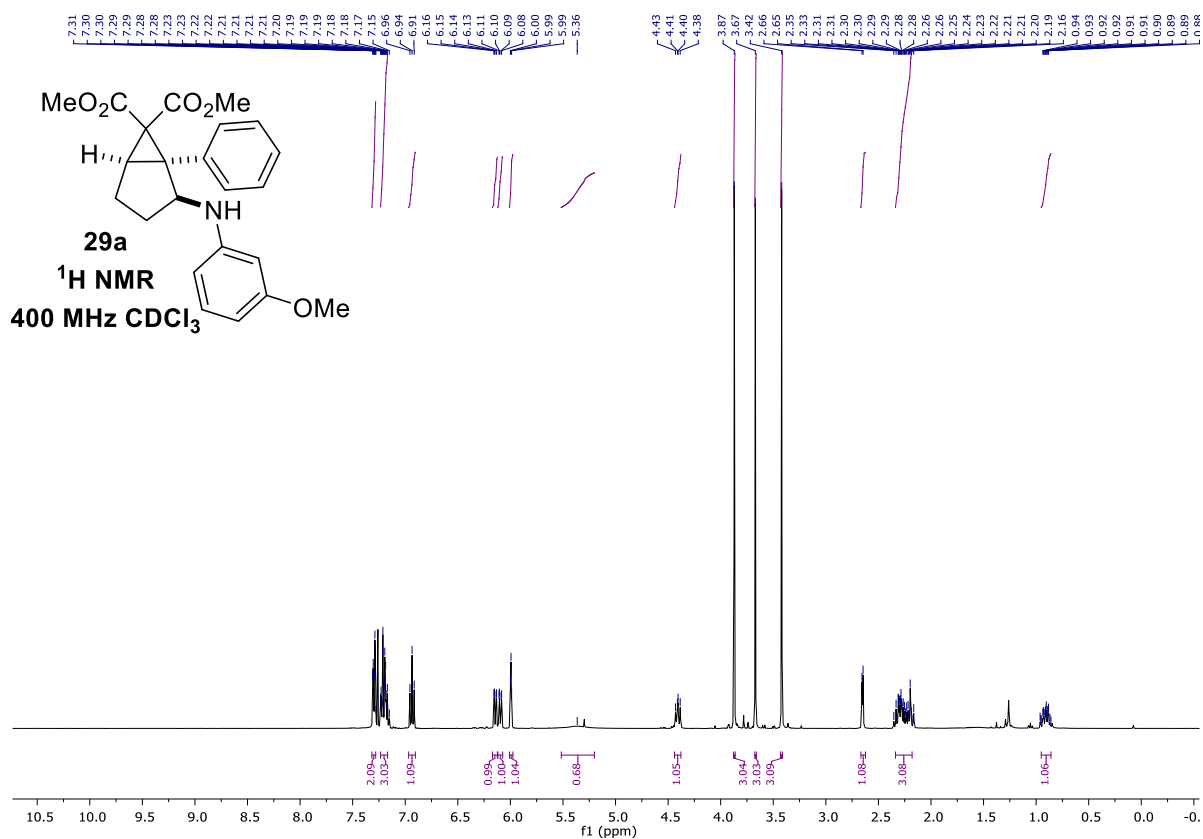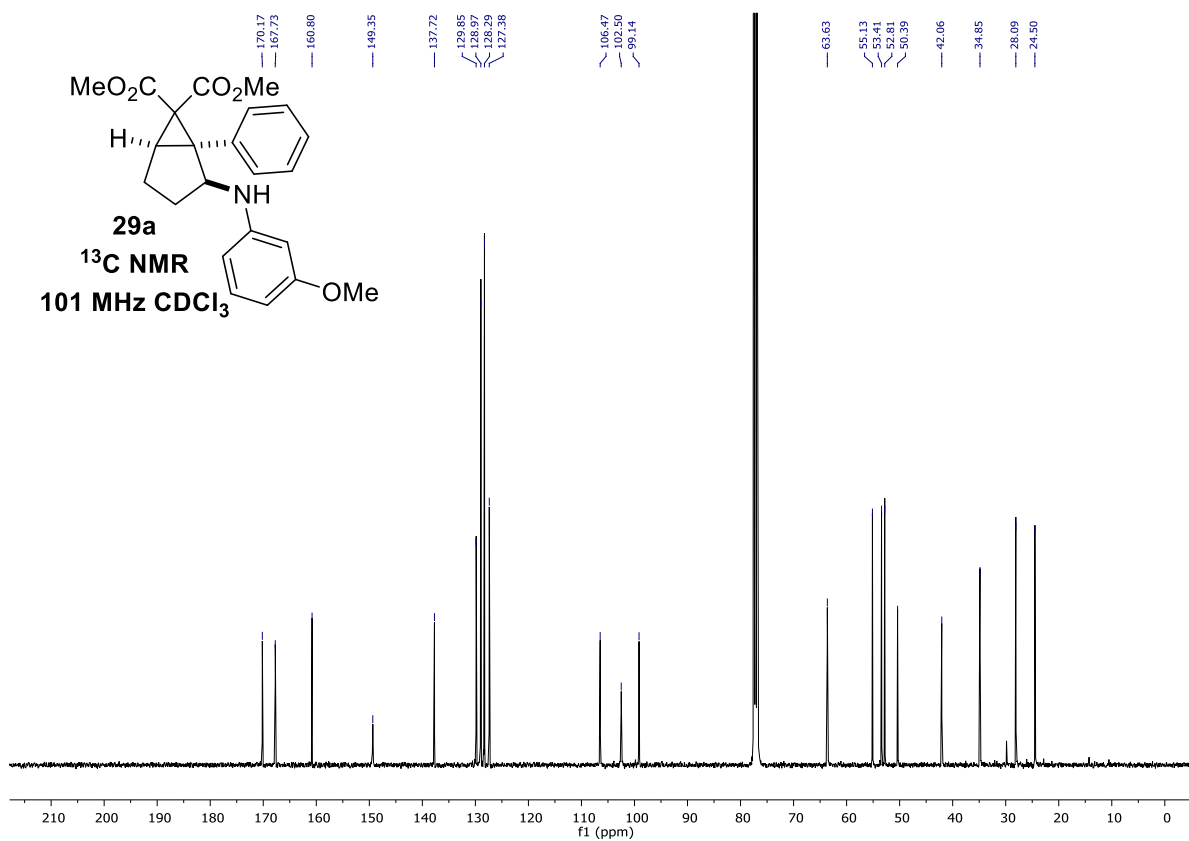

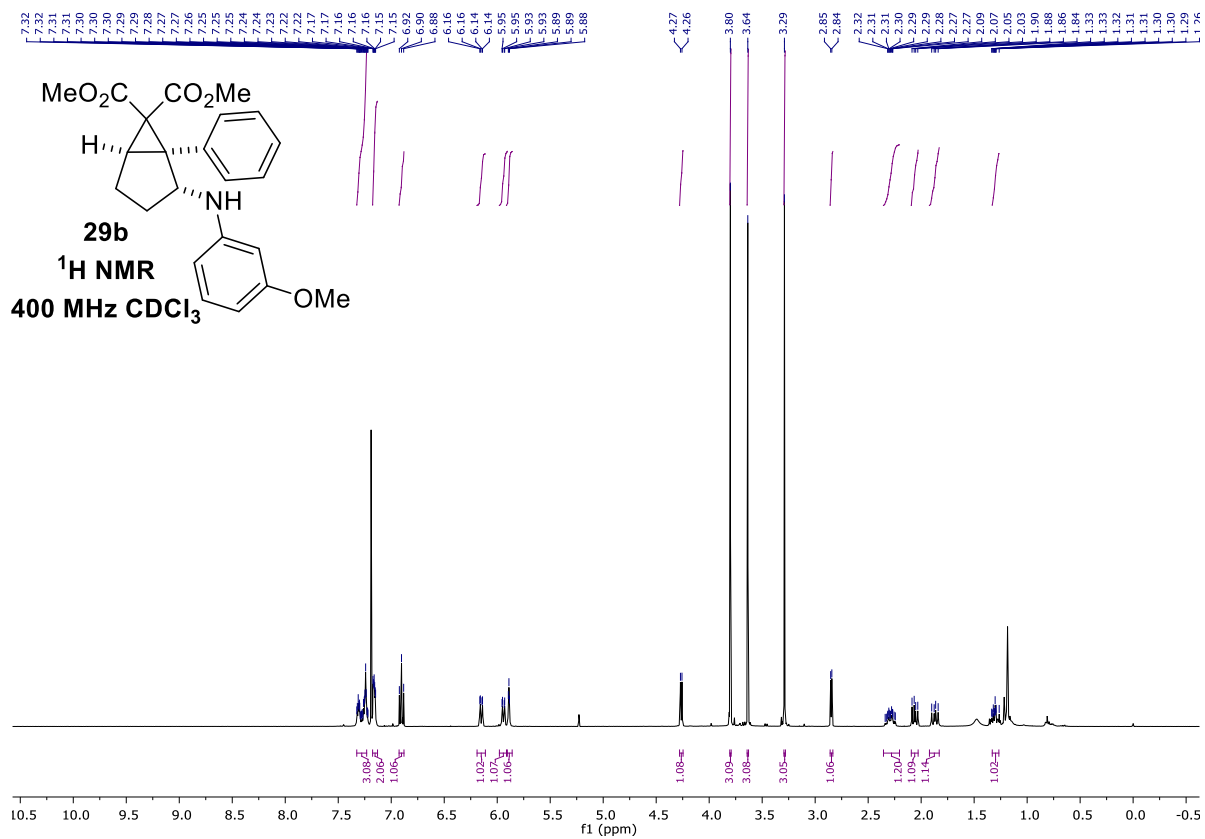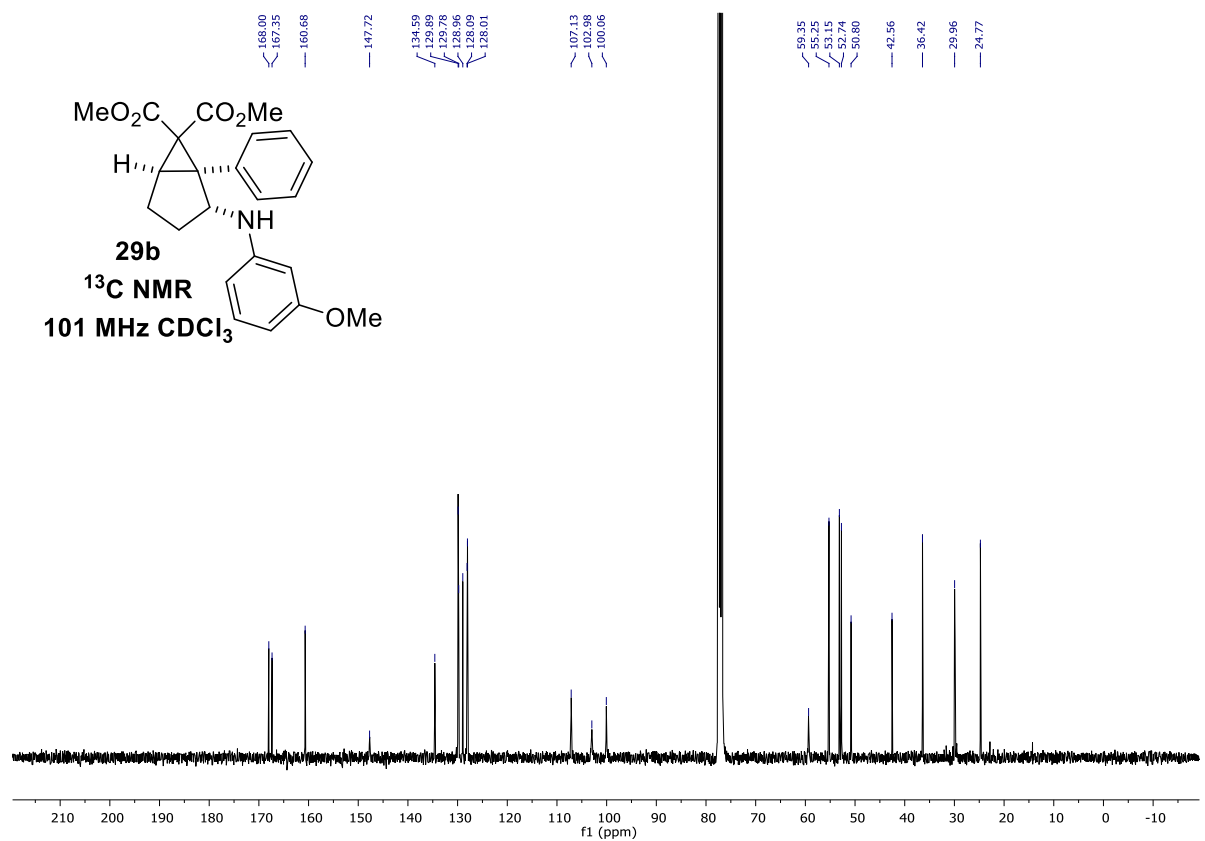



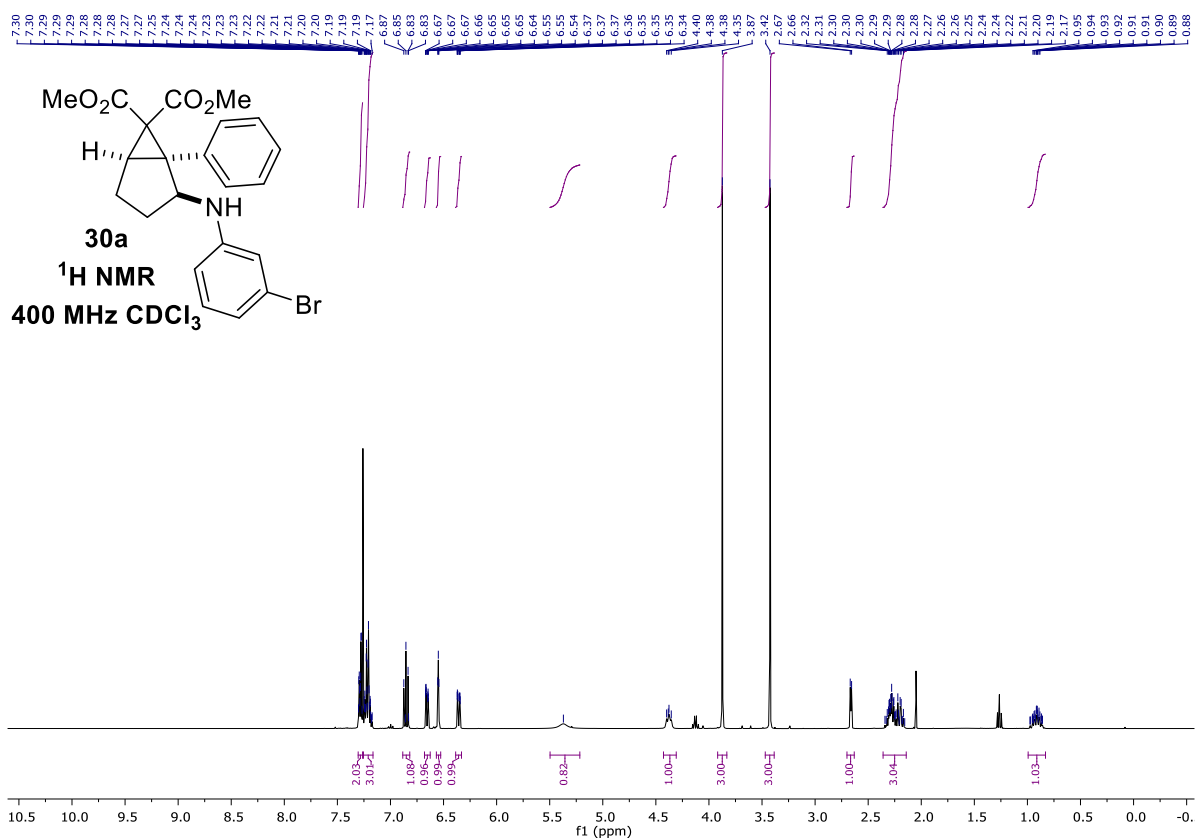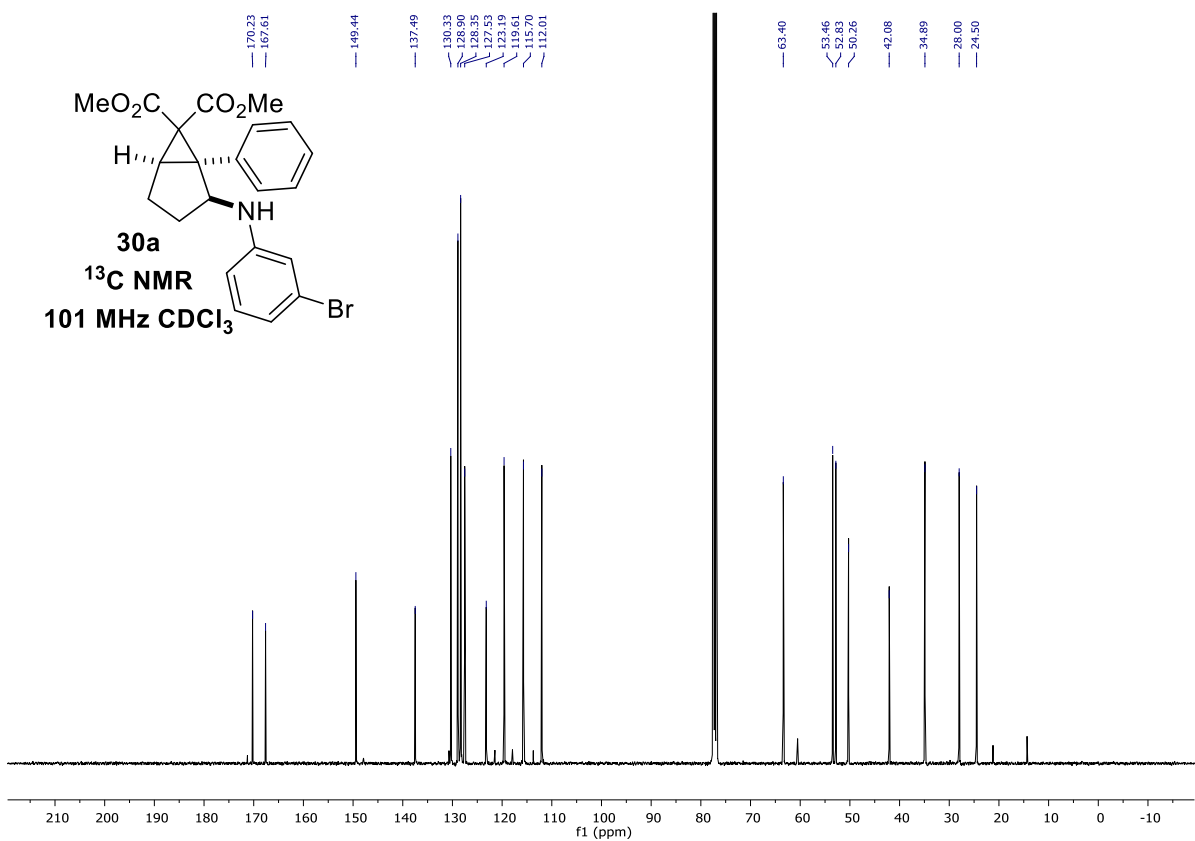



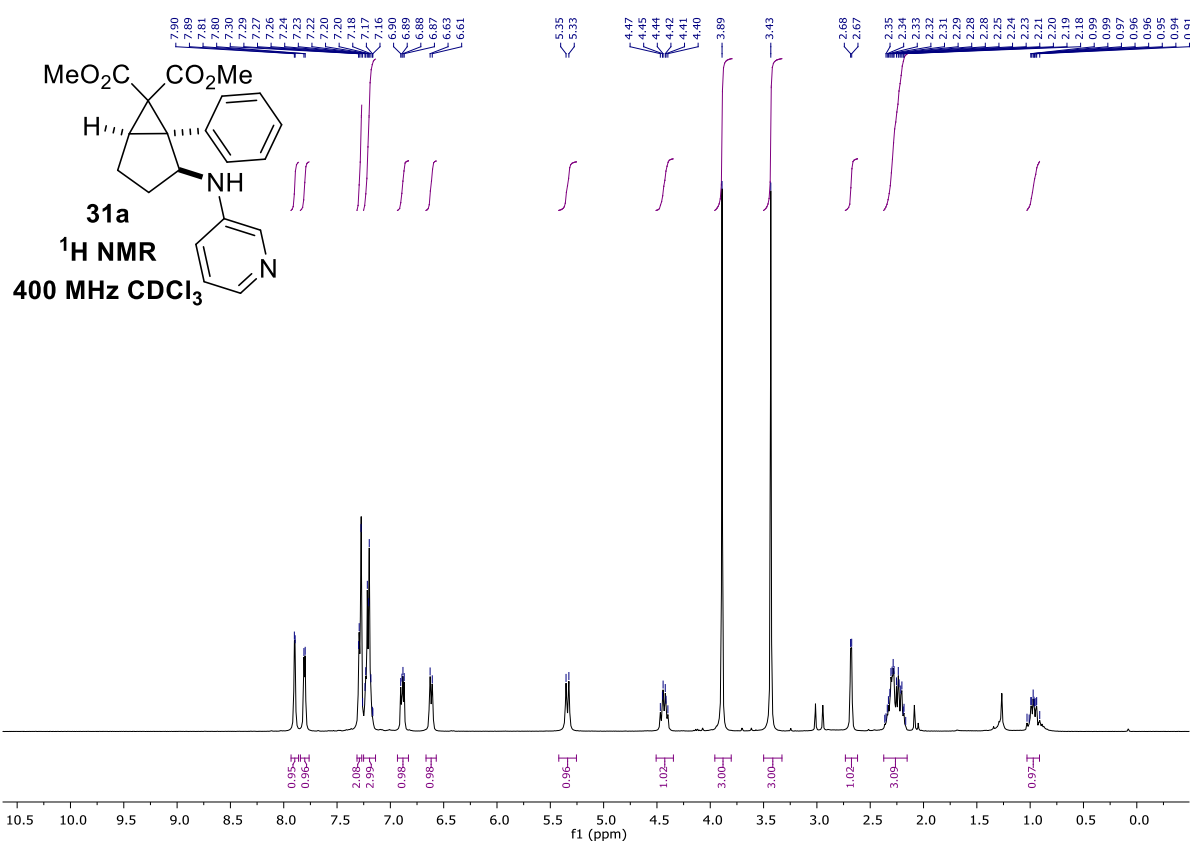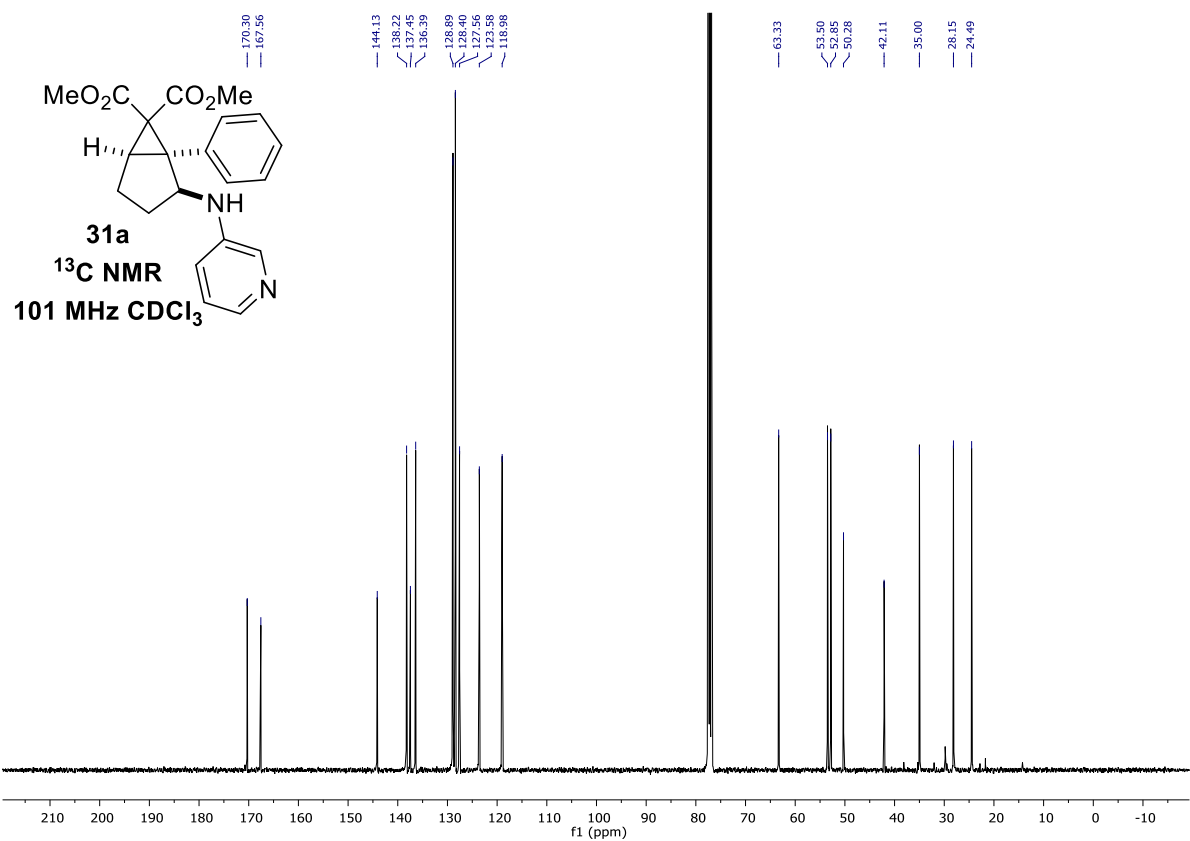

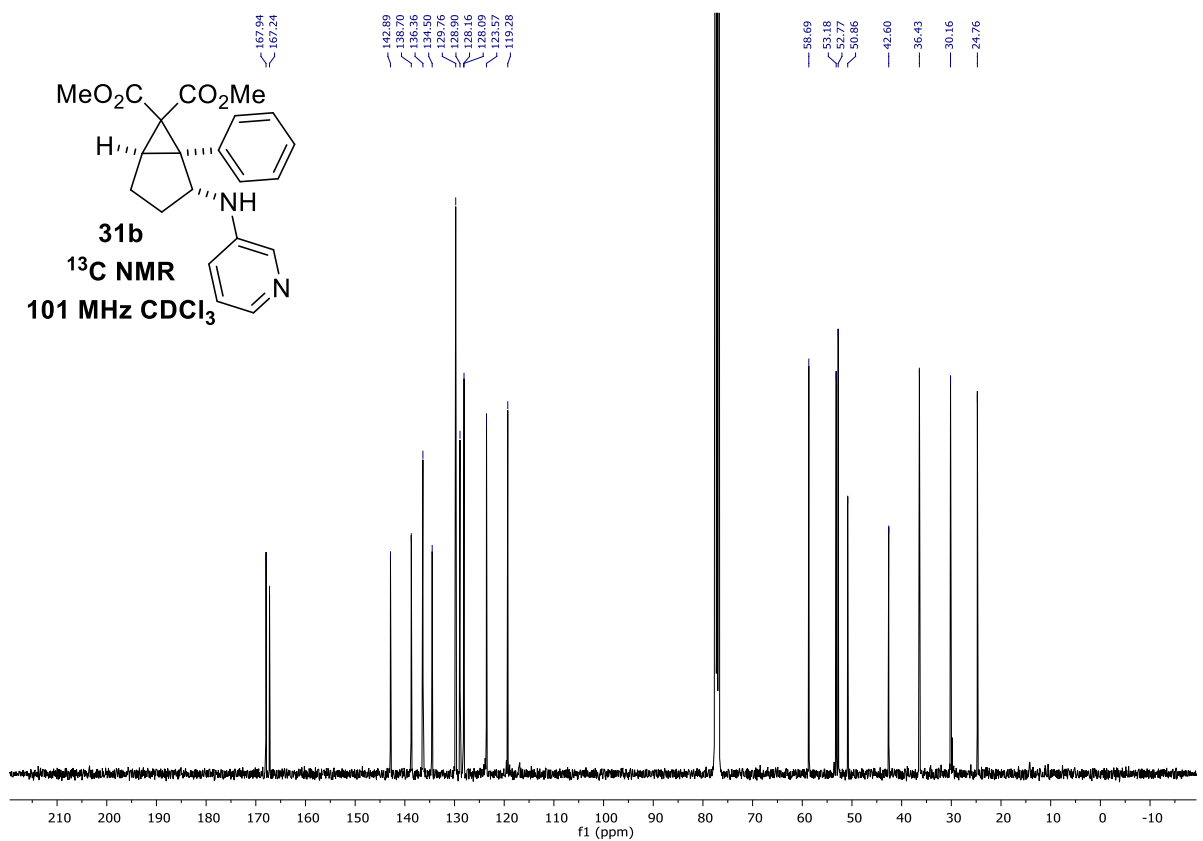

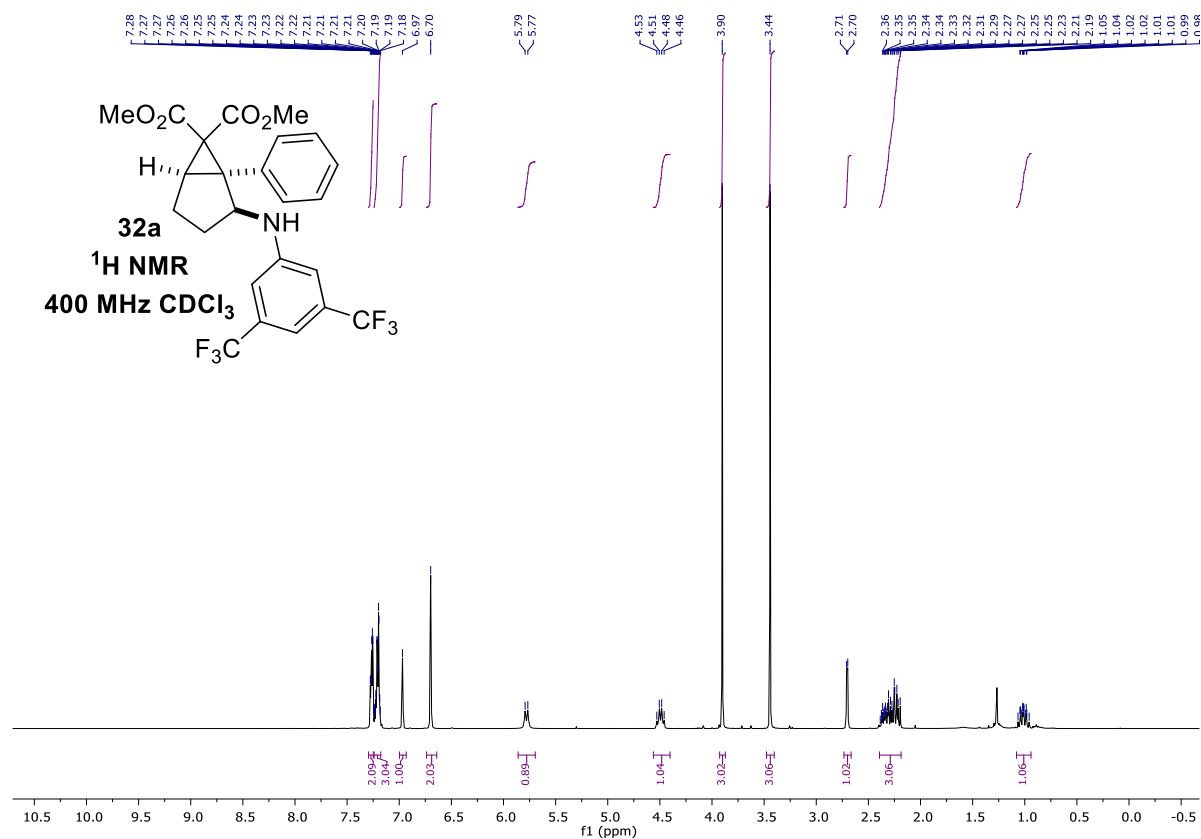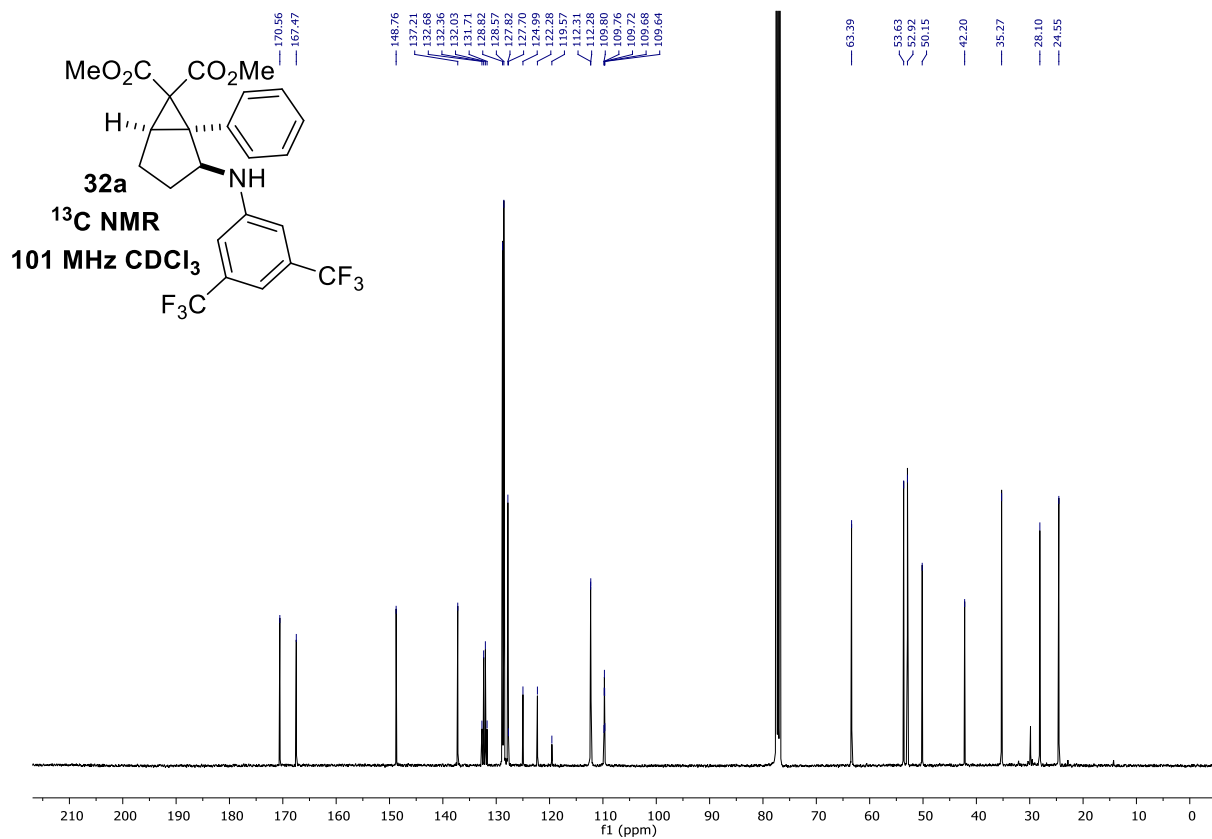

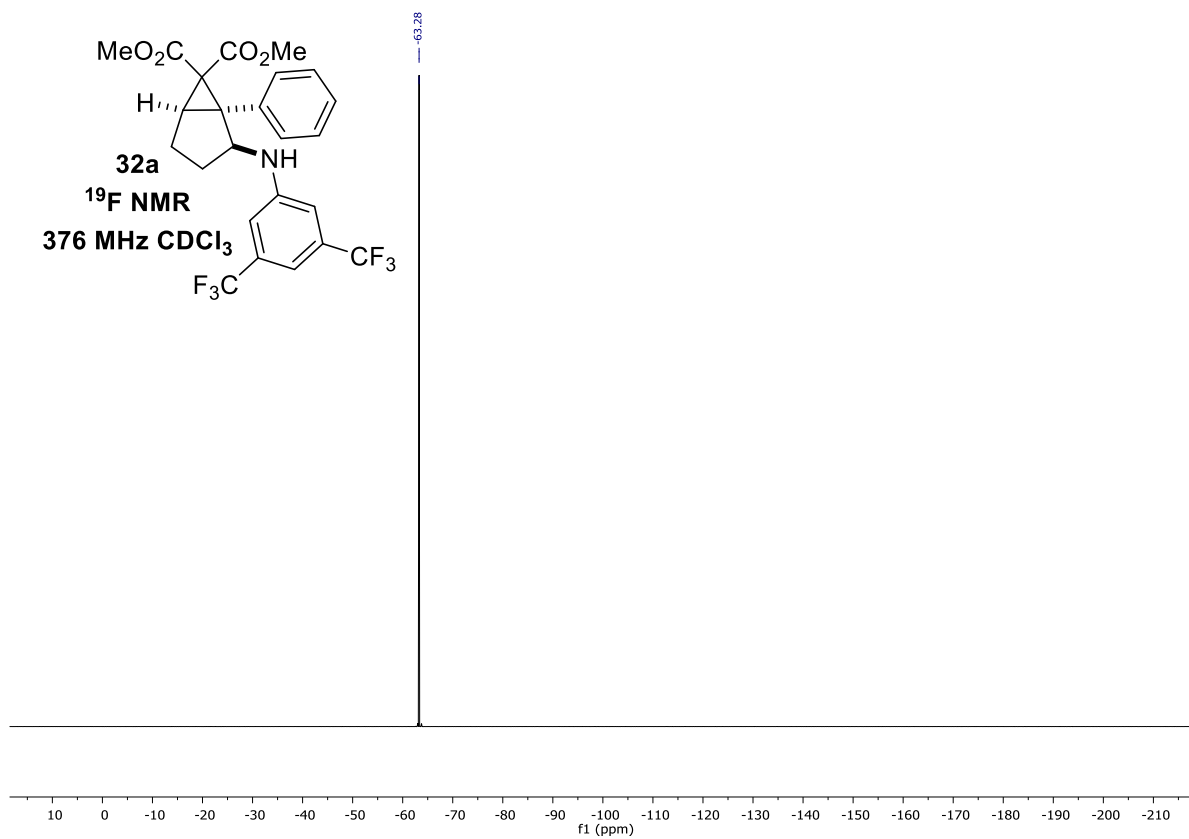

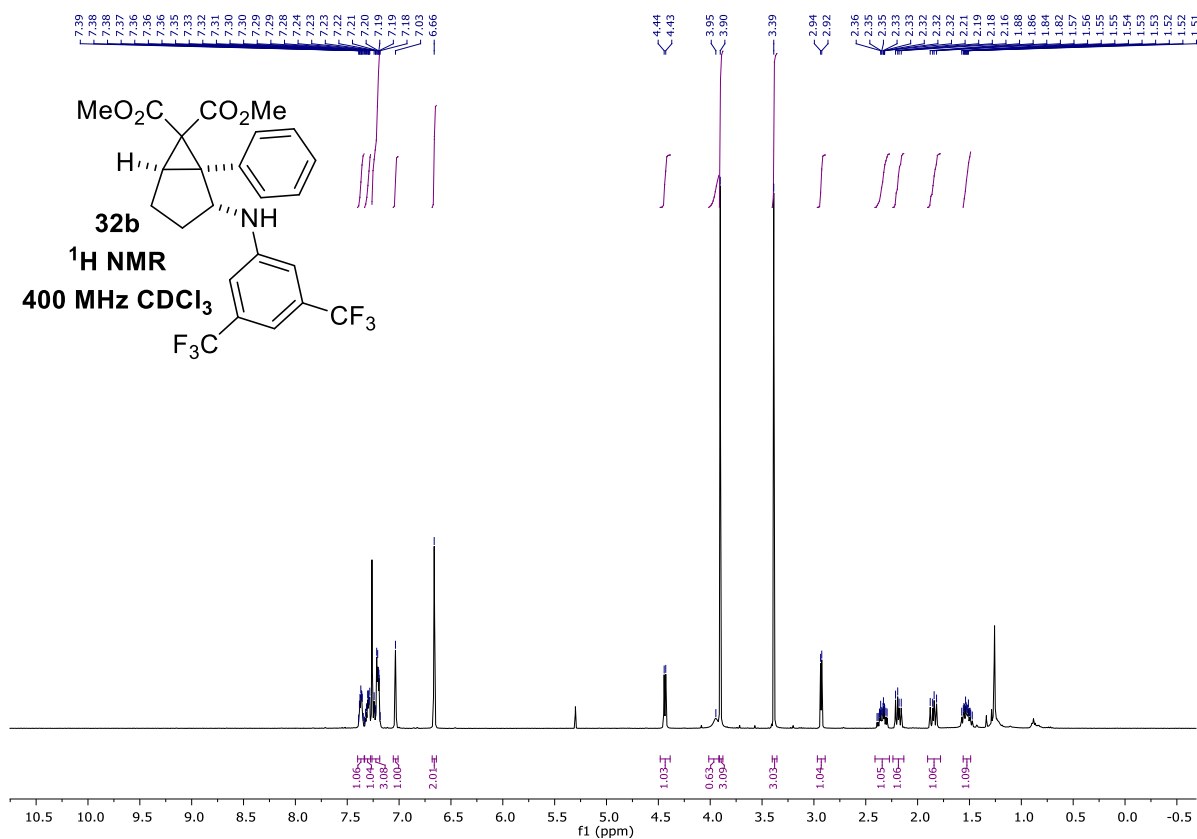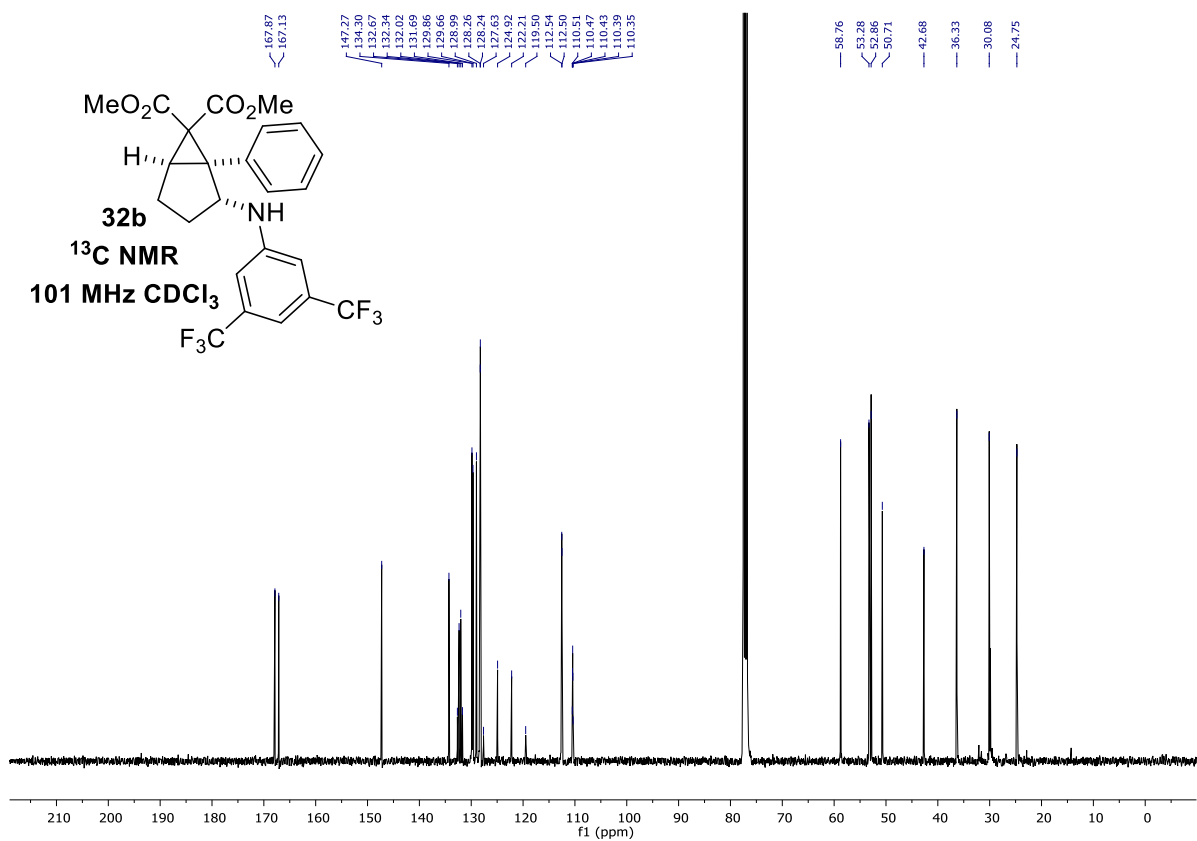

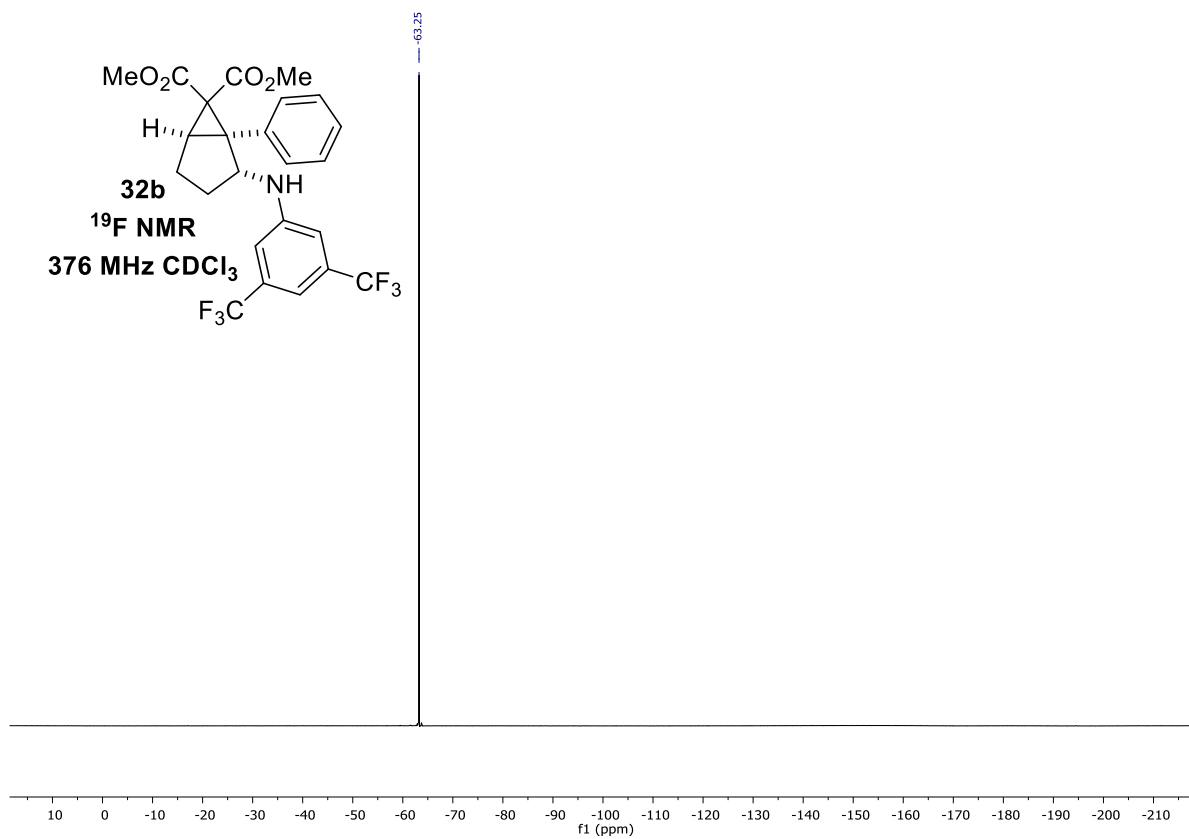



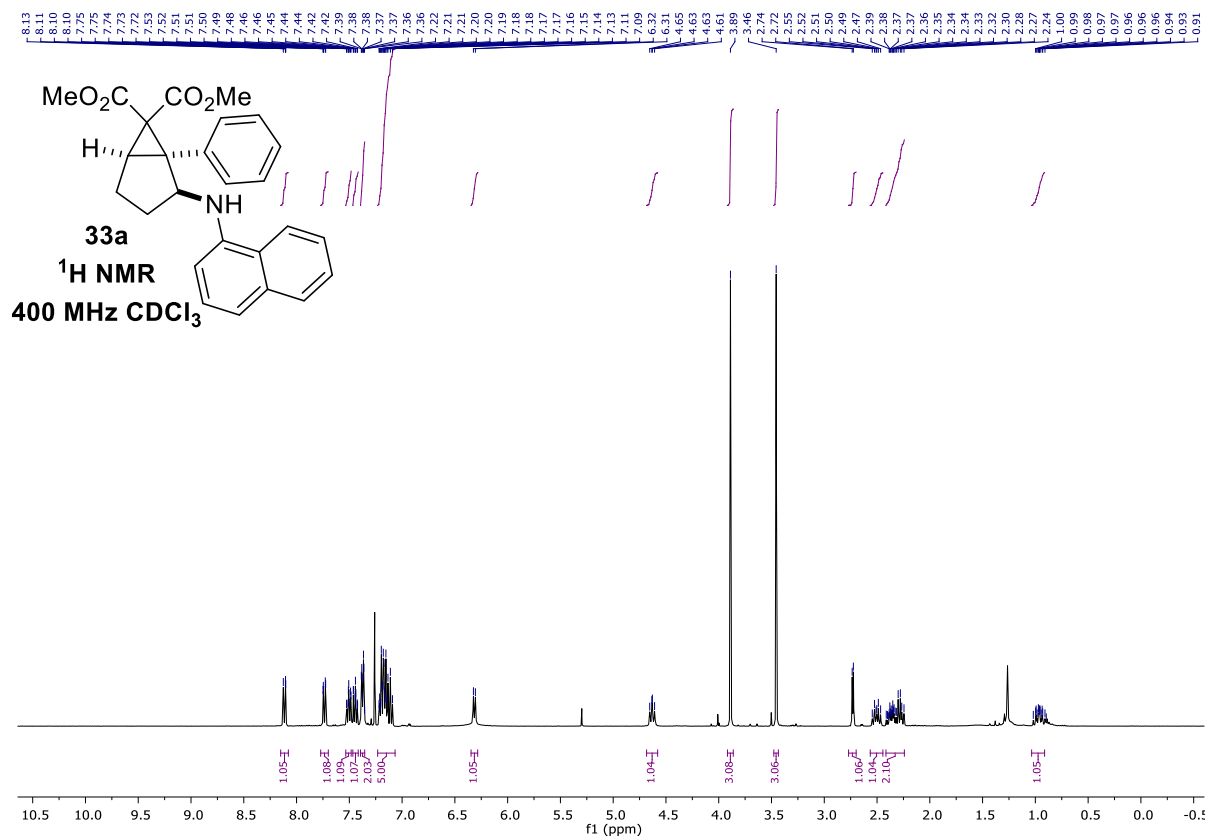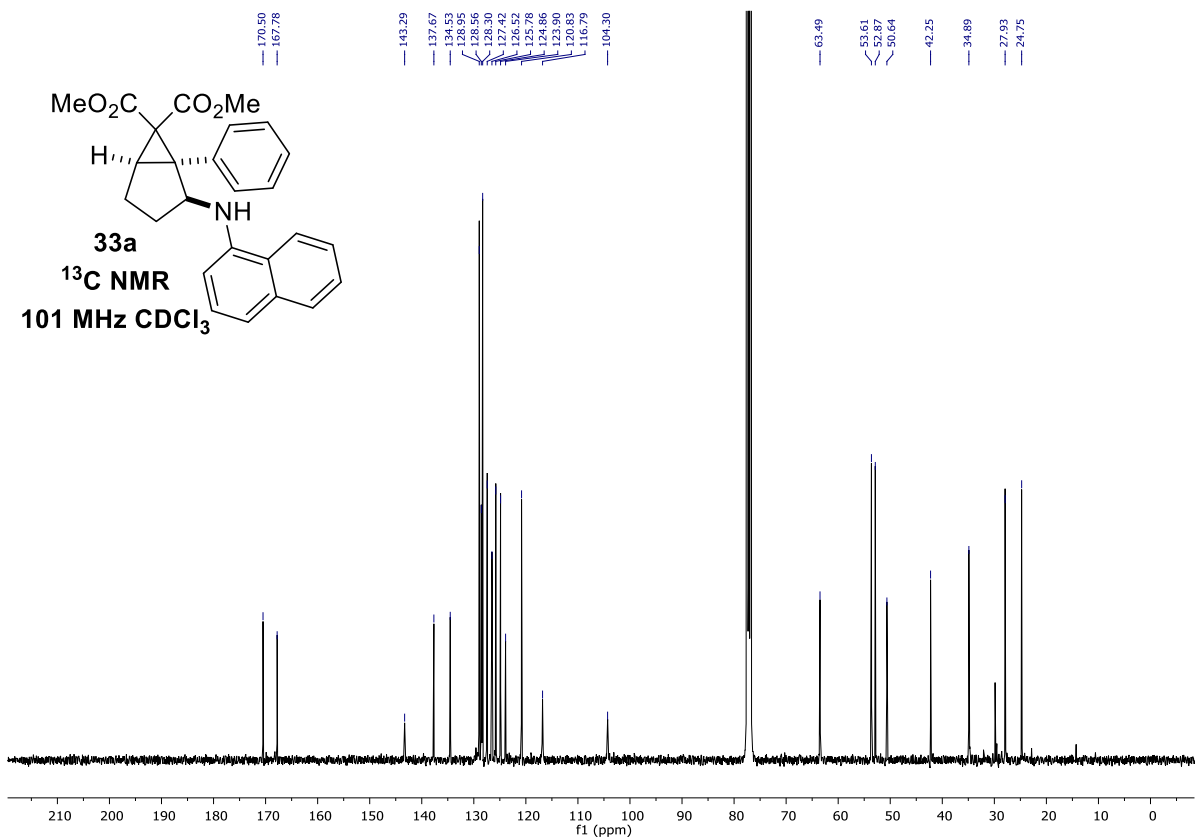

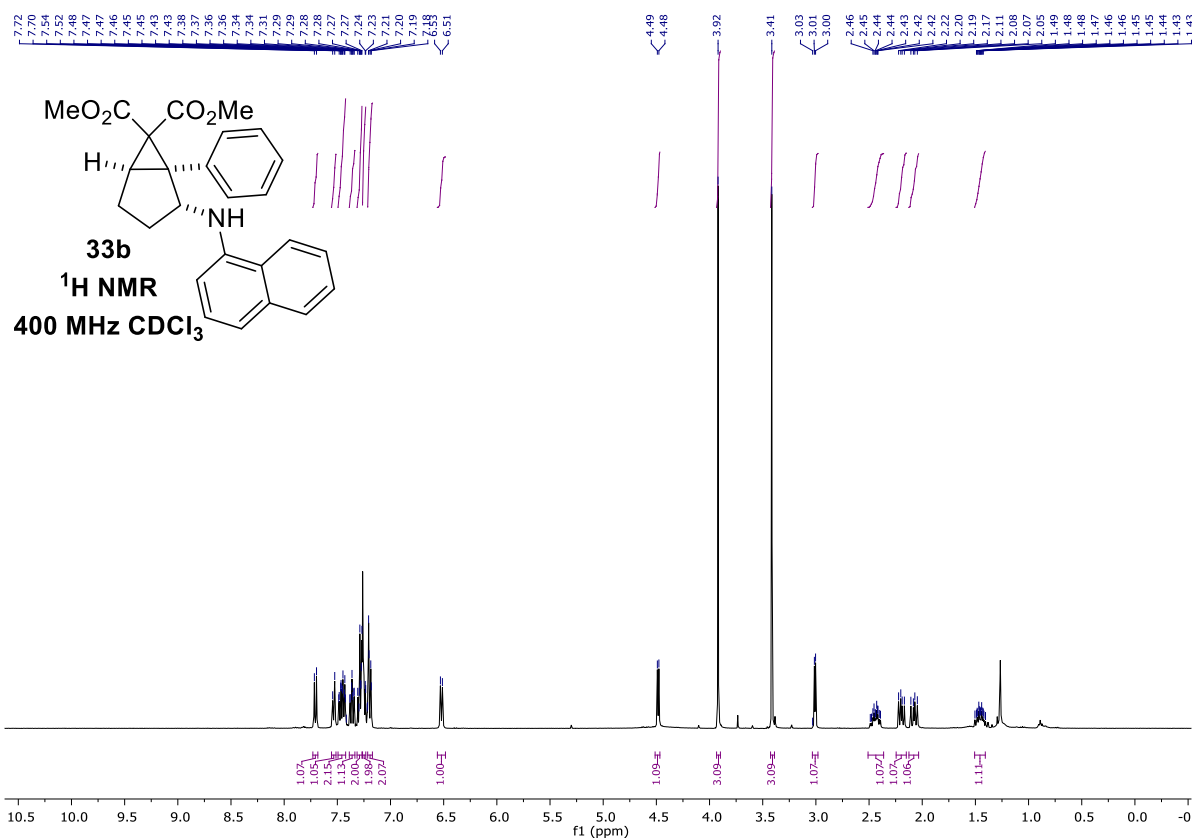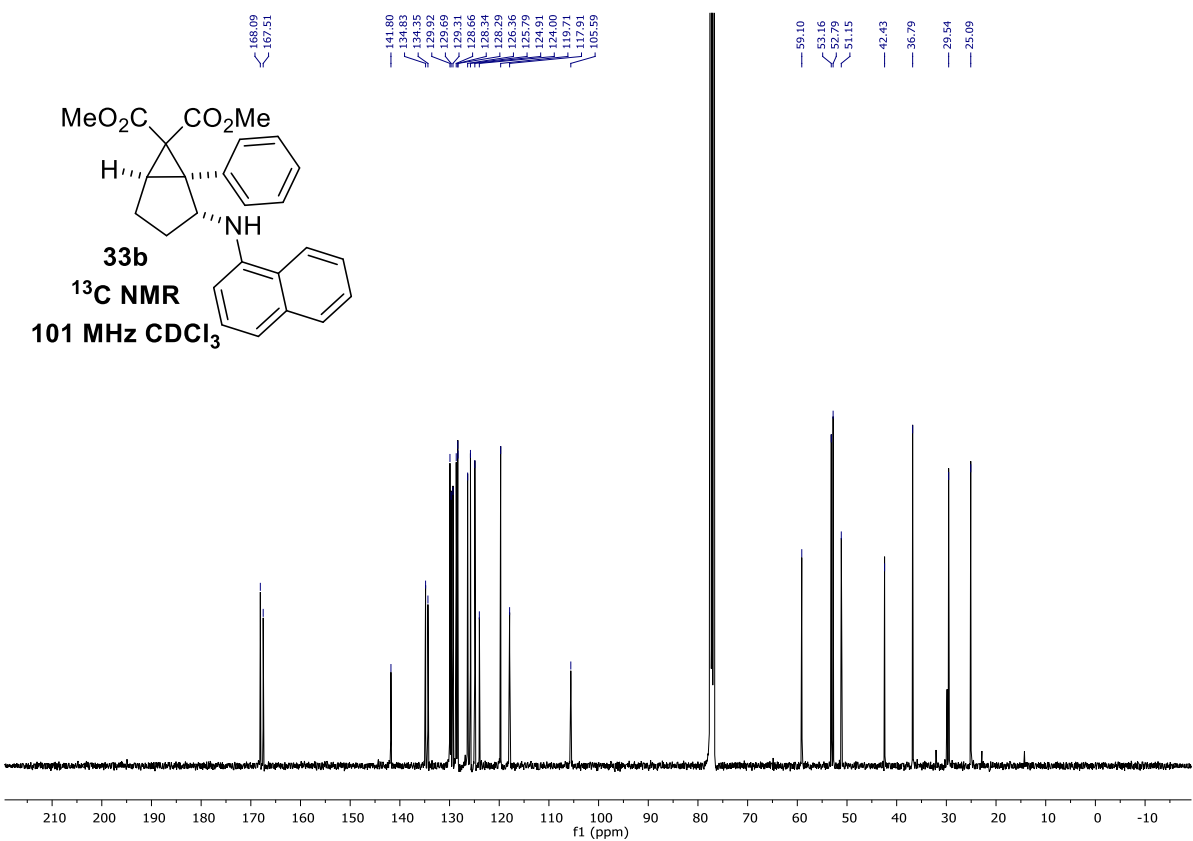

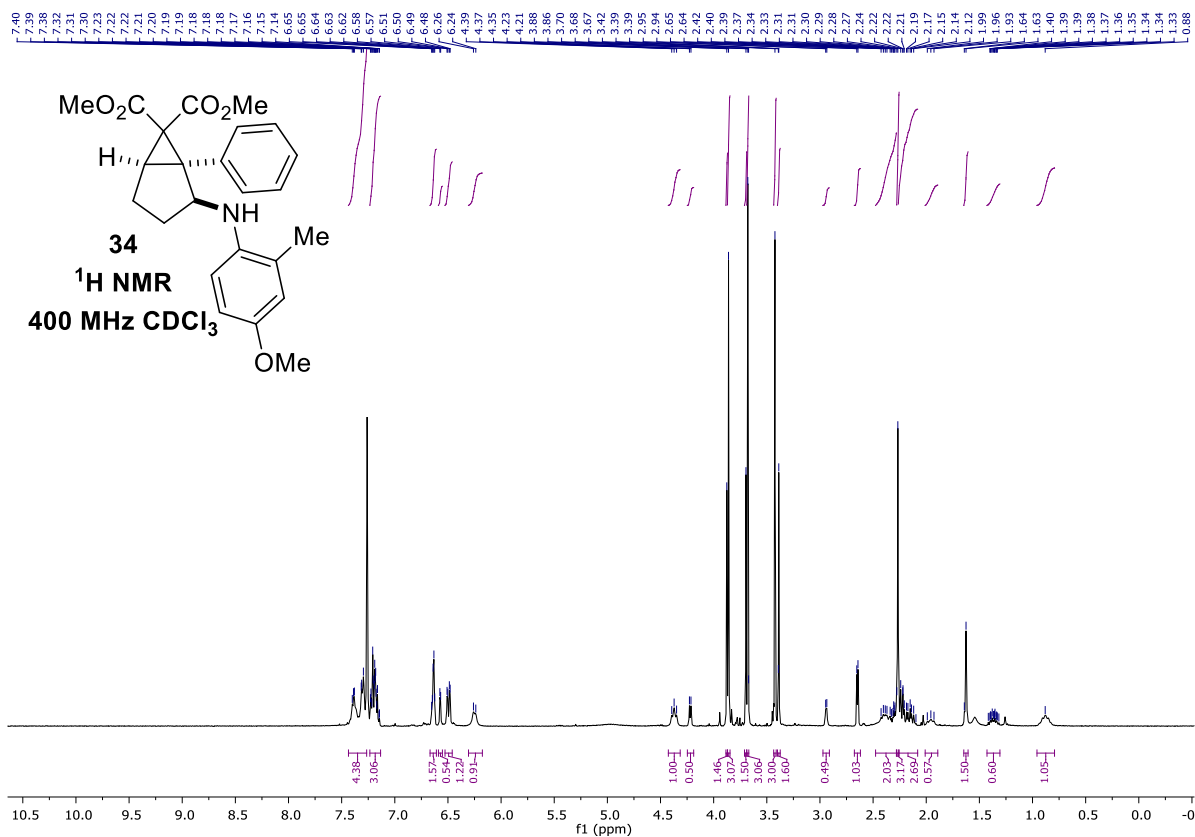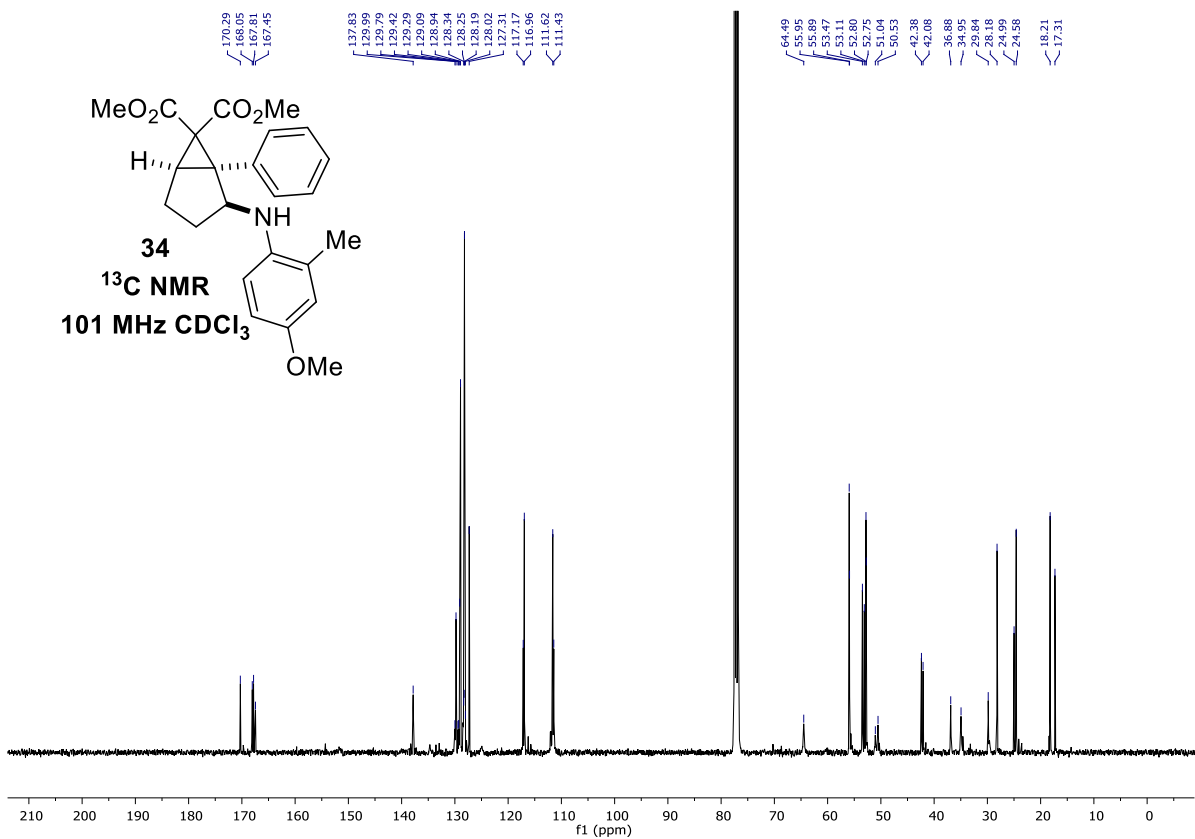

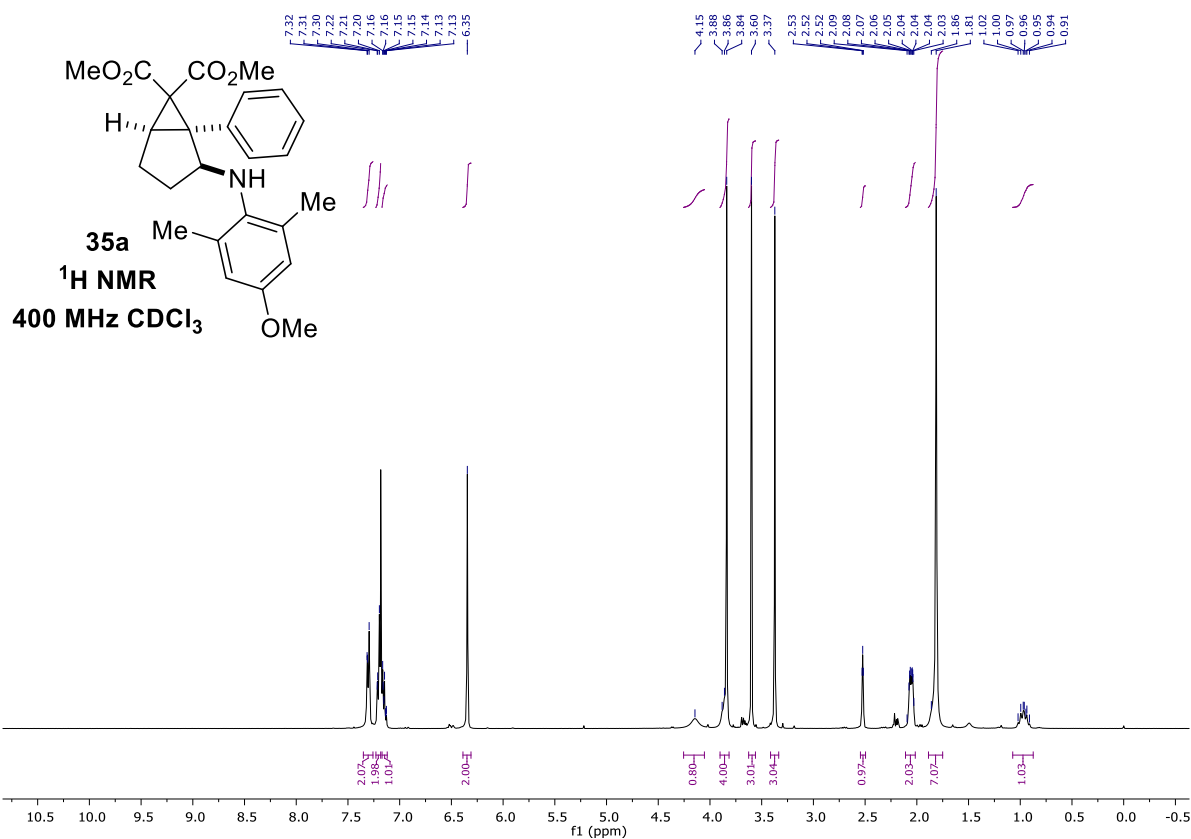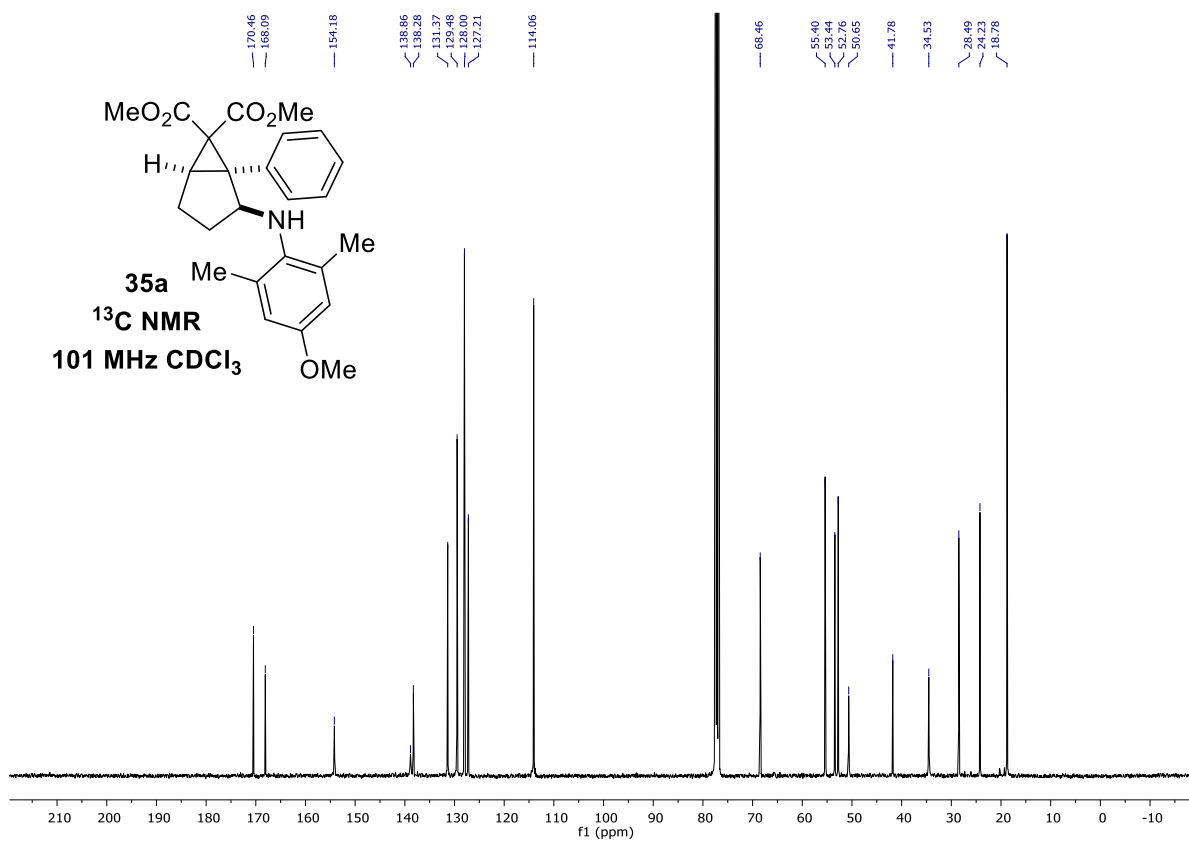

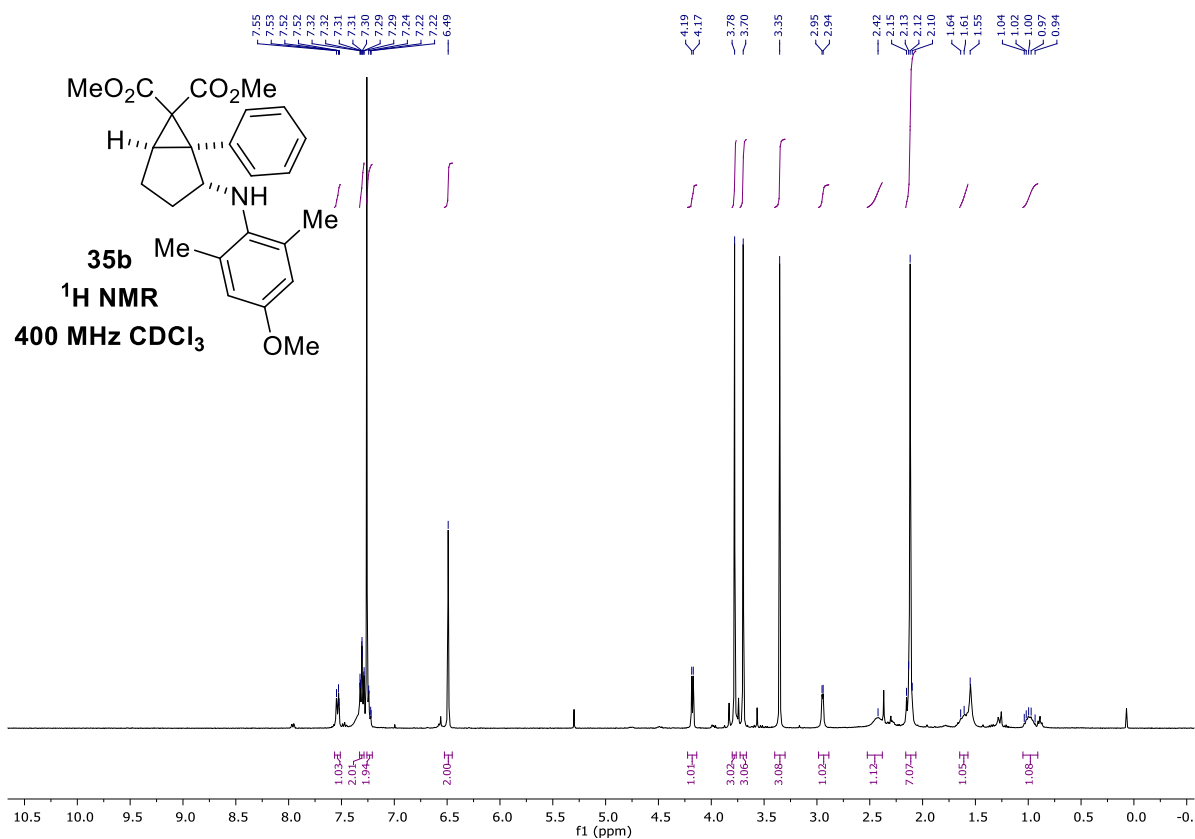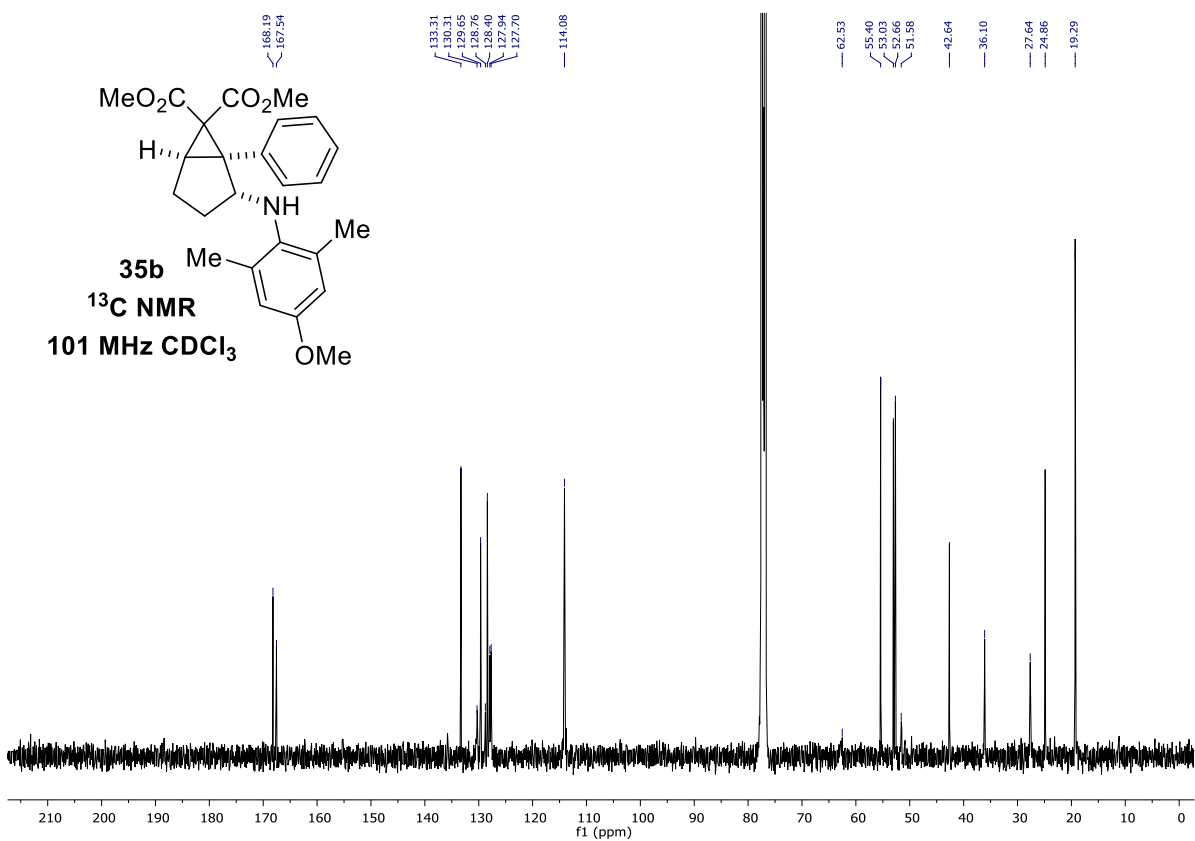

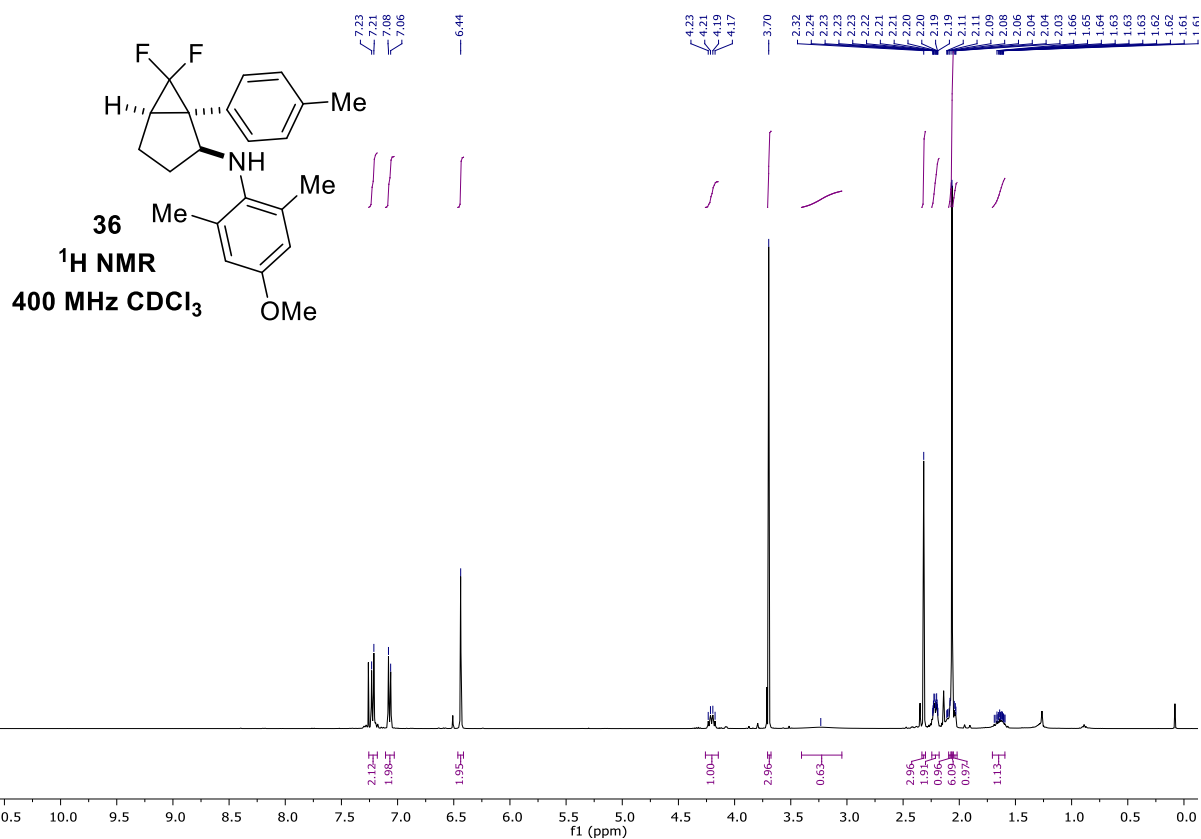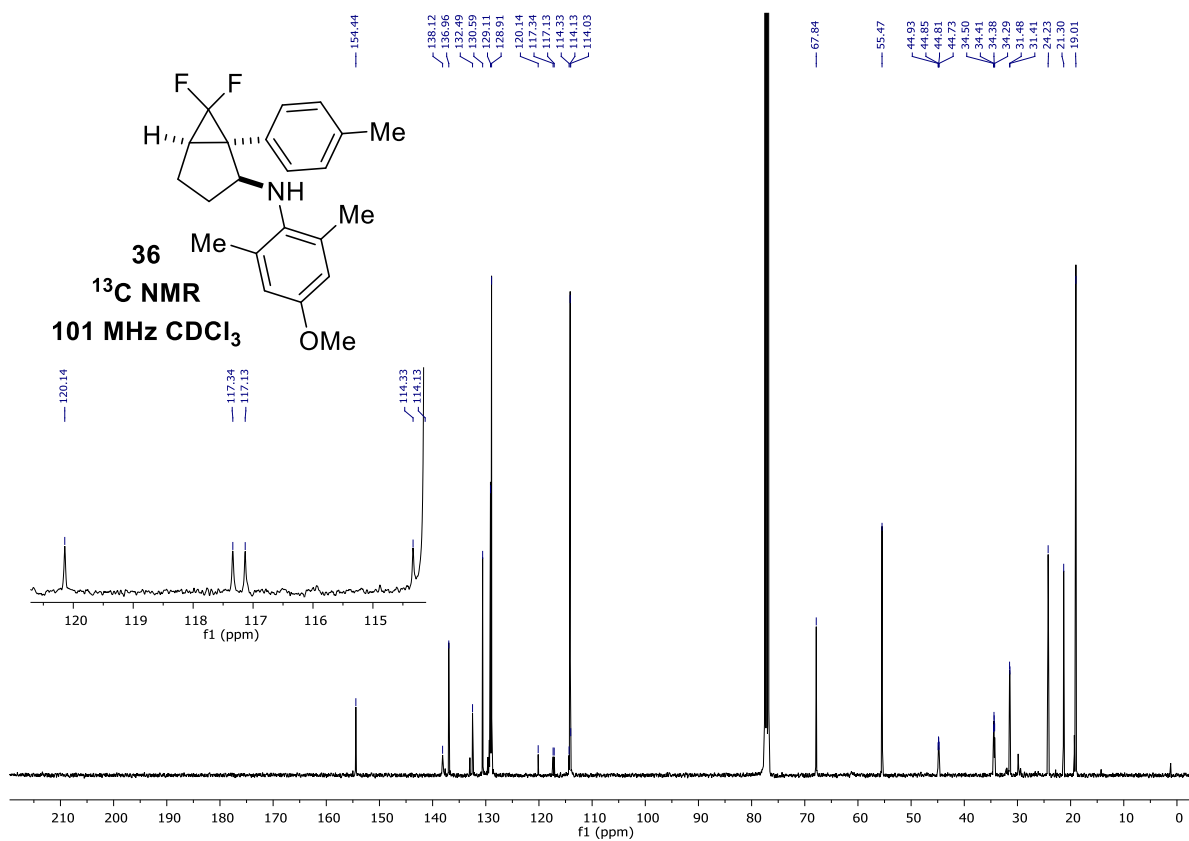

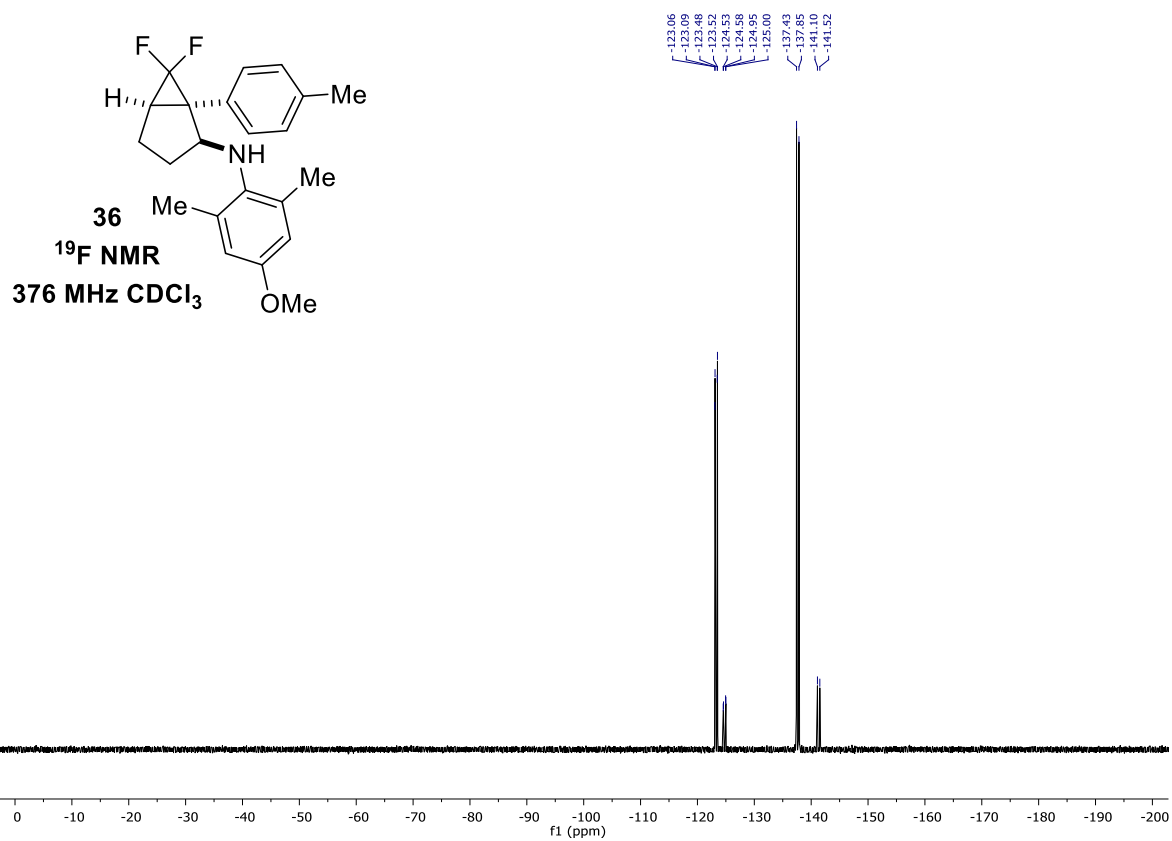

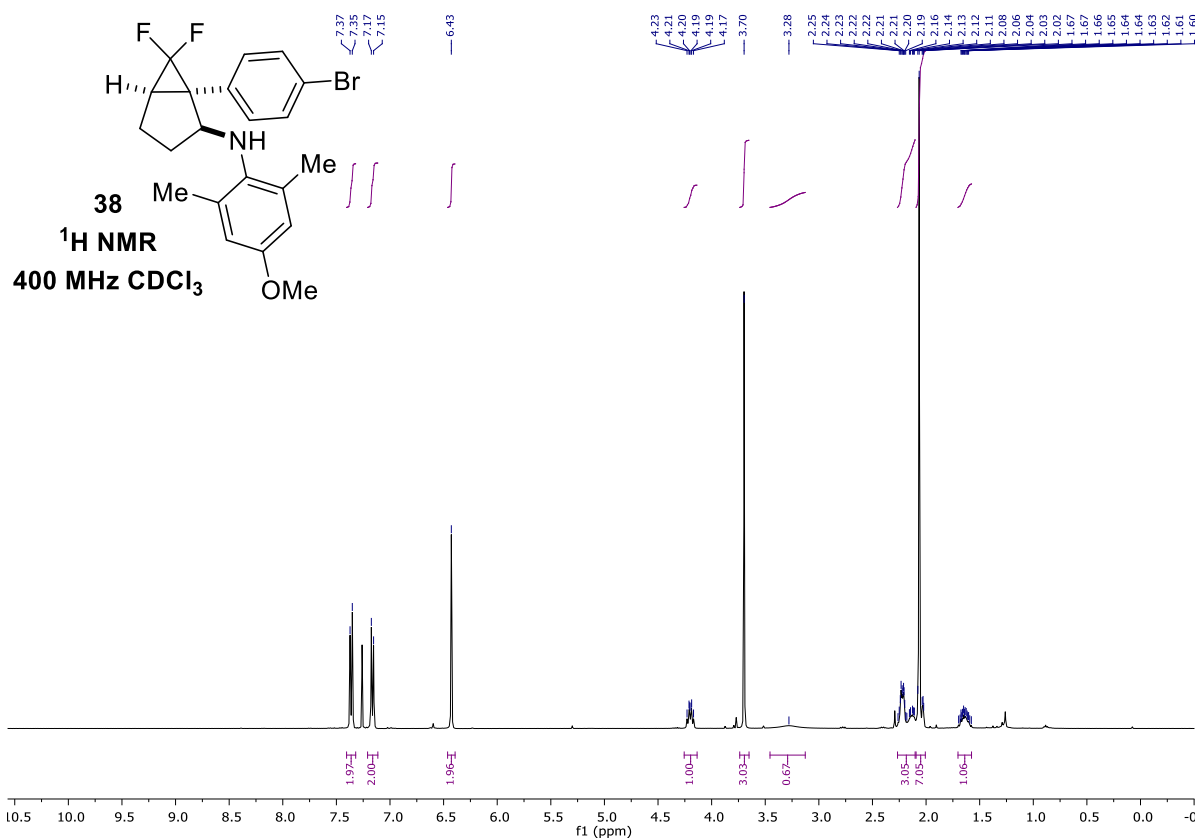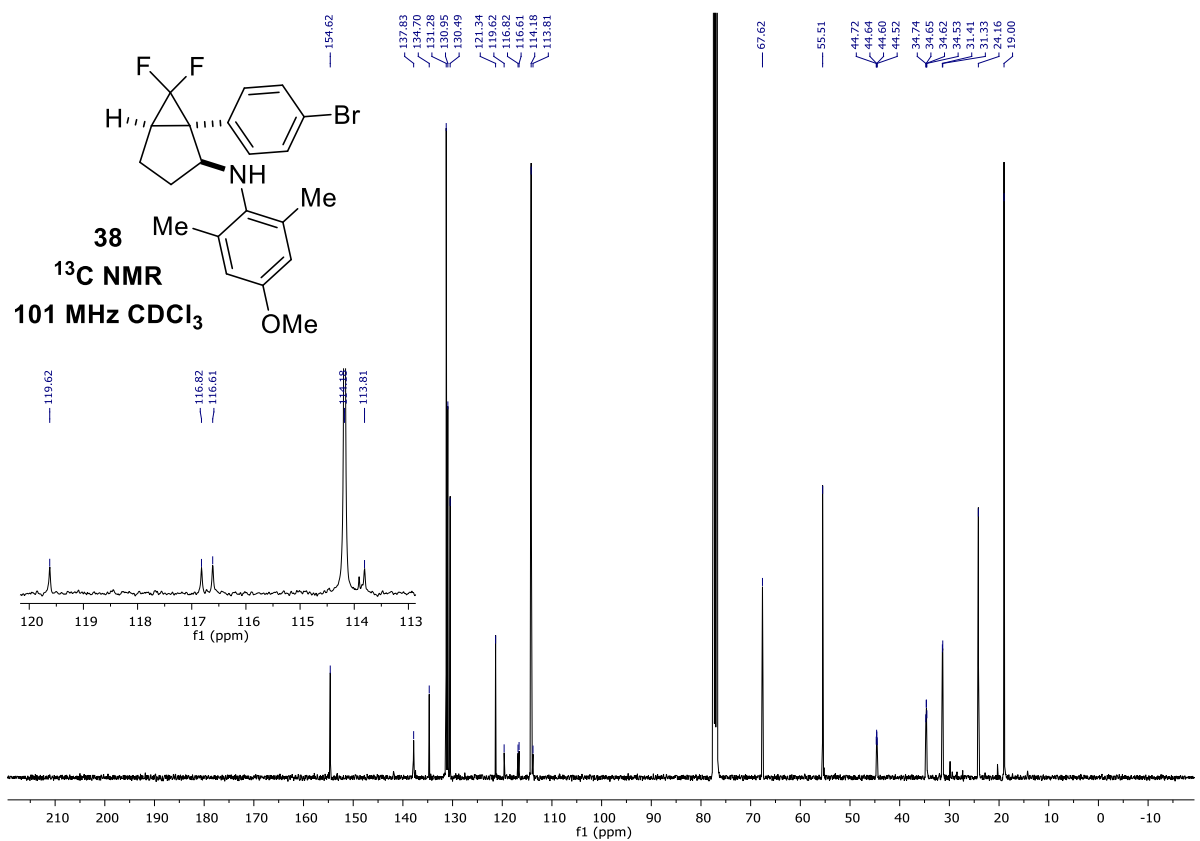



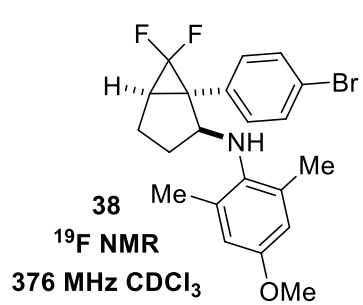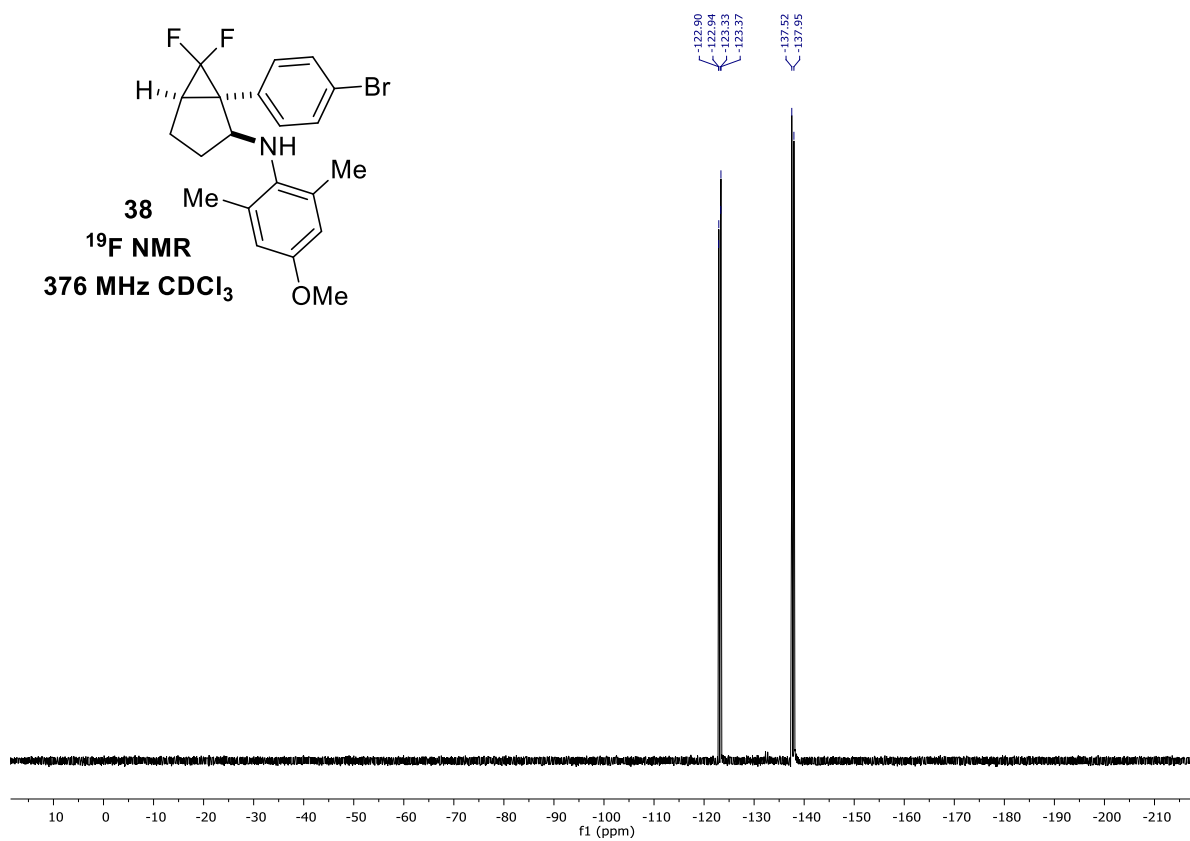

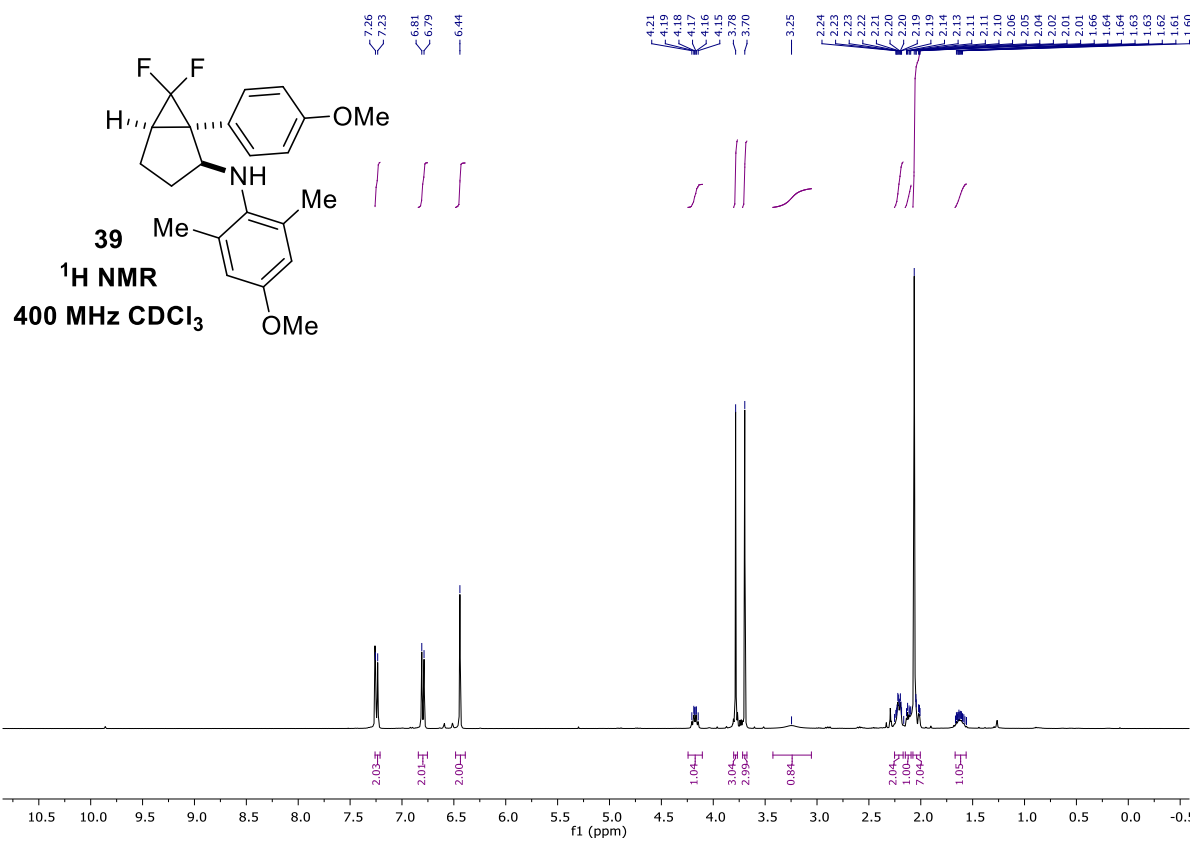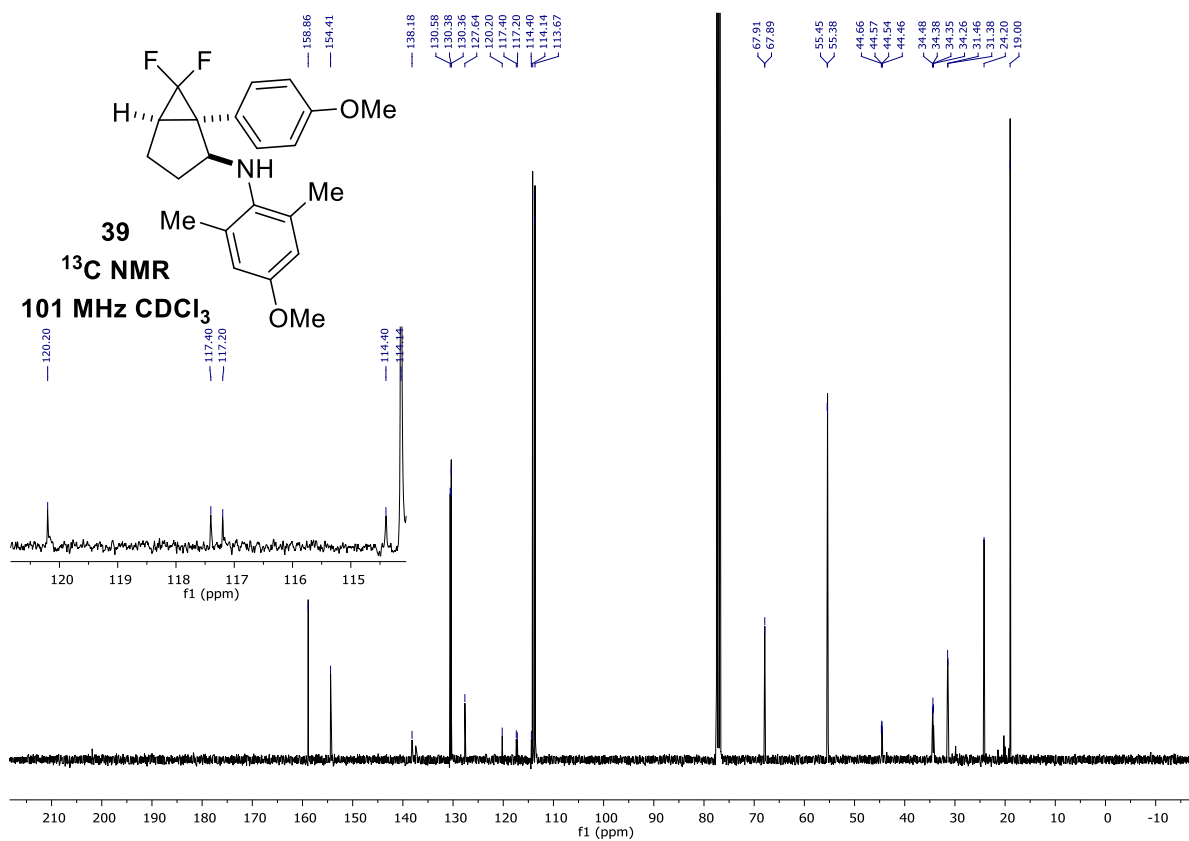

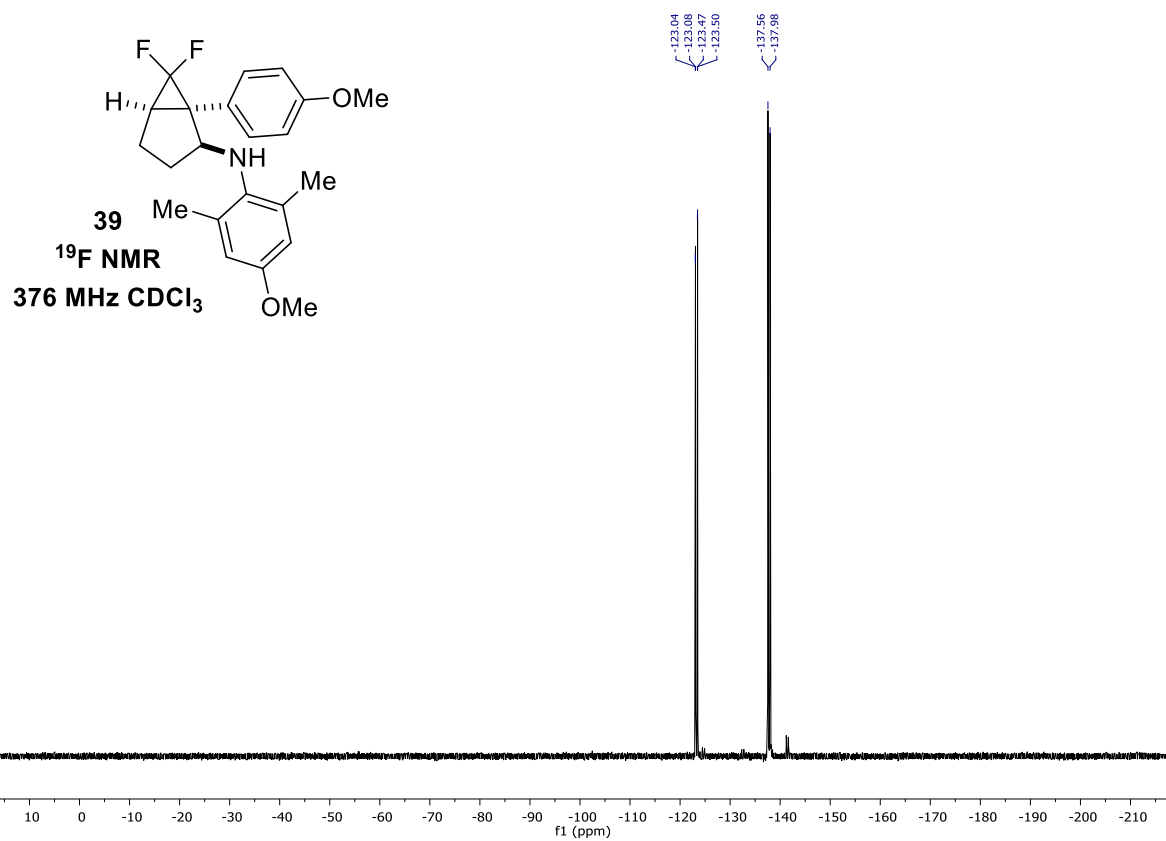

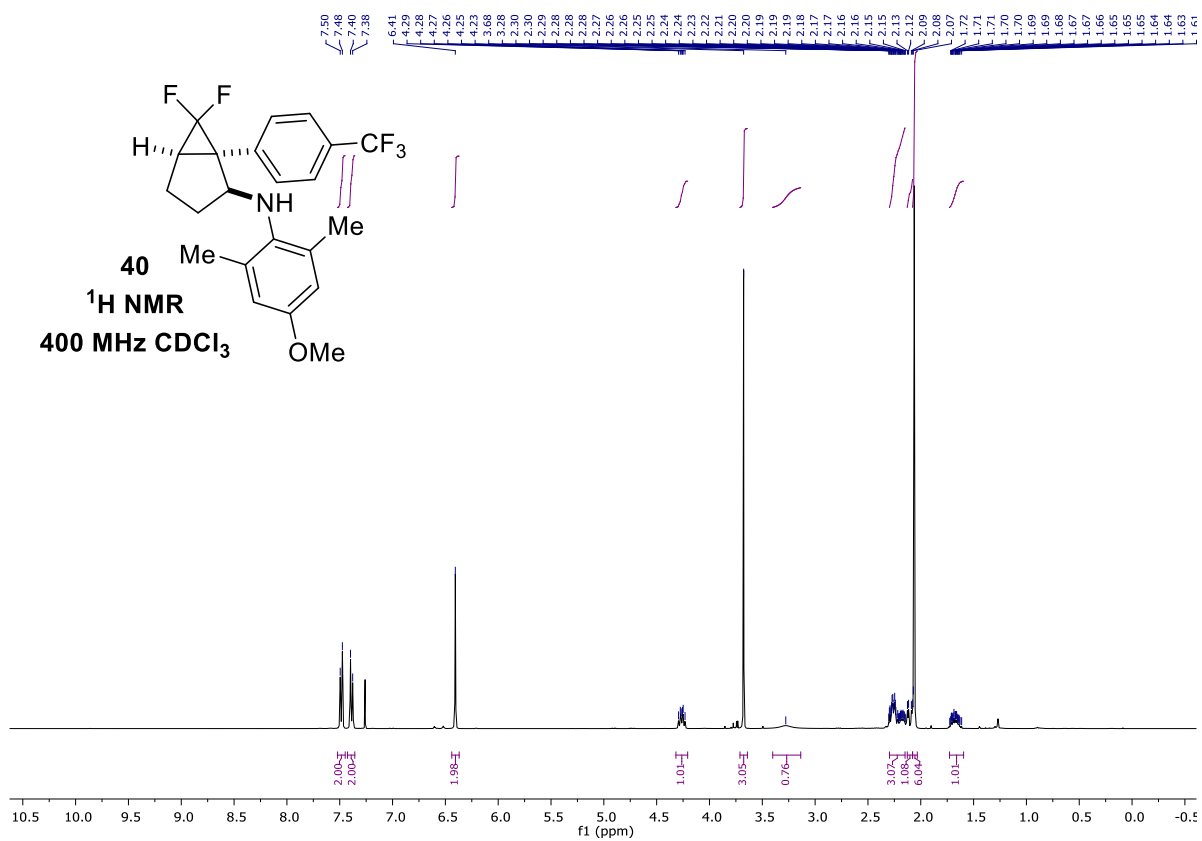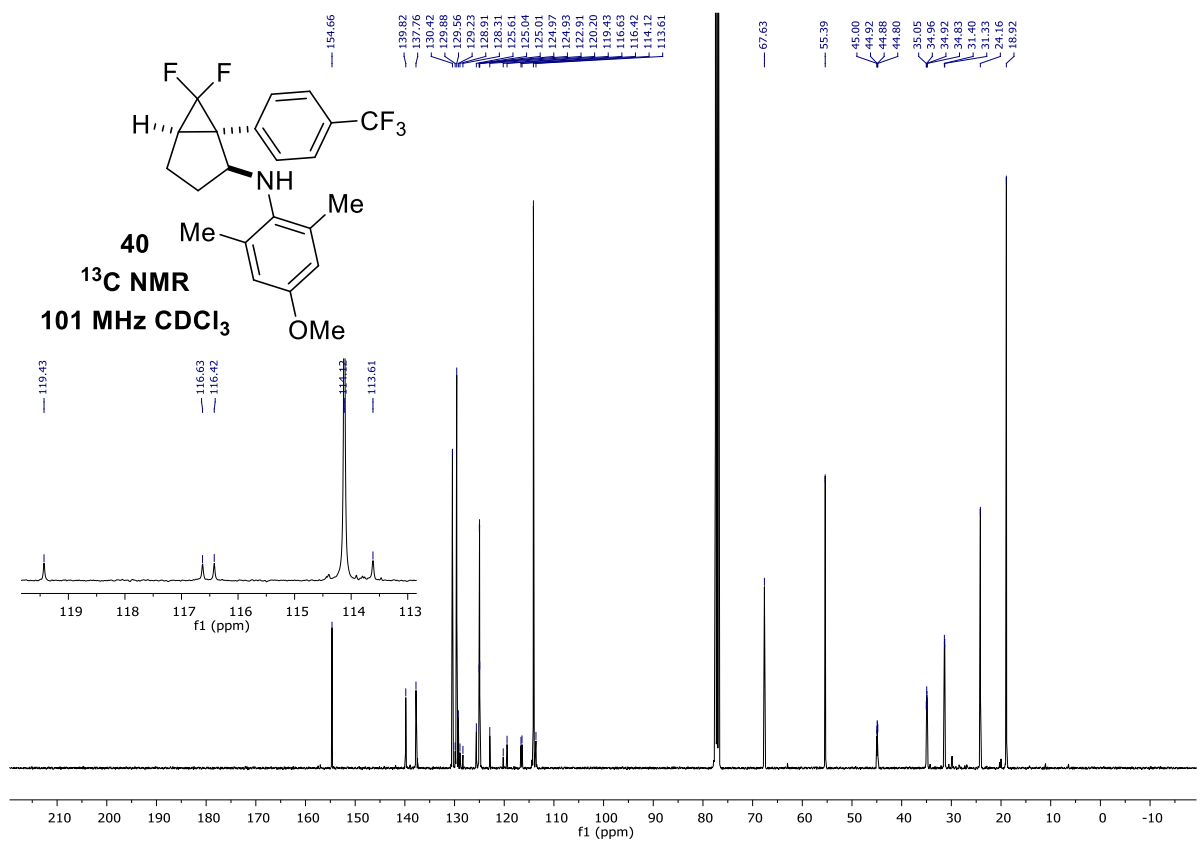

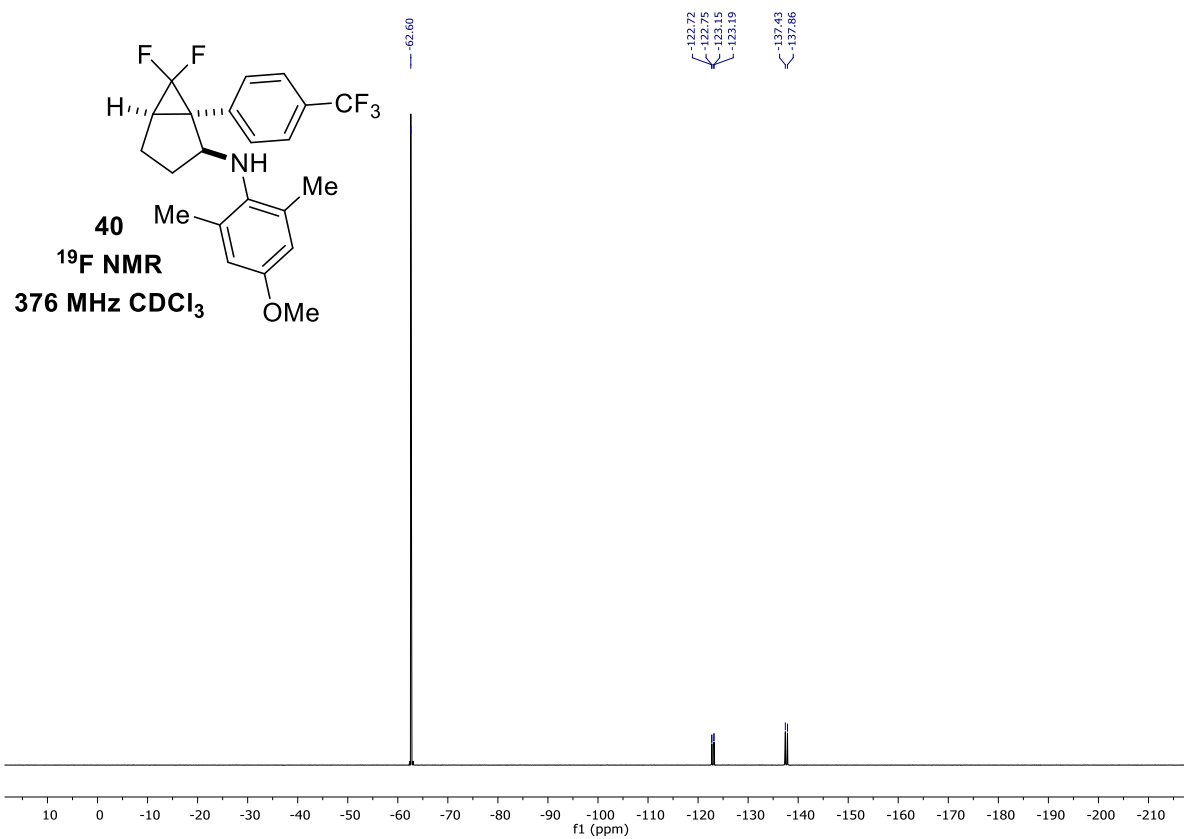

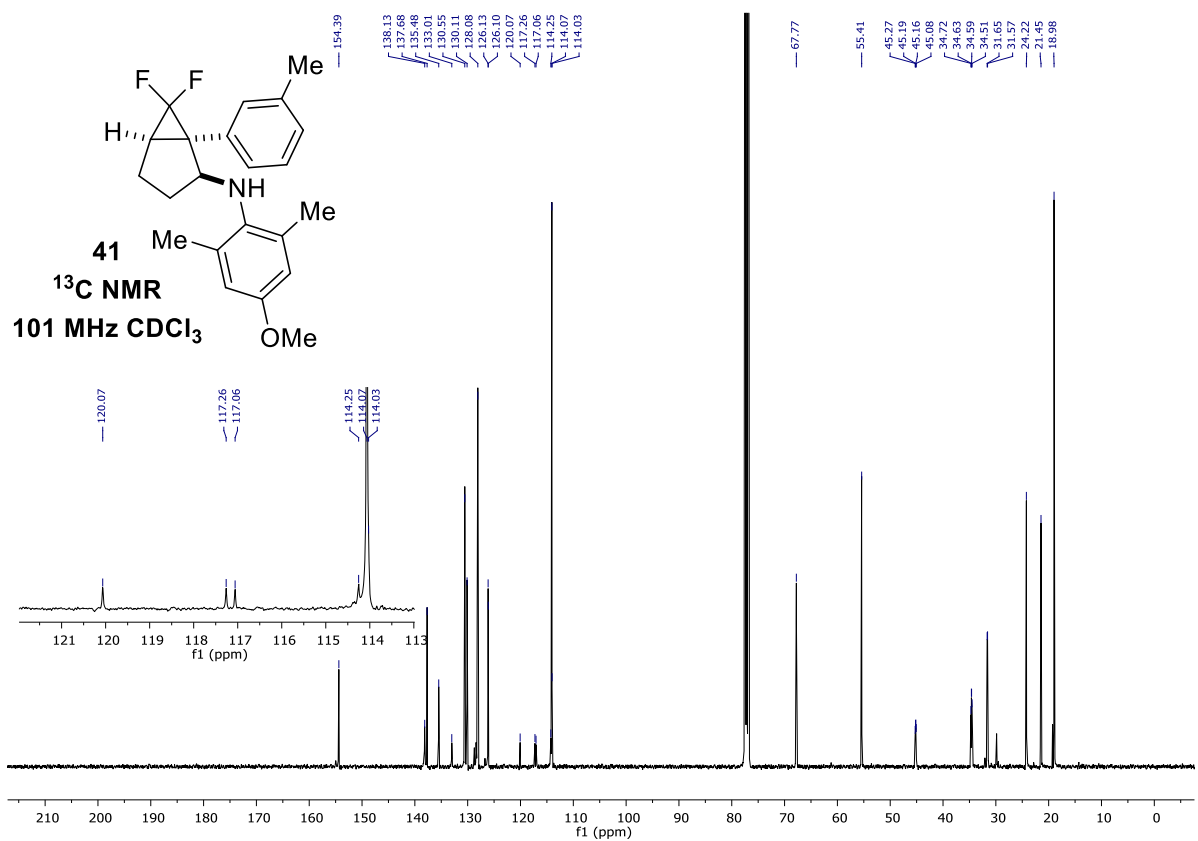

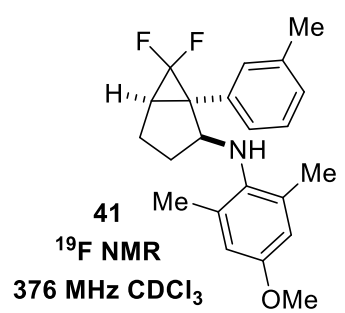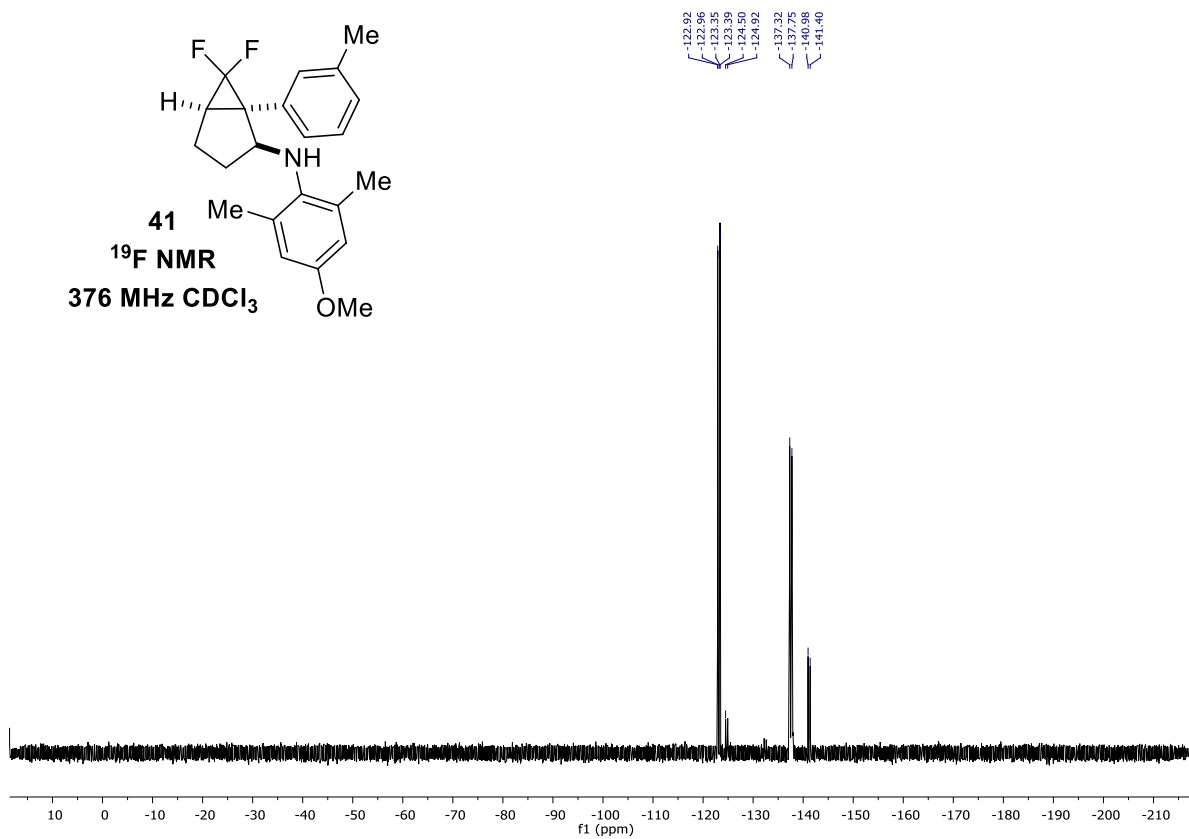

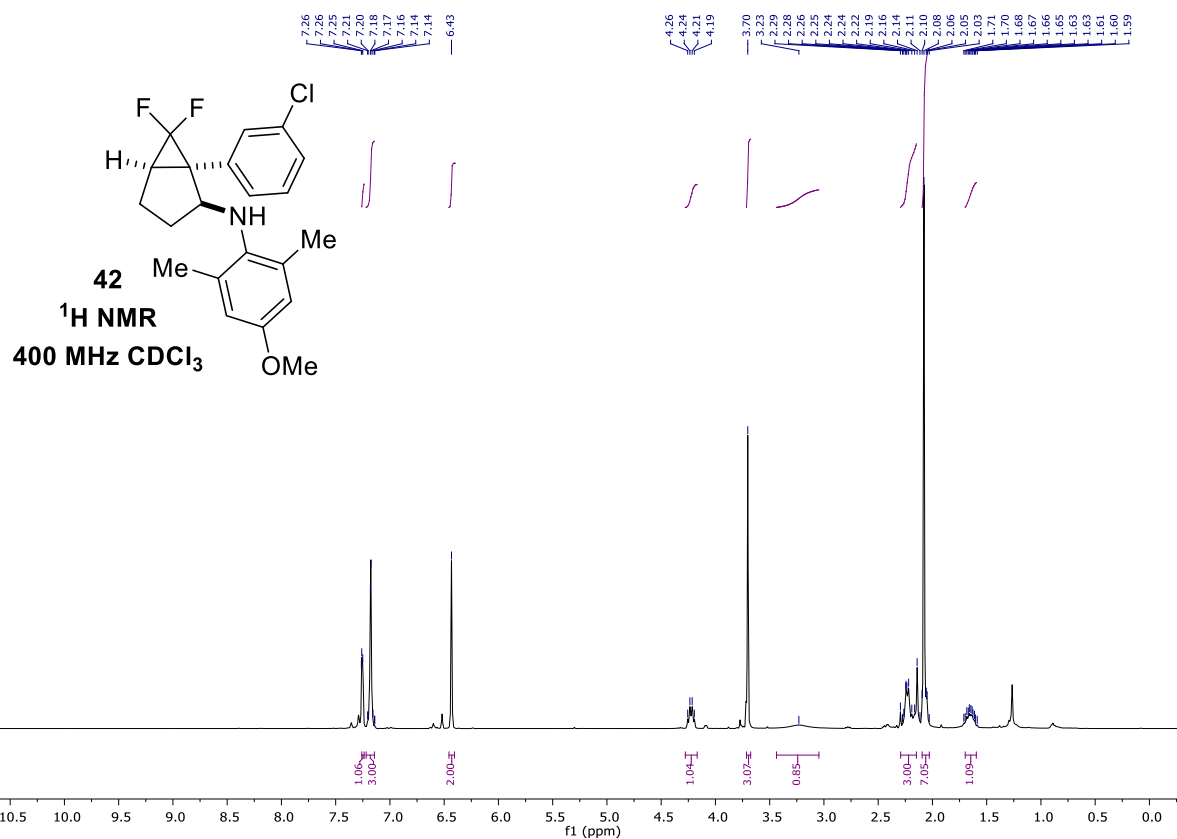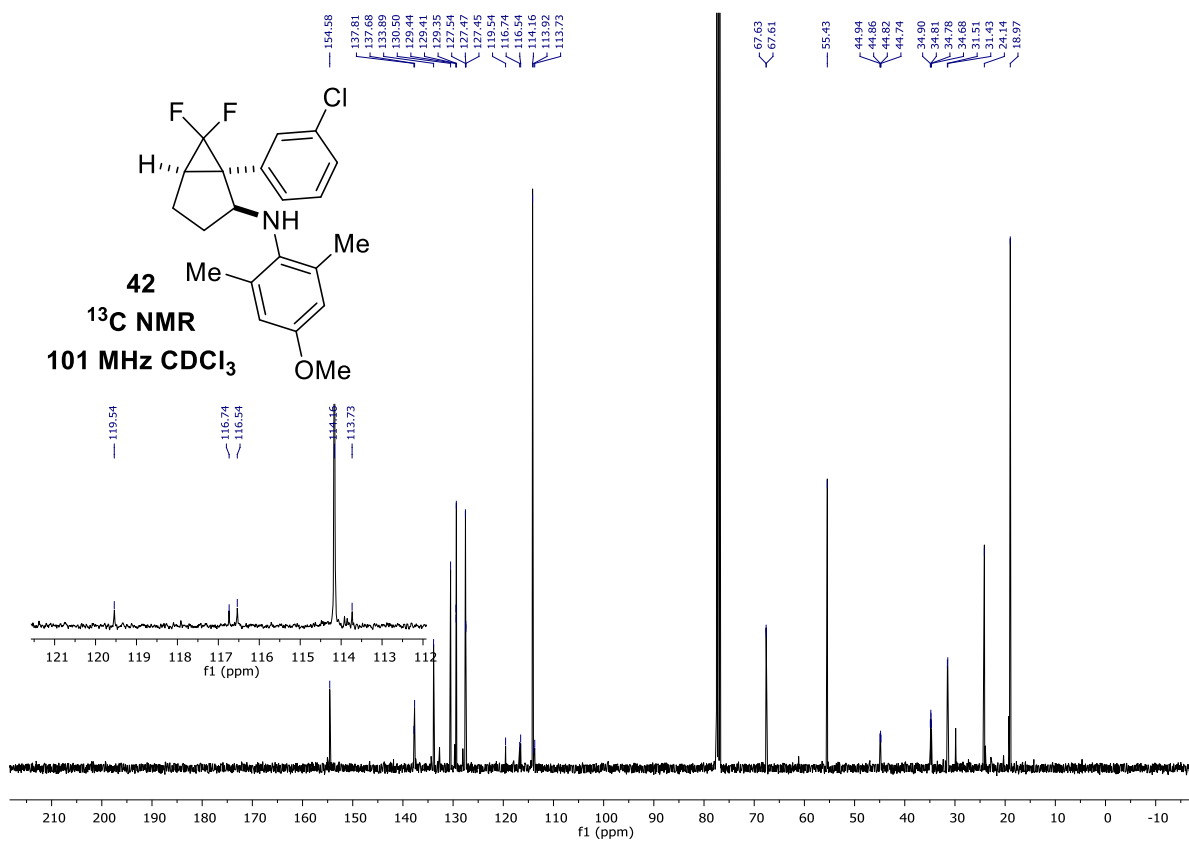



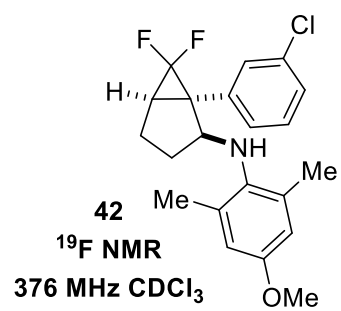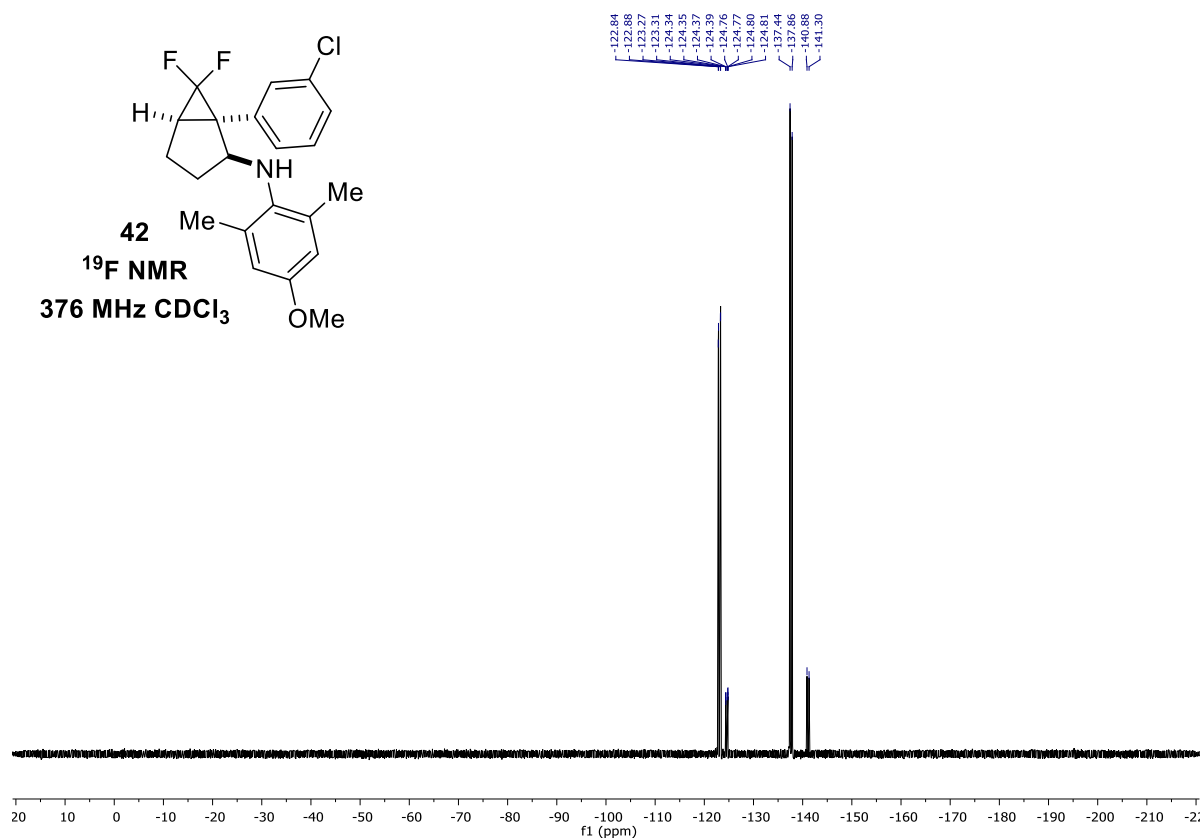

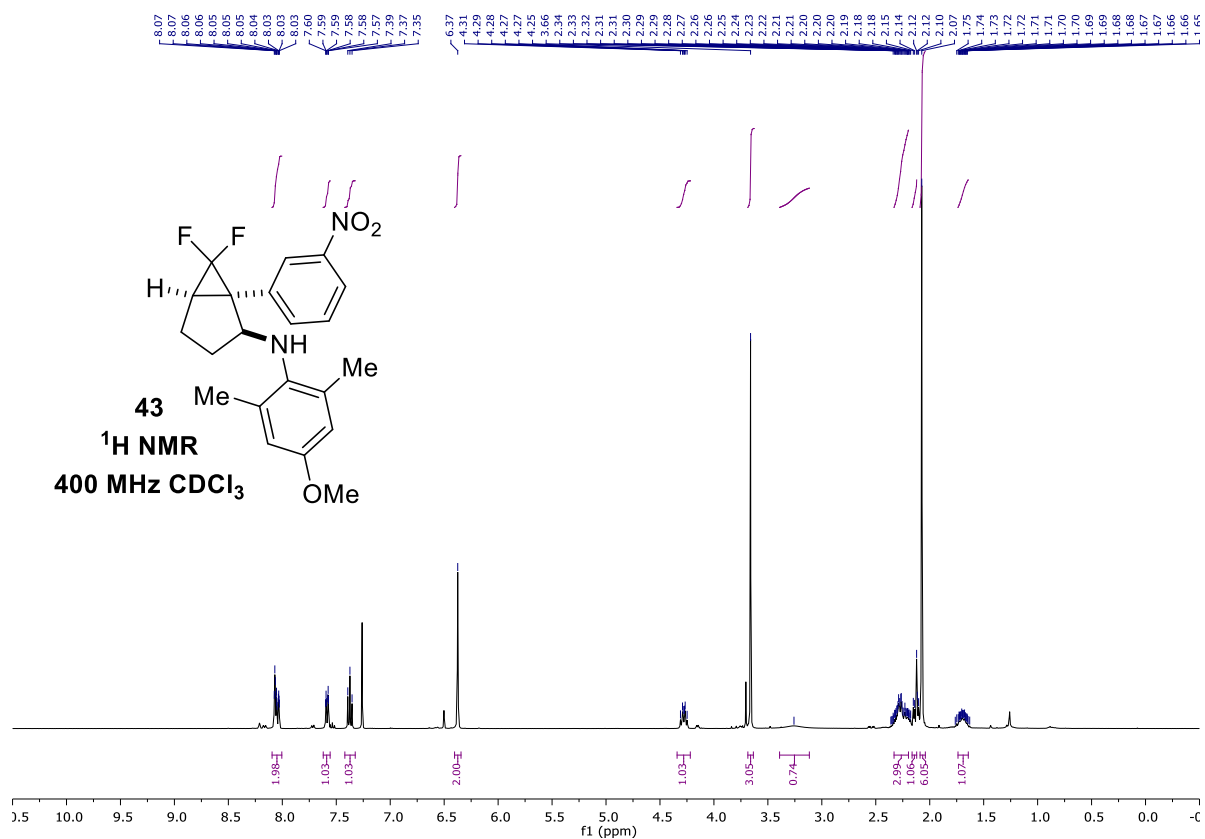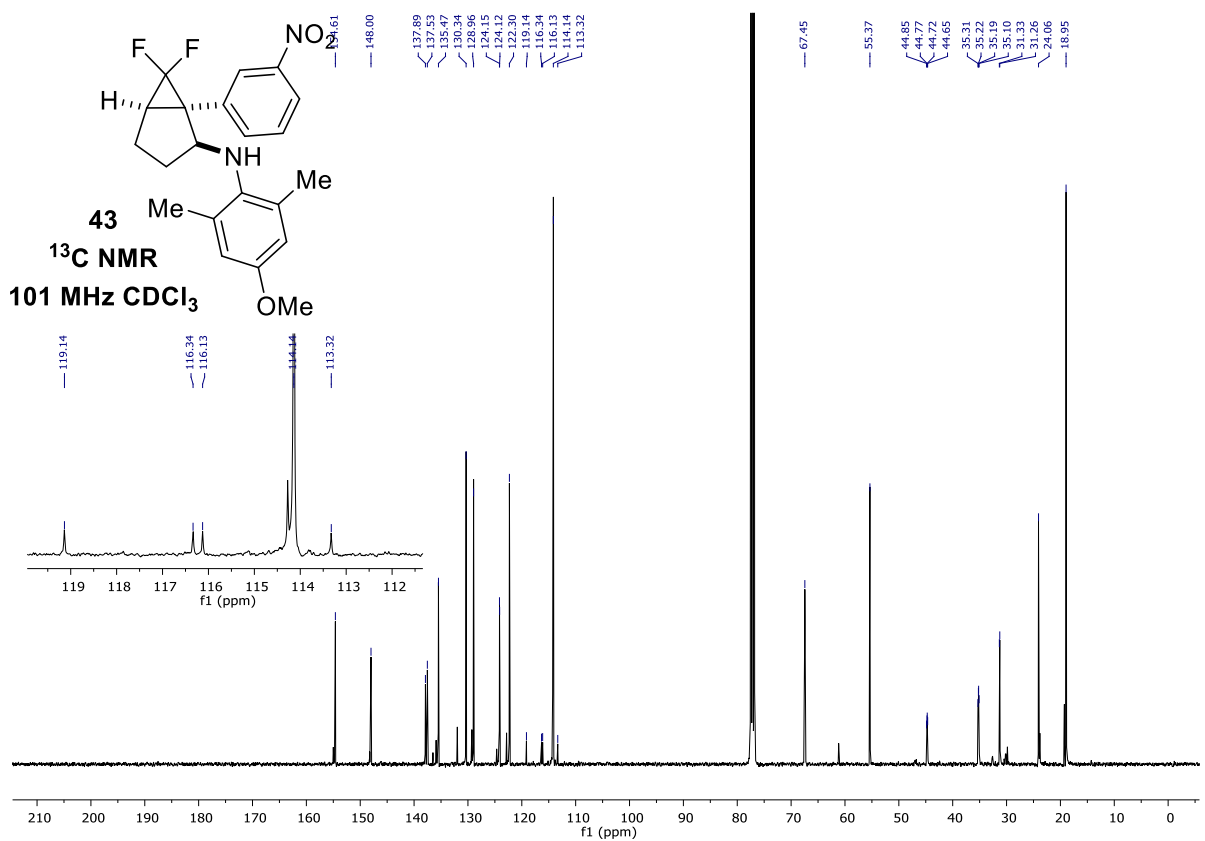

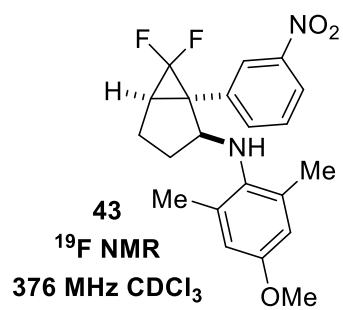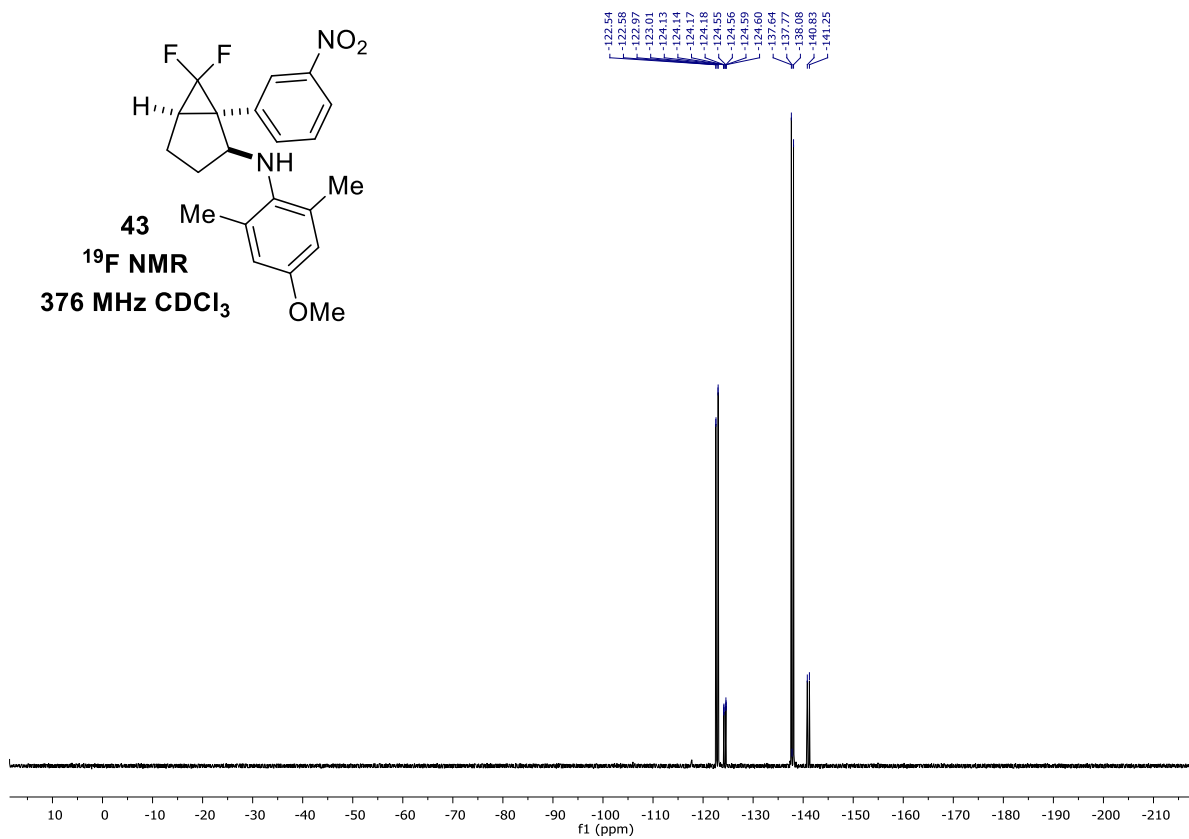

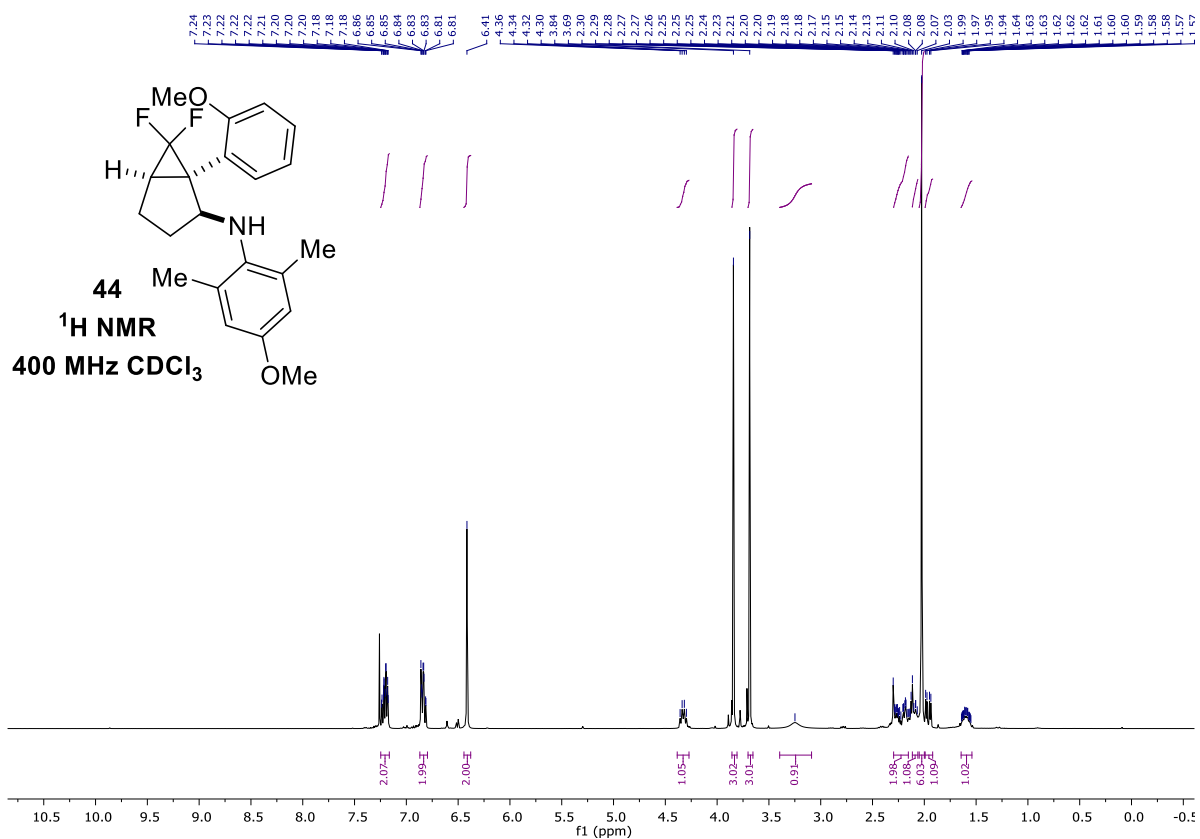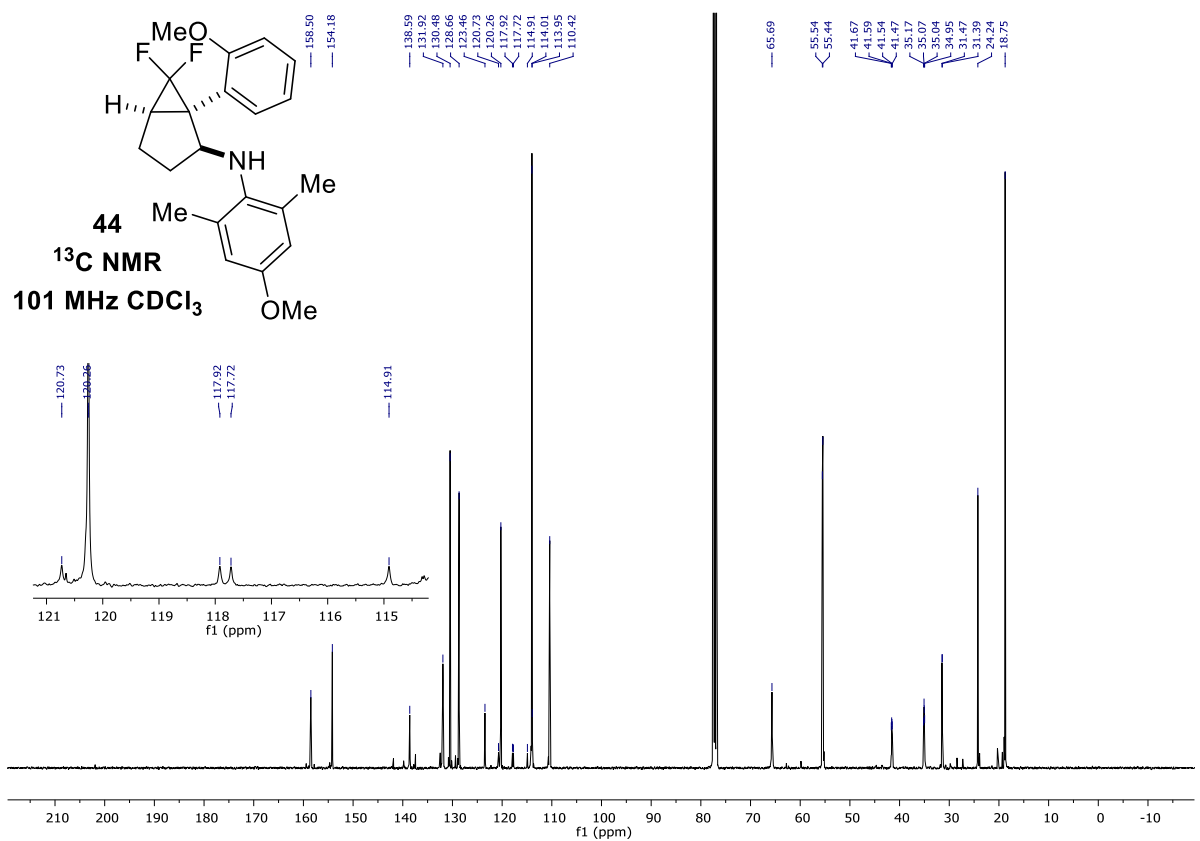

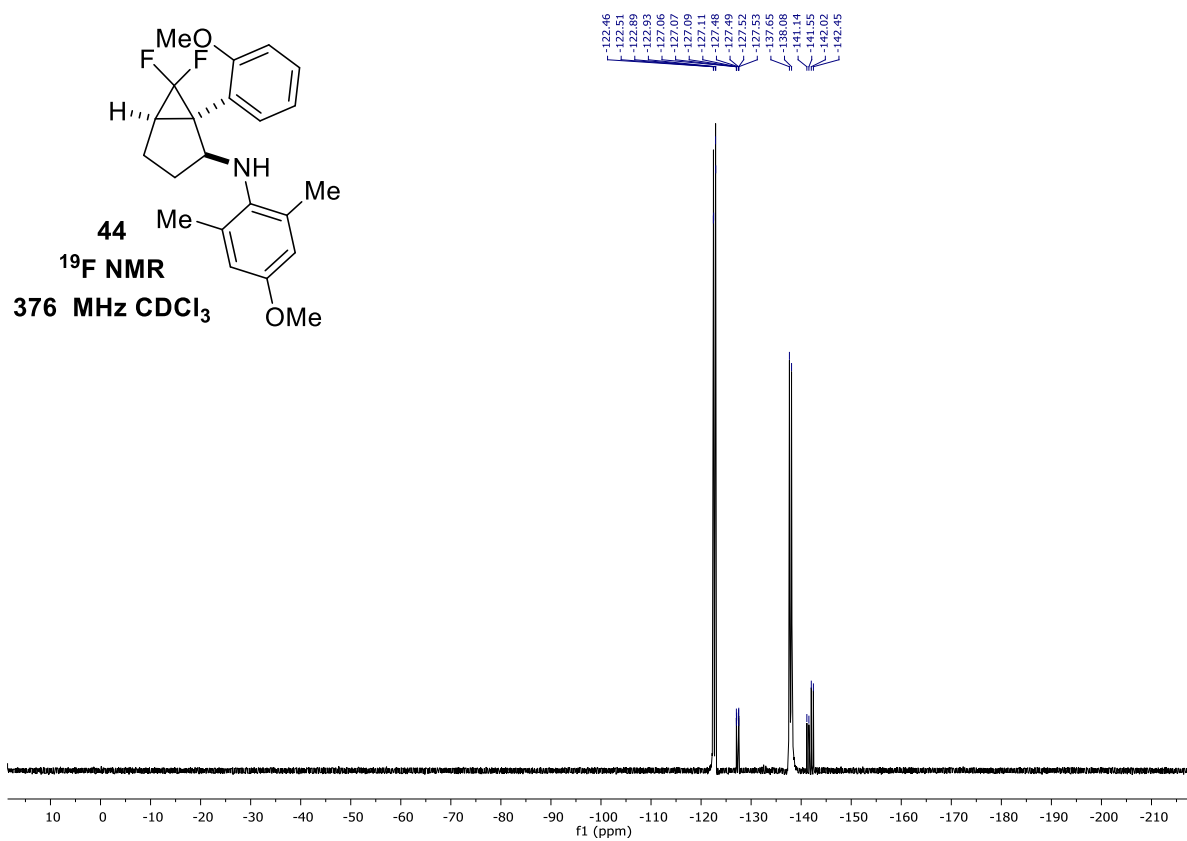

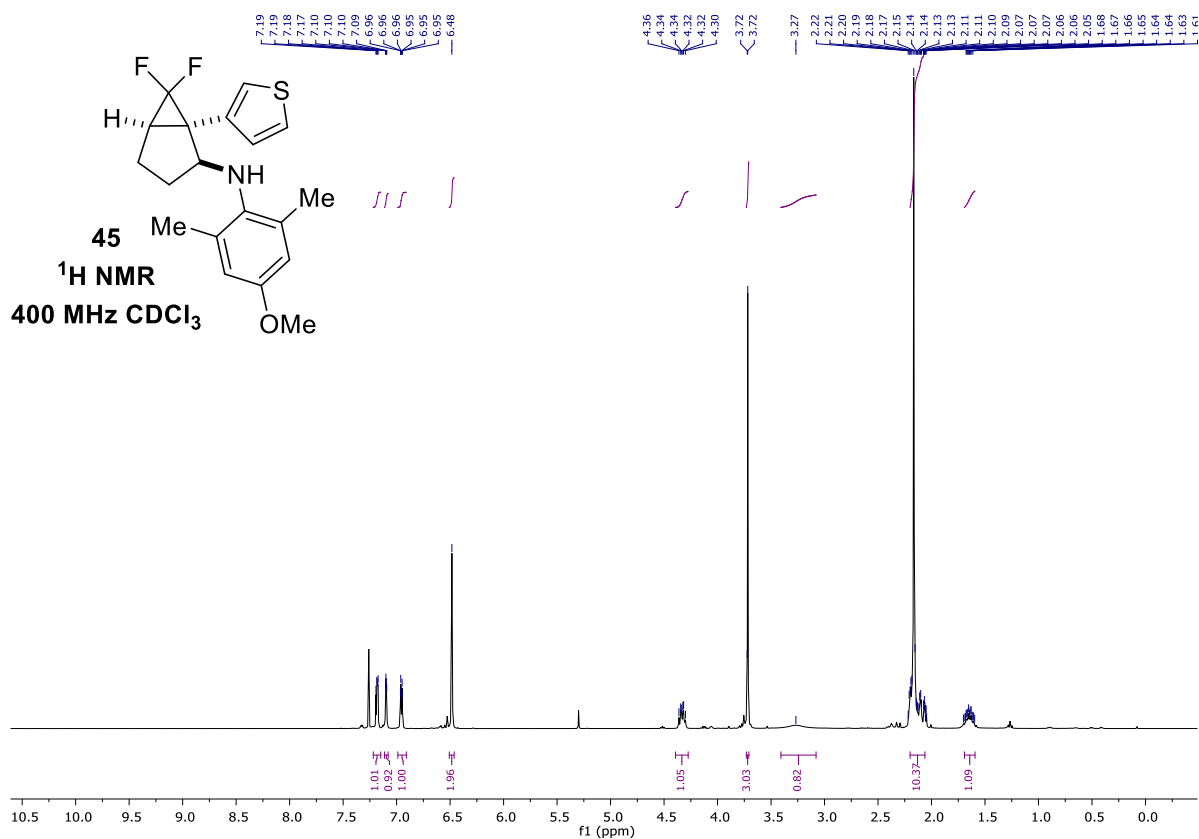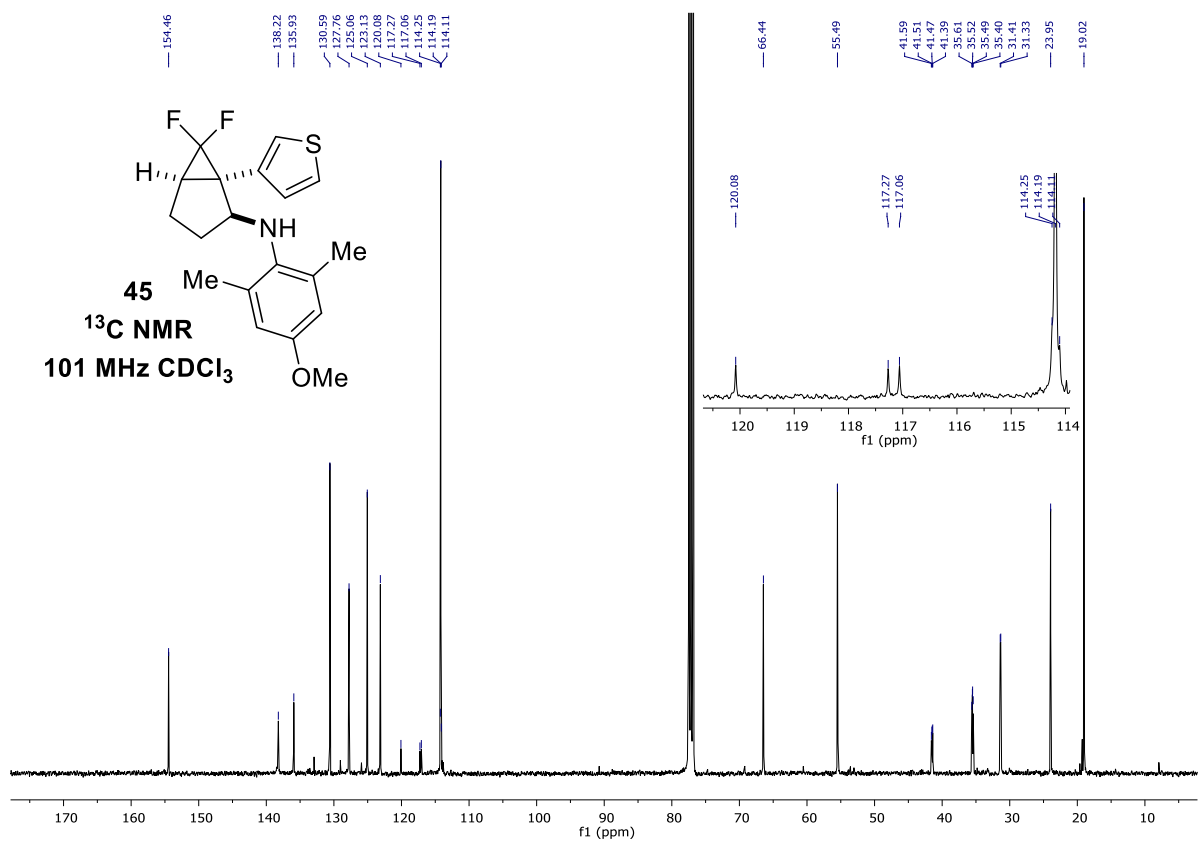

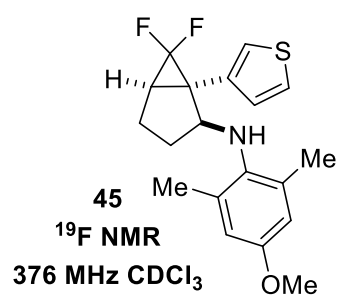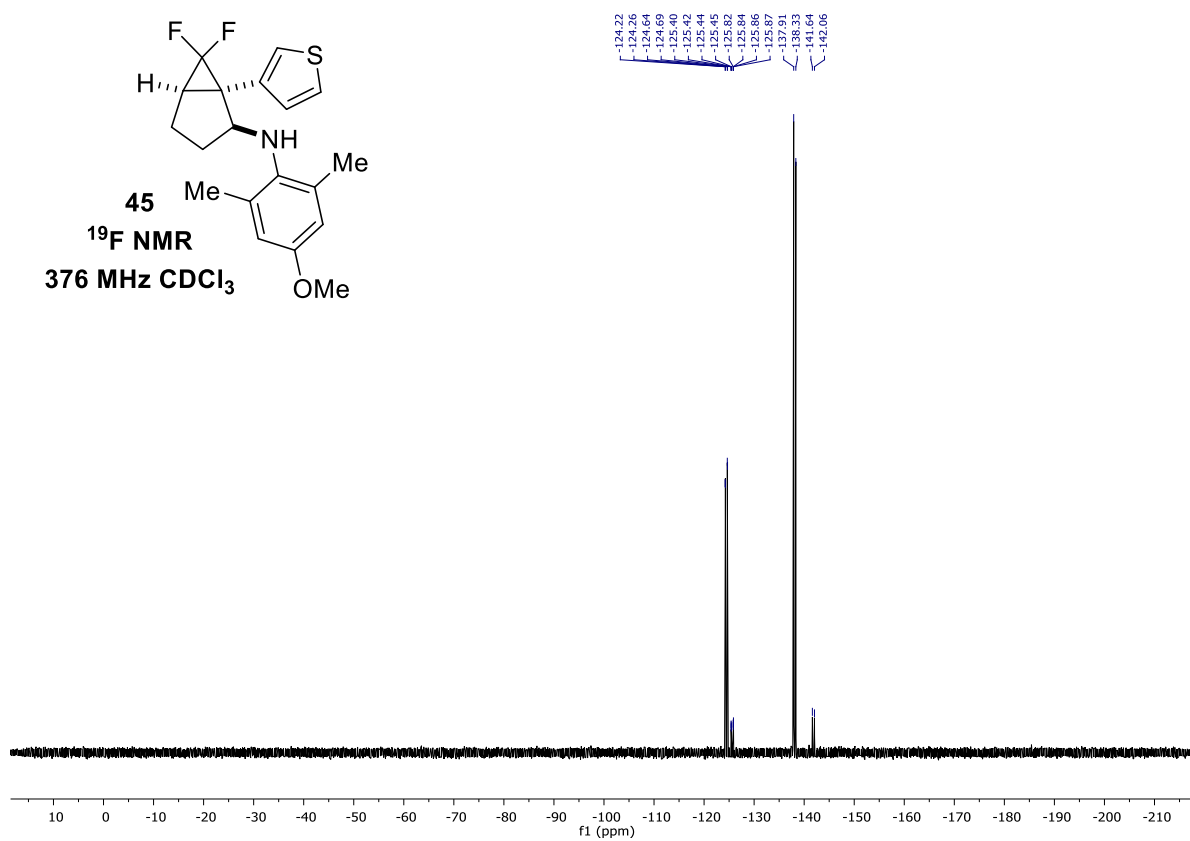





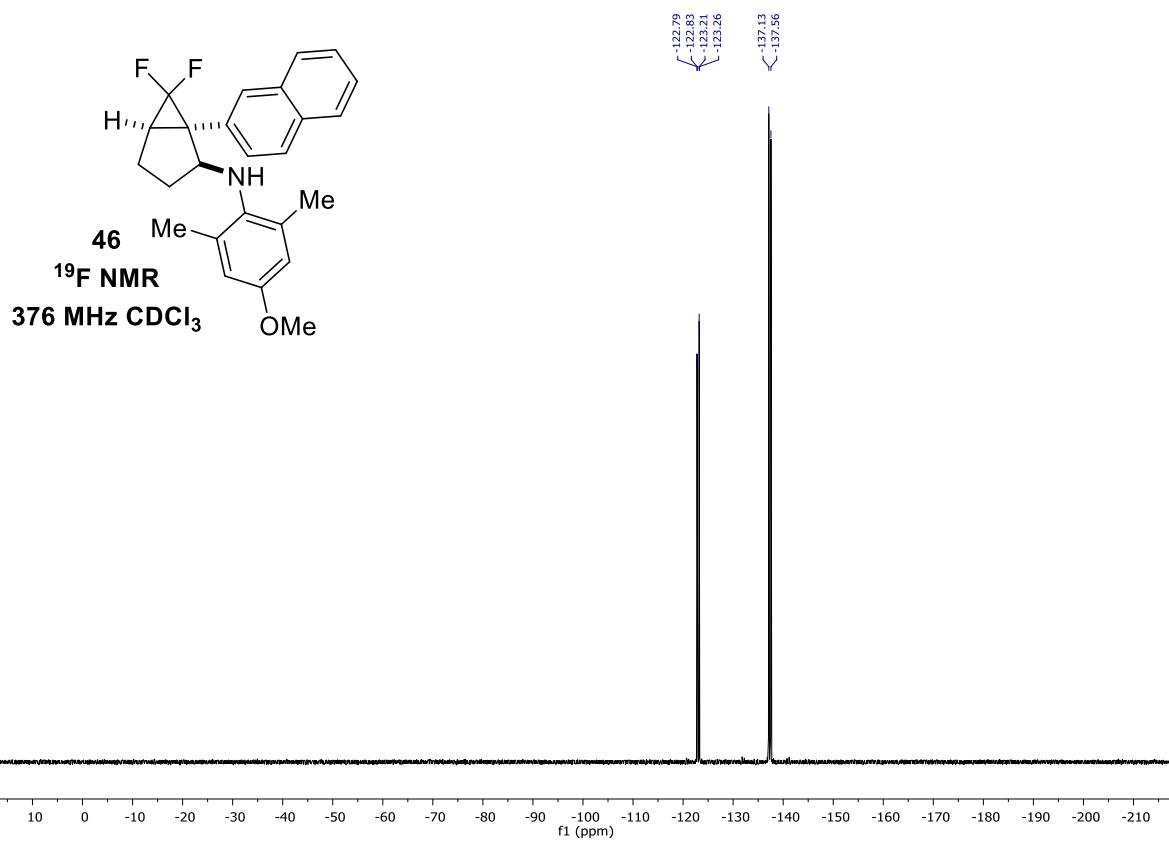

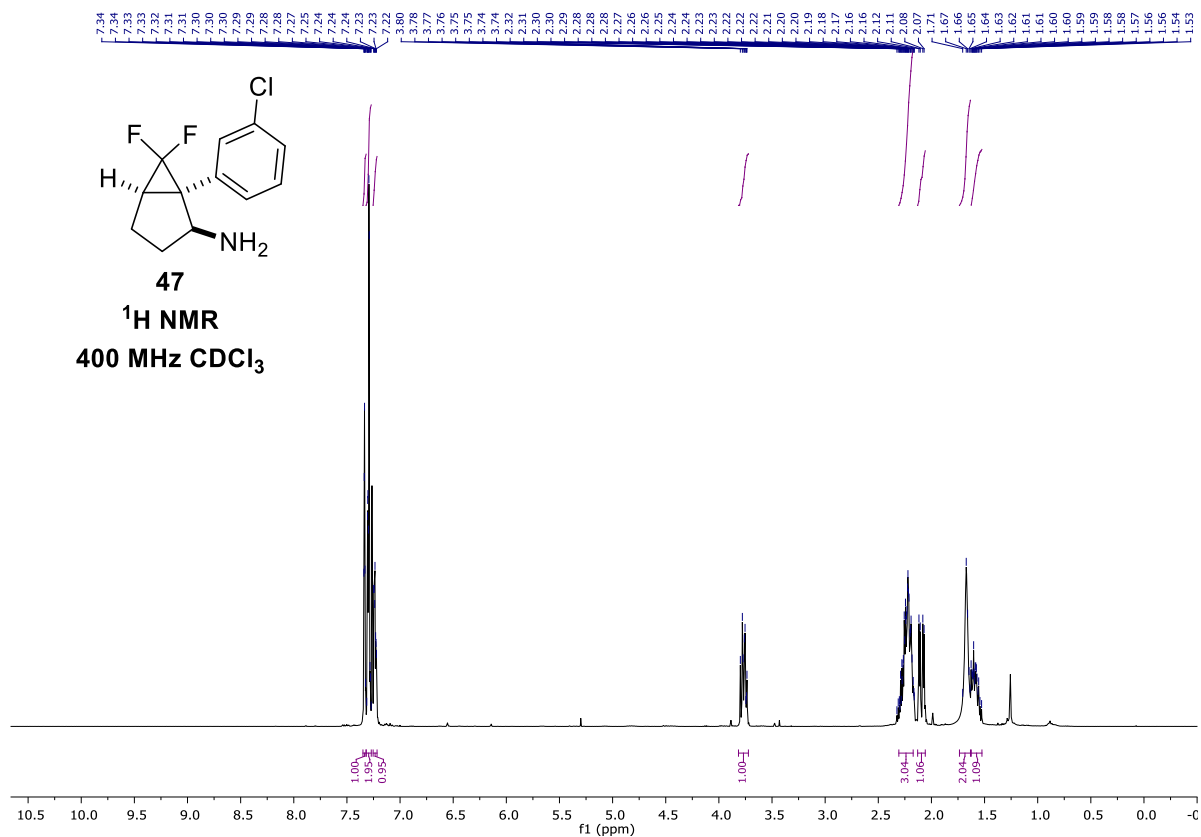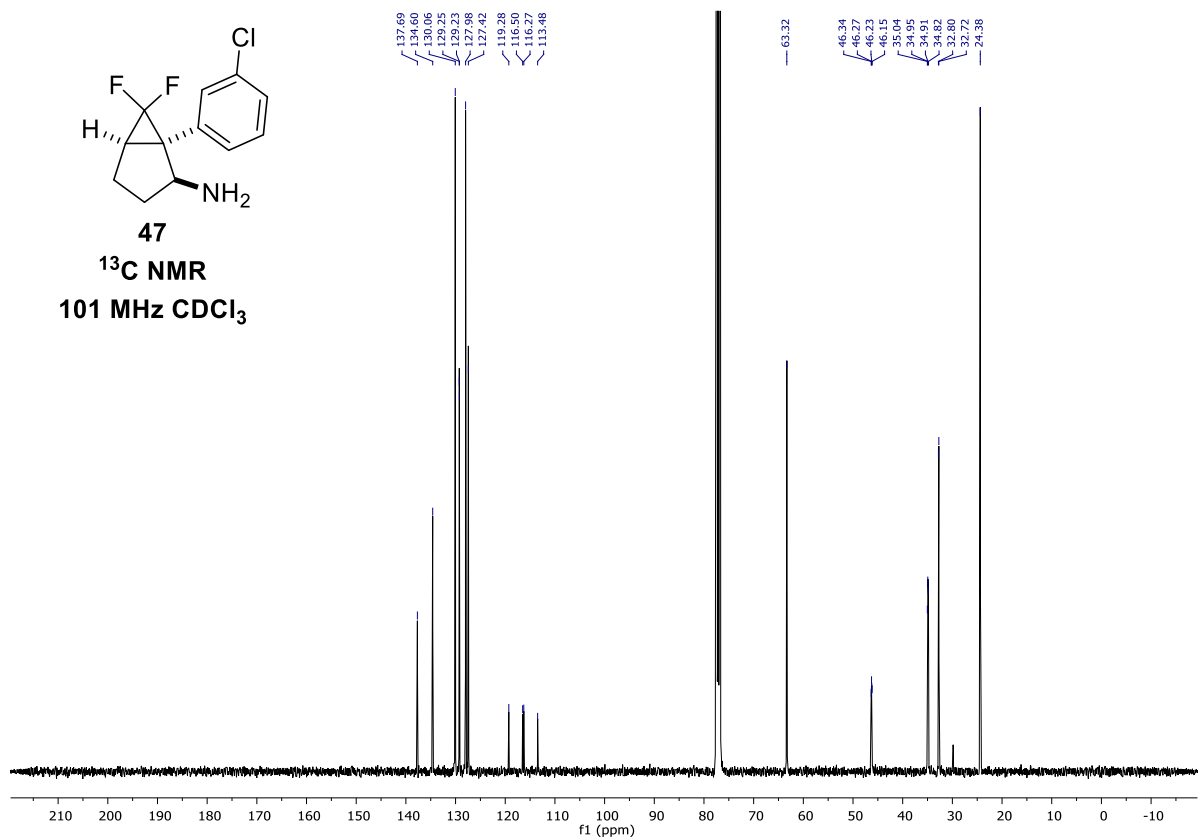

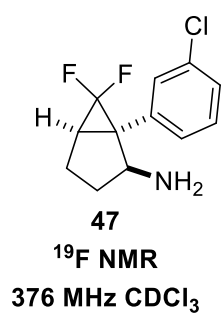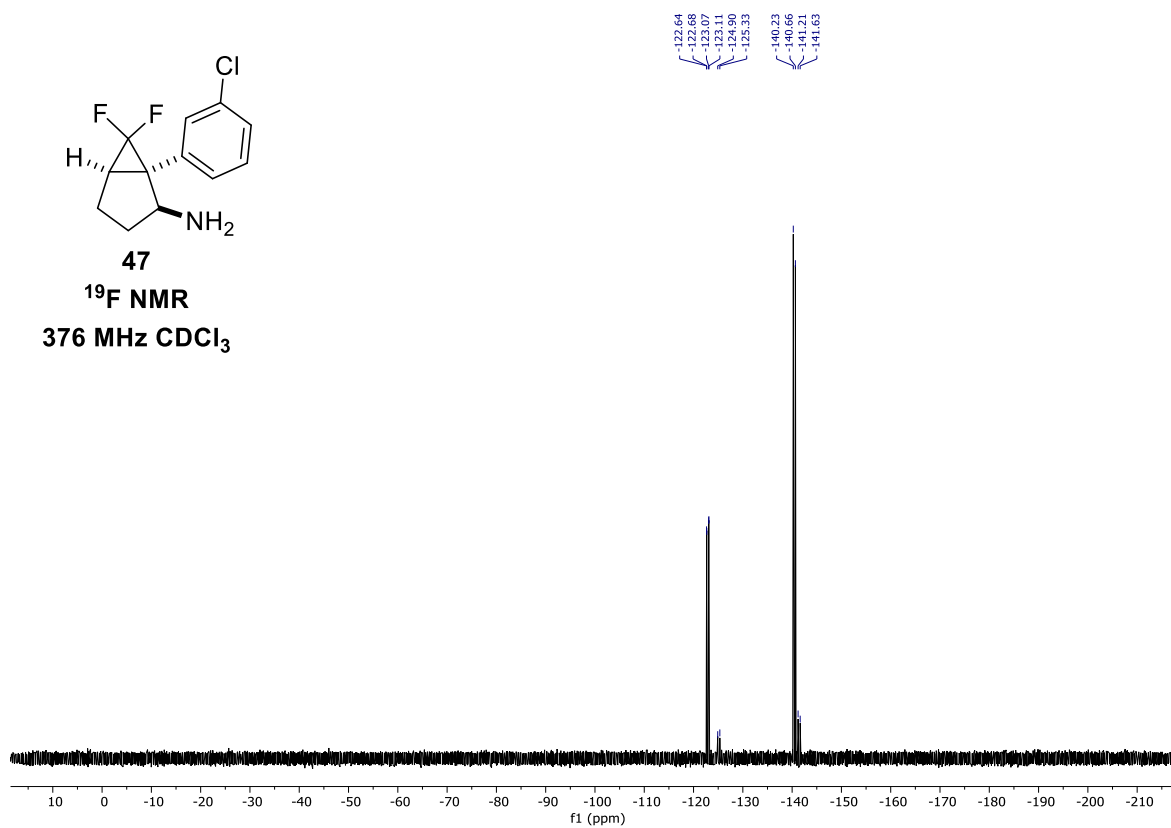

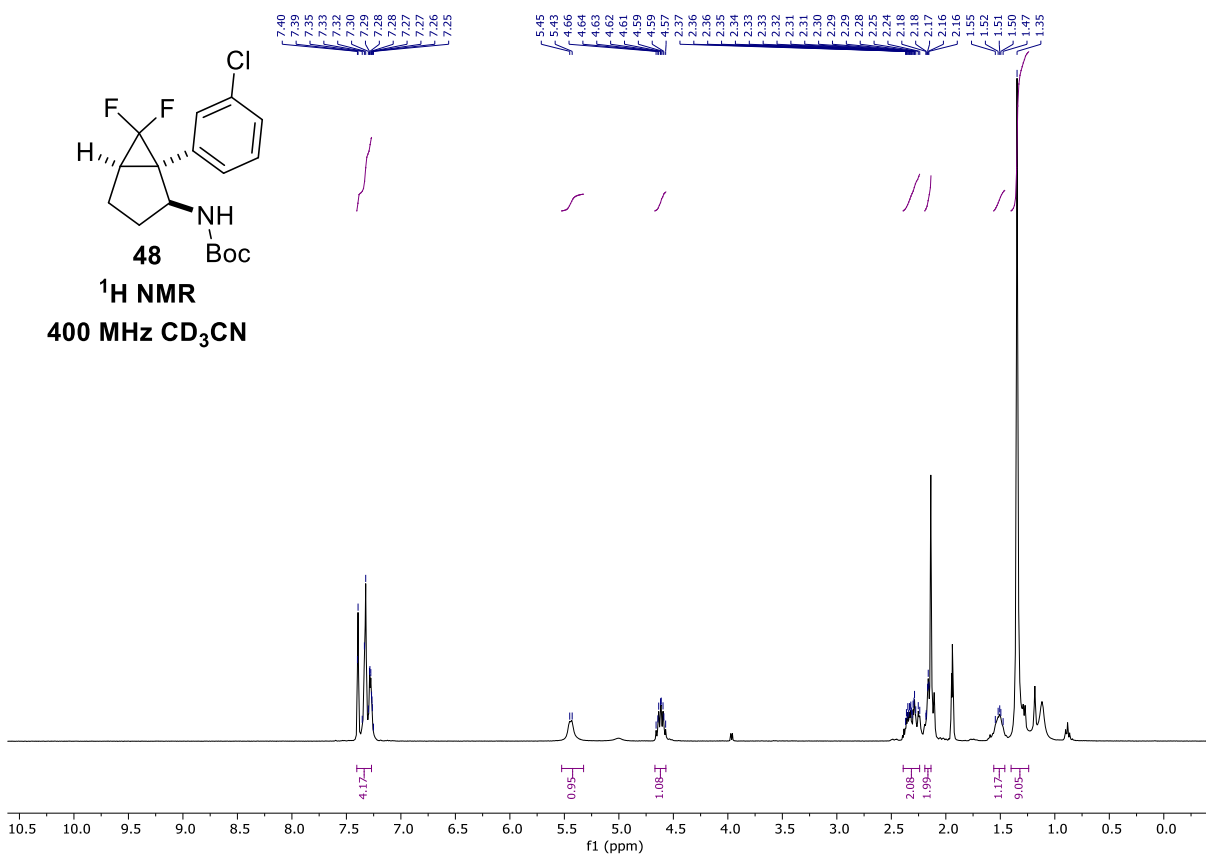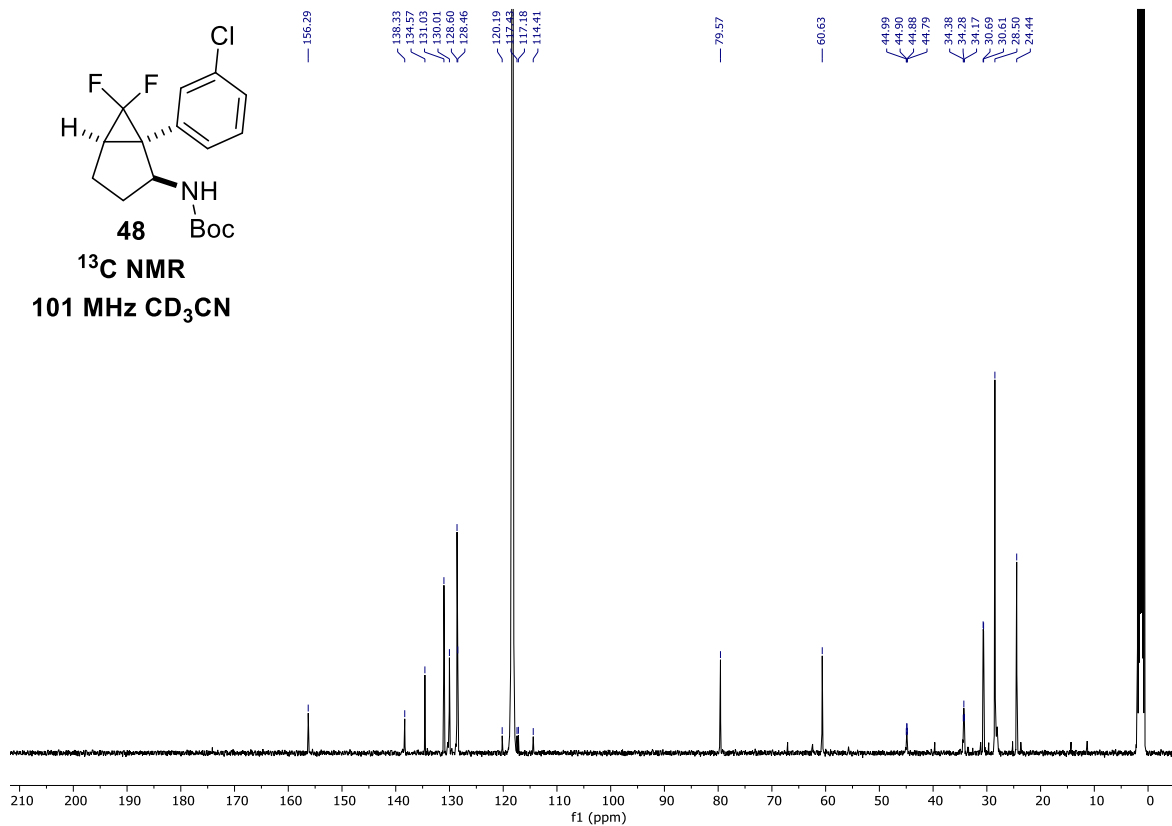

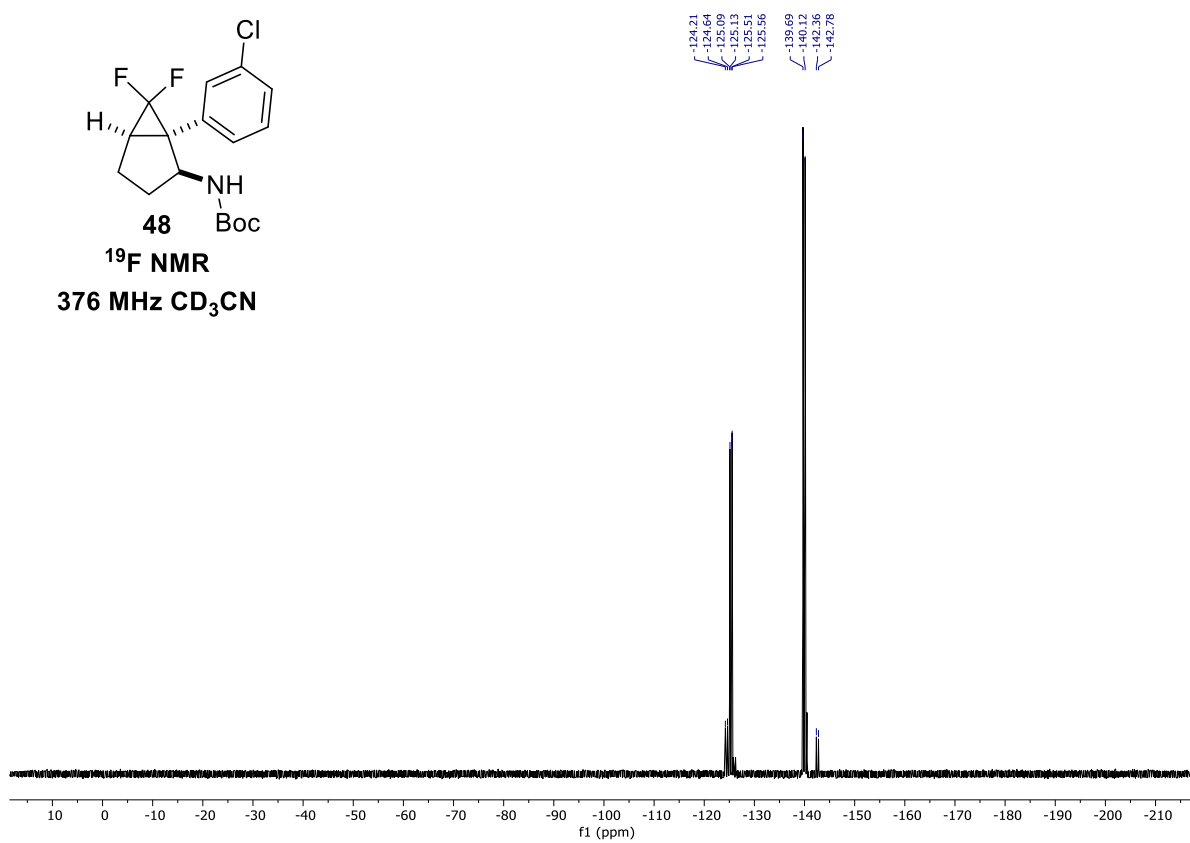

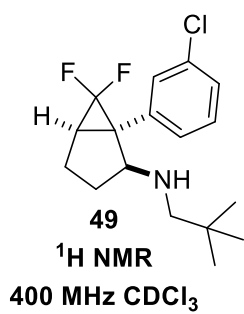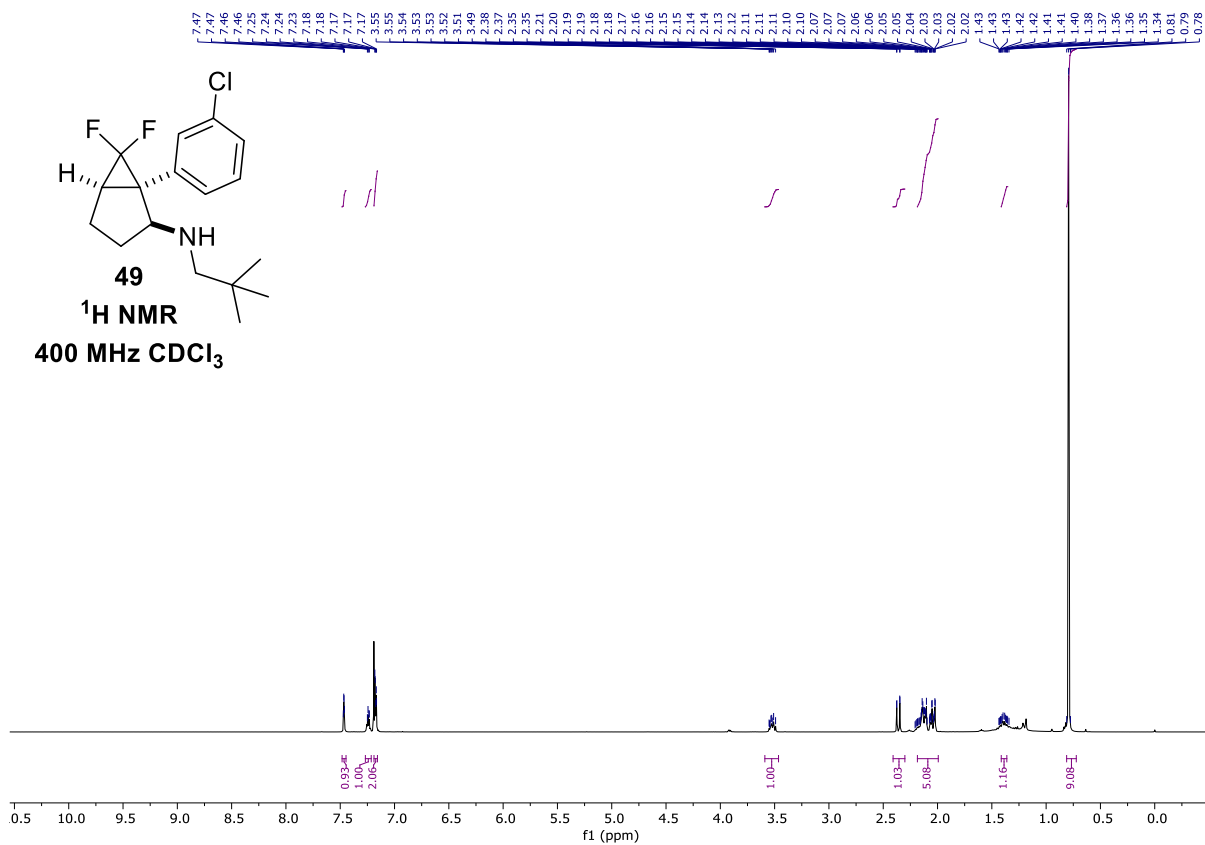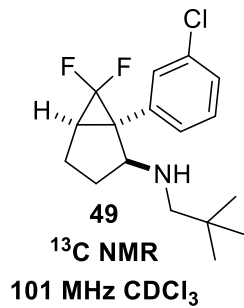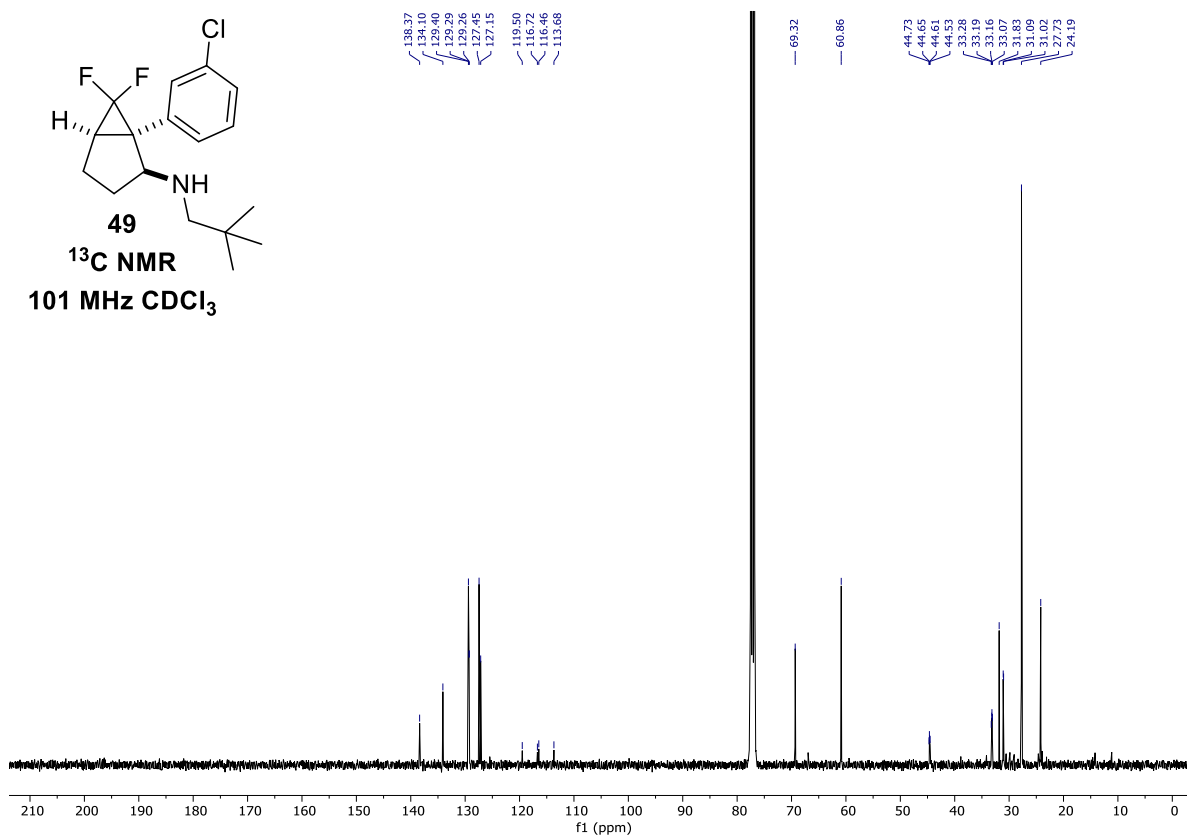

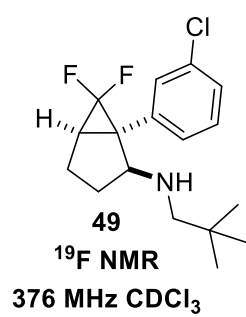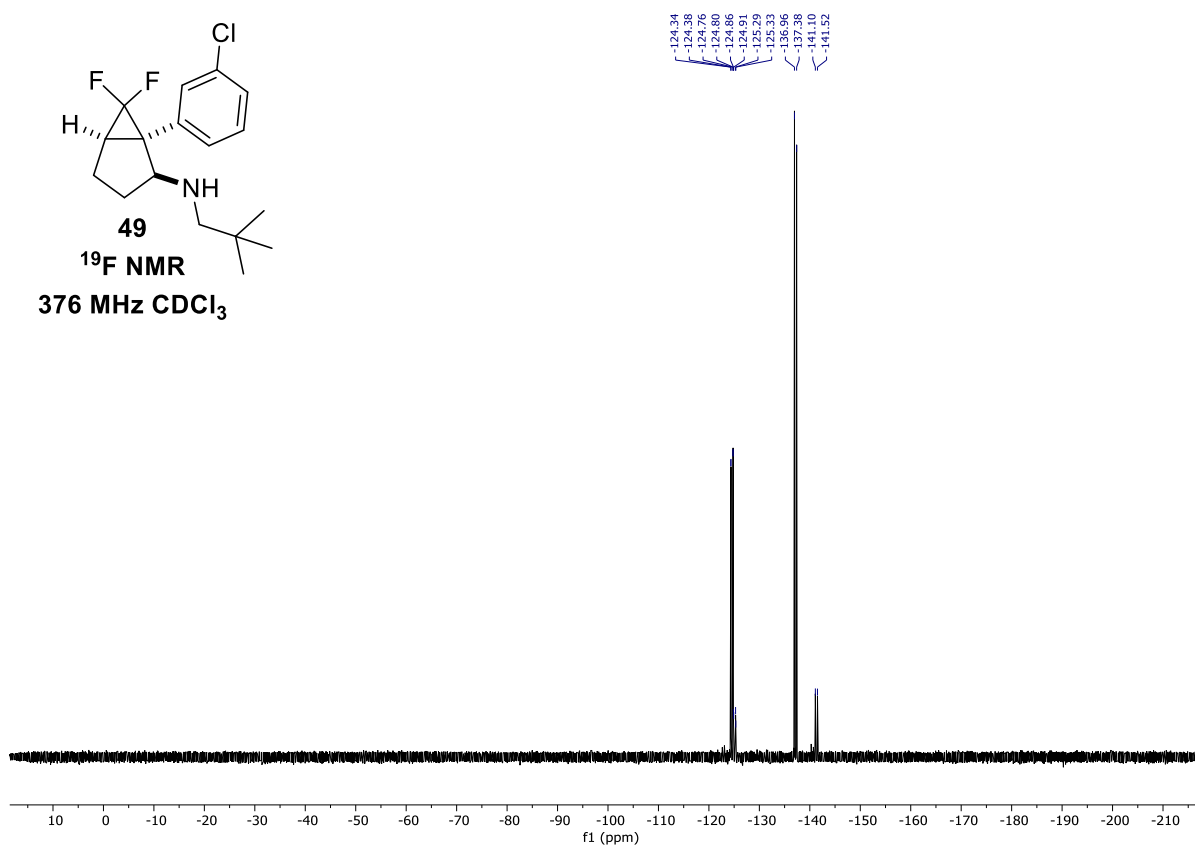

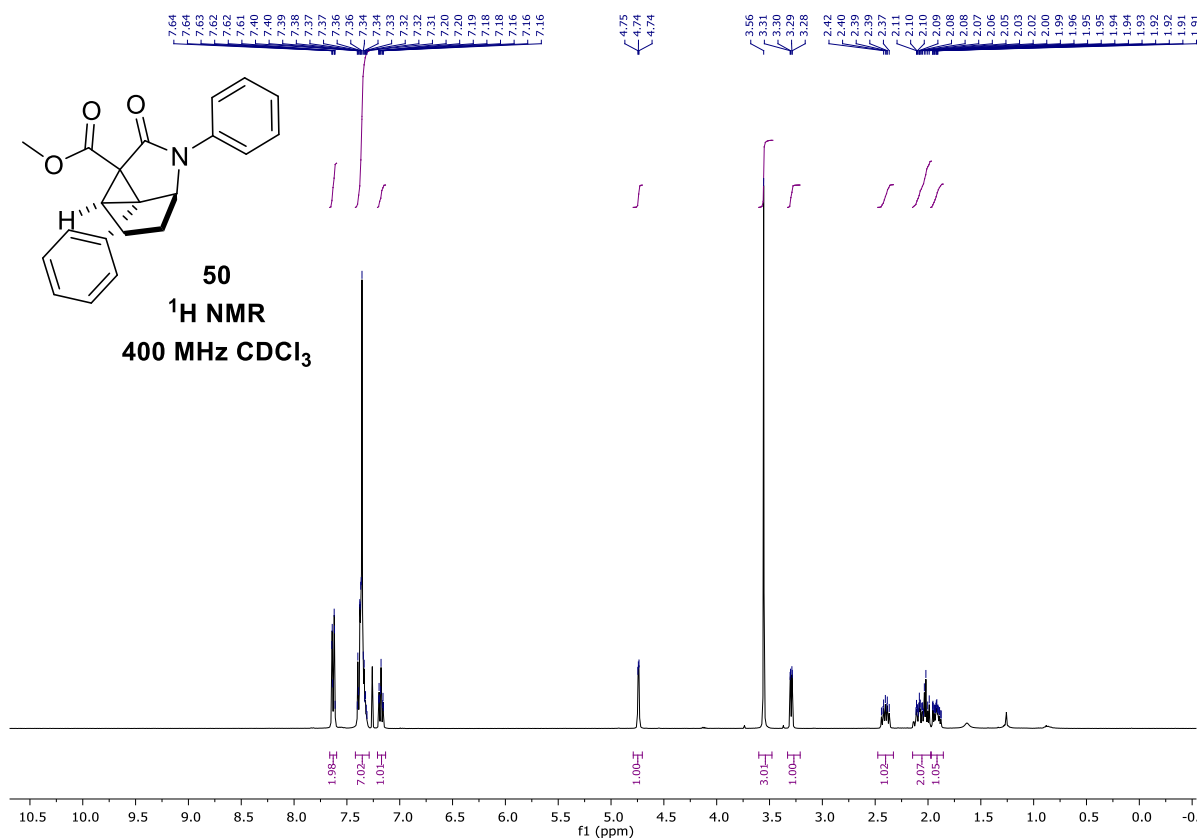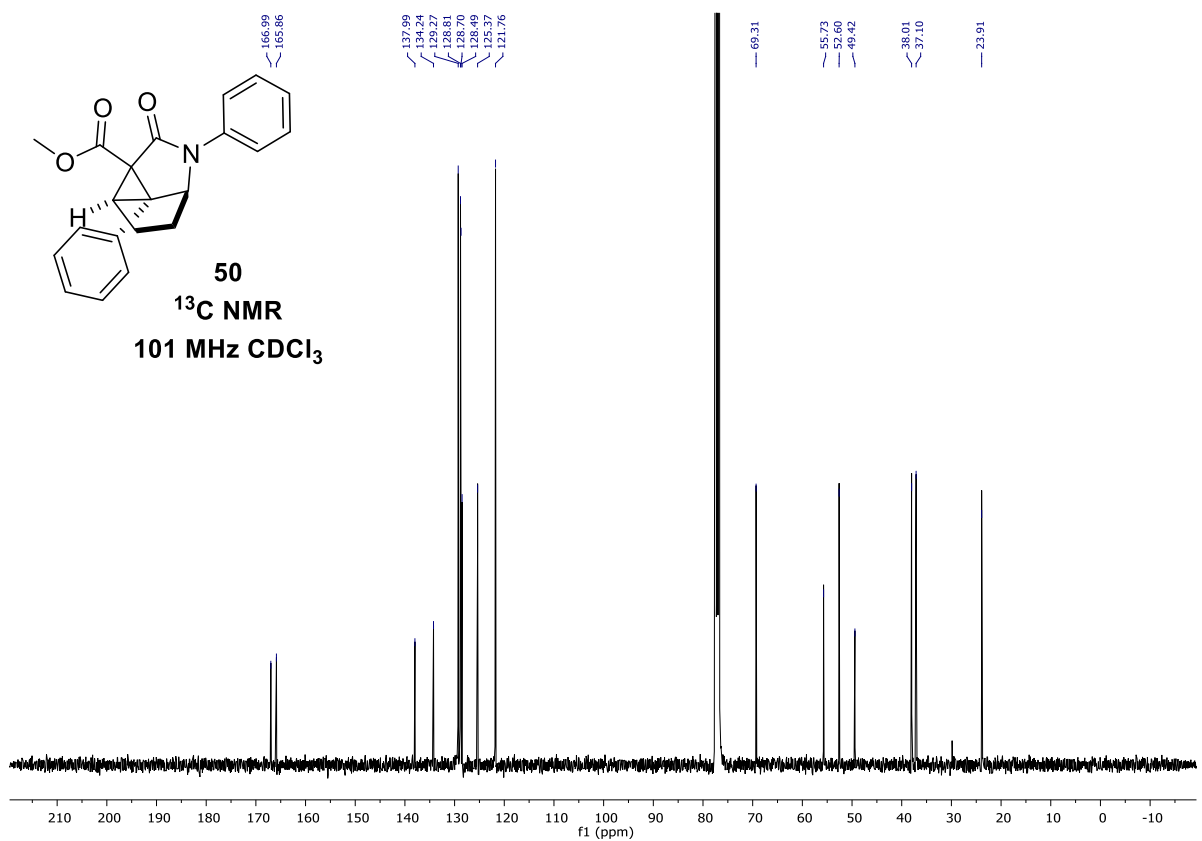



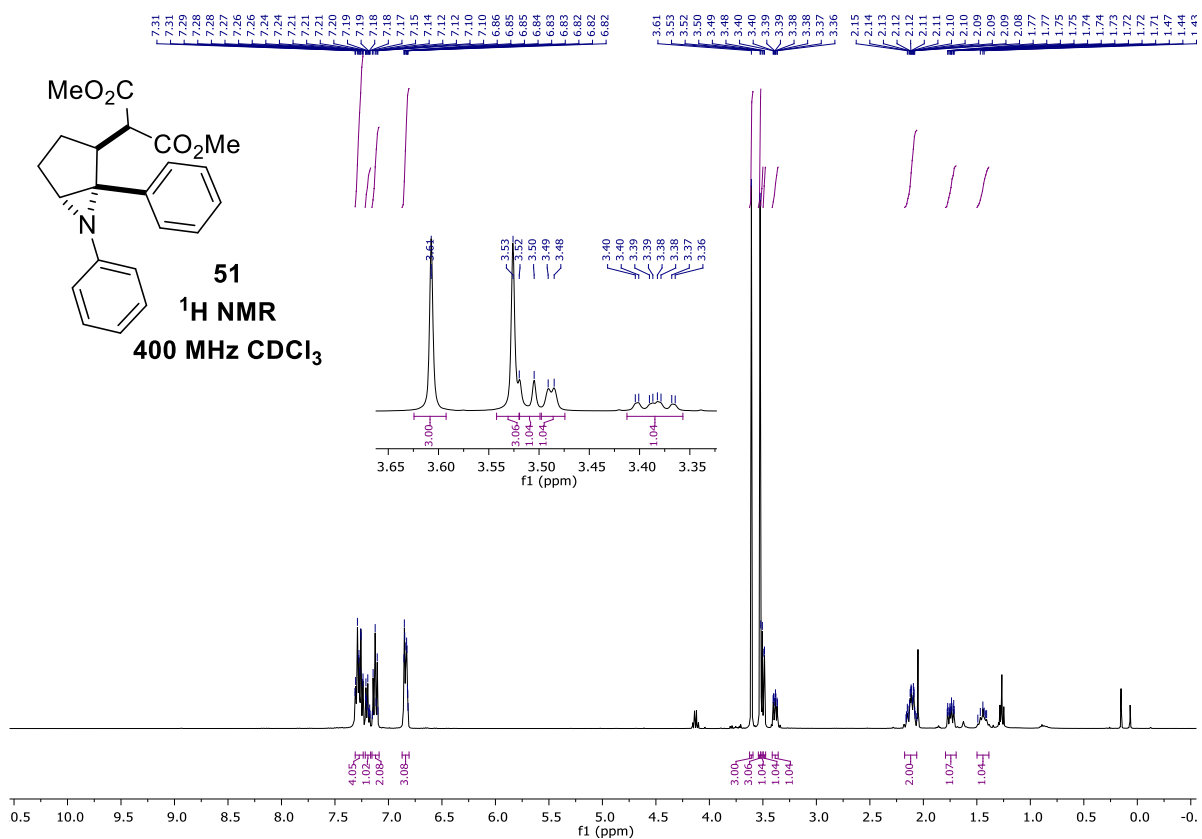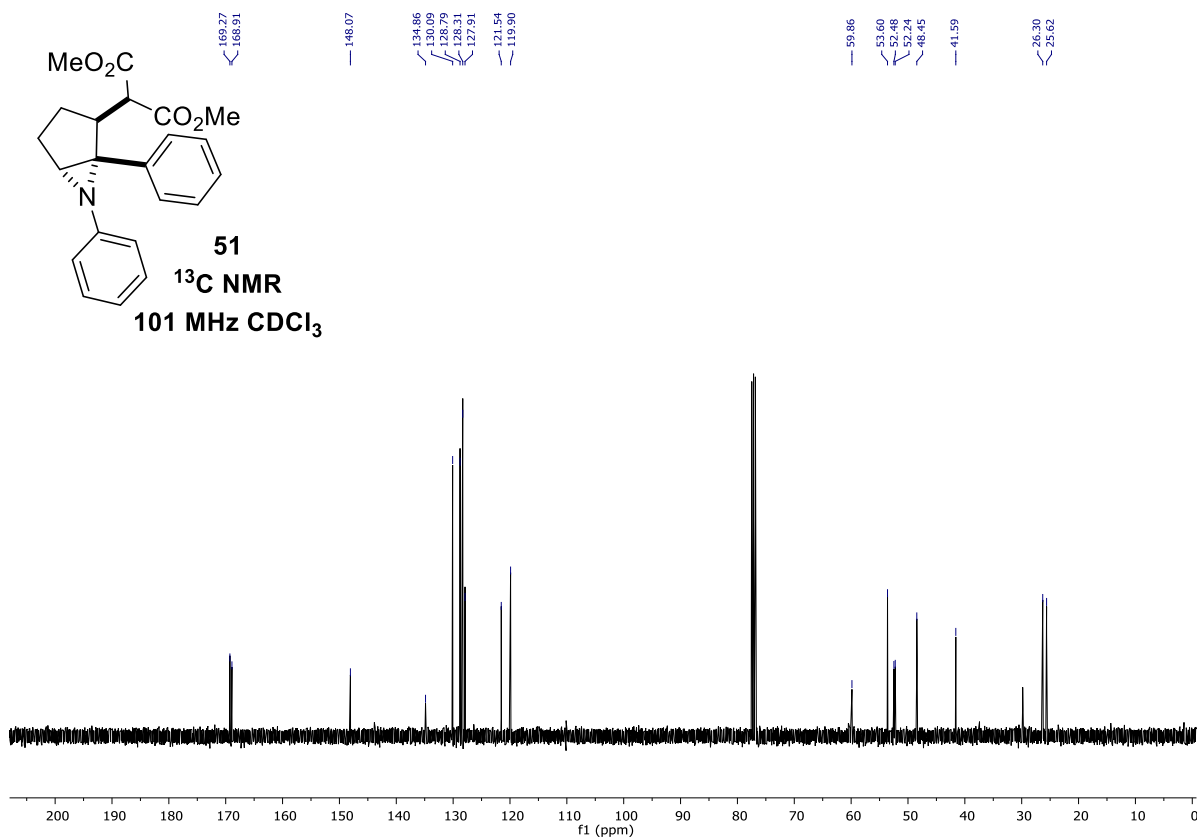

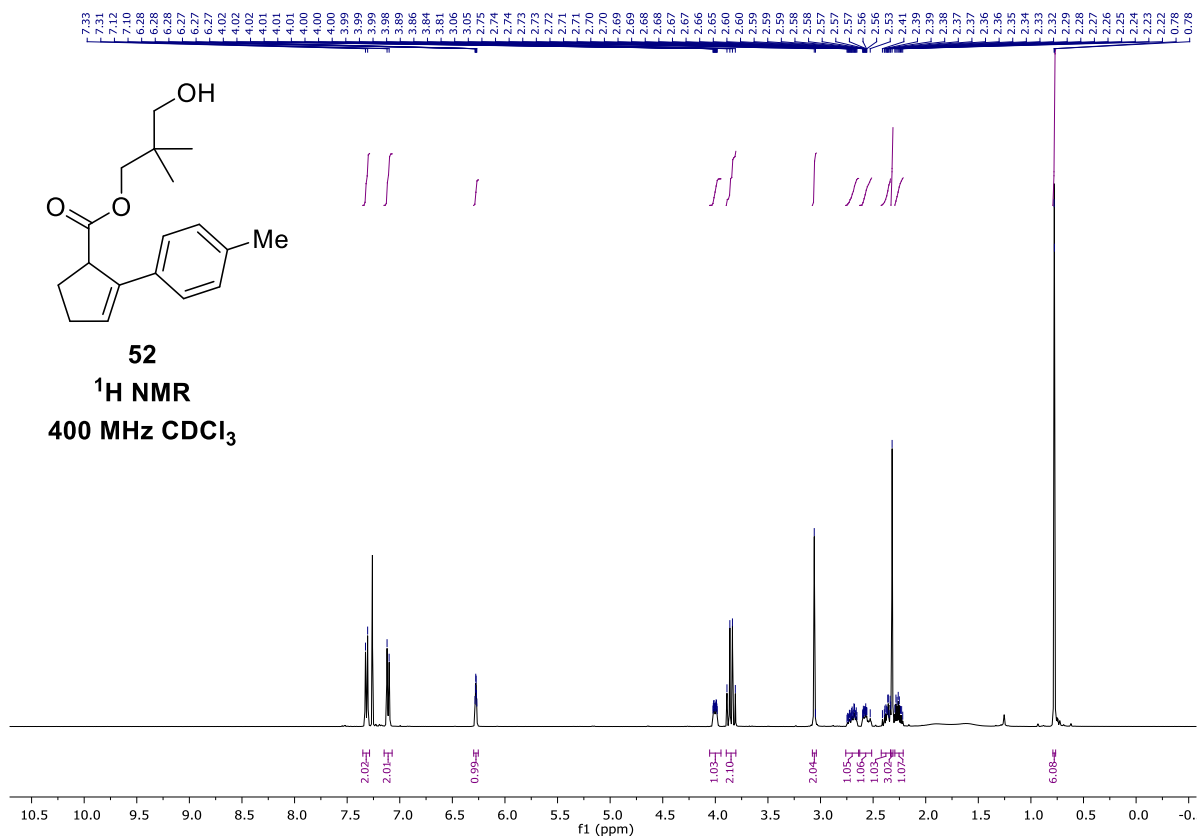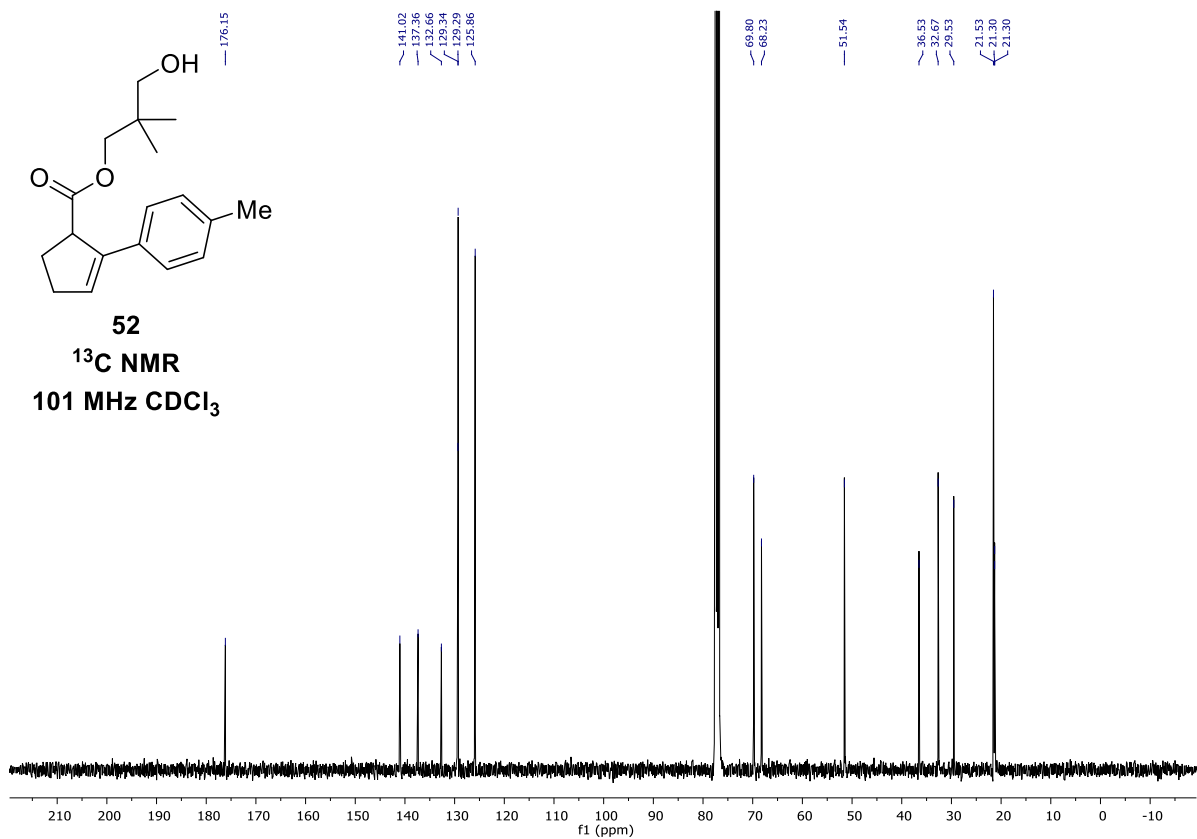

Supplement: c9sc03790j1.pdf [file c9sc03790j1.pdf]
